# Supplementary material for: Large-scale Evaluation of Prokaryotic Annotation Tools Across Thousands of Species
Source: Research Square preprint supplement (doi:10.21203/rs.3.rs-7317585/v1), 2025-08-13
Supplement: Supplementary file 1 [file 31b91a3dd29021c0818c785a.xlsx]

## Sheet: Main
Title:	Large-scale Evaluation of Prokaryotic Annotation Tools Across Thousands of Species; Supplementary raw data
Authors:	Mateusz Jundzill, Martin Hölzer, Serghei Mangul, Mike Marquet, Ralf Ehricht, Mara Lohde, Riccardo Spott, Oliwia Makarewicz, Mathias W. Pletz, Christian Brandt
Content
Summary Statistics: Escherichia coli	Summary statistics (minimum, 1st quartile, 3st quartile, mean, median, maximum value) for analyzed variables for baseline, Escherichia coli subset
Summary Statistics: Archaea	Summary statistics (minimum, 1st quartile, 3st quartile, mean, median, maximum value) for analyzed variables for Archaea subset
Summary Statistics: Bacteria non-MAGs	Summary statistics (minimum, 1st quartile, 3st quartile, mean, median, maximum value) for analyzed variables for Bacteria non-Metagenome-assembled genomes subset
Summary Statistics: Bacteria MAGs	Summary statistics (minimum, 1st quartile, 3st quartile, mean, median, maximum value) for analyzed variables for Metagenome-assembled genomes subset
Summary Statistics: Frameshifts	Summary statistics (minimum, 1st quartile, 3st quartile, mean, median, maximum value) for analyzed variables for frameshifted genomes
Best performing tool: Escherichia coli	Best performing tool for each analyzed variable for baseline, Escherichia coli subset
Best performing tool: Archaea	Best performing tool for each analyzed variable for Archaea subset
Best performing tool: Bacteria non-MAGs	Best performing tool for each analyzed variable for Bacteria non-Metagenome-assemled genomes subset
Best performing tool: Bacteria MAGs	Best performing tool for each analyzed variable for Metagenome-assembled genomes subset
tmRNA in Archaea	List of archaeal samples with species taxonomy, NCBI accession ID and tmRNA count per tool where tmRNA genes were found
Serotyping Escherichia coli	Serotyping results for baseline, Escherichia coli subset as ECTyper output
Raw results: Escherichia ecoli	Raw variable counts for analyzed genomes of baseline, Escherichia coli subset
Raw results: Archaea	Raw variable counts for analyzed genomes of Archaea subset
Raw results: Bacteria MAGs	Raw variable counts for analyzed genomes of Bacteria Metagenome-assembled genomes subset
Raw results: Bacteria non-MAGs	Raw variable counts for analyzed genomes of Bacteria non-Metagenome-assembled genomes subset
Raw results: Frameshifts	Raw variable counts for analyzed genomes of Frameshifted genomes
Field Descriptions
A fields have tool name prefix and field category explained below:
Gene count - total predicted feature count
NCBI Accession - NCBI Genome Assembly Accession numbers
Undescribed genes - Features with unknown function as described in methods section of the main article
Undescribed genes [%] - Features with unknown function as proportion of total amount of discovered features
rRNA – Ribosomal RNA feature count
tRNA – Transfer RNA feature count
tmRNA – Transfer-messenger RNA feature count
All Feature length – Average Total length of all features across the group
Described Feature length – Average Length of known-function features across the group
Undescribed Feature length – Average Length of unknown-function features across the group
GO Coverage – Raw count of features with at least 1 GO annotations in genome
GO Richness – Average GO term count per feature in genome
GO Coverage [%] – Proportion of features with at least 1 GO annotations in genome from all detected features set
GO Coverage (undescribed) – Proportion of features with at least 1 GO annotations in genome from described features set
COG Sum – Count of annotated features containg at least one COG controled vocabulary term
COG Cat Sum – Count of annotated features containg at least one COG category term
CAZy Sum - Count of annotated features containg at least one Carbohydrate-Active enZYmes (CAZy) term
EC Sum - Count of annotated features containg at least one Enzyme Commission (EC) term
Pfam Sum - Count of annotated features containg at least one Pfam database controled vocabulary term
KEGG ko Sum – Count of annotated features containing at least one Kyoto Encyclopedia of Genes and Genomes (KEGG) KO (Kyoto Orthology) term
KEGG rclass Sum – Count of annotated features containing at least one KEGG rclass term (classification of reaction types)
KEGG TC Sum – Count of annotated features containing at least one KEGG TC (Transporter Classification) term
KEGG Reaction Sum – Count of annotated features containing at least one KEGG Reaction term
KEGG Module Sum – Count of annotated features containing at least one KEGG Module term
RFAM Sum – Count of annotated features containing at least one RFAM (RNA family) domain
KEGG Pathway Sum - Count of annotated features containg at least one Kyoto Encyclopaedia of Genes and Genomes (KEGG) Pathway term
BRITE Sum - Count of annotated features containg at least one KEGG BRITE database controled vocabulary term
BiGG Reaction Sum - Count of annotated features containg at least one BiGG Models database controled vocabulary term
UniprotKB/UniRef / UniParc Sum – Count of annotated features containg at least one UniProt Knowledgebase (UniProtKB)/UniProt Reference Cluster (UniRef) / UniProt Archive (UniParc) accessions
SO Sum - Count of annotated features containg at least one Sequence Ontology (SO) terms
GO Fun / Pro / Comp Sum – Count of annotated features containg at least one GO domains Molecular Function (Fun), Biological Process (Pro), Cellular Component (Comp)
COG [%] – Proportion of annotated features containg at least one COG controled vocabulary term from total count of discovered features
COG category [%] – Proportion of annotated features containg at least one COG category from total count of discovered features
CAZy [%] - Proportion of annotated features containg at least one Carbohydrate-Active enZYmes (CAZy) term from total count of discovered features
EC [%] - Proportion of annotated features containg at least one Enzyme Commission (EC) term from total count of discovered features
Pfam [%] - Proportion of annotated features containg at least one Pfam database controled vocabulary term from total count of discovered features
KEGG Pathway [%] - Proportion of annotated features containg at least one Kyoto Encyclopaedia of Genes and Genomes (KEGG Pathway) Pathway ter from total count of discovered features
KEGG ko [%] – Proportion of annotated features containing at least one KEGG KO (Kyoto Orthology) term from the total count of discovered features
KEGG rclass [%] – Proportion of annotated features containing at least one KEGG rclass term (classification of reaction types) from the total count of discovered features
KEGG TC [%] – Proportion of annotated features containing at least one KEGG TC (Transporter Classification) term from the total count of discovered features
KEGG Reaction [%] – Proportion of annotated features containing at least one KEGG Reaction term from the total count of discovered features
KEGG Module [%] – Proportion of annotated features containing at least one KEGG Module term from the total count of discovered features
RFAM [%] – Proportion of annotated features containing at least one RFAM (RNA family) domain from the total count of discovered features
BRITE [%] - Proportion of annotated features containg at least one KEGG BRITE database controled vocabulary term from total count of discovered features
BiGG Reaction [%] - Proportion of annotated features containg at least one BiGG Models database controled vocabulary term from total count of discovered features
UniProtKB/UniRef / UniParc [%]– Proportion of annotated features containg at least one UniProt Knowledgebase (UniProtKB)/UniProt Reference Cluster (UniRef) / UniProt Archive (UniParc) accession from total count of discovered features
SO [%] - Proportion of annotated features containg at least one Sequence Ontology (SO) term from total count of discovered features
GO Fun / Pro / Comp [%]– Proportion of annotated features containg at least one GO domains Molecular Function (Fun), Biological Process (Pro), Cellular Component (Comp from total count of discovered features
COG Nonundescribed [%] – Proportion of annotated features containg at least one COG controled vocabulary term from total described feature subset
COG category Nonundescribed [%] – Proportion of annotated features containg at least one COG category from total described feature subset
CAZy Nonundescribed [%] - Proportion of annotated features containg at least one Carbohydrate-Active enZYmes (CAZy) term from total described feature subset
EC Nonundescribed [%] - Proportion of annotated features containg at least one Enzyme Commission (EC) term from total described feature subset
Pfam Nonundescribed [%] - Proportion of annotated features containg at least one Pfam database controled vocabulary term from total described feature subset
EGG ko Nonundescribed [%] – Proportion of annotated features containing at least one Kyoto Encyclopedia of Genes and Genomes (KEGG) KO (Kyoto Orthology) term from the total count of undescribed features
KEGG rclass Nonundescribed [%] – Proportion of annotated features containing at least one KEGG rclass term (classification of reaction types) from the total count of undescribed features
KEGG TC Nonundescribed [%] – Proportion of annotated features containing at least one KEGG TC (Transporter Classification) term from the total count of undescribed features
KEGG Reaction Nonundescribed [%] – Proportion of annotated features containing at least one KEGG Reaction term from the total count of undescribed features
KEGG Module Nonundescribed [%] – Proportion of annotated features containing at least one KEGG Module term from the total count of undescribed features
RFAM Nonundescribed [%] – Proportion of annotated features containing at least one RFAM (RNA family) domain from the total count of undescribed features
KEGG Pathway Nonundescribed [%] - Proportion of annotated features containg at least one Kyoto Encyclopaedia of Genes and Genomes (KEGG Pathway) Pathway term from total described feature subset
BRITE Nonundescribed [%] - Proportion of annotated features containg at least one KEGG BRITE database controled vocabulary term from total described feature subset
BiGG Reaction Nonundescribed [%] - Proportion of annotated features containg at least one BiGG Models database controled vocabulary term from total described feature subset
UniProtKB/UniRef / UniParc Nonundescribed – Proportion of annotated features containg at least one UniProt Knowledgebase (UniProtKB)/UniProt Reference Cluster (UniRef) / UniProt Archive (UniParc) accessions from total described feature subset
SO Nonundescribed [%] - Proportion of annotated features containg at least one Sequence Ontology (SO) termsfrom total described feature subset
GO Fun / Pro / Comp Nonundescribed – Proportion of annotated features containg at least one GO domains Molecular Function (Fun), Biological Process (Pro), Cellular Component (Comp)from total described feature subset
Median COG – Median of annotated features containing COG controled vocabulary term in features in genomes
Median COG Category– Median of annotated features containing COG category term in features in genomes
Median CAZy - Median of annotated features containing Carbohydrate-Active enZYmes (CAZy) term in features in genomes
Median EC - Median of annotated features containing Enzyme Commission (EC) term in features in genomes
Median Pfam - Median of annotated features containing Pfam database controled vocabulary term in features in genomes
Median KEGG ko – Median of annotated features containing Kyoto Encyclopedia of Genes and Genomes (KEGG) KO (Kyoto Orthology) termin features in genome
Median KEGG rclass – Median of annotated features containing KEGG rclass term (classification of reaction types)in features in genome
Median KEGG TC – Median of annotated features containing KEGG TC (Transporter Classification) termin features in genome
Median KEGG Reaction – Median of annotated features containing KEGG Reaction termin features in genome
Median KEGG Module – Median of annotated features containing KEGG Module termin features in genome
Median RFAM – Median of annotated features containing RFAM (RNA family) domainin features in genome
Median KEGG Pathway - Median of annotated features containing Kyoto Encyclopaedia of Genes and Genomes (KEGG Pathway) Pathway term in features in genomes
Median BRITE - Median of annotated features containing KEGG BRITE database controled vocabulary term in features in genomes
Median BiGG Reaction - Median of annotated features containing BiGG Models database controled vocabulary term in features in genomes
Median UniProtKB/UniRef/UniParc – Median of annotated features containing UniProt Knowledgebase (UniProtKB)/UniProt Reference Cluster (UniRef) / UniProt Archive (UniParc) accessions in features in genomes
Median SO - Median of annotated features containing Sequence Ontology (SO) terms in features in genomes
Median GO Fun / Pro / Comp – Median of annotated features containing GO domains Molecular Function (Fun), Biological Process (Pro), Cellular Component (Comp) in features in genomes
Domain unknow function - Sum of detected features description with wordin DUF/Domain of Unknow Function in genomes
Total Coding Space – Total length of detected coding sequences (described and undescribed) in base pairs
Described Coding Space – Total length of detected coding space with known functions
Undescribed Coding Space – Total length of detected of coding space with unknown functions
Best performing tool specific:
In case of equal values between two tools both tools names are presented
Highest - Tool name that had the highest value from all investigated tools
Lowest - Tool name that had the lowest value from all investigated tools
GTDB Phylum – Phylum classification based on the Genome Taxonomy Database (GTDB)
GTDB Class – Class classification based on the Genome Taxonomy Database (GTDB)
GTDB Order – Order classification based on the Genome Taxonomy Database (GTDB)
GTDB Family – Family classification based on the Genome Taxonomy Database (GTDB)
GTDB Genus – Genus classification based on the Genome Taxonomy Database (GTDB)
GTDB Species – Species classification based on the Genome Taxonomy Database (GTDB)
NCBI Phylum – Phylum classification based on the National Center for Biotechnology Information (NCBI) taxonomy
NCBI Class – Class classification based on the National Center for Biotechnology Information (NCBI) taxonomy
NCBI Order – Order classification based on the National Center for Biotechnology Information (NCBI) taxonomy
NCBI Family – Family classification based on the National Center for Biotechnology Information (NCBI) taxonomy
NCBI Genus – Genus classification based on the National Center for Biotechnology Information (NCBI) taxonomy
NCBI Species – Species classification based on the National Center for Biotechnology Information (NCBI) taxonomy

## Sheet: Summary Statistics Escherichia 
Prokka gene count	Bakta gene count	PGAP gene count	EggNOG-mapper gene count	Prokka undescribed genes	Bakta undescribed genes	PGAP undescribed genes	EggNOG-mapper undescribed genes	Prokka undescribed genes [%]	Bakta undescribed genes [%]	PGAP undescribed genes [%]	EggNOG-mapper undescribed genes [%]	Prokka rRNA	Bakta rRNA	PGAP rRNA	Prokka tRNA	Bakta tRNA	PGAP tRNA	Prokka tmRNA	Bakta tmRNA	PGAP tmRNA	Prokka All Feature lenght	Bakta All Feature lenght	PGAP All Feature lenght	EggNOG-mapper All Feature lenght	Prokka Described Feature lenght	Bakta Described Feature lenght	PGAP Described Feature lenght	EggNOG-mapper Described Feature lenght	Prokka undescribed Feature lenght	Bakta undescribed Feature lenght	PGAP undescribed Feature lenght	EggNOG-mapper undescribed Feature lenght	Prokka GO Coverage	Bakta GO Coverage	EggNOG-mapper GO Coverage	PGAP GO Coverage	Bakta GO Richness	EggNOG-mapper GO Richness	PGAP GO Richness	Prokka GO Coverage [%]	Bakta GO Coverage [%]	EggNOG-mapper GO Coverage [%]	PGAP GO Coverage [%]	Prokka GO Coverage in nonundescribed Features [%]	Bakta GO Coverage in nonundescribed Features [%]	EggNOG-mapper GO Coverage in nonundescribed Features [%]	PGAP GO Coverage in nonundescribed Features [%]	Prokka COG Sum	Prokka Prodigal Sum
Min. : 2513	Min. : 2750	Min. : 2916	Min. : 2688	Min. : 665	Min. : 3.00	Min. : 284.0	Min. : 114.0	Min. :17.89	Min. : 0.1030	Min. : 7.231	Min. : 3.148	Min. : 0.00	Min. : 0.000	Min. : 0.00	Min. : 13.00	Min. : 14.00	Min. : 13.00	Min. :0.000	Min. :0.000	Min. :0.000	Min. :109.3	Min. :108.9	Min. :106.4	Min. :109.3	Min. :118.2	Min. :115.0	Min. :126.4	Min. :123.2	Min. :100.1	Min. : 44.69	Min. : 57.47	Min. : 68.44	Min. :0	Min. : 132	Min. :1314	Min. :1072	Min. :3	Min. :35.00	Min. :2	Min. :0	Min. : 2.923	Min. :25.38	Min. :20.03	Min. :0	Min. : 3.14	Min. :28.86	Min. :35.88	Min. :1529	Min. : 2492
1st Qu.: 4703	1st Qu.: 5038	1st Qu.: 5192	1st Qu.: 4698	1st Qu.:1227	1st Qu.: 22.00	1st Qu.: 627.0	1st Qu.: 342.0	1st Qu.:26.08	1st Qu.: 0.4284	1st Qu.:12.022	1st Qu.: 7.249	1st Qu.: 5.00	1st Qu.: 5.000	1st Qu.: 7.00	1st Qu.: 73.00	1st Qu.: 76.00	1st Qu.: 73.00	1st Qu.:1.000	1st Qu.:1.000	1st Qu.:1.000	1st Qu.:302.8	1st Qu.:298.3	1st Qu.:298.0	1st Qu.:298.6	1st Qu.:330.0	1st Qu.:299.7	1st Qu.:309.1	1st Qu.:302.9	1st Qu.:233.4	1st Qu.: 93.94	1st Qu.:117.18	1st Qu.: 144.58	1st Qu.:0	1st Qu.:3265	1st Qu.:3197	1st Qu.:1939	1st Qu.:4	1st Qu.:36.00	1st Qu.:2	1st Qu.:0	1st Qu.:60.484	1st Qu.:62.81	1st Qu.:34.91	1st Qu.:0	1st Qu.:60.87	1st Qu.:69.36	1st Qu.:40.64	1st Qu.:2861	1st Qu.: 4615
Median : 4903	Median : 5246	Median : 5443	Median : 4913	Median :1379	Median : 29.00	Median : 710.0	Median : 416.0	Median :28.12	Median : 0.5588	Median :13.061	Median : 8.465	Median : 9.00	Median : 9.000	Median : 12.00	Median : 80.00	Median : 82.00	Median : 80.00	Median :1.000	Median :1.000	Median :1.000	Median :307.8	Median :303.2	Median :304.1	Median :305.0	Median :331.7	Median :304.4	Median :314.1	Median :309.1	Median :240.6	Median :108.11	Median :125.36	Median : 286.58	Median :0	Median :3378	Median :3254	Median :1970	Median :4	Median :37.00	Median :2	Median :0	Median :63.409	Median :65.76	Median :36.24	Median :0	Median :63.84	Median :71.96	Median :41.71	Median :2888	Median : 4812
Mean : 4923	Mean : 5272	Mean : 5484	Mean : 4944	Mean :1402	Mean : 34.84	Mean : 738.6	Mean : 430.6	Mean :28.27	Mean : 0.6428	Mean :13.326	Mean : 8.581	Mean : 9.76	Mean : 9.602	Mean : 13.89	Mean : 78.74	Mean : 81.72	Mean : 78.74	Mean :1.003	Mean :1.001	Mean :1.006	Mean :306.4	Mean :301.9	Mean :302.4	Mean :303.3	Mean :330.8	Mean :303.1	Mean :312.6	Mean :309.1	Mean :240.4	Mean :111.59	Mean :125.82	Mean : 240.20	Mean :0	Mean :3353	Mean :3251	Mean :1973	Mean :4	Mean :36.69	Mean :2	Mean :0	Mean :63.886	Mean :66.07	Mean :36.12	Mean :0	Mean :64.29	Mean :72.22	Mean :41.66	Mean :2892	Mean : 4829
3rd Qu.: 5108	3rd Qu.: 5469	3rd Qu.: 5734	3rd Qu.: 5157	3rd Qu.:1553	3rd Qu.: 39.00	3rd Qu.: 818.0	3rd Qu.: 503.0	3rd Qu.:30.40	3rd Qu.: 0.7319	3rd Qu.:14.324	3rd Qu.: 9.783	3rd Qu.: 11.00	3rd Qu.:11.000	3rd Qu.: 21.00	3rd Qu.: 85.00	3rd Qu.: 88.00	3rd Qu.: 85.00	3rd Qu.:1.000	3rd Qu.:1.000	3rd Qu.:1.000	3rd Qu.:311.4	3rd Qu.:306.7	3rd Qu.:308.5	3rd Qu.:309.4	3rd Qu.:333.2	3rd Qu.:307.8	3rd Qu.:317.6	3rd Qu.:318.3	3rd Qu.:247.5	3rd Qu.:124.47	3rd Qu.:134.36	3rd Qu.: 303.66	3rd Qu.:0	3rd Qu.:3444	3rd Qu.:3295	3rd Qu.:2002	3rd Qu.:4	3rd Qu.:37.00	3rd Qu.:2	3rd Qu.:0	3rd Qu.:67.329	3rd Qu.:69.20	3rd Qu.:37.46	3rd Qu.:0	3rd Qu.:67.73	3rd Qu.:75.02	3rd Qu.:42.77	3rd Qu.:2916	3rd Qu.: 5013
Max. :12563	Max. :12849	Max. :11606	Max. :12490	Max. :6329	Max. :3073.00	Max. :6025.0	Max. :3443.0	Max. :50.38	Max. :26.3415	Max. :52.740	Max. :28.448	Max. :113.00	Max. :90.000	Max. :124.00	Max. :163.00	Max. :286.00	Max. :163.00	Max. :4.000	Max. :3.000	Max. :4.000	Max. :330.7	Max. :330.2	Max. :324.8	Max. :447.2	Max. :359.8	Max. :332.0	Max. :339.1	Max. :369.7	Max. :298.6	Max. :359.10	Max. :202.37	Max. :2321.31	Max. :0	Max. :4048	Max. :5758	Max. :2395	Max. :5	Max. :44.00	Max. :2	Max. :0	Max. :81.710	Max. :83.76	Max. :44.11	Max. :0	Max. :81.87	Max. :86.48	Max. :49.43	Max. :5252	Max. :12444
[truncated: 141 more columns]

## Sheet: Summary Statistics Archaea
Prokka gene count	Bakta gene count	PGAP gene count	EggNOG-mapper gene count	Prokka undescribed genes	Bakta undescribed genes	PGAP undescribed genes	EggNOG-mapper undescribed genes	Prokka undescribed genes [%]	Bakta undescribed genes [%]	PGAP undescribed genes [%]	EggNOG-mapper undescribed genes [%]	Prokka rRNA	Bakta rRNA	PGAP rRNA	Prokka tRNA	Bakta tRNA	PGAP tRNA	Prokka tmRNA	Bakta tmRNA	PGAP tmRNA	Prokka All Feature lenght	Bakta All Feature lenght	PGAP All Feature lenght	EggNOG-mapper All Feature lenght	Prokka Described Feature lenght	Bakta Described Feature lenght	PGAP Described Feature lenght	EggNOG-mapper Described Feature lenght	Prokka undescribed Feature lenght	Bakta undescribed Feature lenght	PGAP undescribed Feature lenght	EggNOG-mapper undescribed Feature lenght	Prokka GO Coverage	Bakta GO Coverage	EggNOG-mapper GO Coverage	PGAP GO Coverage	Bakta GO Richness	EggNOG-mapper GO Richness	PGAP GO Richness	Prokka GO Coverage [%]	Bakta GO Coverage [%]	EggNOG-mapper GO Coverage [%]	PGAP GO Coverage [%]	Prokka GO Coverage in nonundescribed Features [%]	Bakta GO Coverage in nonundescribed Features [%]	EggNOG-mapper GO Coverage in nonundescribed Features [%]	PGAP GO Coverage in nonundescribed Features [%]	Prokka COG Sum	Prokka Prodigal Sum
Min. : 343	Min. : 347	Min. : 360	Min. : 364	Min. : 224.0	Min. : 302	Min. : 54.0	Min. : 91.0	Min. :46.99	Min. : 3.849	Min. : 8.487	Min. : 8.74	Min. : 0.00	Min. : 0.000	Min. : 0.000	Min. : 0.00	Min. : 4.00	Min. : 2.00	Min. :0.00000	Min. :0.00000	Min. :0.00000	Min. :129.8	Min. :129.9	Min. :133.2	Min. :129.1	Min. :181.3	Min. :176.1	Min. :170.7	Min. :163.8	Min. :122.2	Min. :129.0	Min. :103.1	Min. : 97.03	Min. : 0.00	Min. : 0.000	Min. : 0.0	Min. : 72.0	Min. :2.000	Min. : 6.0	Min. :2	Min. : 0.000	Min. :0.00000	Min. : 0.000	Min. : 6.383	Min. : 0.000	Min. :0.0000	Min. : 0.000	Min. :20.26	Min. : 49.0	Min. : 329
1st Qu.:1232	1st Qu.: 1272	1st Qu.:1289	1st Qu.:1270	1st Qu.: 823.5	1st Qu.:1068	1st Qu.: 397.5	1st Qu.: 520.0	1st Qu.:62.45	1st Qu.:83.730	1st Qu.:24.792	1st Qu.:27.71	1st Qu.: 1.00	1st Qu.: 1.000	1st Qu.: 2.000	1st Qu.:31.00	1st Qu.: 32.00	1st Qu.:32.00	1st Qu.:0.00000	1st Qu.:0.00000	1st Qu.:0.00000	1st Qu.:253.1	1st Qu.:253.6	1st Qu.:258.4	1st Qu.:253.1	1st Qu.:332.9	1st Qu.:290.3	1st Qu.:294.4	1st Qu.:261.4	1st Qu.:216.8	1st Qu.:249.1	1st Qu.:175.3	1st Qu.:215.62	1st Qu.: 0.00	1st Qu.: 1.000	1st Qu.: 31.0	1st Qu.: 263.0	1st Qu.:2.000	1st Qu.:25.0	1st Qu.:2	1st Qu.: 0.000	1st Qu.:0.06031	1st Qu.: 1.263	1st Qu.:17.769	1st Qu.: 0.000	1st Qu.:0.3906	1st Qu.: 1.827	1st Qu.:27.48	1st Qu.: 203.0	1st Qu.:1208
Median :1706	Median : 1765	Median :1776	Median :1747	Median :1118.0	Median :1487	Median : 536.0	Median : 692.0	Median :67.97	Median :86.903	Median :30.164	Median :39.80	Median : 2.00	Median : 2.000	Median : 3.000	Median :39.00	Median : 39.00	Median :39.00	Median :0.00000	Median :0.00000	Median :0.00000	Median :273.1	Median :273.4	Median :276.8	Median :272.9	Median :345.2	Median :306.3	Median :308.1	Median :286.1	Median :237.6	Median :269.2	Median :192.4	Median :252.85	Median : 0.00	Median : 2.000	Median : 79.0	Median : 391.0	Median :2.000	Median :45.0	Median :2	Median : 0.000	Median :0.11236	Median : 6.306	Median :19.982	Median : 0.000	Median :0.8621	Median :13.932	Median :29.93	Median : 345.0	Median :1677
Mean :1986	Mean : 2070	Mean :2053	Mean :2019	Mean :1359.4	Mean :1744	Mean : 636.4	Mean : 793.4	Mean :67.91	Mean :85.352	Mean :32.017	Mean :42.09	Mean : 2.42	Mean : 2.407	Mean : 3.023	Mean :38.12	Mean : 38.54	Mean :38.34	Mean :0.01433	Mean :0.02186	Mean :0.01075	Mean :272.6	Mean :273.0	Mean :277.2	Mean :273.2	Mean :344.5	Mean :306.5	Mean :310.6	Mean :284.7	Mean :240.5	Mean :269.2	Mean :200.9	Mean :248.73	Mean : 36.92	Mean : 2.411	Mean : 92.5	Mean : 405.8	Mean :2.001	Mean :38.7	Mean :2	Mean : 1.934	Mean :0.13222	Mean : 5.797	Mean :20.255	Mean : 5.959	Mean :1.0308	Mean :11.556	Mean :29.93	Mean : 359.2	Mean :1953
3rd Qu.:2458	3rd Qu.: 2564	3rd Qu.:2556	3rd Qu.:2494	3rd Qu.:1659.0	3rd Qu.:2136	3rd Qu.: 762.5	3rd Qu.: 921.0	3rd Qu.:73.64	3rd Qu.:89.221	3rd Qu.:39.452	3rd Qu.:56.94	3rd Qu.: 3.00	3rd Qu.: 3.000	3rd Qu.: 4.000	3rd Qu.:45.00	3rd Qu.: 46.00	3rd Qu.:46.00	3rd Qu.:0.00000	3rd Qu.:0.00000	3rd Qu.:0.00000	3rd Qu.:288.6	3rd Qu.:288.9	3rd Qu.:291.5	3rd Qu.:288.4	3rd Qu.:357.5	3rd Qu.:320.2	3rd Qu.:323.9	3rd Qu.:306.9	3rd Qu.:260.3	3rd Qu.:285.5	3rd Qu.:218.1	3rd Qu.:279.35	3rd Qu.: 0.00	3rd Qu.: 3.000	3rd Qu.:136.0	3rd Qu.: 522.0	3rd Qu.:2.000	3rd Qu.:50.0	3rd Qu.:2	3rd Qu.: 0.000	3rd Qu.:0.18450	3rd Qu.: 8.993	3rd Qu.:22.591	3rd Qu.: 0.000	3rd Qu.:1.4898	3rd Qu.:18.843	3rd Qu.:32.02	3rd Qu.: 473.5	3rd Qu.:2420
Max. :8270	Max. :17412	Max. :8131	Max. :8615	Max. :7687.0	Max. :7222	Max. :6280.0	Max. :7742.0	Max. :92.95	Max. :96.913	Max. :77.235	Max. :89.87	Max. :19.00	Max. :19.000	Max. :19.000	Max. :95.00	Max. :147.00	Max. :95.00	Max. :5.00000	Max. :3.00000	Max. :5.00000	Max. :392.1	Max. :391.6	Max. :392.2	Max. :391.3	Max. :405.8	Max. :427.5	Max. :427.0	Max. :401.9	Max. :392.2	Max. :391.6	Max. :362.0	Max. :424.35	Max. :5718.00	Max. :19.000	Max. :426.0	Max. :1171.0	Max. :3.000	Max. :97.0	Max. :2	Max. :100.000	Max. :0.86455	Max. :29.248	Max. :31.868	Max. :549.268	Max. :6.6667	Max. :35.842	Max. :42.92	Max. :1115.0	Max. :8209
																																					Non assigned :380	Non assigned :1
[truncated: 141 more columns]

## Sheet: Summary Statistics Bacteria non
Prokka gene count	Bakta gene count	PGAP gene count	EggNOG-mapper gene count	Prokka undescribed genes	Bakta undescribed genes	PGAP undescribed genes	EggNOG-mapper undescribed genes	Prokka undescribed genes [%]	Bakta undescribed genes [%]	PGAP undescribed genes [%]	EggNOG-mapper undescribed genes [%]	Prokka rRNA	Bakta rRNA	PGAP rRNA	Prokka tRNA	Bakta tRNA	PGAP tRNA	Prokka tmRNA	Bakta tmRNA	PGAP tmRNA	Prokka All Feature lenght	Bakta All Feature lenght	PGAP All Feature lenght	EggNOG-mapper All Feature lenght	Prokka Described Feature lenght	Bakta Described Feature lenght	PGAP Described Feature lenght	EggNOG-mapper Described Feature lenght	Prokka undescribed Feature lenght	Bakta undescribed Feature lenght	PGAP undescribed Feature lenght	EggNOG-mapper undescribed Feature lenght	Prokka GO Coverage	Bakta GO Coverage	EggNOG-mapper GO Coverage	PGAP GO Coverage	Bakta GO Richness	EggNOG-mapper GO Richness	PGAP GO Richness	Prokka GO Coverage [%]	Bakta GO Coverage [%]	EggNOG-mapper GO Coverage [%]	PGAP GO Coverage [%]	Prokka GO Coverage in nonundescribed Features [%]	Bakta GO Coverage in nonundescribed Features [%]	EggNOG-mapper GO Coverage in nonundescribed Features [%]	PGAP GO Coverage in nonundescribed Features [%]	Prokka COG Sum	Prokka Prodigal Sum
Min. : 242	Min. : 242	Min. : 248	Min. : 213	Min. : 8	Min. : 0.0	Min. : 5.0	Min. : 1.0	Min. : 1.794	Min. : 0.000	Min. : 1.08	Min. : 0.158	Min. : 0.000	Min. : 0.000	Min. : 0.000	Min. : 3.00	Min. : 4.00	Min. : 3.00	Min. :0.0000	Min. :0.0000	Min. :0.0000	Min. : 69.84	Min. : 69.83	Min. : 69.48	Min. : 69.51	Min. : 72.56	Min. : 94.75	Min. : 75.66	Min. : 75.8	Min. : 68.94	Min. : 29.5	Min. : 46.29	Min. : 36.0	Min. : 0.00	Min. : 0.0	Min. : 0.0	Min. : 121	Min. : 1.000	Min. : 6.0	Min. :1.000	Min. : 0.000	Min. : 0.0000	Min. : 0.000	Min. : 8.399	Min. : 0.000	Min. : 0.0000	Min. : 0.000	Min. :22.30	Min. : 51	Min. : 206
1st Qu.: 2462	1st Qu.: 2494	1st Qu.: 2563	1st Qu.: 2442	1st Qu.: 1071	1st Qu.: 63.0	1st Qu.: 432.0	1st Qu.: 393.0	1st Qu.:40.918	1st Qu.: 1.805	1st Qu.:14.31	1st Qu.:13.031	1st Qu.: 3.000	1st Qu.: 3.000	1st Qu.: 3.000	1st Qu.: 43.00	1st Qu.: 44.00	1st Qu.: 43.00	1st Qu.:1.0000	1st Qu.:1.0000	1st Qu.:1.0000	1st Qu.:305.88	1st Qu.:305.91	1st Qu.:308.12	1st Qu.:304.70	1st Qu.:346.39	1st Qu.:313.34	1st Qu.:328.10	1st Qu.:316.9	1st Qu.:250.04	1st Qu.: 109.8	1st Qu.:177.21	1st Qu.: 180.1	1st Qu.: 0.00	1st Qu.: 8.0	1st Qu.: 105.0	1st Qu.: 828	1st Qu.: 2.000	1st Qu.:32.0	1st Qu.:2.000	1st Qu.: 0.000	1st Qu.: 0.2389	1st Qu.: 2.975	1st Qu.:26.663	1st Qu.: 0.000	1st Qu.: 0.2598	1st Qu.: 3.865	1st Qu.:32.92	1st Qu.: 847	1st Qu.: 2404
Median : 3678	Median : 3714	Median : 3790	Median : 3649	Median : 1659	Median : 130.0	Median : 626.0	Median : 573.0	Median :45.704	Median : 3.507	Median :17.41	Median :15.953	Median : 4.000	Median : 4.000	Median : 5.000	Median : 48.00	Median : 50.00	Median : 48.00	Median :1.0000	Median :1.0000	Median :1.0000	Median :319.87	Median :319.95	Median :321.42	Median :319.24	Median :360.68	Median :326.37	Median :340.76	Median :332.7	Median :269.96	Median : 144.0	Median :197.82	Median : 234.3	Median : 0.00	Median : 22.0	Median : 264.0	Median :1129	Median : 4.000	Median :36.0	Median :2.000	Median : 0.000	Median : 0.6619	Median : 8.762	Median :30.467	Median : 0.000	Median : 0.7089	Median :10.856	Median :36.92	Median :1202	Median : 3615
Mean : 3878	Mean : 3921	Mean : 4007	Mean : 3858	Mean : 1842	Mean : 223.9	Mean : 730.7	Mean : 667.8	Mean :45.816	Mean : 6.811	Mean :17.88	Mean :17.558	Mean : 6.182	Mean : 6.316	Mean : 7.599	Mean : 51.68	Mean : 53.21	Mean : 51.59	Mean :0.9466	Mean :0.9796	Mean :0.9851	Mean :317.80	Mean :317.87	Mean :321.43	Mean :317.00	Mean :360.15	Mean :326.12	Mean :342.44	Mean :332.2	Mean :269.08	Mean : 156.0	Mean :200.48	Mean : 241.9	Mean : 47.16	Mean : 92.5	Mean : 418.3	Mean :1162	Mean : 3.593	Mean :35.5	Mean :2.019	Mean : 1.353	Mean : 2.4024	Mean :11.441	Mean :31.201	Mean : 2.559	Mean : 2.5090	Mean :13.683	Mean :37.89	Mean :1284	Mean : 3815
3rd Qu.: 4875	3rd Qu.: 4934	3rd Qu.: 5034	3rd Qu.: 4851	3rd Qu.: 2326	3rd Qu.: 273.0	3rd Qu.: 902.0	3rd Qu.: 833.0	3rd Qu.:51.455	3rd Qu.: 7.606	3rd Qu.:20.67	3rd Qu.:19.787	3rd Qu.: 7.000	3rd Qu.: 7.000	3rd Qu.: 9.000	3rd Qu.: 59.00	3rd Qu.: 61.00	3rd Qu.: 59.00	3rd Qu.:1.0000	3rd Qu.:1.0000	3rd Qu.:1.0000	3rd Qu.:331.90	3rd Qu.:331.99	3rd Qu.:333.52	3rd Qu.:331.41	3rd Qu.:373.61	3rd Qu.:338.64	3rd Qu.:354.01	3rd Qu.:349.0	3rd Qu.:289.85	3rd Qu.: 186.6	3rd Qu.:219.68	3rd Qu.: 308.4	3rd Qu.: 0.00	3rd Qu.: 106.0	3rd Qu.: 630.0	3rd Qu.:1460	3rd Qu.: 5.000	3rd Qu.:43.0	3rd Qu.:2.000	3rd Qu.: 0.000	3rd Qu.: 2.4400	3rd Qu.:17.037	3rd Qu.:34.473	3rd Qu.: 0.000	3rd Qu.: 2.5661	3rd Qu.:20.398	3rd Qu.:41.85	3rd Qu.:1671	3rd Qu.: 4806
Max. :15067	Max. :16996	Max. :15903	Max. :14980	Max. :11160	Max. :8904.0	Max. :6707.0	Max. :5981.0	Max. :89.148	Max. :90.320	Max. :80.08	Max. :92.919	Max. :134.000	Max. :108.000	Max. :227.000	Max. :251.00	Max. :251.00	Max. :251.00	Max. :5.0000	Max. :5.0000	Max. :7.0000	Max. :461.03	Max. :462.68	Max. :469.90	Max. :602.90	Max. :547.58	Max. :482.43	Max. :519.88	Max. :478.6	Max. :456.62	Max. :1025.7	Max. :574.76	Max. :1296.2	Max. :10072.00	Max. :3390.0	Max. :4515.0	Max. :3109	Max. :10.000	Max. :70.0	Max. :3.000	Max. :100.000	Max. :87.9433	Max. :93.952	Max. :80.000	Max. :309.819	Max. :90.6764	Max. :95.604	Max. :89.34	Max. :4511	Max. :14972
																														NA's :2							Non assigned: 642	Non assigned: 3
[truncated: 129 more columns]

## Sheet: Summary Statistics MAGs
Prokka gene count	Bakta gene count	PGAP gene count	EggNOG-mapper gene count	Prokka undescribed genes	Bakta undescribed genes	PGAP undescribed genes	EggNOG-mapper undescribed genes	Prokka undescribed genes [%]	Bakta undescribed genes [%]	PGAP undescribed genes [%]	EggNOG-mapper undescribed genes [%]	Prokka rRNA	Bakta rRNA	PGAP rRNA	Prokka tRNA	Bakta tRNA	PGAP tRNA	Prokka tmRNA	Bakta tmRNA	PGAP tmRNA	Prokka All Feature lenght	Bakta All Feature lenght	PGAP All Feature lenght	EggNOG-mapper All Feature lenght	Prokka Described Feature lenght	Bakta Described Feature lenght	PGAP Described Feature lenght	EggNOG-mapper Described Feature lenght	Prokka undescribed Feature lenght	Bakta undescribed Feature lenght	PGAP undescribed Feature lenght	EggNOG-mapper undescribed Feature lenght	Prokka GO Coverage	Bakta GO Coverage	EggNOG-mapper GO Coverage	PGAP GO Coverage	Prokka GO Richness	Bakta GO Richness	EggNOG-mapper GO Richness	PGAP GO Richness	Prokka GO Coverage [%]	Bakta GO Coverage [%]	EggNOG-mapper GO Coverage [%]	PGAP GO Coverage [%]	Prokka GO Coverage in nonundescribed Features [%]	Bakta GO Coverage in nonundescribed Features [%]	EggNOG-mapper GO Coverage in nonundescribed Features [%]	PGAP GO Coverage in nonundescribed Features [%]	Prokka COG Sum
Min. : 338	Min. : 340	Min. : 341	Min. : 300	Min. : 36	Min. : 12.0	Min. : 52.0	Min. : 15.0	Min. : 5.863	Min. : 0.3547	Min. : 6.429	Min. : 2.577	Min. : 0.000	Min. : 0.000	Min. : 0.000	Min. : 4.0	Min. : 4.0	Min. : 4.00	Min. :0.000	Min. :0.0000	Min. :0.0000	Min. : 69.45	Min. : 69.37	Min. : 74.54	Min. : 69.39	Min. : 79.39	Min. : 84.13	Min. : 92.74	Min. : 73.72	Min. : 67.57	Min. : 68.75	Min. : 71.22	Min. : 68.7	Min. : 0.00	Min. : 0.000	Min. : 3.0	Min. : 134.0	Min. :4	Min. :0	Min. : 6.00	Min. :2.000	Min. : 0.00	Min. : 0.00000	Min. : 0.1785	Min. : 9.855	Min. : 0.000	Min. : 0.00000	Min. : 0.2065	Min. :24.29	Min. : 109.0
1st Qu.:1522	1st Qu.: 1565	1st Qu.: 1607	1st Qu.:1584	1st Qu.: 686	1st Qu.: 239.0	1st Qu.: 321.0	1st Qu.: 460.0	1st Qu.:44.911	1st Qu.:10.9962	1st Qu.:17.691	1st Qu.:23.933	1st Qu.: 0.000	1st Qu.: 0.000	1st Qu.: 1.000	1st Qu.: 31.0	1st Qu.: 32.0	1st Qu.: 31.00	1st Qu.:0.000	1st Qu.:0.0000	1st Qu.:1.0000	1st Qu.:289.24	1st Qu.:289.58	1st Qu.:294.17	1st Qu.:287.55	1st Qu.:335.65	1st Qu.:306.14	1st Qu.:317.31	1st Qu.:293.44	1st Qu.:240.23	1st Qu.:190.68	1st Qu.:196.80	1st Qu.:275.0	1st Qu.: 0.00	1st Qu.: 1.000	1st Qu.: 76.0	1st Qu.: 565.0	1st Qu.:4	1st Qu.:2.000	1st Qu.:38.00	1st Qu.:2.000	1st Qu.: 0.00	1st Qu.: 0.02355	1st Qu.: 4.1579	1st Qu.:27.639	1st Qu.: 0.000	1st Qu.: 0.03337	1st Qu.: 6.3553	1st Qu.:37.20	1st Qu.: 514.0
Median :2252	Median : 2323	Median : 2351	Median :2332	Median :1086	Median : 599.0	Median : 478.0	Median : 668.0	Median :50.546	Median :31.0356	Median :22.199	Median :33.092	Median : 1.000	Median : 1.000	Median : 2.000	Median : 38.0	Median : 39.0	Median : 38.00	Median :1.000	Median :1.0000	Median :1.0000	Median :308.79	Median :308.93	Median :312.30	Median :307.38	Median :348.88	Median :321.13	Median :334.80	Median :314.32	Median :265.82	Median :257.45	Median :224.55	Median :300.2	Median : 0.00	Median : 2.000	Median : 139.0	Median : 774.0	Median :4	Median :2.000	Median :43.00	Median :2.000	Median : 0.00	Median : 0.07119	Median : 6.2028	Median :31.023	Median : 0.000	Median : 0.10941	Median : 9.7938	Median :40.61	Median : 718.0
Mean :2488	Mean : 2595	Mean : 2572	Mean :2560	Mean :1301	Mean : 802.6	Mean : 597.6	Mean : 841.7	Mean :50.572	Mean :31.0278	Mean :23.194	Mean :33.755	Mean : 1.552	Mean : 1.539	Mean : 2.148	Mean : 37.9	Mean : 38.3	Mean : 36.86	Mean :0.715	Mean :0.7278	Mean :0.8444	Mean :311.04	Mean :311.24	Mean :316.54	Mean :310.26	Mean :351.51	Mean :323.23	Mean :340.36	Mean :315.69	Mean :272.56	Mean :250.73	Mean :231.42	Mean :298.5	Mean : 62.06	Mean : 4.232	Mean : 163.9	Mean : 773.2	Mean :4	Mean :2.462	Mean :40.69	Mean :2.109	Mean : 2.55	Mean : 0.18346	Mean : 6.9536	Mean :31.536	Mean : 5.315	Mean : 0.25243	Mean :10.8007	Mean :41.00	Mean : 724.5
3rd Qu.:3238	3rd Qu.: 3319	3rd Qu.: 3335	3rd Qu.:3321	3rd Qu.:1685	3rd Qu.:1097.0	3rd Qu.: 730.0	3rd Qu.:1039.0	3rd Qu.:56.315	3rd Qu.:47.7157	3rd Qu.:27.978	3rd Qu.:43.014	3rd Qu.: 3.000	3rd Qu.: 3.000	3rd Qu.: 3.000	3rd Qu.: 44.0	3rd Qu.: 45.0	3rd Qu.: 43.00	3rd Qu.:1.000	3rd Qu.:1.0000	3rd Qu.:1.0000	3rd Qu.:329.65	3rd Qu.:329.78	3rd Qu.:335.13	3rd Qu.:329.40	3rd Qu.:366.37	3rd Qu.:337.71	3rd Qu.:357.96	3rd Qu.:335.42	3rd Qu.:299.42	3rd Qu.:306.57	3rd Qu.:260.14	3rd Qu.:327.5	3rd Qu.: 0.00	3rd Qu.: 3.000	3rd Qu.: 198.0	3rd Qu.: 986.0	3rd Qu.:4	3rd Qu.:2.000	3rd Qu.:46.00	3rd Qu.:2.000	3rd Qu.: 0.00	3rd Qu.: 0.15813	3rd Qu.: 8.4054	3rd Qu.:34.990	3rd Qu.: 0.000	3rd Qu.: 0.23781	3rd Qu.:14.2367	3rd Qu.:44.36	3rd Qu.: 926.0
Max. :9433	Max. :25545	Max. :10089	Max. :9497	Max. :6742	Max. :6151.0	Max. :3986.0	Max. :5307.0	Max. :82.575	Max. :94.0215	Max. :77.404	Max. :86.380	Max. :21.000	Max. :17.000	Max. :41.000	Max. :136.0	Max. :140.0	Max. :132.00	Max. :7.000	Max. :3.0000	Max. :7.0000	Max. :475.46	Max. :475.64	Max. :487.27	Max. :473.17	Max. :485.34	Max. :449.44	Max. :507.37	Max. :470.71	Max. :492.40	Max. :499.41	Max. :451.13	Max. :475.4	Max. :5238.00	Max. :623.000	Max. :2556.0	Max. :2008.0	Max. :4	Max. :9.000	Max. :57.00	Max. :3.000	Max. :100.00	Max. :19.70063	Max. :88.1443	Max. :70.492	Max. :295.649	Max. :20.04914	Max. :90.6360	Max. :83.27	Max. :2670.0
																																					NA's :3057
[truncated: 130 more columns]

## Sheet: Summary Statistics Frameshifts
Baseline – Escherichia coli
Frameshift 0.5%
Prokka gene count	Bakta gene count	PGAP gene count	EggNOG-mapper gene count	Prokka undescribed genes	Bakta undescribed genes	PGAP undescribed genes	EggNOG-mapper undescribed genes	Prokka undescribed genes [%]	Bakta undescribed genes [%]	PGAP undescribed genes [%]	EggNOG-mapper undescribed genes [%]	Prokka rRNA	Bakta rRNA	PGAP rRNA	Prokka tRNA	Bakta tRNA	PGAP tRNA	Prokka tmRNA	Bakta tmRNA	PGAP tmRNA	Prokka All Feature lenght	Bakta All Feature lenght	PGAP All Feature lenght	EggNOG-mapper All Feature lenght	Prokka Described Feature lenght	Bakta Described Feature lenght	PGAP Described Feature lenght	EggNOG-mapper Described Feature lenght	Prokka undescribed Feature lenght	Bakta undescribed Feature lenght	PGAP undescribed Feature lenght	EggNOG-mapper undescribed Feature lenght	Prokka GO Coverage	Bakta GO Coverage	EggNOG-mapper GO Coverage	PGAP GO Coverage	Prokka GO Richness	Bakta GO Richness	EggNOG-mapper GO Richness	PGAP GO Richness	Prokka GO Coverage [%]	Bakta GO Coverage [%]	EggNOG-mapper GO Coverage [%]	PGAP GO Coverage [%]	Prokka GO Coverage in nonundescribed Features [%]	Bakta GO Coverage in nonundescribed Features [%]	EggNOG-mapper GO Coverage in nonundescribed Features [%]	PGAP GO Coverage in nonundescribed Features [%]	Prokka Total Coding Space
Min. : 6106	Min. : 6328	Min. : 5587	Min. : 6090	Min. : 3095	Min. :1729	Min. :2890	Min. :1766	Min. :41.79	Min. :21.95	Min. :50.66	Min. :24.88	Min. : 0.000	Min. : 0.00	Min. : 0.000	Min. : 16.00	Min. : 19.00	Min. : 16.00	Min. :0.0000	Min. :0.0000	Min. :0.000	Min. : 91.22	Min. : 90.88	Min. : 85.64	Min. : 91.15	Min. : 93.68	Min. : 94.14	Min. : 98.72	Min. :105.6	Min. : 80.45	Min. : 84.42	Min. : 76.19	Min. : 66.33	Min. :0	Min. : 26.0	Min. :2369	Min. :1157	Min. :0	Min. :3.000	Min. :37.0	Min. :2	Min. :0	Min. :0.2505	Min. :19.27	Min. :17.49	Min. :0	Min. :0.527	Min. :29.34	Min. :37.54	Min. :1991662
1st Qu.:11310	1st Qu.:11607	1st Qu.: 9961	1st Qu.:11240	1st Qu.: 5477	1st Qu.:2944	1st Qu.:5191	1st Qu.:3162	1st Qu.:48.37	1st Qu.:25.24	1st Qu.:51.99	1st Qu.:28.04	1st Qu.: 5.000	1st Qu.: 4.00	1st Qu.: 4.000	1st Qu.: 73.00	1st Qu.: 77.00	1st Qu.: 73.00	1st Qu.:1.0000	1st Qu.:1.0000	1st Qu.:1.000	1st Qu.:108.37	1st Qu.:107.88	1st Qu.:105.42	1st Qu.:108.42	1st Qu.:115.45	1st Qu.:114.00	1st Qu.:120.42	1st Qu.:122.8	1st Qu.:100.79	1st Qu.: 90.64	1st Qu.: 85.84	1st Qu.: 72.09	1st Qu.:0	1st Qu.:494.0	1st Qu.:5555	1st Qu.:2099	1st Qu.:0	1st Qu.:3.000	1st Qu.:38.0	1st Qu.:2	1st Qu.:0	1st Qu.:4.0429	1st Qu.:46.62	1st Qu.:19.99	1st Qu.:0	1st Qu.:5.509	1st Qu.:65.98	1st Qu.:42.08	1st Qu.:3702246
Median :11699	Median :11997	Median :10370	Median :11624	Median : 5838	Median :3128	Median :5419	Median :3348	Median :49.91	Median :26.00	Median :52.29	Median :28.79	Median : 9.000	Median : 9.00	Median : 8.000	Median : 79.00	Median : 82.00	Median : 79.00	Median :1.0000	Median :1.0000	Median :1.000	Median :108.81	Median :108.31	Median :106.73	Median :108.85	Median :116.03	Median :114.46	Median :122.32	Median :123.3	Median :101.42	Median : 91.48	Median : 87.54	Median : 73.28	Median :0	Median :528.0	Median :5633	Median :2134	Median :0	Median :3.000	Median :38.0	Median :2	Median :0	Median :4.3614	Median :48.23	Median :20.60	Median :0	Median :5.901	Median :67.88	Median :43.16	Median :3831728
Mean :11707	Mean :12009	Mean :10414	Mean :11626	Mean : 5846	Mean :3126	Mean :5449	Mean :3355	Mean :49.84	Mean :26.00	Mean :52.31	Mean :28.81	Mean : 9.729	Mean : 9.49	Mean : 8.703	Mean : 78.41	Mean : 82.27	Mean : 78.41	Mean :0.9671	Mean :0.9676	Mean :1.003	Mean :108.78	Mean :108.30	Mean :106.68	Mean :108.93	Mean :116.01	Mean :114.45	Mean :122.28	Mean :123.2	Mean :101.38	Mean : 91.50	Mean : 87.51	Mean : 73.51	Mean :0	Mean :523.6	Mean :5622	Mean :2137	Mean :0	Mean :3.146	Mean :38.2	Mean :2	Mean :0	Mean :4.3721	Mean :48.47	Mean :20.57	Mean :0	Mean :5.902	Mean :68.06	Mean :43.11	Mean :3830368
3rd Qu.:12098	3rd Qu.:12406	3rd Qu.:10821	3rd Qu.:12013	3rd Qu.: 6200	3rd Qu.:3301	3rd Qu.:5682	3rd Qu.:3543	3rd Qu.:51.30	3rd Qu.:26.69	3rd Qu.:52.59	3rd Qu.:29.54	3rd Qu.: 11.000	3rd Qu.:11.00	3rd Qu.:10.000	3rd Qu.: 85.00	3rd Qu.: 88.00	3rd Qu.: 85.00	3rd Qu.:1.0000	3rd Qu.:1.0000	3rd Qu.:1.000	3rd Qu.:109.24	3rd Qu.:108.74	3rd Qu.:107.99	3rd Qu.:109.30	3rd Qu.:116.60	3rd Qu.:114.92	3rd Qu.:124.16	3rd Qu.:123.7	3rd Qu.:102.04	3rd Qu.: 92.36	3rd Qu.: 89.21	3rd Qu.: 74.45	3rd Qu.:0	3rd Qu.:553.0	3rd Qu.:5693	3rd Qu.:2172	3rd Qu.:0	3rd Qu.:3.000	3rd Qu.:38.0	3rd Qu.:2	3rd Qu.:0	3rd Qu.:4.6784	3rd Qu.:50.19	3rd Qu.:21.17	3rd Qu.:0	3rd Qu.:6.274	3rd Qu.:70.02	3rd Qu.:44.23	3rd Qu.:3957600
Max. :18242	Max. :15185	Max. :13802	Max. :14435	Max. :12387	Max. :7589	Max. :7392	Max. :5419	Max. :71.88	Max. :60.94	Max. :56.05	Max. :43.43	Max. :113.000	Max. :68.00	Max. :42.000	Max. :166.00	Max. :286.00	Max. :166.00	Max. :3.0000	Max. :3.0000	Max. :3.000	Max. :120.19	Max. :120.16	Max. :126.92	Max. :168.88	Max. :137.88	Max. :137.78	Max. :154.44	Max. :142.6	Max. :113.23	Max. :109.29	Max. :115.93	Max. :273.55	Max. :0	Max. :698.0	Max. :6523	Max. :2509	Max. :0	Max. :4.000	Max. :45.0	Max. :2	Max. :0	Max. :6.2855	Max. :58.09	Max. :23.54	Max. :0	Max. :8.337	Max. :77.84	Max. :49.15	Max. :5166199
Frameshift 1%
Prokka gene count	Bakta gene count	PGAP gene count	EggNOG-mapper gene count	Prokka undescribed genes	Bakta undescribed genes	PGAP undescribed genes	EggNOG-mapper undescribed genes	Prokka undescribed genes [%]	Bakta undescribed genes [%]	PGAP undescribed genes [%]	EggNOG-mapper undescribed genes [%]	Prokka rRNA	Bakta rRNA	PGAP rRNA	Prokka tRNA	Bakta tRNA	PGAP tRNA	Prokka tmRNA	Bakta tmRNA	PGAP tmRNA	Prokka All Feature lenght	Bakta All Feature lenght	PGAP All Feature lenght	EggNOG-mapper All Feature lenght	Prokka Described Feature lenght	Bakta Described Feature lenght	PGAP Described Feature lenght	EggNOG-mapper Described Feature lenght	Prokka undescribed Feature lenght	Bakta undescribed Feature lenght	PGAP undescribed Feature lenght	EggNOG-mapper undescribed Feature lenght	Prokka GO Coverage	Bakta GO Coverage	EggNOG-mapper GO Coverage	PGAP GO Coverage	Prokka GO Richness	Bakta GO Richness	EggNOG-mapper GO Richness	PGAP GO Richness	Prokka GO Coverage [%]	Bakta GO Coverage [%]	EggNOG-mapper GO Coverage [%]	PGAP GO Coverage [%]	Prokka GO Coverage in nonundescribed Features [%]	Bakta GO Coverage in nonundescribed Features [%]	EggNOG-mapper GO Coverage in nonundescribed Features [%]	PGAP GO Coverage in nonundescribed Features [%]	Prokka Total Coding Space
Min. : 6736	Min. : 6903	Min. : 6105	Min. : 6695	Min. : 4179	Min. : 3194	Min. :3337	Min. :2834	Min. :55.29	Min. :38.05	Min. :53.99	Min. :37.19	Min. : 0.000	Min. : 0.000	Min. : 0.000	Min. : 16.00	Min. : 18.00	Min. : 16.00	Min. :0.0000	Min. :0.0000	Min. :0.000	Min. : 75.67	Min. : 81.26	Min. : 79.53	Min. : 81.31	Min. : 87.13	Min. : 88.51	Min. : 91.43	Min. : 94.57	Min. : 71.69	Min. : 75.88	Min. :71.57	Min. : 64.30	Min. :0	Min. : 15.0	Min. :2048	Min. :1212	Min. :0	Min. :2.000	Min. :37.00	Min. :2	Min. :0	Min. :0.1464	Min. :15.77	Min. :14.80	Min. :0	Min. :0.4689	Min. :28.58	Min. :38.48	Min. :1812581
1st Qu.:11336	1st Qu.:11608	1st Qu.:10968	1st Qu.:11270	1st Qu.: 6854	1st Qu.: 5062	1st Qu.:6078	1st Qu.:4679	1st Qu.:60.24	1st Qu.:43.47	1st Qu.:55.30	1st Qu.:41.42	1st Qu.: 5.000	1st Qu.: 4.000	1st Qu.: 4.000	1st Qu.: 72.00	1st Qu.: 77.00	1st Qu.: 72.00	1st Qu.:1.0000	1st Qu.:1.0000	1st Qu.:1.000	1st Qu.: 90.99	1st Qu.: 90.71	1st Qu.: 85.12	1st Qu.: 91.11	1st Qu.: 93.23	1st Qu.: 93.34	1st Qu.: 98.75	1st Qu.:104.49	1st Qu.: 89.45	1st Qu.: 87.47	1st Qu.:75.29	1st Qu.: 73.09	1st Qu.:0	1st Qu.:174.0	1st Qu.:4371	1st Qu.:2199	1st Qu.:0	1st Qu.:3.000	1st Qu.:38.00	1st Qu.:2	1st Qu.:0	1st Qu.:1.4177	1st Qu.:36.44	1st Qu.:19.09	1st Qu.:0	1st Qu.:2.5832	1st Qu.:64.12	1st Qu.:43.12	1st Qu.:3155916
Median :11823	Median :12089	Median :11397	Median :11747	Median : 7268	Median : 5374	Median :6333	Median :4985	Median :61.52	Median :44.42	Median :55.58	Median :42.43	Median : 8.000	Median : 8.000	Median : 8.000	Median : 78.00	Median : 82.00	Median : 78.00	Median :1.0000	Median :1.0000	Median :1.000	Median : 91.95	Median : 91.65	Median : 85.82	Median : 92.07	Median : 94.39	Median : 94.13	Median :100.00	Median :105.14	Median : 90.38	Median : 88.67	Median :76.14	Median : 74.25	Median :0	Median :188.0	Median :4461	Median :2237	Median :0	Median :3.000	Median :38.00	Median :2	Median :0	Median :1.5451	Median :37.81	Median :19.65	Median :0	Median :2.7860	Median :65.81	Median :44.23	Median :3279609
Mean :11857	Mean :12115	Mean :11443	Mean :11771	Mean : 7297	Mean : 5395	Mean :6363	Mean :5011	Mean :61.45	Mean :44.47	Mean :55.59	Mean :42.49	Mean : 9.488	Mean : 9.397	Mean : 8.648	Mean : 77.21	Mean : 82.03	Mean : 77.21	Mean :0.8969	Mean :0.8977	Mean :1.003	Mean : 91.90	Mean : 91.61	Mean : 85.82	Mean : 92.10	Mean : 94.38	Mean : 94.16	Mean :100.01	Mean :105.20	Mean : 90.33	Mean : 88.60	Mean :76.14	Mean : 74.36	Mean :0	Mean :187.7	Mean :4453	Mean :2239	Mean :0	Mean :3.083	Mean :38.19	Mean :2	Mean :0	Mean :1.5554	Mean :37.94	Mean :19.61	Mean :0	Mean :2.7961	Mean :65.95	Mean :44.15	Mean :3282602
3rd Qu.:12345	3rd Qu.:12609	3rd Qu.:11872	3rd Qu.:12257	3rd Qu.: 7707	3rd Qu.: 5702	3rd Qu.:6620	3rd Qu.:5317	3rd Qu.:62.69	3rd Qu.:45.38	3rd Qu.:55.86	3rd Qu.:43.50	3rd Qu.: 11.000	3rd Qu.:11.000	3rd Qu.:10.000	3rd Qu.: 83.00	3rd Qu.: 88.00	3rd Qu.: 83.00	3rd Qu.:1.0000	3rd Qu.:1.0000	3rd Qu.:1.000	3rd Qu.: 92.89	3rd Qu.: 92.55	3rd Qu.: 86.52	3rd Qu.: 93.02	3rd Qu.: 95.56	3rd Qu.: 94.93	3rd Qu.:101.26	3rd Qu.:105.85	3rd Qu.: 91.31	3rd Qu.: 89.84	3rd Qu.:76.94	3rd Qu.: 75.40	3rd Qu.:0	3rd Qu.:201.0	3rd Qu.:4545	3rd Qu.:2277	3rd Qu.:0	3rd Qu.:3.000	3rd Qu.:38.00	3rd Qu.:2	3rd Qu.:0	3rd Qu.:1.6824	3rd Qu.:39.36	3rd Qu.:20.16	3rd Qu.:0	3rd Qu.:2.9970	3rd Qu.:67.70	3rd Qu.:45.24	3rd Qu.:3403992
Max. :21992	Max. :15540	Max. :14899	Max. :15161	Max. :17161	Max. :10266	Max. :8383	Max. :7394	Max. :80.49	Max. :78.18	Max. :62.98	Max. :59.97	Max. :113.000	Max. :68.000	Max. :42.000	Max. :162.00	Max. :285.00	Max. :162.00	Max. :3.0000	Max. :3.0000	Max. :3.000	Max. :108.17	Max. :107.93	Max. :110.63	Max. :145.39	Max. :118.85	Max. :115.25	Max. :133.33	Max. :130.98	Max. :105.57	Max. :106.02	Max. :98.94	Max. :187.63	Max. :0	Max. :262.0	Max. :5189	Max. :2640	Max. :0	Max. :4.000	Max. :45.00	Max. :2	Max. :0	Max. :2.4738	Max. :45.91	Max. :22.49	Max. :0	Max. :4.2034	Max. :74.71	Max. :50.45	Max. :5132503
Frameshift 2%
Prokka gene count	Bakta gene count	PGAP gene count	EggNOG-mapper gene count	Prokka undescribed genes	Bakta undescribed genes	PGAP undescribed genes	EggNOG-mapper undescribed genes	Prokka undescribed genes [%]	Bakta undescribed genes [%]	PGAP undescribed genes [%]	EggNOG-mapper undescribed genes [%]	Prokka rRNA	Bakta rRNA	PGAP rRNA	Prokka tRNA	Bakta tRNA	PGAP tRNA	Prokka tmRNA	Bakta tmRNA	PGAP tmRNA	Prokka All Feature lenght	Bakta All Feature lenght	PGAP All Feature lenght	EggNOG-mapper All Feature lenght	Prokka Described Feature lenght	Bakta Described Feature lenght	PGAP Described Feature lenght	EggNOG-mapper Described Feature lenght	Prokka undescribed Feature lenght	Bakta undescribed Feature lenght	PGAP undescribed Feature lenght	EggNOG-mapper undescribed Feature lenght	Prokka GO Coverage	Bakta GO Coverage	EggNOG-mapper GO Coverage	PGAP GO Coverage	Prokka GO Richness	Bakta GO Richness	EggNOG-mapper GO Richness	PGAP GO Richness	Prokka GO Coverage [%]	Bakta GO Coverage [%]	EggNOG-mapper GO Coverage [%]	PGAP GO Coverage [%]	Prokka GO Coverage in nonundescribed Features [%]	Bakta GO Coverage in nonundescribed Features [%]	EggNOG-mapper GO Coverage in nonundescribed Features [%]	PGAP GO Coverage in nonundescribed Features [%]	Prokka Total Coding Space
Min. : 3836	Min. : 4110	Min. : 6149	Min. : 3767	Min. : 3041	Min. : 2987	Min. :3500	Min. :2731	Min. :68.47	Min. :52.15	Min. :56.56	Min. :52.16	Min. : 0.000	Min. : 0.000	Min. : 0.000	Min. : 16.00	Min. : 18.00	Min. : 16.00	Min. :0.0000	Min. :0.000	Min. :0.000	Min. : 68.45	Min. : 68.13	Min. : 68.16	Min. : 68.48	Min. : 75.64	Min. : 75.77	Min. : 73.50	Min. : 83.56	Min. : 65.56	Min. : 66.01	Min. : 66.47	Min. : 60.49	Min. :0	Min. : 4.00	Min. : 600	Min. :1182	Min. :0	Min. :1.000	Min. :33.00	Min. :2	Min. :0	Min. :0.03427	Min. :10.48	Min. :10.56	Min. :0	Min. :0.3556	Min. :29.17	Min. :39.65	Min. : 936566
1st Qu.: 7498	1st Qu.: 7734	1st Qu.:11115	1st Qu.: 7432	1st Qu.: 5734	1st Qu.: 5420	1st Qu.:6478	1st Qu.:4750	1st Qu.:74.45	1st Qu.:68.03	1st Qu.:58.16	1st Qu.:60.14	1st Qu.: 4.000	1st Qu.: 4.000	1st Qu.: 4.000	1st Qu.: 68.00	1st Qu.: 76.00	1st Qu.: 68.00	1st Qu.:0.0000	1st Qu.:0.000	1st Qu.:1.000	1st Qu.: 83.21	1st Qu.: 83.02	1st Qu.: 76.85	1st Qu.: 83.31	1st Qu.: 88.48	1st Qu.: 85.04	1st Qu.: 88.48	1st Qu.:103.20	1st Qu.: 82.32	1st Qu.: 82.75	1st Qu.: 71.31	1st Qu.: 74.85	1st Qu.:0	1st Qu.:27.00	1st Qu.:1898	1st Qu.:2159	1st Qu.:0	1st Qu.:2.000	1st Qu.:37.00	1st Qu.:2	1st Qu.:0	1st Qu.:0.31672	1st Qu.:20.45	1st Qu.:18.52	1st Qu.:0	1st Qu.:1.1214	1st Qu.:65.34	1st Qu.:44.70	1st Qu.:2007579
Median : 8678	Median : 8899	Median :11526	Median : 8599	Median : 6522	Median : 6173	Median :6732	Median :5355	Median :76.14	Median :70.34	Median :58.42	Median :62.93	Median : 7.000	Median : 8.000	Median : 7.000	Median : 75.00	Median : 81.00	Median : 75.00	Median :1.0000	Median :1.000	Median :1.000	Median : 88.04	Median : 87.85	Median : 77.37	Median : 88.21	Median : 92.84	Median : 88.41	Median : 89.58	Median :105.41	Median : 86.55	Median : 87.65	Median : 71.91	Median : 78.10	Median :0	Median :34.00	Median :2146	Median :2194	Median :0	Median :2.000	Median :38.00	Median :2	Median :0	Median :0.39160	Median :24.52	Median :19.04	Median :0	Median :1.3518	Median :67.11	Median :45.78	Median :2347175
Mean : 8559	Mean : 8766	Mean :11582	Mean : 8464	Mean : 6561	Mean : 6233	Mean :6769	Mean :5474	Mean :76.91	Mean :71.25	Mean :58.43	Mean :65.10	Mean : 8.716	Mean : 9.173	Mean : 8.488	Mean : 73.92	Mean : 81.35	Mean : 73.92	Mean :0.7075	Mean :0.711	Mean :1.003	Mean : 86.52	Mean : 86.27	Mean : 77.39	Mean : 86.74	Mean : 92.22	Mean : 88.09	Mean : 89.59	Mean :105.48	Mean : 84.98	Mean : 85.90	Mean : 71.92	Mean : 77.26	Mean :0	Mean :34.64	Mean :2004	Mean :2197	Mean :0	Mean :2.153	Mean :37.75	Mean :2	Mean :0	Mean :0.40209	Mean :23.45	Mean :19.01	Mean :0	Mean :1.4080	Mean :67.19	Mean :45.71	Mean :2241514
3rd Qu.: 9719	3rd Qu.: 9924	3rd Qu.:11991	3rd Qu.: 9634	3rd Qu.: 7361	3rd Qu.: 7006	3rd Qu.:7023	3rd Qu.:6098	3rd Qu.:78.45	3rd Qu.:74.52	3rd Qu.:58.69	3rd Qu.:68.84	3rd Qu.: 10.000	3rd Qu.:10.000	3rd Qu.:10.000	3rd Qu.: 80.00	3rd Qu.: 87.00	3rd Qu.: 80.00	3rd Qu.:1.0000	3rd Qu.:1.000	3rd Qu.:1.000	3rd Qu.: 90.89	3rd Qu.: 90.63	3rd Qu.: 77.91	3rd Qu.: 91.05	3rd Qu.: 95.46	3rd Qu.: 90.61	3rd Qu.: 90.67	3rd Qu.:107.28	3rd Qu.: 89.62	3rd Qu.: 90.85	3rd Qu.: 72.50	3rd Qu.: 81.39	3rd Qu.:0	3rd Qu.:41.00	3rd Qu.:2337	3rd Qu.:2233	3rd Qu.:0	3rd Qu.:2.000	3rd Qu.:38.00	3rd Qu.:2	3rd Qu.:0	3rd Qu.:0.47480	3rd Qu.:26.82	3rd Qu.:19.53	3rd Qu.:0	3rd Qu.:1.6278	3rd Qu.:69.02	3rd Qu.:46.84	3rd Qu.:2562847
Max. :23489	Max. :13182	Max. :15062	Max. :12871	Max. :20294	Max. :10547	Max. :9347	Max. :9067	Max. :89.14	Max. :90.36	Max. :73.37	Max. :84.34	Max. :112.000	Max. :68.000	Max. :42.000	Max. :151.00	Max. :284.00	Max. :151.00	Max. :3.0000	Max. :3.000	Max. :3.000	Max. :117.97	Max. :119.22	Max. :111.61	Max. :152.80	Max. :123.62	Max. :111.00	Max. :131.46	Max. :142.89	Max. :117.23	Max. :119.97	Max. :106.27	Max. :179.83	Max. :0	Max. :99.00	Max. :3096	Max. :2540	Max. :0	Max. :5.000	Max. :44.00	Max. :2	Max. :0	Max. :1.20347	Max. :35.83	Max. :21.32	Max. :0	Max. :5.0978	Max. :77.74	Max. :52.98	Max. :4951385
Bacteria Kingdom
Frameshift 0.5%
Prokka gene count	Bakta gene count	PGAP gene count	EggNOG-mapper gene count	Prokka undescribed genes	Bakta undescribed genes	PGAP undescribed genes	EggNOG-mapper undescribed genes	Prokka undescribed genes [%]	Bakta undescribed genes [%]	PGAP undescribed genes [%]	EggNOG-mapper undescribed genes [%]	Prokka rRNA	Bakta rRNA	PGAP rRNA	Prokka tRNA	Bakta tRNA	PGAP tRNA	Prokka tmRNA	Bakta tmRNA	PGAP tmRNA	Prokka All Feature lenght	Bakta All Feature lenght	PGAP All Feature lenght	EggNOG-mapper All Feature lenght	Prokka Described Feature lenght	Bakta Described Feature lenght	PGAP Described Feature lenght	EggNOG-mapper Described Feature lenght	Prokka undescribed Feature lenght	Bakta undescribed Feature lenght	PGAP undescribed Feature lenght	EggNOG-mapper undescribed Feature lenght	Prokka GO Coverage	Bakta GO Coverage	EggNOG-mapper GO Coverage	PGAP GO Coverage	Prokka GO Richness	Bakta GO Richness	EggNOG-mapper GO Richness	PGAP GO Richness	Prokka GO Coverage [%]	Bakta GO Coverage [%]	EggNOG-mapper GO Coverage [%]	PGAP GO Coverage [%]	Prokka GO Coverage in nonundescribed Features [%]	Bakta GO Coverage in nonundescribed Features [%]	EggNOG-mapper GO Coverage in nonundescribed Features [%]	PGAP GO Coverage in nonundescribed Features [%]	Prokka Total Coding Space
Min. : 349	Min. : 350	Min. : 375	Min. : 343	Min. : 224	Min. : 257	Min. : 244	Min. : 204	Min. :29.91	Min. :27.73	Min. :51.13	Min. :23.42	Min. : 0.000	Min. : 0.0	Min. : 0.000	Min. : 3.00	Min. : 4.00	Min. : 3.00	Min. :0.0000	Min. :0.0000	Min. :0.000	Min. : 70.08	Min. : 70.07	Min. : 81.51	Min. : 70.11	Min. : 78.47	Min. : 77.61	Min. : 92.93	Min. : 92.14	Min. : 61.21	Min. : 65.65	Min. : 70.46	Min. : 51.44	Min. :0	Min. : 0.00	Min. : 8.0	Min. : 87	Min. :0	Min. :0	Min. :11.00	Min. :1.000	Min. :0	Min. :0.00000	Min. : 0.846	Min. : 6.782	Min. :0	Min. : 0.0000	Min. : 1.548	Min. :23.68	Min. : 80354
1st Qu.: 6408	1st Qu.: 6429	1st Qu.: 6023	1st Qu.: 6363	1st Qu.: 4907	1st Qu.: 4686	1st Qu.: 3525	1st Qu.: 2685	1st Qu.:73.72	1st Qu.:70.41	1st Qu.:56.36	1st Qu.:38.67	1st Qu.: 3.000	1st Qu.: 3.0	1st Qu.: 3.000	1st Qu.: 44.00	1st Qu.: 46.00	1st Qu.: 44.00	1st Qu.:1.0000	1st Qu.:1.0000	1st Qu.:1.000	1st Qu.:102.71	1st Qu.:102.76	1st Qu.:106.93	1st Qu.:102.88	1st Qu.:125.25	1st Qu.:134.63	1st Qu.:127.95	1st Qu.:122.70	1st Qu.: 95.20	1st Qu.: 90.18	1st Qu.: 93.89	1st Qu.: 74.61	1st Qu.:0	1st Qu.: 6.00	1st Qu.: 320.0	1st Qu.: 959	1st Qu.:0	1st Qu.:2.000	1st Qu.:36.00	1st Qu.:2.000	1st Qu.:0	1st Qu.:0.06668	1st Qu.: 3.427	1st Qu.:13.443	1st Qu.:0	1st Qu.: 0.2788	1st Qu.: 6.646	1st Qu.:33.24	1st Qu.: 2168035
Median : 8726	Median : 8751	Median : 8147	Median : 8674	Median : 6677	Median : 6229	Median : 4705	Median : 3603	Median :79.74	Median :73.94	Median :58.24	Median :43.23	Median : 4.000	Median : 4.0	Median : 4.000	Median : 49.00	Median : 51.00	Median : 49.00	Median :1.0000	Median :1.0000	Median :1.000	Median :115.22	Median :115.25	Median :116.31	Median :115.35	Median :137.88	Median :147.23	Median :140.70	Median :137.99	Median :108.98	Median :104.63	Median :101.12	Median : 83.07	Median :0	Median : 11.00	Median : 678.0	Median :1243	Median :0	Median :2.000	Median :40.00	Median :2.000	Median :0	Median :0.13280	Median : 6.888	Median :15.528	Median :0	Median : 0.5124	Median :12.761	Median :37.16	Median : 3005532
Mean : 9298	Mean : 9328	Mean : 8731	Mean : 9246	Mean : 7356	Mean : 6799	Mean : 5112	Mean : 4070	Mean :77.97	Mean :72.96	Mean :58.70	Mean :43.91	Mean : 6.506	Mean : 6.6	Mean : 6.321	Mean : 52.95	Mean : 55.11	Mean : 52.95	Mean :0.8482	Mean :0.8861	Mean :1.006	Mean :114.96	Mean :115.00	Mean :119.79	Mean :115.13	Mean :137.44	Mean :146.16	Mean :145.59	Mean :140.12	Mean :108.60	Mean :104.17	Mean :103.35	Mean : 83.13	Mean :0	Mean : 22.01	Mean : 806.4	Mean :1294	Mean :0	Mean :2.862	Mean :40.62	Mean :2.008	Mean :0	Mean :0.27267	Mean : 9.126	Mean :15.508	Mean :0	Mean : 0.9309	Mean :15.715	Mean :37.53	Mean : 3274371
3rd Qu.:11460	3rd Qu.:11501	3rd Qu.:10593	3rd Qu.:11395	3rd Qu.: 9033	3rd Qu.: 8294	3rd Qu.: 6162	3rd Qu.: 4970	3rd Qu.:83.42	3rd Qu.:76.94	3rd Qu.:60.35	3rd Qu.:47.71	3rd Qu.: 8.000	3rd Qu.: 8.0	3rd Qu.: 7.000	3rd Qu.: 59.00	3rd Qu.: 62.00	3rd Qu.: 59.00	3rd Qu.:1.0000	3rd Qu.:1.0000	3rd Qu.:1.000	3rd Qu.:126.69	3rd Qu.:126.72	3rd Qu.:130.24	3rd Qu.:126.84	3rd Qu.:148.80	3rd Qu.:157.21	3rd Qu.:160.04	3rd Qu.:155.64	3rd Qu.:121.58	3rd Qu.:117.16	3rd Qu.:110.84	3rd Qu.: 90.89	3rd Qu.:0	3rd Qu.: 26.00	3rd Qu.:1068.0	3rd Qu.:1594	3rd Qu.:0	3rd Qu.:4.000	3rd Qu.:46.00	3rd Qu.:2.000	3rd Qu.:0	3rd Qu.:0.28990	3rd Qu.:13.030	3rd Qu.:17.137	3rd Qu.:0	3rd Qu.: 1.0062	3rd Qu.:22.411	3rd Qu.:40.92	3rd Qu.: 3962011
Max. :28459	Max. :28432	Max. :27976	Max. :28372	Max. :26499	Max. :26983	Max. :19686	Max. :19986	Max. :96.43	Max. :95.04	Max. :89.08	Max. :94.87	Max. :134.000	Max. :108.0	Max. :108.000	Max. :216.00	Max. :221.00	Max. :216.00	Max. :5.0000	Max. :6.0000	Max. :5.000	Max. :162.92	Max. :163.12	Max. :214.38	Max. :163.38	Max. :179.76	Max. :192.95	Max. :269.17	Max. :220.20	Max. :160.61	Max. :158.05	Max. :177.13	Max. :136.25	Max. :0	Max. :715.00	Max. :5285.0	Max. :3307	Max. :0	Max. :7.000	Max. :61.00	Max. :3.000	Max. :0	Max. :8.49614	Max. :63.535	Max. :37.851	Max. :0	Max. :48.9540	Max. :84.465	Max. :86.12	Max. :12649703
Frameshift 1%
Prokka gene count	Bakta gene count	PGAP gene count	EggNOG-mapper gene count	Prokka undescribed genes	Bakta undescribed genes	PGAP undescribed genes	EggNOG-mapper undescribed genes	Prokka undescribed genes [%]	Bakta undescribed genes [%]	PGAP undescribed genes [%]	EggNOG-mapper undescribed genes [%]	Prokka rRNA	Bakta rRNA	PGAP rRNA	Prokka tRNA	Bakta tRNA	PGAP tRNA	Prokka tmRNA	Bakta tmRNA	PGAP tmRNA	Prokka All Feature lenght	Bakta All Feature lenght	PGAP All Feature lenght	EggNOG-mapper All Feature lenght	Prokka Described Feature lenght	Bakta Described Feature lenght	PGAP Described Feature lenght	EggNOG-mapper Described Feature lenght	Prokka undescribed Feature lenght	Bakta undescribed Feature lenght	PGAP undescribed Feature lenght	EggNOG-mapper undescribed Feature lenght	Prokka GO Coverage	Bakta GO Coverage	EggNOG-mapper GO Coverage	PGAP GO Coverage	Prokka GO Richness	Bakta GO Richness	EggNOG-mapper GO Richness	PGAP GO Richness	Prokka GO Coverage [%]	Bakta GO Coverage [%]	EggNOG-mapper GO Coverage [%]	PGAP GO Coverage [%]	Prokka GO Coverage in nonundescribed Features [%]	Bakta GO Coverage in nonundescribed Features [%]	EggNOG-mapper GO Coverage in nonundescribed Features [%]	PGAP GO Coverage in nonundescribed Features [%]	Prokka Total Coding Space
Min. : 257	Min. : 261	Min. : 291	Min. : 225	Min. : 165	Min. : 169	Min. : 201	Min. : 121	Min. :42.89	Min. :45.21	Min. :54.90	Min. :36.11	Min. : 0.000	Min. : 0.000	Min. : 0.000	Min. : 3.00	Min. : 4.00	Min. : 3.00	Min. :0.0000	Min. :0.0000	Min. :0.000	Min. : 61.31	Min. : 61.32	Min. : 66.38	Min. : 61.47	Min. : 69.5	Min. : 65.62	Min. : 68.58	Min. : 77.59	Min. : 57.48	Min. : 59.66	Min. : 61.42	Min. : 50.43	Min. :0	Min. : 0.0	Min. : 2.0	Min. : 47.0	Min. :0	Min. :0	Min. :11.00	Min. :1.000	Min. :0	Min. :0.00000	Min. : 0.2506	Min. : 5.502	Min. :0	Min. : 0.0000	Min. : 1.756	Min. :23.74	Min. : 54397
1st Qu.: 6345	1st Qu.: 6364	1st Qu.: 6334	1st Qu.: 6308	1st Qu.: 5336	1st Qu.: 5478	1st Qu.: 4111	1st Qu.: 3408	1st Qu.:81.55	1st Qu.:84.05	1st Qu.:61.66	1st Qu.:50.03	1st Qu.: 3.000	1st Qu.: 3.000	1st Qu.: 3.000	1st Qu.: 43.00	1st Qu.: 45.00	1st Qu.: 43.00	1st Qu.:0.0000	1st Qu.:0.0000	1st Qu.:1.000	1st Qu.: 83.29	1st Qu.: 83.32	1st Qu.: 82.76	1st Qu.: 83.42	1st Qu.: 96.9	1st Qu.:103.16	1st Qu.: 95.39	1st Qu.:100.39	1st Qu.: 80.37	1st Qu.: 79.82	1st Qu.: 77.51	1st Qu.: 69.34	1st Qu.:0	1st Qu.: 4.0	1st Qu.: 278.0	1st Qu.: 857.2	1st Qu.:0	1st Qu.:2.000	1st Qu.:36.00	1st Qu.:2.000	1st Qu.:0	1st Qu.:0.04977	1st Qu.: 3.0310	1st Qu.:11.449	1st Qu.:0	1st Qu.: 0.4040	1st Qu.: 7.669	1st Qu.:34.04	1st Qu.: 1845187
Median : 8708	Median : 8740	Median : 8572	Median : 8668	Median : 7308	Median : 7402	Median : 5487	Median : 4616	Median :86.37	Median :86.69	Median :64.41	Median :54.34	Median : 4.000	Median : 4.000	Median : 4.000	Median : 48.00	Median : 50.00	Median : 48.00	Median :1.0000	Median :1.0000	Median :1.000	Median :100.39	Median :100.44	Median : 96.56	Median :100.55	Median :114.3	Median :118.65	Median :114.35	Median :122.29	Median : 98.06	Median : 97.94	Median : 89.24	Median : 82.23	Median :0	Median : 7.0	Median : 557.0	Median :1120.0	Median :0	Median :2.000	Median :41.00	Median :2.000	Median :0	Median :0.09024	Median : 5.9694	Median :13.384	Median :0	Median : 0.6626	Median :13.471	Median :37.69	Median : 2652133
Mean : 9287	Mean : 9311	Mean : 9174	Mean : 9239	Mean : 7946	Mean : 7978	Mean : 5922	Mean : 5097	Mean :84.69	Mean :85.62	Mean :64.72	Mean :55.29	Mean : 6.367	Mean : 6.553	Mean : 6.294	Mean : 52.01	Mean : 54.85	Mean : 52.01	Mean :0.7317	Mean :0.7653	Mean :1.005	Mean :102.89	Mean :102.92	Mean :103.02	Mean :103.08	Mean :115.7	Mean :120.48	Mean :122.29	Mean :126.61	Mean :100.57	Mean :100.32	Mean : 94.74	Mean : 83.67	Mean :0	Mean : 12.1	Mean : 677.6	Mean :1183.4	Mean :0	Mean :2.422	Mean :41.42	Mean :2.006	Mean :0	Mean :0.15471	Mean : 7.6287	Mean :13.450	Mean :0	Mean : 1.0177	Mean :16.476	Mean :38.05	Mean : 2961550
3rd Qu.:11550	3rd Qu.:11579	3rd Qu.:11190	3rd Qu.:11491	3rd Qu.: 9815	3rd Qu.: 9825	3rd Qu.: 7170	3rd Qu.: 6302	3rd Qu.:88.93	3rd Qu.:88.61	3rd Qu.:67.23	3rd Qu.:59.10	3rd Qu.: 8.000	3rd Qu.: 8.000	3rd Qu.: 7.000	3rd Qu.: 58.00	3rd Qu.: 62.00	3rd Qu.: 58.00	3rd Qu.:1.0000	3rd Qu.:1.0000	3rd Qu.:1.000	3rd Qu.:120.51	3rd Qu.:120.56	3rd Qu.:119.38	3rd Qu.:120.72	3rd Qu.:131.9	3rd Qu.:134.86	3rd Qu.:143.91	3rd Qu.:149.06	3rd Qu.:118.78	3rd Qu.:118.67	3rd Qu.:108.22	3rd Qu.: 95.86	3rd Qu.:0	3rd Qu.: 15.0	3rd Qu.: 892.0	3rd Qu.:1473.8	3rd Qu.:0	3rd Qu.:3.000	3rd Qu.:47.00	3rd Qu.:2.000	3rd Qu.:0	3rd Qu.:0.17553	3rd Qu.:10.8498	3rd Qu.:15.035	3rd Qu.:0	3rd Qu.: 1.1638	3rd Qu.:23.177	3rd Qu.:41.34	3rd Qu.: 3633528
Max. :27995	Max. :27852	Max. :27917	Max. :27779	Max. :26334	Max. :25834	Max. :21466	Max. :20579	Max. :97.82	Max. :97.74	Max. :90.93	Max. :97.24	Max. :134.000	Max. :108.000	Max. :108.000	Max. :212.00	Max. :221.00	Max. :212.00	Max. :5.0000	Max. :3.0000	Max. :5.000	Max. :194.31	Max. :189.78	Max. :227.00	Max. :188.98	Max. :193.9	Max. :190.90	Max. :290.92	Max. :252.37	Max. :194.35	Max. :189.68	Max. :197.63	Max. :154.12	Max. :0	Max. :303.0	Max. :4266.0	Max. :3255.0	Max. :0	Max. :7.000	Max. :62.00	Max. :3.000	Max. :0	Max. :4.86239	Max. :48.7884	Max. :34.820	Max. :0	Max. :39.2593	Max. :80.896	Max. :84.56	Max. :12243353
Frameshift 2%
Prokka gene count	Bakta gene count	PGAP gene count	EggNOG-mapper gene count	Prokka undescribed genes	Bakta undescribed genes	PGAP undescribed genes	EggNOG-mapper undescribed genes	Prokka undescribed genes [%]	Bakta undescribed genes [%]	PGAP undescribed genes [%]	EggNOG-mapper undescribed genes [%]	Prokka rRNA	Bakta rRNA	PGAP rRNA	Prokka tRNA	Bakta tRNA	PGAP tRNA	Prokka tmRNA	Bakta tmRNA	PGAP tmRNA	Prokka All Feature lenght	Bakta All Feature lenght	PGAP All Feature lenght	EggNOG-mapper All Feature lenght	Prokka Described Feature lenght	Bakta Described Feature lenght	PGAP Described Feature lenght	EggNOG-mapper Described Feature lenght	Prokka undescribed Feature lenght	Bakta undescribed Feature lenght	PGAP undescribed Feature lenght	EggNOG-mapper undescribed Feature lenght	Prokka GO Coverage	Bakta GO Coverage	EggNOG-mapper GO Coverage	PGAP GO Coverage	Prokka GO Richness	Bakta GO Richness	EggNOG-mapper GO Richness	PGAP GO Richness	Prokka GO Coverage [%]	Bakta GO Coverage [%]	EggNOG-mapper GO Coverage [%]	PGAP GO Coverage [%]	Prokka GO Coverage in nonundescribed Features [%]	Bakta GO Coverage in nonundescribed Features [%]	EggNOG-mapper GO Coverage in nonundescribed Features [%]	PGAP GO Coverage in nonundescribed Features [%]	Prokka Total Coding Space
Min. : 47	Min. : 59	Min. : 177	Min. : 21	Min. : 43	Min. : 15	Min. : 129	Min. : 14	Min. : 57.44	Min. :25.42	Min. :55.45	Min. :29.89	Min. : 0.000	Min. : 0.000	Min. : 0.000	Min. : 3.00	Min. : 4.00	Min. : 3.00	Min. :0.000	Min. :0.0000	Min. :0.000	Min. : 53.46	Min. : 53.46	Min. : 53.81	Min. : 53.56	Min. : 61.86	Min. : 48.00	Min. : 50.41	Min. : 71.19	Min. : 52.95	Min. : 53.36	Min. : 50.50	Min. : 50.51	Min. :0	Min. : 0.000	Min. : 0.0	Min. : 20	Min. :0	Min. :0	Min. : 0	Min. :1.000	Min. :0	Min. : 0.00000	Min. : 0.000	Min. : 3.258	Min. :0	Min. : 0.0000	Min. : 0.000	Min. :21.77	Min. : 14111
1st Qu.: 4581	1st Qu.: 4615	1st Qu.: 5841	1st Qu.: 4554	1st Qu.: 4212	1st Qu.: 4325	1st Qu.: 4224	1st Qu.: 3262	1st Qu.: 90.36	1st Qu.:92.56	1st Qu.:67.95	1st Qu.:66.47	1st Qu.: 3.000	1st Qu.: 3.000	1st Qu.: 3.000	1st Qu.: 41.00	1st Qu.: 45.00	1st Qu.: 41.00	1st Qu.:0.000	1st Qu.:0.0000	1st Qu.:1.000	1st Qu.: 74.80	1st Qu.: 74.99	1st Qu.: 71.72	1st Qu.: 75.16	1st Qu.: 88.64	1st Qu.: 88.24	1st Qu.: 78.29	1st Qu.: 95.73	1st Qu.: 73.59	1st Qu.: 74.27	1st Qu.: 69.98	1st Qu.: 68.19	1st Qu.:0	1st Qu.: 3.000	1st Qu.: 107.0	1st Qu.: 607	1st Qu.:0	1st Qu.:2.000	1st Qu.:36.00	1st Qu.:2.000	1st Qu.:0	1st Qu.: 0.04720	1st Qu.: 1.875	1st Qu.: 8.769	1st Qu.:0	1st Qu.: 0.9677	1st Qu.: 7.797	1st Qu.:34.26	1st Qu.: 1163798
Median : 6385	Median : 6421	Median : 8018	Median : 6360	Median : 5906	Median : 6045	Median : 5756	Median : 4530	Median : 93.42	Median :94.78	Median :72.20	Median :71.80	Median : 4.000	Median : 4.000	Median : 4.000	Median : 46.00	Median : 50.00	Median : 46.00	Median :1.000	Median :1.0000	Median :1.000	Median : 96.29	Median : 96.22	Median : 91.80	Median : 96.39	Median :113.18	Median :107.65	Median :103.90	Median :125.90	Median : 95.38	Median : 95.98	Median : 88.85	Median : 87.53	Median :0	Median : 5.000	Median : 248.0	Median : 803	Median :0	Median :2.000	Median :41.00	Median :2.000	Median :0	Median : 0.08082	Median : 3.680	Median :10.400	Median :0	Median : 1.5544	Median :13.797	Median :37.88	Median : 1952780
Mean : 7014	Mean : 7038	Mean : 8620	Mean : 6975	Mean : 6519	Mean : 6632	Mean : 6206	Mean : 4987	Mean : 92.24	Mean :93.77	Mean :72.02	Mean :71.90	Mean : 6.033	Mean : 6.425	Mean : 6.204	Mean : 49.36	Mean : 54.08	Mean : 49.36	Mean :0.527	Mean :0.5607	Mean :1.003	Mean :104.16	Mean :104.19	Mean : 99.26	Mean :104.38	Mean :118.33	Mean :114.90	Mean :114.02	Mean :134.83	Mean :103.12	Mean :103.76	Mean : 95.43	Mean : 92.30	Mean :0	Mean : 7.411	Mean : 331.3	Mean : 889	Mean :0	Mean :2.061	Mean :41.36	Mean :2.006	Mean :0	Mean : 0.14114	Mean : 4.894	Mean :10.807	Mean :0	Mean : 2.1404	Mean :16.868	Mean :38.32	Mean : 2353027
3rd Qu.: 8842	3rd Qu.: 8840	3rd Qu.:10680	3rd Qu.: 8784	3rd Qu.: 8208	3rd Qu.: 8346	3rd Qu.: 7623	3rd Qu.: 6225	3rd Qu.: 95.17	3rd Qu.:96.03	3rd Qu.:75.91	3rd Qu.:77.09	3rd Qu.: 7.000	3rd Qu.: 7.000	3rd Qu.: 7.000	3rd Qu.: 55.00	3rd Qu.: 61.00	3rd Qu.: 55.00	3rd Qu.:1.000	3rd Qu.:1.0000	3rd Qu.:1.000	3rd Qu.:130.99	3rd Qu.:130.87	3rd Qu.:122.04	3rd Qu.:131.19	3rd Qu.:144.94	3rd Qu.:137.17	3rd Qu.:143.87	3rd Qu.:168.93	3rd Qu.:130.04	3rd Qu.:130.74	3rd Qu.:116.16	3rd Qu.:113.18	3rd Qu.:0	3rd Qu.: 9.000	3rd Qu.: 441.0	3rd Qu.:1123	3rd Qu.:0	3rd Qu.:2.000	3rd Qu.:47.00	3rd Qu.:2.000	3rd Qu.:0	3rd Qu.: 0.15945	3rd Qu.: 6.865	3rd Qu.:12.473	3rd Qu.:0	3rd Qu.: 2.6936	3rd Qu.:23.917	3rd Qu.:41.66	3rd Qu.: 3114264
Max. :26009	Max. :25506	Max. :25864	Max. :25470	Max. :25220	Max. :25315	Max. :22024	Max. :22942	Max. :100.00	Max. :99.25	Max. :93.19	Max. :99.83	Max. :133.000	Max. :108.000	Max. :108.000	Max. :195.00	Max. :221.00	Max. :195.00	Max. :5.000	Max. :3.0000	Max. :5.000	Max. :220.22	Max. :220.36	Max. :237.82	Max. :211.27	Max. :239.26	Max. :231.13	Max. :295.77	Max. :295.39	Max. :219.88	Max. :220.47	Max. :224.34	Max. :186.67	Max. :0	Max. :108.000	Max. :2622.0	Max. :2678	Max. :0	Max. :6.000	Max. :92.00	Max. :3.000	Max. :0	Max. :10.16949	Max. :48.276	Max. :34.188	Max. :0	Max. :19.7183	Max. :83.500	Max. :80.84	Max. :11580779
																									NA's :1
Archaea Kingdom
Frameshift 0.5%
Prokka gene count	Bakta gene count	PGAP gene count	EggNOG-mapper gene count	Prokka undescribed genes	Bakta undescribed genes	PGAP undescribed genes	EggNOG-mapper undescribed genes	Prokka undescribed genes [%]	Bakta undescribed genes [%]	PGAP undescribed genes [%]	EggNOG-mapper undescribed genes [%]	Prokka rRNA	Bakta rRNA	PGAP rRNA	Prokka tRNA	Bakta tRNA	PGAP tRNA	Prokka tmRNA	Bakta tmRNA	PGAP tmRNA	Prokka All Feature lenght	Bakta All Feature lenght	PGAP All Feature lenght	EggNOG-mapper All Feature lenght	Prokka Described Feature lenght	Bakta Described Feature lenght	PGAP Described Feature lenght	EggNOG-mapper Described Feature lenght	Prokka undescribed Feature lenght	Bakta undescribed Feature lenght	PGAP undescribed Feature lenght	EggNOG-mapper undescribed Feature lenght	Prokka GO Coverage	Bakta GO Coverage	EggNOG-mapper GO Coverage	PGAP GO Coverage	Prokka GO Richness	Bakta GO Richness	EggNOG-mapper GO Richness	PGAP GO Richness	Prokka GO Coverage [%]	Bakta GO Coverage [%]	EggNOG-mapper GO Coverage [%]	PGAP GO Coverage [%]	Prokka GO Coverage in nonundescribed Features [%]	Bakta GO Coverage in nonundescribed Features [%]	EggNOG-mapper GO Coverage in nonundescribed Features [%]	PGAP GO Coverage in nonundescribed Features [%]	Prokka Total Coding Space
Min. : 532	Min. : 556	Min. : 590	Min. : 511	Min. : 439	Min. : 472	Min. : 237.0	Min. : 144	Min. :64.24	Min. :20.51	Min. :16.46	Min. :11.39	Min. : 0.000	Min. : 0.00	Min. : 0.000	Min. :13.00	Min. :14.00	Min. :13.00	Min. :0	Min. :0.00000	Min. :0	Min. : 93.65	Min. : 93.66	Min. :101.0	Min. : 93.62	Min. :135.4	Min. :115.8	Min. :122.1	Min. :118.4	Min. : 88.21	Min. : 93.43	Min. : 90.35	Min. : 69.52	Min. :0	Min. : 0.000	Min. : 2.00	Min. : 91.0	Min. :0	Min. :0	Min. : 7.00	Min. :2	Min. :0	Min. :0.00000	Min. : 0.1361	Min. :11.09	Min. :0	Min. :0.0000	Min. : 0.1936	Min. :20.26	Min. : 401419
1st Qu.:2067	1st Qu.: 2077	1st Qu.:2145	1st Qu.:2034	1st Qu.:1516	1st Qu.:1805	1st Qu.: 579.0	1st Qu.: 549	1st Qu.:72.69	1st Qu.:85.56	1st Qu.:25.65	1st Qu.:24.90	1st Qu.: 3.000	1st Qu.: 3.00	1st Qu.: 3.000	1st Qu.:45.00	1st Qu.:45.00	1st Qu.:45.00	1st Qu.:0	1st Qu.:0.00000	1st Qu.:0	1st Qu.:275.46	1st Qu.:275.47	1st Qu.:278.1	1st Qu.:275.01	1st Qu.:333.2	1st Qu.:302.1	1st Qu.:304.0	1st Qu.:304.3	1st Qu.:251.59	1st Qu.:271.78	1st Qu.:174.67	1st Qu.:169.22	1st Qu.:0	1st Qu.: 3.000	1st Qu.: 21.00	1st Qu.:431.0	1st Qu.:0	1st Qu.:2	1st Qu.:19.00	1st Qu.:2	1st Qu.:0	1st Qu.:0.09569	1st Qu.: 0.5637	1st Qu.:16.78	1st Qu.:0	1st Qu.:0.8451	1st Qu.: 0.7937	1st Qu.:23.75	1st Qu.:1687111
Median :2969	Median : 2980	Median :3047	Median :2923	Median :2219	Median :2622	Median : 875.0	Median : 829	Median :74.61	Median :88.49	Median :28.03	Median :27.49	Median : 4.000	Median : 3.00	Median : 3.000	Median :47.00	Median :47.00	Median :47.00	Median :0	Median :0.00000	Median :0	Median :284.52	Median :284.51	Median :286.7	Median :284.24	Median :348.3	Median :315.7	Median :318.6	Median :319.3	Median :261.01	Median :281.51	Median :184.15	Median :184.46	Median :0	Median : 3.000	Median : 29.00	Median :554.0	Median :0	Median :2	Median :23.00	Median :2	Median :0	Median :0.14361	Median : 0.9633	Median :17.87	Median :0	Median :1.2658	Median : 1.3412	Median :25.44	Median :2402881
Mean :2953	Mean : 2998	Mean :3056	Mean :2911	Mean :2211	Mean :2618	Mean : 901.3	Mean : 851	Mean :74.68	Mean :87.55	Mean :29.50	Mean :29.35	Mean : 4.444	Mean : 4.38	Mean : 4.315	Mean :47.19	Mean :47.29	Mean :47.19	Mean :0	Mean :0.01431	Mean :0	Mean :280.56	Mean :280.64	Mean :282.9	Mean :280.55	Mean :343.9	Mean :311.0	Mean :314.9	Mean :314.9	Mean :258.75	Mean :277.51	Mean :186.68	Mean :193.02	Mean :0	Mean : 4.391	Mean : 84.54	Mean :544.9	Mean :0	Mean :2	Mean :27.83	Mean :2	Mean :0	Mean :0.16335	Mean : 3.9556	Mean :18.37	Mean :0	Mean :1.3736	Mean : 5.7874	Mean :26.14	Mean :2458204
3rd Qu.:3833	3rd Qu.: 3859	3rd Qu.:3950	3rd Qu.:3783	3rd Qu.:2856	3rd Qu.:3416	3rd Qu.:1138.0	3rd Qu.:1073	3rd Qu.:76.20	3rd Qu.:89.84	3rd Qu.:31.11	3rd Qu.:30.50	3rd Qu.: 6.000	3rd Qu.: 5.00	3rd Qu.: 5.000	3rd Qu.:50.00	3rd Qu.:49.00	3rd Qu.:50.00	3rd Qu.:0	3rd Qu.:0.00000	3rd Qu.:0	3rd Qu.:290.91	3rd Qu.:291.02	3rd Qu.:292.9	3rd Qu.:290.91	3rd Qu.:357.9	3rd Qu.:323.4	3rd Qu.:326.4	3rd Qu.:328.2	3rd Qu.:268.94	3rd Qu.:287.95	3rd Qu.:195.02	3rd Qu.:206.42	3rd Qu.:0	3rd Qu.: 5.000	3rd Qu.:155.00	3rd Qu.:666.0	3rd Qu.:0	3rd Qu.:2	3rd Qu.:42.00	3rd Qu.:2	3rd Qu.:0	3rd Qu.:0.19579	3rd Qu.: 8.3871	3rd Qu.:19.76	3rd Qu.:0	3rd Qu.:1.6863	3rd Qu.:12.6627	3rd Qu.:28.03	3rd Qu.:3228191
Max. :5800	Max. :13917	Max. :5544	Max. :5785	Max. :5136	Max. :5705	Max. :3047.0	Max. :2935	Max. :88.55	Max. :98.02	Max. :64.71	Max. :64.29	Max. :17.000	Max. :17.00	Max. :17.000	Max. :74.00	Max. :80.00	Max. :74.00	Max. :0	Max. :1.00000	Max. :0	Max. :367.65	Max. :367.20	Max. :366.7	Max. :372.34	Max. :397.1	Max. :410.3	Max. :383.8	Max. :374.5	Max. :370.35	Max. :359.85	Max. :342.90	Max. :392.54	Max. :0	Max. :17.000	Max. :426.00	Max. :933.0	Max. :0	Max. :2	Max. :97.00	Max. :2	Max. :0	Max. :0.72222	Max. :28.0604	Max. :27.37	Max. :0	Max. :5.3571	Max. :33.5849	Max. :38.02	Max. :4466502
Frameshift 1%
Prokka gene count	Bakta gene count	PGAP gene count	EggNOG-mapper gene count	Prokka undescribed genes	Bakta undescribed genes	PGAP undescribed genes	EggNOG-mapper undescribed genes	Prokka undescribed genes [%]	Bakta undescribed genes [%]	PGAP undescribed genes [%]	EggNOG-mapper undescribed genes [%]	Prokka rRNA	Bakta rRNA	PGAP rRNA	Prokka tRNA	Bakta tRNA	PGAP tRNA	Prokka tmRNA	Bakta tmRNA	PGAP tmRNA	Prokka All Feature lenght	Bakta All Feature lenght	PGAP All Feature lenght	EggNOG-mapper All Feature lenght	Prokka Described Feature lenght	Bakta Described Feature lenght	PGAP Described Feature lenght	EggNOG-mapper Described Feature lenght	Prokka undescribed Feature lenght	Bakta undescribed Feature lenght	PGAP undescribed Feature lenght	EggNOG-mapper undescribed Feature lenght	Prokka GO Coverage	Bakta GO Coverage	EggNOG-mapper GO Coverage	PGAP GO Coverage	Prokka GO Richness	Bakta GO Richness	EggNOG-mapper GO Richness	PGAP GO Richness	Prokka GO Coverage [%]	Bakta GO Coverage [%]	EggNOG-mapper GO Coverage [%]	PGAP GO Coverage [%]	Prokka GO Coverage in nonundescribed Features [%]	Bakta GO Coverage in nonundescribed Features [%]	EggNOG-mapper GO Coverage in nonundescribed Features [%]	PGAP GO Coverage in nonundescribed Features [%]	Prokka Total Coding Space
Min. : 532	Min. : 556	Min. : 590	Min. : 511	Min. : 439	Min. : 472	Min. : 237.0	Min. : 144.0	Min. :64.24	Min. :20.51	Min. :16.46	Min. :11.39	Min. : 0.000	Min. : 0.00	Min. : 0.000	Min. :13.00	Min. :14.00	Min. :13.00	Min. :0	Min. :0.00000	Min. :0	Min. : 77.28	Min. : 77.27	Min. : 78.36	Min. : 77.32	Min. :104.0	Min. : 98.97	Min. : 90.44	Min. : 97.85	Min. : 75.16	Min. : 77.15	Min. : 74.12	Min. : 65.1	Min. :0	Min. : 0.000	Min. : 2.00	Min. : 91.0	Min. :0	Min. :0	Min. : 7.00	Min. :2	Min. :0	Min. :0.00000	Min. : 0.1361	Min. :10.79	Min. :0	Min. :0.0000	Min. : 0.1936	Min. :20.26	Min. : 401419
1st Qu.:2067	1st Qu.: 2077	1st Qu.:2145	1st Qu.:2034	1st Qu.:1516	1st Qu.:1805	1st Qu.: 579.0	1st Qu.: 549.0	1st Qu.:72.69	1st Qu.:85.56	1st Qu.:25.65	1st Qu.:24.90	1st Qu.: 3.000	1st Qu.: 3.00	1st Qu.: 3.000	1st Qu.:45.00	1st Qu.:45.00	1st Qu.:45.00	1st Qu.:0	1st Qu.:0.00000	1st Qu.:0	1st Qu.:275.46	1st Qu.:275.47	1st Qu.:278.09	1st Qu.:275.01	1st Qu.:333.2	1st Qu.:302.05	1st Qu.:304.00	1st Qu.:304.25	1st Qu.:251.59	1st Qu.:271.78	1st Qu.:174.67	1st Qu.:169.2	1st Qu.:0	1st Qu.: 3.000	1st Qu.: 21.00	1st Qu.:431.0	1st Qu.:0	1st Qu.:2	1st Qu.:19.00	1st Qu.:2	1st Qu.:0	1st Qu.:0.09569	1st Qu.: 0.5637	1st Qu.:16.78	1st Qu.:0	1st Qu.:0.8451	1st Qu.: 0.7937	1st Qu.:23.75	1st Qu.:1687111
Median :2969	Median : 2980	Median :3047	Median :2923	Median :2219	Median :2622	Median : 875.0	Median : 829.0	Median :74.61	Median :88.49	Median :28.03	Median :27.49	Median : 4.000	Median : 3.00	Median : 3.000	Median :47.00	Median :47.00	Median :47.00	Median :0	Median :0.00000	Median :0	Median :284.52	Median :284.51	Median :286.68	Median :284.24	Median :348.3	Median :315.72	Median :318.57	Median :319.28	Median :261.01	Median :281.51	Median :184.15	Median :184.5	Median :0	Median : 3.000	Median : 29.00	Median :553.0	Median :0	Median :2	Median :23.00	Median :2	Median :0	Median :0.14361	Median : 0.9633	Median :17.87	Median :0	Median :1.2658	Median : 1.3412	Median :25.44	Median :2402881
Mean :2953	Mean : 2998	Mean :3057	Mean :2910	Mean :2211	Mean :2617	Mean : 902.2	Mean : 851.9	Mean :74.68	Mean :87.55	Mean :29.51	Mean :29.38	Mean : 4.444	Mean : 4.38	Mean : 4.315	Mean :47.19	Mean :47.29	Mean :47.19	Mean :0	Mean :0.01431	Mean :0	Mean :280.52	Mean :280.61	Mean :282.89	Mean :280.52	Mean :343.8	Mean :310.94	Mean :314.88	Mean :314.86	Mean :258.73	Mean :277.47	Mean :186.64	Mean :193.0	Mean :0	Mean : 4.391	Mean : 84.28	Mean :544.7	Mean :0	Mean :2	Mean :27.83	Mean :2	Mean :0	Mean :0.16336	Mean : 3.9518	Mean :18.37	Mean :0	Mean :1.3751	Mean : 5.7863	Mean :26.14	Mean :2457465
3rd Qu.:3833	3rd Qu.: 3859	3rd Qu.:3950	3rd Qu.:3783	3rd Qu.:2856	3rd Qu.:3416	3rd Qu.:1138.0	3rd Qu.:1073.0	3rd Qu.:76.20	3rd Qu.:89.84	3rd Qu.:31.11	3rd Qu.:30.50	3rd Qu.: 6.000	3rd Qu.: 5.00	3rd Qu.: 5.000	3rd Qu.:50.00	3rd Qu.:49.00	3rd Qu.:50.00	3rd Qu.:0	3rd Qu.:0.00000	3rd Qu.:0	3rd Qu.:290.91	3rd Qu.:291.02	3rd Qu.:292.87	3rd Qu.:290.91	3rd Qu.:357.9	3rd Qu.:323.35	3rd Qu.:326.44	3rd Qu.:328.22	3rd Qu.:268.94	3rd Qu.:287.95	3rd Qu.:195.02	3rd Qu.:206.4	3rd Qu.:0	3rd Qu.: 5.000	3rd Qu.:155.00	3rd Qu.:666.0	3rd Qu.:0	3rd Qu.:2	3rd Qu.:42.00	3rd Qu.:2	3rd Qu.:0	3rd Qu.:0.19579	3rd Qu.: 8.3871	3rd Qu.:19.76	3rd Qu.:0	3rd Qu.:1.6863	3rd Qu.:12.6627	3rd Qu.:28.03	3rd Qu.:3228191
Max. :5464	Max. :13917	Max. :5544	Max. :5455	Max. :5064	Max. :5400	Max. :3508.0	Max. :3419.0	Max. :92.68	Max. :98.38	Max. :69.34	Max. :64.29	Max. :17.000	Max. :17.00	Max. :17.000	Max. :74.00	Max. :80.00	Max. :74.00	Max. :0	Max. :1.00000	Max. :0	Max. :367.65	Max. :367.20	Max. :366.73	Max. :372.34	Max. :397.1	Max. :410.29	Max. :383.78	Max. :374.49	Max. :370.35	Max. :359.85	Max. :342.90	Max. :392.5	Max. :0	Max. :17.000	Max. :426.00	Max. :933.0	Max. :0	Max. :2	Max. :97.00	Max. :2	Max. :0	Max. :0.72222	Max. :28.0604	Max. :27.37	Max. :0	Max. :5.3571	Max. :33.5849	Max. :38.02	Max. :4466502
Frameshift 2%
Prokka gene count	Bakta gene count	PGAP gene count	EggNOG-mapper gene count	Prokka undescribed genes	Bakta undescribed genes	PGAP undescribed genes	EggNOG-mapper undescribed genes	Prokka undescribed genes [%]	Bakta undescribed genes [%]	PGAP undescribed genes [%]	EggNOG-mapper undescribed genes [%]	Prokka rRNA	Bakta rRNA	PGAP rRNA	Prokka tRNA	Bakta tRNA	PGAP tRNA	Prokka tmRNA	Bakta tmRNA	PGAP tmRNA	Prokka All Feature lenght	Bakta All Feature lenght	PGAP All Feature lenght	EggNOG-mapper All Feature lenght	Prokka Described Feature lenght	Bakta Described Feature lenght	PGAP Described Feature lenght	EggNOG-mapper Described Feature lenght	Prokka undescribed Feature lenght	Bakta undescribed Feature lenght	PGAP undescribed Feature lenght	EggNOG-mapper undescribed Feature lenght	Prokka GO Coverage	Bakta GO Coverage	EggNOG-mapper GO Coverage	PGAP GO Coverage	Prokka GO Richness	Bakta GO Richness	EggNOG-mapper GO Richness	PGAP GO Richness	Prokka GO Coverage [%]	Bakta GO Coverage [%]	EggNOG-mapper GO Coverage [%]	PGAP GO Coverage [%]	Prokka GO Coverage in nonundescribed Features [%]	Bakta GO Coverage in nonundescribed Features [%]	EggNOG-mapper GO Coverage in nonundescribed Features [%]	PGAP GO Coverage in nonundescribed Features [%]	Prokka Total Coding Space
Min. : 532	Min. : 556	Min. : 590	Min. : 511	Min. : 439	Min. : 472	Min. : 237.0	Min. : 144.0	Min. :64.24	Min. :20.51	Min. :16.46	Min. :11.39	Min. : 0.000	Min. : 0.00	Min. : 0.000	Min. :13.00	Min. :14.00	Min. :13.00	Min. :0	Min. :0.00000	Min. :0	Min. : 70.23	Min. : 70.24	Min. : 67.21	Min. : 70.4	Min. : 94.15	Min. : 71.14	Min. : 72.19	Min. : 93.25	Min. : 69.48	Min. : 70.23	Min. : 66.12	Min. : 63.9	Min. :0	Min. : 0.000	Min. : 2.00	Min. : 91.0	Min. :0	Min. :0	Min. : 7.00	Min. :2	Min. :0	Min. :0.00000	Min. : 0.1361	Min. : 8.595	Min. :0	Min. :0.0000	Min. : 0.1936	Min. :20.26	Min. : 401419
1st Qu.:2067	1st Qu.: 2077	1st Qu.:2145	1st Qu.:2034	1st Qu.:1516	1st Qu.:1805	1st Qu.: 579.0	1st Qu.: 549.0	1st Qu.:72.69	1st Qu.:85.56	1st Qu.:25.65	1st Qu.:24.90	1st Qu.: 3.000	1st Qu.: 3.00	1st Qu.: 3.000	1st Qu.:45.00	1st Qu.:45.00	1st Qu.:45.00	1st Qu.:0	1st Qu.:0.00000	1st Qu.:0	1st Qu.:275.46	1st Qu.:275.47	1st Qu.:278.09	1st Qu.:275.0	1st Qu.:333.24	1st Qu.:302.05	1st Qu.:304.00	1st Qu.:304.25	1st Qu.:251.59	1st Qu.:271.78	1st Qu.:174.67	1st Qu.:169.2	1st Qu.:0	1st Qu.: 3.000	1st Qu.: 21.00	1st Qu.:431.0	1st Qu.:0	1st Qu.:2	1st Qu.:19.00	1st Qu.:2	1st Qu.:0	1st Qu.:0.09569	1st Qu.: 0.5637	1st Qu.:16.779	1st Qu.:0	1st Qu.:0.8451	1st Qu.: 0.7937	1st Qu.:23.75	1st Qu.:1687111
Median :2969	Median : 2980	Median :3047	Median :2923	Median :2219	Median :2622	Median : 875.0	Median : 829.0	Median :74.61	Median :88.49	Median :28.03	Median :27.49	Median : 4.000	Median : 3.00	Median : 3.000	Median :47.00	Median :47.00	Median :47.00	Median :0	Median :0.00000	Median :0	Median :284.52	Median :284.51	Median :286.68	Median :284.2	Median :348.29	Median :315.72	Median :318.57	Median :319.28	Median :261.01	Median :281.51	Median :184.15	Median :184.5	Median :0	Median : 3.000	Median : 29.00	Median :553.0	Median :0	Median :2	Median :23.00	Median :2	Median :0	Median :0.14361	Median : 0.9633	Median :17.873	Median :0	Median :1.2658	Median : 1.3412	Median :25.44	Median :2402881
Mean :2949	Mean : 2994	Mean :3054	Mean :2906	Mean :2208	Mean :2613	Mean : 901.4	Mean : 850.6	Mean :74.69	Mean :87.55	Mean :29.52	Mean :29.41	Mean : 4.444	Mean : 4.38	Mean : 4.315	Mean :47.19	Mean :47.29	Mean :47.19	Mean :0	Mean :0.01431	Mean :0	Mean :280.51	Mean :280.59	Mean :282.87	Mean :280.5	Mean :343.83	Mean :310.88	Mean :314.84	Mean :314.85	Mean :258.72	Mean :277.46	Mean :186.63	Mean :193.0	Mean :0	Mean : 4.391	Mean : 83.97	Mean :544.3	Mean :0	Mean :2	Mean :27.83	Mean :2	Mean :0	Mean :0.16342	Mean : 3.9486	Mean :18.363	Mean :0	Mean :1.3778	Mean : 5.7911	Mean :26.15	Mean :2456384
3rd Qu.:3829	3rd Qu.: 3854	3rd Qu.:3950	3rd Qu.:3779	3rd Qu.:2856	3rd Qu.:3416	3rd Qu.:1138.0	3rd Qu.:1073.0	3rd Qu.:76.20	3rd Qu.:89.84	3rd Qu.:31.11	3rd Qu.:30.50	3rd Qu.: 6.000	3rd Qu.: 5.00	3rd Qu.: 5.000	3rd Qu.:50.00	3rd Qu.:49.00	3rd Qu.:50.00	3rd Qu.:0	3rd Qu.:0.00000	3rd Qu.:0	3rd Qu.:290.91	3rd Qu.:291.02	3rd Qu.:292.87	3rd Qu.:290.9	3rd Qu.:357.90	3rd Qu.:323.35	3rd Qu.:326.44	3rd Qu.:328.22	3rd Qu.:268.94	3rd Qu.:287.95	3rd Qu.:195.02	3rd Qu.:206.4	3rd Qu.:0	3rd Qu.: 5.000	3rd Qu.:153.00	3rd Qu.:666.0	3rd Qu.:0	3rd Qu.:2	3rd Qu.:42.00	3rd Qu.:2	3rd Qu.:0	3rd Qu.:0.19579	3rd Qu.: 8.3871	3rd Qu.:19.761	3rd Qu.:0	3rd Qu.:1.6863	3rd Qu.:12.6627	3rd Qu.:28.03	3rd Qu.:3228191
Max. :5378	Max. :13917	Max. :5544	Max. :5317	Max. :4180	Max. :4772	Max. :3091.0	Max. :2737.0	Max. :96.99	Max. :98.20	Max. :76.34	Max. :77.84	Max. :17.000	Max. :17.00	Max. :17.000	Max. :74.00	Max. :80.00	Max. :74.00	Max. :0	Max. :1.00000	Max. :0	Max. :367.65	Max. :367.20	Max. :366.73	Max. :372.3	Max. :397.12	Max. :410.29	Max. :383.78	Max. :374.49	Max. :370.35	Max. :359.85	Max. :342.90	Max. :392.5	Max. :0	Max. :17.000	Max. :426.00	Max. :933.0	Max. :0	Max. :2	Max. :97.00	Max. :2	Max. :0	Max. :0.72222	Max. :28.0604	Max. :27.371	Max. :0	Max. :5.3571	Max. :33.5849	Max. :38.02	Max. :4466502
[truncated: 3 more columns]

## Sheet: Best performing tool Escherichi
NCBI Accession	Highest Gene Count	Lowest Undescribed Genes Count	Lowest Undescribed Genes [%]	Highest rRNA Count	Highest tRNA Count	Highest tmRNA Count	Highest Total Annotated Coding Space	Highest Described Annotated Coding Space	Lowest Undescribed Coding Space	Highest All Feature Lenght	Highest Described Feature Lenght	Highest Undescribed Feature Lenght	Highest GO coverage	Highest GO coverage [%]	Highest GO coverage in Described Features [%]	Highest Median GO Richness
GCA_000005845.2	PGAP	Bakta	Bakta	Bakta/PGAP/Prokka	Bakta	Bakta/PGAP/Prokka	PGAP	Bakta	Bakta	Prokka	Prokka	Prokka	Bakta	Bakta	EggNOG-Mapper	EggNOG-Mapper
GCA_000005845.2	PGAP	Bakta	Bakta	Bakta/PGAP/Prokka	Bakta	Bakta/PGAP/Prokka	PGAP	Bakta	Bakta	Prokka	Prokka	Prokka	Bakta	Bakta	EggNOG-Mapper	EggNOG-Mapper
GCA_000006665.1	PGAP	Bakta	Bakta	Bakta/PGAP/Prokka	Bakta	Bakta/PGAP/Prokka	PGAP	Bakta	Bakta	PGAP	Prokka	Prokka	Bakta	EggNOG-Mapper	EggNOG-Mapper	EggNOG-Mapper
GCA_000007445.1	PGAP	Bakta	Bakta	Bakta/PGAP/Prokka	Bakta	Bakta/PGAP/Prokka	PGAP	Bakta	Bakta	PGAP	Prokka	Prokka	Bakta	EggNOG-Mapper	EggNOG-Mapper	EggNOG-Mapper
GCA_000008865.2	PGAP	Bakta	Bakta	Bakta/PGAP/Prokka	Bakta	Bakta/PGAP/Prokka	PGAP	Bakta	Bakta	Prokka	Prokka	EggNOG-Mapper	Bakta	EggNOG-Mapper	EggNOG-Mapper	EggNOG-Mapper
GCA_000009565.2	PGAP	Bakta	Bakta	Bakta/PGAP/Prokka	Bakta/PGAP/Prokka	Bakta/PGAP/Prokka	PGAP	Bakta	Bakta	PGAP	Prokka	Prokka	Bakta	EggNOG-Mapper	EggNOG-Mapper	EggNOG-Mapper
GCA_000010245.1	PGAP	Bakta	Bakta	Bakta/PGAP/Prokka	Bakta	Bakta/PGAP/Prokka	PGAP	Bakta	Bakta	Prokka	Prokka	Prokka	Bakta	Bakta	EggNOG-Mapper	EggNOG-Mapper
GCA_000010385.1	PGAP	Bakta	Bakta	Bakta/PGAP/Prokka	Bakta	Bakta/PGAP/Prokka	PGAP	Bakta	Bakta	Prokka	Prokka	Prokka	Bakta	EggNOG-Mapper	EggNOG-Mapper	EggNOG-Mapper
GCA_000010485.1	PGAP	Bakta	Bakta	Bakta/PGAP/Prokka	Bakta	Bakta/PGAP/Prokka	PGAP	Bakta	Bakta	Prokka	Prokka	Bakta	Bakta	EggNOG-Mapper	EggNOG-Mapper	EggNOG-Mapper
GCA_000010745.1	PGAP	Bakta	Bakta	Bakta/PGAP/Prokka	Bakta	Bakta/PGAP/Prokka	PGAP	Bakta	Bakta	PGAP	Prokka	Prokka	Bakta	EggNOG-Mapper	EggNOG-Mapper	EggNOG-Mapper
GCA_000010765.1	PGAP	Bakta	Bakta	Bakta/PGAP/Prokka	Bakta	Bakta/PGAP/Prokka	PGAP	Bakta	Bakta	PGAP	Prokka	Prokka	Bakta	EggNOG-Mapper	EggNOG-Mapper	EggNOG-Mapper
GCA_000013265.1	PGAP	Bakta	Bakta	Bakta/PGAP/Prokka	Bakta/PGAP/Prokka	Bakta/PGAP/Prokka	PGAP	Bakta	Bakta	PGAP	Prokka	Prokka	Bakta	EggNOG-Mapper	EggNOG-Mapper	EggNOG-Mapper
GCA_000013305.1	PGAP	Bakta	Bakta	Bakta/PGAP/Prokka	Bakta/PGAP/Prokka	Bakta/PGAP/Prokka	PGAP	Bakta	Bakta	PGAP	Prokka	Prokka	Bakta	EggNOG-Mapper	EggNOG-Mapper	EggNOG-Mapper
GCA_000014845.1	PGAP	Bakta	Bakta	Bakta/PGAP/Prokka	Bakta	Bakta/PGAP/Prokka	PGAP	Bakta	Bakta	PGAP	Prokka	Prokka	Bakta	EggNOG-Mapper	EggNOG-Mapper	EggNOG-Mapper
GCA_000017745.1	PGAP	Bakta	Bakta	Bakta/PGAP/Prokka	Bakta	Bakta/PGAP/Prokka	PGAP	Bakta	Bakta	PGAP	Prokka	EggNOG-Mapper	Bakta	EggNOG-Mapper	EggNOG-Mapper	EggNOG-Mapper
GCA_000017765.1	PGAP	Bakta	Bakta	Bakta/PGAP/Prokka	Bakta	Bakta/PGAP/Prokka	PGAP	Bakta	Bakta	PGAP	Prokka	Prokka	Bakta	EggNOG-Mapper	EggNOG-Mapper	EggNOG-Mapper
GCA_000017985.1	PGAP	Bakta	Bakta	Bakta/PGAP/Prokka	Bakta	Bakta/PGAP/Prokka	PGAP	Bakta	Bakta	PGAP	Prokka	Prokka	Bakta	EggNOG-Mapper	EggNOG-Mapper	EggNOG-Mapper
GCA_000019385.1	PGAP	Bakta	Bakta	Bakta/PGAP/Prokka	Bakta/PGAP/Prokka	Bakta/PGAP/Prokka	PGAP	Bakta	Bakta	Prokka	Prokka	Prokka	Bakta	EggNOG-Mapper	EggNOG-Mapper	EggNOG-Mapper
GCA_000019425.1	PGAP	Bakta	Bakta	Bakta/PGAP/Prokka	Bakta	Bakta/PGAP/Prokka	PGAP	Bakta	Bakta	PGAP	Prokka	Prokka	Bakta	EggNOG-Mapper	EggNOG-Mapper	EggNOG-Mapper
GCA_000019645.1	PGAP	Bakta	Bakta	Bakta/PGAP/Prokka	Bakta	Bakta/PGAP/Prokka	PGAP	Bakta	Bakta	PGAP	Prokka	Prokka	Bakta	EggNOG-Mapper	EggNOG-Mapper	EggNOG-Mapper
GCA_000021125.1	PGAP	Bakta	Bakta	Bakta/PGAP/Prokka	Bakta	Bakta/PGAP/Prokka	PGAP	Bakta	Bakta	Prokka	Prokka	EggNOG-Mapper	Bakta	EggNOG-Mapper	EggNOG-Mapper	EggNOG-Mapper
GCA_000022225.1	PGAP	Bakta	Bakta	Bakta/PGAP/Prokka	Bakta	Bakta/PGAP/Prokka	PGAP	Bakta	Bakta	Prokka	Prokka	Prokka	Bakta	EggNOG-Mapper	EggNOG-Mapper	EggNOG-Mapper
GCA_000022345.1	PGAP	Bakta	Bakta	Bakta/PGAP/Prokka	Bakta	Bakta/PGAP/Prokka	PGAP	Bakta	Bakta	Prokka	Prokka	Prokka	Bakta	Bakta	EggNOG-Mapper	EggNOG-Mapper
GCA_000022665.2	PGAP	Bakta	Bakta	Bakta/PGAP/Prokka	Bakta/PGAP/Prokka	Bakta/PGAP/Prokka	PGAP	Bakta	Bakta	PGAP	Prokka	Prokka	Bakta	EggNOG-Mapper	EggNOG-Mapper	EggNOG-Mapper
GCA_000023365.1	PGAP	Bakta	Bakta	Bakta/PGAP/Prokka	Bakta	Bakta/PGAP/Prokka	PGAP	Bakta	Bakta	Prokka	Prokka	Prokka	Bakta	EggNOG-Mapper	EggNOG-Mapper	EggNOG-Mapper
GCA_000023665.1	PGAP	Bakta	Bakta	Bakta/PGAP/Prokka	Bakta/PGAP/Prokka	Bakta/PGAP/Prokka	PGAP	Bakta	Bakta	PGAP	Prokka	Prokka	Bakta	EggNOG-Mapper	EggNOG-Mapper	EggNOG-Mapper
GCA_000025165.1	PGAP	Bakta	Bakta	Bakta/PGAP/Prokka	Bakta	Bakta/PGAP/Prokka	PGAP	Bakta	Bakta	Prokka	Prokka	Prokka	Bakta	EggNOG-Mapper	EggNOG-Mapper	EggNOG-Mapper
GCA_000025745.1	PGAP	Bakta	Bakta	Bakta/PGAP/Prokka	Bakta	Bakta/PGAP/Prokka	PGAP	Bakta	Bakta	Prokka	Prokka	Prokka	Bakta	EggNOG-Mapper	EggNOG-Mapper	EggNOG-Mapper
GCA_000026245.1	PGAP	Bakta	Bakta	Bakta/PGAP/Prokka	Bakta	Bakta/PGAP/Prokka	PGAP	Bakta	Bakta	PGAP	Prokka	Prokka	Bakta	EggNOG-Mapper	EggNOG-Mapper	EggNOG-Mapper
GCA_000026265.1	PGAP	Bakta	Bakta	Bakta/PGAP/Prokka	Bakta	Bakta/PGAP/Prokka	PGAP	Bakta	Bakta	Prokka	Prokka	Prokka	Bakta	EggNOG-Mapper	EggNOG-Mapper	EggNOG-Mapper
GCA_000026285.2	PGAP	Bakta	Bakta	Bakta/PGAP/Prokka	Bakta	Bakta/PGAP/Prokka	PGAP	Bakta	Bakta	PGAP	Prokka	EggNOG-Mapper	Bakta	EggNOG-Mapper	EggNOG-Mapper	EggNOG-Mapper
GCA_000026305.1	PGAP	Bakta	Bakta	Bakta/PGAP/Prokka	Bakta	Bakta/PGAP/Prokka	PGAP	Bakta	Bakta	Prokka	Prokka	Prokka	EggNOG-Mapper	EggNOG-Mapper	EggNOG-Mapper	EggNOG-Mapper
GCA_000026325.2	PGAP	Bakta	Bakta	Bakta/PGAP/Prokka	Bakta	Bakta/PGAP/Prokka	PGAP	Bakta	Bakta	Prokka	Prokka	EggNOG-Mapper	Bakta	EggNOG-Mapper	EggNOG-Mapper	EggNOG-Mapper
GCA_000026345.1	PGAP	Bakta	Bakta	Bakta/PGAP/Prokka	Bakta	Bakta/PGAP/Prokka	PGAP	Bakta	Bakta	PGAP	Prokka	Prokka	Bakta	EggNOG-Mapper	EggNOG-Mapper	EggNOG-Mapper
GCA_000026545.1	PGAP	Bakta	Bakta	Bakta/PGAP/Prokka	Bakta	Bakta/PGAP/Prokka	PGAP	Bakta	Bakta	PGAP	Prokka	Prokka	Bakta	EggNOG-Mapper	EggNOG-Mapper	EggNOG-Mapper
GCA_000027125.1	PGAP	Bakta	Bakta	Bakta/PGAP/Prokka	Bakta	Bakta/PGAP/Prokka	PGAP	Bakta	Bakta	Prokka	Prokka	Prokka	Bakta	EggNOG-Mapper	EggNOG-Mapper	EggNOG-Mapper
GCA_000091005.1	PGAP	Bakta	Bakta	Bakta/PGAP/Prokka	Bakta	Bakta/PGAP/Prokka	PGAP	Bakta	Bakta	PGAP	Prokka	Prokka	Bakta	EggNOG-Mapper	EggNOG-Mapper	EggNOG-Mapper
GCA_000146735.1	PGAP	Bakta	Bakta	Prokka	Bakta	Bakta/PGAP/Prokka	PGAP	Bakta	Bakta	EggNOG-Mapper	Prokka	Prokka	Bakta	EggNOG-Mapper	EggNOG-Mapper	EggNOG-Mapper
GCA_000147755.2	PGAP	Bakta	Bakta	Bakta/PGAP/Prokka	Bakta	Bakta/PGAP/Prokka	PGAP	Bakta	Bakta	Prokka	Prokka	EggNOG-Mapper	Bakta	Bakta	EggNOG-Mapper	EggNOG-Mapper
GCA_000148365.1	PGAP	Bakta	Bakta	Bakta/PGAP/Prokka	Bakta/PGAP/Prokka	Bakta/PGAP/Prokka	PGAP	Bakta	Bakta	PGAP	Prokka	Prokka	Bakta	EggNOG-Mapper	EggNOG-Mapper	EggNOG-Mapper
GCA_000148605.1	PGAP	Bakta	Bakta	PGAP	Bakta	Bakta/PGAP/Prokka	PGAP	Bakta	Bakta	PGAP	Prokka	Prokka	Bakta	EggNOG-Mapper	EggNOG-Mapper	EggNOG-Mapper
GCA_000155005.1	PGAP	Bakta	Bakta	Prokka	Bakta	Bakta/PGAP/Prokka	EggNOG-Mapper	Bakta	Bakta	EggNOG-Mapper	EggNOG-Mapper	EggNOG-Mapper	EggNOG-Mapper	EggNOG-Mapper	EggNOG-Mapper	EggNOG-Mapper
GCA_000155125.1	PGAP	Bakta	Bakta	Bakta/PGAP/Prokka	Bakta	Bakta/PGAP/Prokka	PGAP	Bakta	Bakta	Prokka	Prokka	Prokka	Bakta	EggNOG-Mapper	EggNOG-Mapper	EggNOG-Mapper
GCA_000157115.2	PGAP	Bakta	Bakta	Bakta/PGAP/Prokka	Bakta	Bakta/PGAP/Prokka	PGAP	Bakta	Bakta	EggNOG-Mapper	Prokka	Prokka	Bakta	EggNOG-Mapper	EggNOG-Mapper	EggNOG-Mapper
GCA_000158395.1	PGAP	Bakta	Bakta	Bakta/PGAP/Prokka	Bakta/PGAP/Prokka	Bakta/PGAP/Prokka	PGAP	Bakta	Bakta	EggNOG-Mapper	Prokka	EggNOG-Mapper	Bakta	EggNOG-Mapper	EggNOG-Mapper	EggNOG-Mapper
GCA_000159295.1	PGAP	Bakta	Bakta	Bakta/PGAP/Prokka	Bakta	Bakta/PGAP/Prokka	PGAP	Bakta	Bakta	EggNOG-Mapper	Prokka	EggNOG-Mapper	EggNOG-Mapper	EggNOG-Mapper	EggNOG-Mapper	EggNOG-Mapper
GCA_000163155.1	PGAP	Bakta	Bakta	PGAP	Bakta	Bakta/PGAP/Prokka	PGAP	Bakta	Bakta	EggNOG-Mapper	Prokka	EggNOG-Mapper	Bakta	EggNOG-Mapper	EggNOG-Mapper	EggNOG-Mapper
GCA_000163175.1	PGAP	Bakta	Bakta	Bakta/PGAP/Prokka	Bakta	Bakta/PGAP/Prokka	PGAP	Bakta	Bakta	EggNOG-Mapper	Prokka	EggNOG-Mapper	Bakta	EggNOG-Mapper	EggNOG-Mapper	EggNOG-Mapper
GCA_000163195.1	PGAP	Bakta	Bakta	PGAP	Bakta/PGAP/Prokka	Bakta/PGAP/Prokka	PGAP	Bakta	Bakta	EggNOG-Mapper	Prokka	EggNOG-Mapper	Bakta	EggNOG-Mapper	EggNOG-Mapper	EggNOG-Mapper
GCA_000163215.1	PGAP	Bakta	Bakta	PGAP	Bakta	Bakta/PGAP/Prokka	PGAP	Bakta	Bakta	EggNOG-Mapper	Prokka	EggNOG-Mapper	Bakta	EggNOG-Mapper	EggNOG-Mapper	EggNOG-Mapper
GCA_000163235.1	PGAP	Bakta	Bakta	PGAP	Bakta	Bakta/PGAP/Prokka	PGAP	Bakta	Bakta	EggNOG-Mapper	Prokka	EggNOG-Mapper	Bakta	EggNOG-Mapper	EggNOG-Mapper	EggNOG-Mapper
GCA_000164195.1	Bakta	Bakta	Bakta	Bakta/PGAP/Prokka	Bakta	Bakta/PGAP/Prokka	PGAP	Bakta	Bakta	Prokka	Prokka	EggNOG-Mapper	Bakta	EggNOG-Mapper	EggNOG-Mapper	EggNOG-Mapper
GCA_000164215.1	Bakta	Bakta	Bakta	PGAP	Bakta	Bakta/PGAP/Prokka	PGAP	Bakta	Bakta	Prokka	Prokka	EggNOG-Mapper	Bakta	EggNOG-Mapper	EggNOG-Mapper	EggNOG-Mapper
GCA_000164235.1	Bakta	Bakta	Bakta	PGAP	Bakta/PGAP/Prokka	Bakta/PGAP/Prokka	PGAP	Bakta	Bakta	EggNOG-Mapper	Prokka	EggNOG-Mapper	Bakta	EggNOG-Mapper	EggNOG-Mapper	EggNOG-Mapper
GCA_000164255.1	Bakta	Bakta	Bakta	PGAP	Bakta/PGAP/Prokka	Bakta/PGAP/Prokka	PGAP	Bakta	Bakta	Prokka	Prokka	EggNOG-Mapper	Bakta	EggNOG-Mapper	EggNOG-Mapper	EggNOG-Mapper
GCA_000164275.1	Bakta	Bakta	Bakta	Bakta/PGAP/Prokka	Bakta/PGAP/Prokka	Bakta/PGAP/Prokka	PGAP	Bakta	Bakta	Prokka	Prokka	EggNOG-Mapper	Bakta	EggNOG-Mapper	EggNOG-Mapper	EggNOG-Mapper
GCA_000164295.1	PGAP	Bakta	Bakta	Bakta/PGAP/Prokka	Bakta	Bakta/PGAP/Prokka	PGAP	Bakta	Bakta	Prokka	Prokka	EggNOG-Mapper	EggNOG-Mapper	EggNOG-Mapper	EggNOG-Mapper	EggNOG-Mapper
GCA_000164315.1	Bakta	Bakta	Bakta	Bakta/PGAP/Prokka	Bakta	Bakta/PGAP/Prokka	PGAP	Bakta	Bakta	EggNOG-Mapper	Prokka	EggNOG-Mapper	Bakta	EggNOG-Mapper	EggNOG-Mapper	EggNOG-Mapper
GCA_000164335.1	Bakta	Bakta	Bakta	PGAP	Bakta	Bakta/PGAP/Prokka	PGAP	Bakta	Bakta	Prokka	Prokka	EggNOG-Mapper	Bakta	EggNOG-Mapper	EggNOG-Mapper	EggNOG-Mapper
GCA_000164355.1	Bakta	Bakta	Bakta	PGAP	Bakta	Bakta/PGAP/Prokka	PGAP	Bakta	Bakta	Prokka	Prokka	EggNOG-Mapper	EggNOG-Mapper	EggNOG-Mapper	EggNOG-Mapper	EggNOG-Mapper
GCA_000164375.1	Bakta	Bakta	Bakta	PGAP	Bakta	Bakta/PGAP/Prokka	PGAP	Bakta	Bakta	Prokka	Prokka	EggNOG-Mapper	Bakta	EggNOG-Mapper	EggNOG-Mapper	EggNOG-Mapper
GCA_000164415.1	Bakta	Bakta	Bakta	PGAP	Bakta	Bakta/PGAP/Prokka	PGAP	Bakta	Bakta	EggNOG-Mapper	Prokka	EggNOG-Mapper	Bakta/EggNOG-Mapper	EggNOG-Mapper	EggNOG-Mapper	EggNOG-Mapper
GCA_000164435.1	Bakta	Bakta	Bakta	PGAP	Bakta/PGAP/Prokka	Bakta/PGAP/Prokka	PGAP	Bakta	Bakta	Prokka	Prokka	EggNOG-Mapper	EggNOG-Mapper	EggNOG-Mapper	EggNOG-Mapper	EggNOG-Mapper
GCA_000164455.1	Bakta	Bakta	Bakta	PGAP	Bakta	Bakta/PGAP/Prokka	PGAP	Bakta	Bakta	Prokka	Prokka	EggNOG-Mapper	Bakta	EggNOG-Mapper	EggNOG-Mapper	EggNOG-Mapper
GCA_000164475.1	Bakta	Bakta	Bakta	Bakta/PGAP/Prokka	Bakta	Bakta/PGAP/Prokka	PGAP	Bakta	Bakta	Prokka	Prokka	EggNOG-Mapper	Bakta	EggNOG-Mapper	EggNOG-Mapper	EggNOG-Mapper
GCA_000164495.1	Bakta	Bakta	Bakta	Bakta/PGAP/Prokka	Bakta	Bakta/PGAP/Prokka	PGAP	Bakta	Bakta	EggNOG-Mapper	Prokka	EggNOG-Mapper	EggNOG-Mapper	EggNOG-Mapper	EggNOG-Mapper	EggNOG-Mapper
GCA_000164515.1	Bakta	Bakta	Bakta	Bakta/PGAP/Prokka	Bakta	Bakta/PGAP/Prokka	PGAP	Bakta	Bakta	Prokka	Prokka	EggNOG-Mapper	Bakta	EggNOG-Mapper	EggNOG-Mapper	EggNOG-Mapper
GCA_000164535.1	Bakta	Bakta	Bakta	Bakta/PGAP/Prokka	Bakta	Bakta/PGAP/Prokka	PGAP	Bakta	Bakta	Prokka	Prokka	EggNOG-Mapper	EggNOG-Mapper	EggNOG-Mapper	EggNOG-Mapper	EggNOG-Mapper
GCA_000164555.1	Bakta	Bakta	Bakta	PGAP	Bakta	Bakta/PGAP/Prokka	PGAP	PGAP	Bakta	Prokka	Prokka	EggNOG-Mapper	Bakta	EggNOG-Mapper	EggNOG-Mapper	EggNOG-Mapper
GCA_000164575.1	Bakta	Bakta	Bakta	Bakta/PGAP/Prokka	Bakta/PGAP/Prokka	Bakta/PGAP/Prokka	PGAP	Bakta	Bakta	EggNOG-Mapper	Prokka	EggNOG-Mapper	EggNOG-Mapper	EggNOG-Mapper	EggNOG-Mapper	EggNOG-Mapper
GCA_000164595.1	Bakta	Bakta	Bakta	PGAP	Bakta	Bakta/PGAP/Prokka	PGAP	Bakta	Bakta	Prokka	Prokka	EggNOG-Mapper	EggNOG-Mapper	EggNOG-Mapper	EggNOG-Mapper	EggNOG-Mapper
GCA_000164615.1	Bakta	Bakta	Bakta	Bakta/PGAP/Prokka	Bakta	Bakta/PGAP/Prokka	PGAP	Bakta	Bakta	EggNOG-Mapper	Prokka	EggNOG-Mapper	EggNOG-Mapper	EggNOG-Mapper	EggNOG-Mapper	EggNOG-Mapper
GCA_000165655.2	PGAP	Bakta	Bakta	PGAP	Bakta/PGAP/Prokka	Bakta/PGAP/Prokka	PGAP	Bakta	Bakta	PGAP	Prokka	EggNOG-Mapper	EggNOG-Mapper	EggNOG-Mapper	EggNOG-Mapper	EggNOG-Mapper
GCA_000166535.3	PGAP	Bakta	Bakta	Bakta/PGAP/Prokka	Bakta	Bakta/PGAP/Prokka	PGAP	Bakta	Bakta	PGAP	Prokka	EggNOG-Mapper	Bakta	EggNOG-Mapper	EggNOG-Mapper	EggNOG-Mapper
GCA_000166555.2	PGAP	Bakta	Bakta	PGAP	Bakta	Bakta/PGAP/Prokka	PGAP	PGAP	Bakta	Prokka	Prokka	EggNOG-Mapper	Bakta	EggNOG-Mapper	EggNOG-Mapper	EggNOG-Mapper
GCA_000166575.2	PGAP	Bakta	Bakta	PGAP	Bakta	Bakta/PGAP/Prokka	PGAP	Bakta	Bakta	Prokka	Prokka	EggNOG-Mapper	Bakta	EggNOG-Mapper	EggNOG-Mapper	EggNOG-Mapper
GCA_000166595.2	PGAP	Bakta	Bakta	PGAP	Bakta	Bakta/PGAP/Prokka	PGAP	Bakta	Bakta	PGAP	Prokka	EggNOG-Mapper	Bakta	EggNOG-Mapper	EggNOG-Mapper	EggNOG-Mapper
GCA_000166615.2	PGAP	Bakta	Bakta	PGAP	Bakta	Bakta/PGAP/Prokka	PGAP	Bakta	Bakta	Prokka	Prokka	EggNOG-Mapper	Bakta	EggNOG-Mapper	EggNOG-Mapper	EggNOG-Mapper
GCA_000167815.1	PGAP	Bakta	Bakta	PGAP	Bakta/PGAP/Prokka	Bakta/PGAP/Prokka	PGAP	PGAP	Bakta	PGAP	Prokka	EggNOG-Mapper	EggNOG-Mapper	EggNOG-Mapper	EggNOG-Mapper	EggNOG-Mapper
GCA_000167835.1	PGAP	Bakta	Bakta	Bakta/PGAP/Prokka	Bakta	Bakta/PGAP/Prokka	PGAP	Bakta	Bakta	Prokka	Prokka	EggNOG-Mapper	EggNOG-Mapper	EggNOG-Mapper	EggNOG-Mapper	EggNOG-Mapper
GCA_000167855.1	PGAP	Bakta	Bakta	PGAP	Bakta	Bakta/PGAP/Prokka	PGAP	Bakta	Bakta	Prokka	Prokka	EggNOG-Mapper	Bakta	EggNOG-Mapper	EggNOG-Mapper	EggNOG-Mapper
GCA_000167875.2	PGAP	Bakta	Bakta	Bakta/PGAP/Prokka	Bakta	Bakta/PGAP/Prokka	PGAP	Bakta	Bakta	PGAP	Prokka	Prokka	Bakta	EggNOG-Mapper	EggNOG-Mapper	EggNOG-Mapper
GCA_000167895.3	PGAP	Bakta	Bakta	PGAP	Bakta	Bakta/PGAP/Prokka	PGAP	PGAP	Bakta	PGAP	Prokka	EggNOG-Mapper	Bakta	EggNOG-Mapper	EggNOG-Mapper	EggNOG-Mapper
GCA_000167915.2	PGAP	Bakta	Bakta	Bakta/PGAP/Prokka	Bakta	Bakta/PGAP/Prokka	PGAP	Bakta	Bakta	PGAP	Prokka	EggNOG-Mapper	Bakta	EggNOG-Mapper	EggNOG-Mapper	EggNOG-Mapper
GCA_000168095.1	PGAP	Bakta	Bakta	PGAP	Bakta	Bakta/PGAP/Prokka	PGAP	Bakta	Bakta	PGAP	Prokka	EggNOG-Mapper	Bakta	EggNOG-Mapper	EggNOG-Mapper	EggNOG-Mapper
GCA_000171915.1	PGAP	Bakta	Bakta	PGAP	Bakta	Bakta/PGAP/Prokka	PGAP	Bakta	Bakta	Prokka	Prokka	EggNOG-Mapper	Bakta	EggNOG-Mapper	EggNOG-Mapper	EggNOG-Mapper
GCA_000171935.1	PGAP	Bakta	Bakta	PGAP	Bakta	Bakta/PGAP/Prokka	PGAP	PGAP	Bakta	Prokka	Prokka	EggNOG-Mapper	Bakta	EggNOG-Mapper	EggNOG-Mapper	EggNOG-Mapper
GCA_000171955.1	PGAP	Bakta	Bakta	PGAP	Bakta	Bakta/PGAP/Prokka	PGAP	Bakta	Bakta	Prokka	Prokka	EggNOG-Mapper	Bakta	EggNOG-Mapper	EggNOG-Mapper	EggNOG-Mapper
GCA_000171975.1	PGAP	Bakta	Bakta	PGAP	Bakta	Bakta/PGAP/Prokka	PGAP	Bakta	Bakta	Prokka	Prokka	EggNOG-Mapper	Bakta	EggNOG-Mapper	EggNOG-Mapper	EggNOG-Mapper
GCA_000171995.1	PGAP	Bakta	Bakta	PGAP	Bakta	Bakta/PGAP/Prokka	PGAP	Bakta	Bakta	Prokka	Prokka	EggNOG-Mapper	Bakta	EggNOG-Mapper	EggNOG-Mapper	EggNOG-Mapper
GCA_000172015.1	PGAP	Bakta	Bakta	PGAP	Bakta	Bakta/PGAP/Prokka	PGAP	Bakta	Bakta	Prokka	Prokka	EggNOG-Mapper	Bakta	EggNOG-Mapper	EggNOG-Mapper	EggNOG-Mapper
GCA_000172035.1	PGAP	Bakta	Bakta	PGAP	Bakta	Bakta/PGAP/Prokka	PGAP	Bakta	Bakta	Prokka	Prokka	EggNOG-Mapper	Bakta	EggNOG-Mapper	EggNOG-Mapper	EggNOG-Mapper
GCA_000172055.1	PGAP	Bakta	Bakta	PGAP	Bakta	Bakta/PGAP/Prokka	PGAP	PGAP	Bakta	Prokka	Prokka	EggNOG-Mapper	Bakta	EggNOG-Mapper	EggNOG-Mapper	EggNOG-Mapper
GCA_000175735.1	PGAP	Bakta	Bakta	Bakta/PGAP/Prokka	Bakta	Bakta/PGAP/Prokka	PGAP	PGAP	Bakta	Prokka	Prokka	EggNOG-Mapper	Bakta	Bakta	EggNOG-Mapper	EggNOG-Mapper
GCA_000175755.1	PGAP	Bakta	Bakta	Bakta/PGAP/Prokka	Bakta	Bakta/PGAP/Prokka	PGAP	Bakta	Bakta	Prokka	Prokka	EggNOG-Mapper	Bakta	EggNOG-Mapper	EggNOG-Mapper	EggNOG-Mapper
GCA_000176535.2	PGAP	Bakta	Bakta	PGAP	Bakta	Bakta/PGAP/Prokka	PGAP	Bakta	Bakta	EggNOG-Mapper	Prokka	Prokka	Bakta	EggNOG-Mapper	EggNOG-Mapper	EggNOG-Mapper
GCA_000176555.2	PGAP	Bakta	Bakta	PGAP	Bakta	Bakta/PGAP/Prokka	PGAP	Bakta	Bakta	EggNOG-Mapper	Prokka	Prokka	Bakta	EggNOG-Mapper	EggNOG-Mapper	EggNOG-Mapper
GCA_000176575.2	PGAP	Bakta	Bakta	PGAP	Bakta	Bakta/PGAP/Prokka	PGAP	Bakta	Bakta	EggNOG-Mapper	Prokka	Prokka	Bakta	EggNOG-Mapper	EggNOG-Mapper	EggNOG-Mapper
GCA_000176595.2	PGAP	Bakta	Bakta	PGAP	Bakta	Bakta/PGAP/Prokka	PGAP	Bakta	Bakta	EggNOG-Mapper	Prokka	Prokka	EggNOG-Mapper	EggNOG-Mapper	EggNOG-Mapper	EggNOG-Mapper
GCA_000176615.2	PGAP	Bakta	Bakta	PGAP	Bakta	Bakta/PGAP/Prokka	PGAP	Bakta	Bakta	EggNOG-Mapper	Prokka	Prokka	EggNOG-Mapper	EggNOG-Mapper	EggNOG-Mapper	EggNOG-Mapper
GCA_000176635.2	PGAP	Bakta	Bakta	PGAP	Bakta	Bakta/PGAP/Prokka	PGAP	Bakta	Bakta	PGAP	Prokka	Prokka	Bakta	EggNOG-Mapper	EggNOG-Mapper	EggNOG-Mapper
GCA_000176655.2	PGAP	Bakta	Bakta	PGAP	Bakta	Bakta/PGAP/Prokka	PGAP	Bakta	Bakta	EggNOG-Mapper	Prokka	Prokka	EggNOG-Mapper	EggNOG-Mapper	EggNOG-Mapper	EggNOG-Mapper
GCA_000176675.2	PGAP	Bakta	Bakta	PGAP	Bakta	Bakta/PGAP/Prokka	PGAP	Bakta	Bakta	EggNOG-Mapper	Prokka	Prokka	Bakta	EggNOG-Mapper	EggNOG-Mapper	EggNOG-Mapper
GCA_000176695.2	PGAP	Bakta	Bakta	PGAP	Bakta	Bakta/PGAP/Prokka	PGAP	Bakta	Bakta	EggNOG-Mapper	Prokka	Prokka	Bakta	EggNOG-Mapper	EggNOG-Mapper	EggNOG-Mapper
GCA_000178315.1	PGAP	Bakta	Bakta	Bakta/PGAP/Prokka	Bakta	Bakta/PGAP/Prokka	PGAP	PGAP	Bakta	Prokka	Prokka	EggNOG-Mapper	Bakta	EggNOG-Mapper	EggNOG-Mapper	EggNOG-Mapper
GCA_000178695.1	PGAP	Bakta	Bakta	PGAP	Bakta	Bakta/PGAP/Prokka	PGAP	PGAP	Bakta	Prokka	Prokka	EggNOG-Mapper	EggNOG-Mapper	Bakta	EggNOG-Mapper	EggNOG-Mapper
GCA_000178715.1	PGAP	Bakta	Bakta	PGAP	Bakta	Bakta/PGAP/Prokka	PGAP	PGAP	Bakta	Prokka	Prokka	EggNOG-Mapper	EggNOG-Mapper	EggNOG-Mapper	EggNOG-Mapper	EggNOG-Mapper
GCA_000178735.1	PGAP	Bakta	Bakta	PGAP	Bakta	Bakta/PGAP/Prokka	PGAP	PGAP	Bakta	Prokka	Prokka	EggNOG-Mapper	EggNOG-Mapper	Bakta	EggNOG-Mapper	EggNOG-Mapper
GCA_000178755.1	PGAP	Bakta	Bakta	Bakta/PGAP/Prokka	Bakta	Bakta/PGAP/Prokka	PGAP	Bakta	Bakta	Prokka	Prokka	EggNOG-Mapper	Bakta	Bakta	EggNOG-Mapper	EggNOG-Mapper
GCA_000178795.1	PGAP	Bakta	Bakta	PGAP	Bakta	Bakta/PGAP/Prokka	PGAP	PGAP	Bakta	Prokka	Prokka	EggNOG-Mapper	Bakta	Bakta	EggNOG-Mapper	EggNOG-Mapper
GCA_000179075.1	PGAP	Bakta	Bakta	PGAP	Bakta	Bakta/PGAP/Prokka	PGAP	Bakta	Bakta	Prokka	Prokka	EggNOG-Mapper	Bakta	Bakta	EggNOG-Mapper	EggNOG-Mapper
GCA_000179095.1	PGAP	Bakta	Bakta	PGAP	Bakta/PGAP/Prokka	Bakta/PGAP/Prokka	PGAP	Bakta	Bakta	Prokka	Prokka	EggNOG-Mapper	Bakta	EggNOG-Mapper	EggNOG-Mapper	EggNOG-Mapper
GCA_000179115.1	PGAP	Bakta	Bakta	PGAP	Bakta/PGAP/Prokka	Bakta/PGAP/Prokka	PGAP	Bakta	Bakta	Prokka	Prokka	EggNOG-Mapper	Bakta	EggNOG-Mapper	EggNOG-Mapper	EggNOG-Mapper
GCA_000179135.1	PGAP	Bakta	Bakta	PGAP	Bakta	Bakta/PGAP/Prokka	PGAP	Bakta	Bakta	Prokka	Prokka	EggNOG-Mapper	Bakta	EggNOG-Mapper	EggNOG-Mapper	EggNOG-Mapper
GCA_000179155.1	PGAP	Bakta	Bakta	PGAP	Bakta	Bakta/PGAP/Prokka	PGAP	Bakta	Bakta	Prokka	Prokka	EggNOG-Mapper	Bakta	EggNOG-Mapper	EggNOG-Mapper	EggNOG-Mapper
GCA_000179175.1	PGAP	Bakta	Bakta	PGAP	Bakta/PGAP/Prokka	Bakta/PGAP/Prokka	PGAP	Bakta	Bakta	Prokka	Prokka	EggNOG-Mapper	Bakta	EggNOG-Mapper	EggNOG-Mapper	EggNOG-Mapper
GCA_000179795.1	PGAP	Bakta	Bakta	Bakta/PGAP/Prokka	Bakta/PGAP/Prokka	Bakta/PGAP/Prokka	PGAP	Bakta	Bakta	Prokka	Prokka	EggNOG-Mapper	Bakta	EggNOG-Mapper	EggNOG-Mapper	EggNOG-Mapper
GCA_000181735.1	PGAP	Bakta	Bakta	Bakta/PGAP/Prokka	Bakta	Bakta/PGAP/Prokka	PGAP	Bakta	Bakta	PGAP	Prokka	EggNOG-Mapper	Bakta	EggNOG-Mapper	EggNOG-Mapper	EggNOG-Mapper
GCA_000181755.1	PGAP	Bakta	Bakta	Bakta/PGAP/Prokka	Bakta	Bakta/PGAP/Prokka	PGAP	Bakta	Bakta	Prokka	Prokka	EggNOG-Mapper	Bakta	EggNOG-Mapper	EggNOG-Mapper	EggNOG-Mapper
GCA_000181775.1	PGAP	Bakta	Bakta	Bakta/PGAP/Prokka	Bakta	Bakta/PGAP/Prokka	PGAP	Bakta	Bakta	PGAP	Prokka	EggNOG-Mapper	Bakta	EggNOG-Mapper	EggNOG-Mapper	EggNOG-Mapper
GCA_000183005.2	PGAP	Bakta	Bakta	PGAP	Bakta	Bakta/PGAP/Prokka	PGAP	Bakta	Bakta	Prokka	Prokka	EggNOG-Mapper	EggNOG-Mapper	EggNOG-Mapper	EggNOG-Mapper	EggNOG-Mapper
GCA_000183345.1	PGAP	Bakta	Bakta	Bakta/PGAP/Prokka	Bakta/PGAP/Prokka	Bakta/PGAP/Prokka	PGAP	Bakta	Bakta	Prokka	Prokka	Prokka	Bakta	EggNOG-Mapper	EggNOG-Mapper	EggNOG-Mapper
GCA_000184185.1	PGAP	Bakta	Bakta	Bakta/PGAP/Prokka	Bakta/PGAP/Prokka	Bakta/PGAP/Prokka	PGAP	Bakta	Bakta	Prokka	Prokka	Prokka	Bakta	Bakta	EggNOG-Mapper	EggNOG-Mapper
GCA_000184765.2	PGAP	Bakta	Bakta	PGAP	Bakta	Bakta/PGAP/Prokka	PGAP	Bakta	Bakta	Prokka	Prokka	EggNOG-Mapper	Bakta	EggNOG-Mapper	EggNOG-Mapper	EggNOG-Mapper
GCA_000187285.4	PGAP	Bakta	Bakta	PGAP	Bakta	Bakta/PGAP/Prokka	PGAP	PGAP	Bakta	Prokka	Prokka	EggNOG-Mapper	Bakta	EggNOG-Mapper	EggNOG-Mapper	EggNOG-Mapper
GCA_000187305.3	PGAP	Bakta	Bakta	PGAP	Bakta	Bakta/PGAP/Prokka	PGAP	Bakta	Bakta	Prokka	Prokka	EggNOG-Mapper	Bakta	EggNOG-Mapper	EggNOG-Mapper	EggNOG-Mapper
GCA_000187325.3	PGAP	Bakta	Bakta	PGAP	Bakta	Bakta/PGAP/Prokka	PGAP	Bakta	Bakta	Prokka	Prokka	EggNOG-Mapper	Bakta	EggNOG-Mapper	EggNOG-Mapper	EggNOG-Mapper
GCA_000187345.2	PGAP	Bakta	Bakta	PGAP	Bakta	Bakta/PGAP/Prokka	PGAP	PGAP	Bakta	Prokka	Prokka	EggNOG-Mapper	Bakta	EggNOG-Mapper	EggNOG-Mapper	EggNOG-Mapper
GCA_000187365.2	PGAP	Bakta	Bakta	PGAP	Bakta	Bakta/PGAP/Prokka	PGAP	Bakta	Bakta	Prokka	Prokka	EggNOG-Mapper	Bakta	EggNOG-Mapper	EggNOG-Mapper	EggNOG-Mapper
GCA_000187385.2	PGAP	Bakta	Bakta	PGAP	Bakta	Bakta/PGAP/Prokka	PGAP	PGAP	Bakta	Prokka	Prokka	EggNOG-Mapper	Bakta	EggNOG-Mapper	EggNOG-Mapper	EggNOG-Mapper
GCA_000188755.2	PGAP	Bakta	Bakta	PGAP	Bakta	PGAP/Prokka	PGAP	PGAP	Bakta	PGAP	Prokka	EggNOG-Mapper	EggNOG-Mapper	EggNOG-Mapper	EggNOG-Mapper	EggNOG-Mapper
GCA_000188775.2	PGAP	Bakta	Bakta	PGAP	Bakta	Bakta/PGAP/Prokka	PGAP	PGAP	Bakta	PGAP	Prokka	EggNOG-Mapper	EggNOG-Mapper	EggNOG-Mapper	EggNOG-Mapper	EggNOG-Mapper
GCA_000188815.2	PGAP	Bakta	Bakta	Bakta/PGAP/Prokka	Bakta/PGAP/Prokka	Bakta/PGAP/Prokka	PGAP	Bakta	Bakta	PGAP	Prokka	EggNOG-Mapper	EggNOG-Mapper	EggNOG-Mapper	EggNOG-Mapper	EggNOG-Mapper
GCA_000188835.2	PGAP	Bakta	Bakta	Bakta/PGAP/Prokka	Bakta	Bakta/PGAP/Prokka	PGAP	Bakta	Bakta	PGAP	Prokka	EggNOG-Mapper	Bakta	EggNOG-Mapper	EggNOG-Mapper	EggNOG-Mapper
GCA_000188855.2	PGAP	Bakta	Bakta	PGAP	Bakta/PGAP/Prokka	Bakta/PGAP/Prokka	PGAP	Bakta	Bakta	Prokka	Prokka	EggNOG-Mapper	Bakta	Bakta	EggNOG-Mapper	EggNOG-Mapper
GCA_000188875.2	PGAP	Bakta	Bakta	Bakta/PGAP/Prokka	Bakta	Bakta/PGAP/Prokka	PGAP	Bakta	Bakta	PGAP	Prokka	EggNOG-Mapper	Bakta	EggNOG-Mapper	EggNOG-Mapper	EggNOG-Mapper
GCA_000190795.1	PGAP	Bakta	Bakta	PGAP	Bakta	Bakta/PGAP/Prokka	PGAP	Bakta	Bakta	EggNOG-Mapper	Prokka	Prokka	Bakta	EggNOG-Mapper	EggNOG-Mapper	EggNOG-Mapper
GCA_000190815.1	PGAP	Bakta	Bakta	PGAP	Bakta	Bakta/PGAP/Prokka	PGAP	Bakta	Bakta	PGAP	Prokka	Prokka	Bakta	EggNOG-Mapper	EggNOG-Mapper	EggNOG-Mapper
GCA_000190835.1	PGAP	Bakta	Bakta	PGAP	Bakta	Bakta/PGAP/Prokka	PGAP	Bakta	Bakta	PGAP	Prokka	Prokka	Bakta	EggNOG-Mapper	EggNOG-Mapper	EggNOG-Mapper
GCA_000190855.1	PGAP	Bakta	Bakta	PGAP	Bakta	Bakta/PGAP/Prokka	PGAP	Bakta	Bakta	EggNOG-Mapper	Prokka	Prokka	Bakta	EggNOG-Mapper	EggNOG-Mapper	EggNOG-Mapper
GCA_000190895.1	PGAP	Bakta	Bakta	PGAP	Bakta	Bakta/PGAP/Prokka	PGAP	Bakta	Bakta	Prokka	Prokka	Prokka	Bakta	EggNOG-Mapper	EggNOG-Mapper	EggNOG-Mapper
GCA_000190915.1	PGAP	Bakta	Bakta	PGAP	Bakta	Bakta/PGAP/Prokka	PGAP	Bakta	Bakta	EggNOG-Mapper	Prokka	Prokka	EggNOG-Mapper	EggNOG-Mapper	EggNOG-Mapper	EggNOG-Mapper
GCA_000190955.1	PGAP	Bakta	Bakta	PGAP	Bakta	Bakta/PGAP/Prokka	PGAP	Bakta	Bakta	EggNOG-Mapper	Prokka	Prokka	EggNOG-Mapper	EggNOG-Mapper	EggNOG-Mapper	EggNOG-Mapper
GCA_000190975.1	PGAP	Bakta	Bakta	PGAP	Bakta	Bakta/PGAP/Prokka	PGAP	Bakta	Bakta	PGAP	Prokka	Prokka	EggNOG-Mapper	EggNOG-Mapper	EggNOG-Mapper	EggNOG-Mapper
GCA_000190995.1	PGAP	Bakta	Bakta	PGAP	Bakta/PGAP/Prokka	Bakta/PGAP/Prokka	PGAP	Bakta	Bakta	EggNOG-Mapper	Prokka	Prokka	Bakta	EggNOG-Mapper	EggNOG-Mapper	EggNOG-Mapper
GCA_000191015.1	PGAP	Bakta	Bakta	PGAP	Bakta	Bakta/PGAP/Prokka	PGAP	Bakta	Bakta	PGAP	Prokka	Prokka	Bakta	EggNOG-Mapper	EggNOG-Mapper	EggNOG-Mapper
GCA_000192665.2	PGAP	Bakta	Bakta	PGAP	Bakta	Bakta/PGAP/Prokka	PGAP	Bakta	Bakta	Prokka	Prokka	EggNOG-Mapper	Bakta	EggNOG-Mapper	EggNOG-Mapper	EggNOG-Mapper
GCA_000192685.2	PGAP	Bakta	Bakta	PGAP	Bakta	Bakta/PGAP/Prokka	PGAP	Bakta	Bakta	Prokka	Prokka	EggNOG-Mapper	Bakta	EggNOG-Mapper	EggNOG-Mapper	EggNOG-Mapper
GCA_000193955.2	PGAP	Bakta	Bakta	PGAP	Bakta	Bakta/PGAP/Prokka	PGAP	Bakta	Bakta	Prokka	Prokka	EggNOG-Mapper	Bakta	EggNOG-Mapper	EggNOG-Mapper	EggNOG-Mapper
GCA_000193975.2	PGAP	Bakta	Bakta	PGAP	Bakta	Bakta/PGAP/Prokka	PGAP	Bakta	Bakta	Prokka	Prokka	EggNOG-Mapper	EggNOG-Mapper	EggNOG-Mapper	EggNOG-Mapper	EggNOG-Mapper
GCA_000193995.2	PGAP	Bakta	Bakta	PGAP	Bakta	Bakta/PGAP/Prokka	PGAP	Bakta	Bakta	Prokka	Prokka	EggNOG-Mapper	Bakta	EggNOG-Mapper	EggNOG-Mapper	EggNOG-Mapper
GCA_000194175.2	PGAP	Bakta	Bakta	Bakta/PGAP/Prokka	Bakta	Bakta/PGAP/Prokka	PGAP	Bakta	Bakta	PGAP	Prokka	EggNOG-Mapper	Bakta	EggNOG-Mapper	EggNOG-Mapper	EggNOG-Mapper
GCA_000194215.2	PGAP	Bakta	Bakta	Bakta/PGAP/Prokka	Bakta	Bakta/PGAP/Prokka	PGAP	Bakta	Bakta	PGAP	Prokka	EggNOG-Mapper	Bakta	EggNOG-Mapper	EggNOG-Mapper	EggNOG-Mapper
GCA_000194235.2	PGAP	Bakta	Bakta	Bakta/PGAP/Prokka	Bakta	Bakta/PGAP/Prokka	PGAP	Bakta	Bakta	Prokka	Prokka	EggNOG-Mapper	Bakta	EggNOG-Mapper	EggNOG-Mapper	EggNOG-Mapper
GCA_000194255.1	PGAP	Bakta	Bakta	Bakta/Prokka	Bakta/PGAP/Prokka	Bakta/PGAP/Prokka	PGAP	Bakta	Bakta	Prokka	Prokka	Prokka	Bakta	EggNOG-Mapper	EggNOG-Mapper	EggNOG-Mapper
GCA_000194295.2	PGAP	Bakta	Bakta	Bakta/PGAP/Prokka	Bakta	Bakta/PGAP/Prokka	PGAP	Bakta	Bakta	PGAP	Prokka	EggNOG-Mapper	Bakta	EggNOG-Mapper	EggNOG-Mapper	EggNOG-Mapper
GCA_000194335.2	PGAP	Bakta	Bakta	Bakta/PGAP/Prokka	Bakta	Bakta/PGAP/Prokka	PGAP	Bakta	Bakta	PGAP	Prokka	EggNOG-Mapper	Bakta	EggNOG-Mapper	EggNOG-Mapper	EggNOG-Mapper
GCA_000194355.2	PGAP	Bakta	Bakta	PGAP	Bakta	Bakta/PGAP/Prokka	PGAP	Bakta	Bakta	Prokka	Prokka	EggNOG-Mapper	Bakta	EggNOG-Mapper	EggNOG-Mapper	EggNOG-Mapper
GCA_000194395.2	PGAP	Bakta	Bakta	Bakta/PGAP/Prokka	Bakta	Bakta/PGAP/Prokka	PGAP	Bakta	Bakta	PGAP	Prokka	EggNOG-Mapper	Bakta	EggNOG-Mapper	EggNOG-Mapper	EggNOG-Mapper
GCA_000194415.2	PGAP	Bakta	Bakta	Bakta/PGAP/Prokka	Bakta	Bakta/PGAP/Prokka	PGAP	Bakta	Bakta	Prokka	Prokka	EggNOG-Mapper	Bakta	EggNOG-Mapper	EggNOG-Mapper	EggNOG-Mapper
GCA_000194435.2	PGAP	Bakta	Bakta	Bakta/PGAP/Prokka	Bakta	Bakta/PGAP/Prokka	PGAP	Bakta	Bakta	Prokka	Prokka	EggNOG-Mapper	Bakta	EggNOG-Mapper	EggNOG-Mapper	EggNOG-Mapper
GCA_000194475.2	PGAP	Bakta	Bakta	Bakta/PGAP/Prokka	Bakta/PGAP/Prokka	Bakta/PGAP/Prokka	PGAP	Bakta	Bakta	PGAP	Prokka	EggNOG-Mapper	Bakta	EggNOG-Mapper	EggNOG-Mapper	EggNOG-Mapper
GCA_000194495.2	PGAP	Bakta	Bakta	Bakta/PGAP/Prokka	Bakta	Bakta/PGAP/Prokka	PGAP	Bakta	Bakta	Prokka	Prokka	EggNOG-Mapper	Bakta	EggNOG-Mapper	EggNOG-Mapper	EggNOG-Mapper
GCA_000194535.2	PGAP	Bakta	Bakta	Bakta/PGAP/Prokka	Bakta	Bakta/PGAP/Prokka	PGAP	Bakta	Bakta	Prokka	Prokka	EggNOG-Mapper	Bakta	Bakta	EggNOG-Mapper	EggNOG-Mapper
GCA_000194555.2	PGAP	Bakta	Bakta	PGAP	Bakta/PGAP/Prokka	Bakta/PGAP/Prokka	PGAP	Bakta	Bakta	Prokka	Prokka	EggNOG-Mapper	Bakta	EggNOG-Mapper	EggNOG-Mapper	EggNOG-Mapper
GCA_000194575.2	PGAP	Bakta	Bakta	PGAP	Bakta	Bakta/PGAP/Prokka	PGAP	Bakta	Bakta	Prokka	Prokka	EggNOG-Mapper	Bakta	EggNOG-Mapper	EggNOG-Mapper	EggNOG-Mapper
GCA_000194645.2	PGAP	Bakta	Bakta	Bakta/PGAP/Prokka	Bakta	Bakta/PGAP/Prokka	PGAP	Bakta	Bakta	PGAP	Prokka	EggNOG-Mapper	Bakta	EggNOG-Mapper	EggNOG-Mapper	EggNOG-Mapper
GCA_000194665.2	PGAP	Bakta	Bakta	Bakta/PGAP/Prokka	Bakta	Bakta/PGAP/Prokka	PGAP	Bakta	Bakta	Prokka	Prokka	EggNOG-Mapper	Bakta	EggNOG-Mapper	EggNOG-Mapper	EggNOG-Mapper
GCA_000194685.2	PGAP	Bakta	Bakta	PGAP	Bakta	Bakta/PGAP/Prokka	PGAP	Bakta	Bakta	Prokka	Prokka	EggNOG-Mapper	Bakta	EggNOG-Mapper	EggNOG-Mapper	EggNOG-Mapper
GCA_000194705.2	PGAP	Bakta	Bakta	Bakta/PGAP/Prokka	Bakta/PGAP/Prokka	Bakta/PGAP/Prokka	PGAP	Bakta	Bakta	PGAP	Prokka	EggNOG-Mapper	Bakta	Bakta	EggNOG-Mapper	EggNOG-Mapper
GCA_000194725.2	PGAP	Bakta	Bakta	Bakta/PGAP/Prokka	Bakta	Bakta/PGAP/Prokka	PGAP	Bakta	Bakta	PGAP	Prokka	EggNOG-Mapper	Bakta	EggNOG-Mapper	EggNOG-Mapper	EggNOG-Mapper
GCA_000210475.1	PGAP	Bakta	Bakta	Bakta/PGAP/Prokka	Bakta	Bakta/PGAP/Prokka	PGAP	Bakta	Bakta	PGAP	Prokka	Prokka	Bakta	EggNOG-Mapper	EggNOG-Mapper	EggNOG-Mapper
GCA_000211395.2	PGAP	Bakta	Bakta	Bakta/PGAP/Prokka	Bakta/PGAP/Prokka	Bakta/PGAP/Prokka	PGAP	Bakta	Bakta	Prokka	Prokka	EggNOG-Mapper	Bakta	EggNOG-Mapper	EggNOG-Mapper	EggNOG-Mapper
GCA_000212715.2	PGAP	Bakta	Bakta	Bakta/PGAP/Prokka	Bakta	Bakta/PGAP/Prokka	PGAP	Bakta	Bakta	PGAP	Prokka	Prokka	Bakta	EggNOG-Mapper	EggNOG-Mapper	EggNOG-Mapper
GCA_000214765.3	PGAP	Bakta	Bakta	PGAP	Bakta	Bakta/PGAP/Prokka	PGAP	Bakta	Bakta	Prokka	Prokka	Prokka	Bakta	EggNOG-Mapper	EggNOG-Mapper	EggNOG-Mapper
GCA_000215145.2	PGAP	Bakta	Bakta	Bakta/PGAP/Prokka	Bakta/PGAP/Prokka	Bakta/PGAP/Prokka	PGAP	Bakta	Bakta	Prokka	Prokka	EggNOG-Mapper	Bakta	EggNOG-Mapper	EggNOG-Mapper	EggNOG-Mapper
GCA_000215165.1	PGAP	Bakta	Bakta	Bakta/PGAP/Prokka	Bakta	Bakta/PGAP/Prokka	PGAP	Bakta	Bakta	EggNOG-Mapper	Prokka	Prokka	Bakta	EggNOG-Mapper	EggNOG-Mapper	EggNOG-Mapper
GCA_000215185.2	PGAP	Bakta	Bakta	Bakta/PGAP/Prokka	Bakta	Bakta/PGAP/Prokka	PGAP	Bakta	Bakta	Prokka	Prokka	EggNOG-Mapper	Bakta	EggNOG-Mapper	EggNOG-Mapper	EggNOG-Mapper
GCA_000215205.2	PGAP	Bakta	Bakta	PGAP	Bakta	Bakta/PGAP/Prokka	PGAP	Bakta	Bakta	PGAP	Prokka	EggNOG-Mapper	Bakta	EggNOG-Mapper	EggNOG-Mapper	EggNOG-Mapper
GCA_000215225.2	PGAP	Bakta	Bakta	Bakta/PGAP/Prokka	Bakta	Bakta/PGAP/Prokka	PGAP	Bakta	Bakta	Prokka	Prokka	EggNOG-Mapper	Bakta	EggNOG-Mapper	EggNOG-Mapper	EggNOG-Mapper
GCA_000215245.2	PGAP	Bakta	Bakta	Bakta/PGAP/Prokka	Bakta	Bakta/PGAP/Prokka	PGAP	Bakta	Bakta	Prokka	Prokka	EggNOG-Mapper	Bakta	EggNOG-Mapper	EggNOG-Mapper	EggNOG-Mapper
GCA_000215265.2	PGAP	Bakta	Bakta	PGAP	Bakta	Bakta/PGAP/Prokka	PGAP	Bakta	Bakta	PGAP	Prokka	EggNOG-Mapper	Bakta	EggNOG-Mapper	EggNOG-Mapper	EggNOG-Mapper
GCA_000215285.2	PGAP	Bakta	Bakta	Bakta/PGAP/Prokka	Bakta	Bakta/PGAP/Prokka	PGAP	Bakta	Bakta	PGAP	Prokka	EggNOG-Mapper	Bakta	EggNOG-Mapper	EggNOG-Mapper	EggNOG-Mapper
GCA_000215685.3	PGAP	Bakta	Bakta	PGAP	Bakta	Bakta/PGAP/Prokka	PGAP	Bakta	Bakta	PGAP	Prokka	EggNOG-Mapper	EggNOG-Mapper	EggNOG-Mapper	EggNOG-Mapper	EggNOG-Mapper
GCA_000217695.2	PGAP	Bakta	Bakta	Bakta/PGAP/Prokka	Bakta	Bakta/PGAP/Prokka	PGAP	Bakta	Bakta	Prokka	Prokka	EggNOG-Mapper	Bakta	Bakta	EggNOG-Mapper	EggNOG-Mapper
GCA_000217975.2	PGAP	Bakta	Bakta	Prokka	Bakta	Bakta/PGAP/Prokka	PGAP	Bakta	Bakta	PGAP	Prokka	Prokka	Bakta	EggNOG-Mapper	EggNOG-Mapper	EggNOG-Mapper
GCA_000219515.3	PGAP	Bakta	Bakta	Bakta/PGAP/Prokka	Bakta	Bakta/PGAP/Prokka	PGAP	Bakta	Bakta	Prokka	Prokka	Prokka	Bakta	EggNOG-Mapper	EggNOG-Mapper	EggNOG-Mapper
GCA_000220005.2	PGAP	Bakta	Bakta	Bakta/PGAP/Prokka	Bakta	Bakta/PGAP/Prokka	PGAP	Bakta	Bakta	PGAP	Prokka	Prokka	Bakta	EggNOG-Mapper	EggNOG-Mapper	EggNOG-Mapper
GCA_000220805.2	PGAP	Bakta	Bakta	PGAP/Prokka	Bakta	Bakta/PGAP/Prokka	PGAP	Bakta	Bakta	PGAP	Prokka	EggNOG-Mapper	EggNOG-Mapper	EggNOG-Mapper	EggNOG-Mapper	EggNOG-Mapper
GCA_000221065.2	PGAP	Bakta	Bakta	Bakta/PGAP/Prokka	Bakta	Bakta/PGAP/Prokka	PGAP	Bakta	Bakta	PGAP	Prokka	EggNOG-Mapper	EggNOG-Mapper	EggNOG-Mapper	EggNOG-Mapper	EggNOG-Mapper
GCA_000221885.1	PGAP	Bakta	Bakta	PGAP	Bakta	Bakta/PGAP/Prokka	PGAP	Bakta	Bakta	EggNOG-Mapper	Prokka	Prokka	Bakta	EggNOG-Mapper	EggNOG-Mapper	EggNOG-Mapper
GCA_000222505.2	PGAP	Bakta	Bakta	PGAP	Bakta	Bakta/PGAP/Prokka	PGAP	Bakta	Bakta	PGAP	Prokka	EggNOG-Mapper	Bakta	EggNOG-Mapper	EggNOG-Mapper	EggNOG-Mapper
GCA_000222525.2	PGAP	Bakta	Bakta	PGAP	Bakta	Bakta/PGAP/Prokka	PGAP	PGAP	Bakta	PGAP	Prokka	EggNOG-Mapper	EggNOG-Mapper	EggNOG-Mapper	EggNOG-Mapper	EggNOG-Mapper
GCA_000222545.2	PGAP	Bakta	Bakta	PGAP	Bakta	Bakta/PGAP/Prokka	PGAP	PGAP	Bakta	PGAP	Prokka	EggNOG-Mapper	EggNOG-Mapper	EggNOG-Mapper	EggNOG-Mapper	EggNOG-Mapper
GCA_000223015.2	PGAP	Bakta	Bakta	PGAP	Bakta	Bakta/PGAP/Prokka	PGAP	Bakta	Bakta	Prokka	Prokka	EggNOG-Mapper	Bakta	EggNOG-Mapper	EggNOG-Mapper	EggNOG-Mapper
GCA_000223035.2	PGAP	Bakta	Bakta	Bakta/PGAP/Prokka	Bakta	Bakta/PGAP/Prokka	PGAP	Bakta	Bakta	PGAP	Prokka	EggNOG-Mapper	Bakta	EggNOG-Mapper	EggNOG-Mapper	EggNOG-Mapper
GCA_000224395.2	PGAP	Bakta	Bakta	PGAP	Bakta	Bakta/PGAP/Prokka	PGAP	Bakta	Bakta	Prokka	Prokka	EggNOG-Mapper	Bakta	Bakta	EggNOG-Mapper	EggNOG-Mapper
GCA_000225025.2	PGAP	Bakta	Bakta	PGAP	Bakta	Bakta/PGAP/Prokka	PGAP	Bakta	Bakta	Prokka	Prokka	EggNOG-Mapper	Bakta	EggNOG-Mapper	EggNOG-Mapper	EggNOG-Mapper
GCA_000225045.2	PGAP	Bakta	Bakta	PGAP	Bakta	Bakta/PGAP/Prokka	PGAP	Bakta	Bakta	Prokka	Prokka	EggNOG-Mapper	Bakta	EggNOG-Mapper	EggNOG-Mapper	EggNOG-Mapper
GCA_000225065.2	PGAP	Bakta	Bakta	PGAP	Bakta	Bakta/PGAP/Prokka	PGAP	Bakta	Bakta	PGAP	Prokka	EggNOG-Mapper	Bakta	EggNOG-Mapper	EggNOG-Mapper	EggNOG-Mapper
GCA_000225085.2	PGAP	Bakta	Bakta	PGAP	Bakta	Bakta/PGAP/Prokka	PGAP	Bakta	Bakta	PGAP	Prokka	EggNOG-Mapper	EggNOG-Mapper	EggNOG-Mapper	EggNOG-Mapper	EggNOG-Mapper
GCA_000225105.2	PGAP	Bakta	Bakta	PGAP	Bakta	Bakta/PGAP/Prokka	PGAP	Bakta	Bakta	PGAP	Prokka	EggNOG-Mapper	EggNOG-Mapper	EggNOG-Mapper	EggNOG-Mapper	EggNOG-Mapper
GCA_000225125.2	PGAP	Bakta	Bakta	PGAP	Bakta	Bakta/PGAP/Prokka	PGAP	Bakta	Bakta	PGAP	Prokka	EggNOG-Mapper	EggNOG-Mapper	EggNOG-Mapper	EggNOG-Mapper	EggNOG-Mapper
GCA_000225145.2	PGAP	Bakta	Bakta	PGAP	Bakta	Bakta/PGAP/Prokka	PGAP	Bakta	Bakta	PGAP	Prokka	EggNOG-Mapper	Bakta	EggNOG-Mapper	EggNOG-Mapper	EggNOG-Mapper
GCA_000225165.2	PGAP	Bakta	Bakta	PGAP	Bakta/PGAP/Prokka	Bakta/PGAP/Prokka	PGAP	Bakta	Bakta	PGAP	Prokka	EggNOG-Mapper	Bakta	EggNOG-Mapper	EggNOG-Mapper	EggNOG-Mapper
GCA_000225185.3	PGAP	Bakta	Bakta	PGAP	Bakta	Bakta/PGAP/Prokka	PGAP	Bakta	Bakta	PGAP	Prokka	EggNOG-Mapper	Bakta	EggNOG-Mapper	EggNOG-Mapper	EggNOG-Mapper
GCA_000225205.2	PGAP	Bakta	Bakta	PGAP	Bakta	Bakta/PGAP/Prokka	PGAP	Bakta	Bakta	Prokka	Prokka	EggNOG-Mapper	Bakta	EggNOG-Mapper	EggNOG-Mapper	EggNOG-Mapper
GCA_000225225.2	PGAP	Bakta	Bakta	PGAP/Prokka	Bakta/PGAP/Prokka	Bakta/PGAP/Prokka	PGAP	Bakta	Bakta	Prokka	Prokka	EggNOG-Mapper	Bakta	EggNOG-Mapper	EggNOG-Mapper	EggNOG-Mapper
GCA_000225245.2	PGAP	Bakta	Bakta	PGAP	Bakta	Bakta/PGAP/Prokka	PGAP	Bakta	Bakta	PGAP	Prokka	EggNOG-Mapper	Bakta	EggNOG-Mapper	EggNOG-Mapper	EggNOG-Mapper
GCA_000226585.1	PGAP	Bakta	Bakta	PGAP	Bakta	Bakta/PGAP/Prokka	PGAP	Bakta	Bakta	Prokka	Prokka	EggNOG-Mapper	Bakta	EggNOG-Mapper	EggNOG-Mapper	EggNOG-Mapper
GCA_000227625.1	PGAP	Bakta	Bakta	Bakta/PGAP/Prokka	Bakta	Bakta/PGAP/Prokka	PGAP	Bakta	Bakta	PGAP	Prokka	Prokka	Bakta	EggNOG-Mapper	EggNOG-Mapper	EggNOG-Mapper
GCA_000233675.2	PGAP	Bakta	Bakta	PGAP	Bakta/PGAP/Prokka	Bakta/PGAP/Prokka	PGAP	Bakta	Bakta	PGAP	Prokka	EggNOG-Mapper	EggNOG-Mapper	EggNOG-Mapper	EggNOG-Mapper	EggNOG-Mapper
GCA_000233875.1	PGAP	Bakta	Bakta	Bakta/PGAP/Prokka	Bakta/PGAP/Prokka	Bakta/PGAP/Prokka	PGAP	Bakta	Bakta	PGAP	Prokka	Prokka	Bakta	EggNOG-Mapper	EggNOG-Mapper	EggNOG-Mapper
GCA_000233895.1	PGAP	Bakta	Bakta	Bakta/PGAP/Prokka	Bakta/PGAP/Prokka	Bakta/PGAP/Prokka	PGAP	Bakta	Bakta	PGAP	Prokka	Prokka	Bakta	EggNOG-Mapper	EggNOG-Mapper	EggNOG-Mapper
GCA_000234215.2	PGAP	Bakta	Bakta	PGAP	Bakta	Bakta/PGAP/Prokka	PGAP	PGAP	Bakta	Prokka	Prokka	EggNOG-Mapper	Bakta	Bakta	EggNOG-Mapper	EggNOG-Mapper
GCA_000234235.2	PGAP	Bakta	Bakta	PGAP	Bakta	Bakta/PGAP/Prokka	PGAP	Bakta	Bakta	Prokka	Prokka	EggNOG-Mapper	Bakta	EggNOG-Mapper	EggNOG-Mapper	EggNOG-Mapper
GCA_000234255.3	PGAP	Bakta	Bakta	PGAP	Bakta	Bakta/PGAP/Prokka	PGAP	Bakta	Bakta	Prokka	Prokka	EggNOG-Mapper	Bakta	EggNOG-Mapper	EggNOG-Mapper	EggNOG-Mapper
GCA_000234275.3	PGAP	Bakta	Bakta	Bakta/PGAP/Prokka	Bakta	Bakta/PGAP/Prokka	PGAP	PGAP	Bakta	Prokka	Prokka	EggNOG-Mapper	Bakta	EggNOG-Mapper	EggNOG-Mapper	EggNOG-Mapper
GCA_000234295.2	PGAP	Bakta	Bakta	PGAP	Bakta	Bakta/PGAP/Prokka	PGAP	PGAP	Bakta	Prokka	Prokka	EggNOG-Mapper	Bakta	Bakta	EggNOG-Mapper	EggNOG-Mapper
GCA_000234315.2	PGAP	Bakta	Bakta	Bakta/PGAP/Prokka	Bakta	Bakta/PGAP/Prokka	PGAP	PGAP	Bakta	Prokka	Prokka	EggNOG-Mapper	Bakta	EggNOG-Mapper	EggNOG-Mapper	EggNOG-Mapper
GCA_000234605.2	PGAP	Bakta	Bakta	PGAP	Bakta	Bakta/PGAP/Prokka	PGAP	PGAP	Bakta	Prokka	Prokka	EggNOG-Mapper	EggNOG-Mapper	EggNOG-Mapper	EggNOG-Mapper	EggNOG-Mapper
GCA_000235045.1	PGAP	Bakta	Bakta	Prokka	Bakta	Bakta/PGAP/Prokka	PGAP	Bakta	Bakta	PGAP	Prokka	Prokka	Bakta	EggNOG-Mapper	EggNOG-Mapper	EggNOG-Mapper
GCA_000235065.1	PGAP	Bakta	Bakta	Prokka	Bakta	Bakta/PGAP/Prokka	PGAP	Bakta	Bakta	PGAP	Prokka	Prokka	Bakta	EggNOG-Mapper	EggNOG-Mapper	EggNOG-Mapper
GCA_000235085.1	PGAP	Bakta	Bakta	Prokka	Bakta	Bakta/PGAP/Prokka	PGAP	Bakta	Bakta	EggNOG-Mapper	Prokka	Prokka	Bakta	EggNOG-Mapper	EggNOG-Mapper	EggNOG-Mapper
GCA_000235105.1	PGAP	Bakta	Bakta	Bakta/PGAP/Prokka	Bakta	Bakta/PGAP/Prokka	PGAP	Bakta	Bakta	EggNOG-Mapper	Prokka	Prokka	Bakta	EggNOG-Mapper	EggNOG-Mapper	EggNOG-Mapper
GCA_000235125.1	PGAP	Bakta	Bakta	Prokka	Bakta	Bakta/PGAP/Prokka	PGAP	Bakta	Bakta	EggNOG-Mapper	Prokka	Prokka	Bakta	EggNOG-Mapper	EggNOG-Mapper	EggNOG-Mapper
GCA_000235145.1	PGAP	Bakta	Bakta	Prokka	Bakta	Bakta/PGAP/Prokka	PGAP	Bakta	Bakta	PGAP	Prokka	Prokka	Bakta	EggNOG-Mapper	EggNOG-Mapper	EggNOG-Mapper
GCA_000235165.1	PGAP	Bakta	Bakta	Prokka	Bakta	Bakta/PGAP/Prokka	PGAP	Bakta	Bakta	EggNOG-Mapper	Prokka	Prokka	Bakta	EggNOG-Mapper	EggNOG-Mapper	EggNOG-Mapper
GCA_000235185.1	PGAP	Bakta	Bakta	Prokka	Bakta	Bakta/PGAP/Prokka	PGAP	Bakta	Bakta	PGAP	Prokka	Prokka	Bakta	EggNOG-Mapper	EggNOG-Mapper	EggNOG-Mapper
GCA_000235205.1	PGAP	Bakta	Bakta	Bakta/PGAP/Prokka	Bakta	Bakta/PGAP/Prokka	PGAP	Bakta	Bakta	PGAP	Prokka	Prokka	Bakta	EggNOG-Mapper	EggNOG-Mapper	EggNOG-Mapper
GCA_000235225.1	PGAP	Bakta	Bakta	PGAP/Prokka	Bakta	Bakta/PGAP/Prokka	PGAP	Bakta	Bakta	PGAP	Prokka	Prokka	Bakta	EggNOG-Mapper	EggNOG-Mapper	EggNOG-Mapper
GCA_000235245.1	PGAP	Bakta	Bakta	Prokka	Bakta	Bakta/PGAP/Prokka	PGAP	Bakta	Bakta	EggNOG-Mapper	Prokka	Prokka	Bakta	EggNOG-Mapper	EggNOG-Mapper	EggNOG-Mapper
GCA_000235265.1	PGAP	Bakta	Bakta	Prokka	Bakta	Bakta/PGAP/Prokka	PGAP	Bakta	Bakta	PGAP	Prokka	Prokka	Bakta	EggNOG-Mapper	EggNOG-Mapper	EggNOG-Mapper
GCA_000235285.1	PGAP	Bakta	Bakta	Prokka	Bakta	Bakta/PGAP/Prokka	PGAP	Bakta	Bakta	PGAP	Prokka	Prokka	Bakta	EggNOG-Mapper	EggNOG-Mapper	EggNOG-Mapper
GCA_000241975.1	PGAP	Bakta	Bakta	PGAP	Bakta	Bakta/PGAP/Prokka	PGAP	Bakta	Bakta	EggNOG-Mapper	Prokka	Prokka	Bakta	EggNOG-Mapper	EggNOG-Mapper	EggNOG-Mapper
GCA_000241995.1	PGAP	Bakta	Bakta	PGAP	Bakta	Bakta/PGAP/Prokka	PGAP	Bakta	Bakta	Prokka	Prokka	Prokka	Bakta	EggNOG-Mapper	EggNOG-Mapper	EggNOG-Mapper
GCA_000242015.1	PGAP	Bakta	Bakta	PGAP	Bakta	Bakta/PGAP/Prokka	PGAP	Bakta	Bakta	Prokka	Prokka	Prokka	EggNOG-Mapper	EggNOG-Mapper	EggNOG-Mapper	EggNOG-Mapper
GCA_000242035.1	PGAP	Bakta	Bakta	PGAP	Bakta/PGAP/Prokka	Bakta/PGAP/Prokka	PGAP	Bakta	Bakta	PGAP	Prokka	Prokka	Bakta	EggNOG-Mapper	EggNOG-Mapper	EggNOG-Mapper
GCA_000242055.1	PGAP	Bakta	Bakta	PGAP	Bakta	Bakta/PGAP/Prokka	PGAP	Bakta	Bakta	EggNOG-Mapper	Prokka	Prokka	Bakta	EggNOG-Mapper	EggNOG-Mapper	EggNOG-Mapper
GCA_000243195.1	PGAP	Bakta	Bakta	PGAP	Bakta/PGAP/Prokka	Bakta/PGAP/Prokka	PGAP	Bakta	Bakta	PGAP	Prokka	Prokka	EggNOG-Mapper	EggNOG-Mapper	EggNOG-Mapper	EggNOG-Mapper
GCA_000245515.1	PGAP	Bakta	Bakta	Bakta/PGAP/Prokka	Bakta	Bakta/PGAP/Prokka	PGAP	Bakta	Bakta	Prokka	Prokka	Prokka	Bakta	EggNOG-Mapper	EggNOG-Mapper	EggNOG-Mapper
GCA_000247665.4	PGAP	Bakta	Bakta	PGAP	Bakta	Bakta/PGAP/Prokka	PGAP	Bakta	Bakta	PGAP	Prokka	EggNOG-Mapper	Bakta	EggNOG-Mapper	EggNOG-Mapper	EggNOG-Mapper
GCA_000249055.2	PGAP	Bakta	Bakta	PGAP	Bakta	Bakta/PGAP/Prokka	PGAP	Bakta	Bakta	PGAP	Prokka	EggNOG-Mapper	Bakta	EggNOG-Mapper	EggNOG-Mapper	EggNOG-Mapper
GCA_000249075.2	PGAP	Bakta	Bakta	PGAP	Bakta	Bakta/PGAP/Prokka	PGAP	Bakta	Bakta	PGAP	Prokka	EggNOG-Mapper	EggNOG-Mapper	EggNOG-Mapper	EggNOG-Mapper	EggNOG-Mapper
GCA_000249095.2	PGAP	Bakta	Bakta	PGAP	Bakta	Bakta/PGAP/Prokka	PGAP	Bakta	Bakta	PGAP	Prokka	EggNOG-Mapper	Bakta	EggNOG-Mapper	EggNOG-Mapper	EggNOG-Mapper
GCA_000249115.2	PGAP	Bakta	Bakta	PGAP	Bakta	Bakta/PGAP/Prokka	PGAP	Bakta	Bakta	PGAP	Prokka	EggNOG-Mapper	Bakta	EggNOG-Mapper	EggNOG-Mapper	EggNOG-Mapper
GCA_000249135.2	PGAP	Bakta	Bakta	PGAP	Bakta/PGAP/Prokka	Bakta/PGAP/Prokka	PGAP	Bakta	Bakta	PGAP	Prokka	EggNOG-Mapper	EggNOG-Mapper	EggNOG-Mapper	EggNOG-Mapper	EggNOG-Mapper
GCA_000249155.2	PGAP	Bakta	Bakta	PGAP	Bakta/PGAP/Prokka	Bakta/PGAP/Prokka	PGAP	Bakta	Bakta	PGAP	Prokka	EggNOG-Mapper	EggNOG-Mapper	EggNOG-Mapper	EggNOG-Mapper	EggNOG-Mapper
GCA_000249175.2	PGAP	Bakta	Bakta	PGAP	Bakta	Bakta/PGAP/Prokka	PGAP	Bakta	Bakta	PGAP	Prokka	EggNOG-Mapper	EggNOG-Mapper	EggNOG-Mapper	EggNOG-Mapper	EggNOG-Mapper
GCA_000249195.2	PGAP	Bakta	Bakta	PGAP	Bakta	Bakta/PGAP/Prokka	PGAP	Bakta	Bakta	PGAP	Prokka	EggNOG-Mapper	EggNOG-Mapper	EggNOG-Mapper	EggNOG-Mapper	EggNOG-Mapper
GCA_000249215.2	PGAP	Bakta	Bakta	PGAP	Bakta/PGAP/Prokka	Bakta/PGAP/Prokka	PGAP	Bakta	Bakta	PGAP	Prokka	EggNOG-Mapper	Bakta	EggNOG-Mapper	EggNOG-Mapper	EggNOG-Mapper
GCA_000249235.2	PGAP	Bakta	Bakta	PGAP	Bakta	Bakta/PGAP/Prokka	PGAP	Bakta	Bakta	PGAP	Prokka	EggNOG-Mapper	EggNOG-Mapper	EggNOG-Mapper	EggNOG-Mapper	EggNOG-Mapper
GCA_000249255.2	PGAP	Bakta	Bakta	PGAP	Bakta	Bakta/PGAP/Prokka	PGAP	Bakta	Bakta	Prokka	Prokka	EggNOG-Mapper	Bakta	EggNOG-Mapper	EggNOG-Mapper	EggNOG-Mapper
GCA_000249275.2	PGAP	Bakta	Bakta	PGAP	Bakta	Bakta/PGAP/Prokka	PGAP	Bakta	Bakta	PGAP	Prokka	EggNOG-Mapper	Bakta	EggNOG-Mapper	EggNOG-Mapper	EggNOG-Mapper
GCA_000249295.2	PGAP	Bakta	Bakta	PGAP	Bakta	Bakta/PGAP/Prokka	PGAP	Bakta	Bakta	PGAP	Prokka	EggNOG-Mapper	Bakta	EggNOG-Mapper	EggNOG-Mapper	EggNOG-Mapper
GCA_000249315.2	PGAP	Bakta	Bakta	PGAP	Bakta	Bakta/PGAP/Prokka	PGAP	Bakta	Bakta	PGAP	Prokka	EggNOG-Mapper	Bakta	EggNOG-Mapper	EggNOG-Mapper	EggNOG-Mapper
GCA_000249335.2	PGAP	Bakta	Bakta	PGAP	Bakta	Bakta/PGAP/Prokka	PGAP	Bakta	Bakta	Prokka	Prokka	EggNOG-Mapper	Bakta	EggNOG-Mapper	EggNOG-Mapper	EggNOG-Mapper
GCA_000249355.2	PGAP	Bakta	Bakta	Bakta/PGAP/Prokka	Bakta	Bakta/PGAP/Prokka	PGAP	Bakta	Bakta	Prokka	Prokka	EggNOG-Mapper	Bakta	EggNOG-Mapper	EggNOG-Mapper	EggNOG-Mapper
GCA_000249375.2	PGAP	Bakta	Bakta	PGAP/Prokka	Bakta	Bakta/PGAP/Prokka	PGAP	Bakta	Bakta	PGAP	Prokka	EggNOG-Mapper	Bakta	EggNOG-Mapper	EggNOG-Mapper	EggNOG-Mapper
GCA_000249395.2	PGAP	Bakta	Bakta	PGAP	Bakta	Bakta/PGAP/Prokka	PGAP	Bakta	Bakta	Prokka	Prokka	EggNOG-Mapper	Bakta	EggNOG-Mapper	EggNOG-Mapper	EggNOG-Mapper
GCA_000249415.2	PGAP	Bakta	Bakta	PGAP	Bakta	Bakta/PGAP/Prokka	PGAP	Bakta	Bakta	PGAP	Prokka	EggNOG-Mapper	Bakta	EggNOG-Mapper	EggNOG-Mapper	EggNOG-Mapper
GCA_000249435.2	PGAP	Bakta	Bakta	PGAP	Bakta	Bakta/PGAP/Prokka	PGAP	Bakta	Bakta	PGAP	Prokka	EggNOG-Mapper	Bakta	EggNOG-Mapper	EggNOG-Mapper	EggNOG-Mapper
GCA_000249455.2	PGAP	Bakta	Bakta	PGAP	Bakta	Bakta/PGAP/Prokka	PGAP	Bakta	Bakta	Prokka	Prokka	EggNOG-Mapper	Bakta	EggNOG-Mapper	EggNOG-Mapper	EggNOG-Mapper
GCA_000249475.2	PGAP	Bakta	Bakta	PGAP	Bakta	Bakta/PGAP/Prokka	PGAP	Bakta	Bakta	Prokka	Prokka	EggNOG-Mapper	Bakta	EggNOG-Mapper	EggNOG-Mapper	EggNOG-Mapper
GCA_000249495.2	PGAP	Bakta	Bakta	PGAP	Bakta	Bakta/PGAP/Prokka	PGAP	Bakta	Bakta	Prokka	Prokka	EggNOG-Mapper	Bakta	EggNOG-Mapper	EggNOG-Mapper	EggNOG-Mapper
GCA_000249515.2	PGAP	Bakta	Bakta	PGAP	Bakta	Bakta/PGAP/Prokka	PGAP	Bakta	Bakta	Prokka	Prokka	EggNOG-Mapper	Bakta	EggNOG-Mapper	EggNOG-Mapper	EggNOG-Mapper
GCA_000249535.2	PGAP	Bakta	Bakta	PGAP	Bakta	Bakta/PGAP/Prokka	PGAP	Bakta	Bakta	Prokka	Prokka	EggNOG-Mapper	Bakta	EggNOG-Mapper	EggNOG-Mapper	EggNOG-Mapper
GCA_000249555.2	PGAP	Bakta	Bakta	PGAP	Bakta	Bakta/PGAP/Prokka	PGAP	Bakta	Bakta	Prokka	Prokka	EggNOG-Mapper	Bakta	EggNOG-Mapper	EggNOG-Mapper	EggNOG-Mapper
GCA_000249575.2	PGAP	Bakta	Bakta	PGAP	Bakta	Bakta/PGAP/Prokka	PGAP	Bakta	Bakta	PGAP	Prokka	EggNOG-Mapper	Bakta	EggNOG-Mapper	EggNOG-Mapper	EggNOG-Mapper
GCA_000249595.2	PGAP	Bakta	Bakta	PGAP	Bakta/PGAP/Prokka	Bakta/PGAP/Prokka	PGAP	Bakta	Bakta	PGAP	Prokka	EggNOG-Mapper	Bakta	EggNOG-Mapper	EggNOG-Mapper	EggNOG-Mapper
GCA_000249615.2	PGAP	Bakta	Bakta	PGAP	Bakta	Bakta/PGAP/Prokka	PGAP	Bakta	Bakta	PGAP	Prokka	EggNOG-Mapper	Bakta	EggNOG-Mapper	EggNOG-Mapper	EggNOG-Mapper
GCA_000249635.2	PGAP	Bakta	Bakta	Bakta/PGAP/Prokka	Bakta	Bakta/PGAP/Prokka	PGAP	Bakta	Bakta	PGAP	Prokka	EggNOG-Mapper	Bakta	EggNOG-Mapper	EggNOG-Mapper	EggNOG-Mapper
GCA_000249655.2	PGAP	Bakta	Bakta	PGAP	Bakta	Bakta/PGAP/Prokka	PGAP	Bakta	Bakta	PGAP	Prokka	EggNOG-Mapper	Bakta	EggNOG-Mapper	EggNOG-Mapper	EggNOG-Mapper
GCA_000249675.2	PGAP	Bakta	Bakta	PGAP	Bakta	Bakta/PGAP/Prokka	PGAP	Bakta	Bakta	PGAP	Prokka	EggNOG-Mapper	Bakta	EggNOG-Mapper	EggNOG-Mapper	EggNOG-Mapper
GCA_000249695.2	PGAP	Bakta	Bakta	Bakta/PGAP/Prokka	Bakta/PGAP/Prokka	Bakta/PGAP/Prokka	PGAP	Bakta	Bakta	PGAP	Prokka	EggNOG-Mapper	Bakta	EggNOG-Mapper	EggNOG-Mapper	EggNOG-Mapper
GCA_000249715.2	PGAP	Bakta	Bakta	PGAP	Bakta	Bakta/PGAP/Prokka	PGAP	Bakta	Bakta	PGAP	Prokka	EggNOG-Mapper	Bakta	EggNOG-Mapper	EggNOG-Mapper	EggNOG-Mapper
GCA_000249735.2	PGAP	Bakta	Bakta	PGAP	Bakta/PGAP/Prokka	Bakta/PGAP/Prokka	PGAP	Bakta	Bakta	PGAP	Prokka	EggNOG-Mapper	Bakta	EggNOG-Mapper	EggNOG-Mapper	EggNOG-Mapper
GCA_000249755.2	PGAP	Bakta	Bakta	PGAP	Bakta	Bakta/PGAP/Prokka	PGAP	Bakta	Bakta	PGAP	Prokka	EggNOG-Mapper	Bakta	EggNOG-Mapper	EggNOG-Mapper	EggNOG-Mapper
GCA_000249775.2	PGAP	Bakta	Bakta	PGAP	Bakta/PGAP/Prokka	Bakta/PGAP/Prokka	PGAP	Bakta	Bakta	PGAP	Prokka	EggNOG-Mapper	Bakta	EggNOG-Mapper	EggNOG-Mapper	EggNOG-Mapper
GCA_000249795.2	PGAP	Bakta	Bakta	PGAP	Bakta	Bakta/PGAP/Prokka	PGAP	Bakta	Bakta	PGAP	Prokka	EggNOG-Mapper	Bakta	EggNOG-Mapper	EggNOG-Mapper	EggNOG-Mapper
GCA_000249815.2	PGAP	Bakta	Bakta	PGAP	Bakta	Bakta/PGAP/Prokka	PGAP	Bakta	Bakta	PGAP	Prokka	EggNOG-Mapper	Bakta	EggNOG-Mapper	EggNOG-Mapper	EggNOG-Mapper
GCA_000249835.2	PGAP	Bakta	Bakta	PGAP	Bakta	Bakta/PGAP/Prokka	PGAP	Bakta	Bakta	PGAP	Prokka	EggNOG-Mapper	Bakta	EggNOG-Mapper	EggNOG-Mapper	EggNOG-Mapper
GCA_000249855.2	PGAP	Bakta	Bakta	PGAP	Bakta	Bakta/PGAP/Prokka	PGAP	Bakta	Bakta	PGAP	Prokka	EggNOG-Mapper	Bakta	EggNOG-Mapper	EggNOG-Mapper	EggNOG-Mapper
GCA_000249875.2	PGAP	Bakta	Bakta	PGAP	Bakta	Bakta/PGAP/Prokka	PGAP	Bakta	Bakta	Prokka	Prokka	EggNOG-Mapper	Bakta	EggNOG-Mapper	EggNOG-Mapper	EggNOG-Mapper
GCA_000249895.2	PGAP	Bakta	Bakta	PGAP/Prokka	Bakta	Bakta/PGAP/Prokka	PGAP	Bakta	Bakta	PGAP	Prokka	EggNOG-Mapper	Bakta	EggNOG-Mapper	EggNOG-Mapper	EggNOG-Mapper
GCA_000249915.2	PGAP	Bakta	Bakta	PGAP	Bakta	Bakta/PGAP/Prokka	PGAP	Bakta	Bakta	Prokka	Prokka	EggNOG-Mapper	Bakta	EggNOG-Mapper	EggNOG-Mapper	EggNOG-Mapper
GCA_000249935.2	PGAP	Bakta	Bakta	PGAP	Bakta	Bakta/PGAP/Prokka	PGAP	Bakta	Bakta	Prokka	Prokka	EggNOG-Mapper	Bakta	EggNOG-Mapper	EggNOG-Mapper	EggNOG-Mapper
GCA_000249955.2	PGAP	Bakta	Bakta	PGAP	Bakta	Bakta/PGAP/Prokka	PGAP	Bakta	Bakta	Prokka	Prokka	EggNOG-Mapper	Bakta	EggNOG-Mapper	EggNOG-Mapper	EggNOG-Mapper
GCA_000249975.2	PGAP	Bakta	Bakta	PGAP	Bakta	Bakta/PGAP/Prokka	PGAP	Bakta	Bakta	PGAP	Prokka	EggNOG-Mapper	Bakta	EggNOG-Mapper	EggNOG-Mapper	EggNOG-Mapper
GCA_000249995.2	PGAP	Bakta	Bakta	PGAP	Bakta	Bakta/PGAP/Prokka	PGAP	Bakta	Bakta	PGAP	Prokka	EggNOG-Mapper	Bakta	EggNOG-Mapper	EggNOG-Mapper	EggNOG-Mapper
GCA_000250015.2	PGAP	Bakta	Bakta	PGAP	Bakta	Bakta/PGAP/Prokka	PGAP	Bakta	Bakta	PGAP	Prokka	EggNOG-Mapper	Bakta	EggNOG-Mapper	EggNOG-Mapper	EggNOG-Mapper
GCA_000250035.2	PGAP	Bakta	Bakta	PGAP	Bakta	Bakta/PGAP/Prokka	PGAP	Bakta	Bakta	PGAP	Prokka	EggNOG-Mapper	Bakta	EggNOG-Mapper	EggNOG-Mapper	EggNOG-Mapper
GCA_000250055.2	PGAP	Bakta	Bakta	PGAP	Bakta	Bakta/PGAP/Prokka	PGAP	Bakta	Bakta	PGAP	Prokka	EggNOG-Mapper	EggNOG-Mapper	EggNOG-Mapper	EggNOG-Mapper	EggNOG-Mapper
GCA_000250075.2	PGAP	Bakta	Bakta	PGAP	Bakta	Bakta/PGAP/Prokka	PGAP	Bakta	Bakta	PGAP	Prokka	EggNOG-Mapper	Bakta	EggNOG-Mapper	EggNOG-Mapper	EggNOG-Mapper
GCA_000250095.2	PGAP	Bakta	Bakta	PGAP	Bakta	Bakta/PGAP/Prokka	PGAP	Bakta	Bakta	PGAP	Prokka	EggNOG-Mapper	Bakta	EggNOG-Mapper	EggNOG-Mapper	EggNOG-Mapper
GCA_000250115.2	PGAP	Bakta	Bakta	PGAP	Bakta	Bakta/PGAP/Prokka	PGAP	Bakta	Bakta	Prokka	Prokka	EggNOG-Mapper	Bakta	EggNOG-Mapper	EggNOG-Mapper	EggNOG-Mapper
GCA_000250135.2	PGAP	Bakta	Bakta	PGAP	Bakta	Bakta/PGAP/Prokka	PGAP	Bakta	Bakta	Prokka	Prokka	EggNOG-Mapper	Bakta	EggNOG-Mapper	EggNOG-Mapper	EggNOG-Mapper
GCA_000250155.2	PGAP	Bakta	Bakta	PGAP	Bakta	Bakta/PGAP/Prokka	PGAP	Bakta	Bakta	PGAP	Prokka	EggNOG-Mapper	Bakta	EggNOG-Mapper	EggNOG-Mapper	EggNOG-Mapper
GCA_000250175.2	PGAP	Bakta	Bakta	Bakta/PGAP/Prokka	Bakta	Bakta/PGAP/Prokka	PGAP	Bakta	Bakta	PGAP	Prokka	EggNOG-Mapper	Bakta	EggNOG-Mapper	EggNOG-Mapper	EggNOG-Mapper
GCA_000250195.2	PGAP	Bakta	Bakta	Bakta/PGAP/Prokka	Bakta	Bakta/PGAP/Prokka	PGAP	Bakta	Bakta	PGAP	Prokka	EggNOG-Mapper	Bakta	EggNOG-Mapper	EggNOG-Mapper	EggNOG-Mapper
GCA_000250215.2	PGAP	Bakta	Bakta	PGAP	Bakta	Bakta/PGAP/Prokka	PGAP	Bakta	Bakta	PGAP	Prokka	EggNOG-Mapper	Bakta	EggNOG-Mapper	EggNOG-Mapper	EggNOG-Mapper
GCA_000250235.2	PGAP	Bakta	Bakta	PGAP	Bakta	Bakta/PGAP/Prokka	PGAP	Bakta	Bakta	PGAP	Prokka	EggNOG-Mapper	Bakta	EggNOG-Mapper	EggNOG-Mapper	EggNOG-Mapper
GCA_000250255.2	PGAP	Bakta	Bakta	PGAP	Bakta	Bakta/PGAP/Prokka	PGAP	Bakta	Bakta	PGAP	Prokka	EggNOG-Mapper	EggNOG-Mapper	EggNOG-Mapper	EggNOG-Mapper	EggNOG-Mapper
GCA_000250275.2	PGAP	Bakta	Bakta	PGAP	Bakta	Bakta/PGAP/Prokka	PGAP	Bakta	Bakta	PGAP	Prokka	EggNOG-Mapper	Bakta	EggNOG-Mapper	EggNOG-Mapper	EggNOG-Mapper
GCA_000250295.2	PGAP	Bakta	Bakta	PGAP	Bakta	Bakta/PGAP/Prokka	PGAP	Bakta	Bakta	Prokka	Prokka	EggNOG-Mapper	Bakta	EggNOG-Mapper	EggNOG-Mapper	EggNOG-Mapper
GCA_000250315.2	PGAP	Bakta	Bakta	PGAP	Bakta/PGAP/Prokka	Bakta/PGAP/Prokka	PGAP	Bakta	Bakta	PGAP	Prokka	EggNOG-Mapper	Bakta	EggNOG-Mapper	EggNOG-Mapper	EggNOG-Mapper
GCA_000250335.2	PGAP	Bakta	Bakta	PGAP	Bakta/PGAP/Prokka	Bakta/PGAP/Prokka	PGAP	Bakta	Bakta	Prokka	Prokka	EggNOG-Mapper	Bakta	EggNOG-Mapper	EggNOG-Mapper	EggNOG-Mapper
GCA_000250355.2	PGAP	Bakta	Bakta	PGAP	Bakta	Bakta/PGAP/Prokka	PGAP	Bakta	Bakta	PGAP	Prokka	EggNOG-Mapper	Bakta	EggNOG-Mapper	EggNOG-Mapper	EggNOG-Mapper
GCA_000250375.2	PGAP	Bakta	Bakta	PGAP	Bakta	Bakta/PGAP/Prokka	PGAP	Bakta	Bakta	Prokka	Prokka	EggNOG-Mapper	Bakta	EggNOG-Mapper	EggNOG-Mapper	EggNOG-Mapper
GCA_000250395.2	PGAP	Bakta	Bakta	PGAP	Bakta	Bakta/PGAP/Prokka	PGAP	Bakta	Bakta	PGAP	Prokka	EggNOG-Mapper	Bakta	EggNOG-Mapper	EggNOG-Mapper	EggNOG-Mapper
GCA_000250415.2	PGAP	Bakta	Bakta	PGAP	Bakta/PGAP/Prokka	Bakta/PGAP/Prokka	PGAP	Bakta	Bakta	PGAP	Prokka	EggNOG-Mapper	Bakta	EggNOG-Mapper	EggNOG-Mapper	EggNOG-Mapper
GCA_000250435.2	PGAP	Bakta	Bakta	PGAP	Bakta	Bakta/PGAP/Prokka	PGAP	Bakta	Bakta	PGAP	Prokka	EggNOG-Mapper	Bakta	EggNOG-Mapper	EggNOG-Mapper	EggNOG-Mapper
GCA_000250455.2	PGAP	Bakta	Bakta	PGAP	Bakta	Bakta/PGAP/Prokka	PGAP	Bakta	Bakta	PGAP	Prokka	EggNOG-Mapper	Bakta	EggNOG-Mapper	EggNOG-Mapper	EggNOG-Mapper
GCA_000250475.2	PGAP	Bakta	Bakta	PGAP	Bakta	Bakta/PGAP/Prokka	PGAP	Bakta	Bakta	PGAP	Prokka	EggNOG-Mapper	Bakta	EggNOG-Mapper	EggNOG-Mapper	EggNOG-Mapper
GCA_000250495.2	PGAP	Bakta	Bakta	PGAP	Bakta	Bakta/PGAP/Prokka	PGAP	Bakta	Bakta	PGAP	Prokka	EggNOG-Mapper	Bakta	EggNOG-Mapper	EggNOG-Mapper	EggNOG-Mapper
GCA_000250515.2	PGAP	Bakta	Bakta	PGAP	Bakta	Bakta/PGAP/Prokka	PGAP	Bakta	Bakta	PGAP	Prokka	EggNOG-Mapper	Bakta	EggNOG-Mapper	EggNOG-Mapper	EggNOG-Mapper
GCA_000250535.2	PGAP	Bakta	Bakta	PGAP	Bakta	Bakta/PGAP/Prokka	PGAP	Bakta	Bakta	PGAP	Prokka	EggNOG-Mapper	Bakta	EggNOG-Mapper	EggNOG-Mapper	EggNOG-Mapper
GCA_000250555.2	PGAP	Bakta	Bakta	PGAP	Bakta	Bakta/PGAP/Prokka	PGAP	Bakta	Bakta	PGAP	Prokka	EggNOG-Mapper	Bakta	EggNOG-Mapper	EggNOG-Mapper	EggNOG-Mapper
GCA_000250575.2	PGAP	Bakta	Bakta	PGAP	Bakta	Bakta/PGAP/Prokka	PGAP	Bakta	Bakta	PGAP	Prokka	EggNOG-Mapper	Bakta	EggNOG-Mapper	EggNOG-Mapper	EggNOG-Mapper
GCA_000252805.2	PGAP	Bakta	Bakta	Bakta/PGAP/Prokka	Bakta/PGAP/Prokka	Bakta/PGAP/Prokka	PGAP	Bakta	Bakta	Prokka	Prokka	EggNOG-Mapper	Bakta	EggNOG-Mapper	EggNOG-Mapper	EggNOG-Mapper
GCA_000257275.1	PGAP	Bakta	Bakta	Bakta/PGAP/Prokka	Bakta	Bakta/PGAP/Prokka	PGAP	Bakta	Bakta	PGAP	Prokka	Prokka	Bakta	EggNOG-Mapper	EggNOG-Mapper	EggNOG-Mapper
GCA_000258025.1	PGAP	Bakta	Bakta	Bakta/PGAP/Prokka	Bakta/PGAP/Prokka	Bakta/PGAP/Prokka	PGAP	Bakta	Bakta	Prokka	Prokka	Prokka	Bakta	EggNOG-Mapper	EggNOG-Mapper	EggNOG-Mapper
GCA_000258145.1	PGAP	Bakta	Bakta	Bakta/PGAP/Prokka	Bakta/PGAP/Prokka	Bakta/PGAP/Prokka	PGAP	Bakta	Bakta	Prokka	Prokka	Prokka	Bakta	Bakta	EggNOG-Mapper	EggNOG-Mapper
GCA_000258225.1	PGAP	Bakta	Bakta	PGAP	Bakta	Bakta/PGAP/Prokka	PGAP	Bakta	Bakta	Prokka	Prokka	Prokka	Bakta	EggNOG-Mapper	EggNOG-Mapper	EggNOG-Mapper
GCA_000258615.1	PGAP	Bakta	Bakta	Bakta/PGAP/Prokka	Bakta	Bakta/PGAP/Prokka	PGAP	Bakta	Bakta	EggNOG-Mapper	Prokka	EggNOG-Mapper	Bakta	EggNOG-Mapper	EggNOG-Mapper	EggNOG-Mapper
GCA_000258635.1	PGAP	Bakta	Bakta	PGAP	Bakta	Bakta/PGAP/Prokka	PGAP	Bakta	Bakta	PGAP	Prokka	EggNOG-Mapper	Bakta	EggNOG-Mapper	EggNOG-Mapper	EggNOG-Mapper
GCA_000258785.1	PGAP	Bakta	Bakta	PGAP	Bakta	Bakta/PGAP/Prokka	PGAP	Bakta	Bakta	Prokka	Prokka	Prokka	Bakta	EggNOG-Mapper	EggNOG-Mapper	EggNOG-Mapper
GCA_000258865.1	PGAP	Bakta	Bakta	PGAP	Bakta	Bakta/PGAP/Prokka	PGAP	Bakta	Bakta	Prokka	Prokka	Prokka	Bakta	Bakta	EggNOG-Mapper	EggNOG-Mapper
GCA_000259135.1	PGAP	Bakta	Bakta	PGAP	Bakta/PGAP/Prokka	Bakta/PGAP/Prokka	PGAP	PGAP	Bakta	Prokka	Prokka	Prokka	Bakta	EggNOG-Mapper	EggNOG-Mapper	EggNOG-Mapper
GCA_000259385.1	PGAP	Bakta	Bakta	PGAP	Bakta	Bakta/PGAP/Prokka	PGAP	Bakta	Bakta	Prokka	Prokka	Prokka	Bakta	EggNOG-Mapper	EggNOG-Mapper	EggNOG-Mapper
GCA_000259425.1	PGAP	Bakta	Bakta	PGAP	Bakta	Bakta/PGAP/Prokka	PGAP	Bakta	Bakta	Prokka	Prokka	Prokka	Bakta	EggNOG-Mapper	EggNOG-Mapper	EggNOG-Mapper
GCA_000259695.1	PGAP	Bakta	Bakta	Bakta/PGAP	Bakta	Bakta/PGAP/Prokka	PGAP	Bakta	Bakta	EggNOG-Mapper	Prokka	EggNOG-Mapper	Bakta	EggNOG-Mapper	EggNOG-Mapper	EggNOG-Mapper
GCA_000260475.1	PGAP	Bakta	Bakta	PGAP	Bakta	Bakta/PGAP/Prokka	PGAP	Bakta	Bakta	Prokka	Prokka	Prokka	Bakta	EggNOG-Mapper	EggNOG-Mapper	EggNOG-Mapper
GCA_000261145.1	PGAP	Bakta	Bakta	Prokka	Bakta	Bakta/PGAP/Prokka	PGAP	Bakta	Bakta	EggNOG-Mapper	Prokka	EggNOG-Mapper	Bakta	EggNOG-Mapper	EggNOG-Mapper	EggNOG-Mapper
GCA_000261385.1	PGAP	Bakta	Bakta	Prokka	Bakta	Bakta/PGAP/Prokka	PGAP	Bakta	Bakta	EggNOG-Mapper	Prokka	Prokka	Bakta	EggNOG-Mapper	EggNOG-Mapper	EggNOG-Mapper
GCA_000261405.1	PGAP	Bakta	Bakta	Prokka	Bakta/PGAP/Prokka	Bakta/PGAP/Prokka	PGAP	Bakta	Bakta	EggNOG-Mapper	Prokka	Prokka	Bakta	EggNOG-Mapper	EggNOG-Mapper	EggNOG-Mapper
GCA_000262125.1	PGAP	Bakta	Bakta	Bakta/PGAP/Prokka	Bakta	Bakta/PGAP/Prokka	PGAP	Bakta	Bakta	Prokka	Prokka	Prokka	Bakta	EggNOG-Mapper	EggNOG-Mapper	EggNOG-Mapper
GCA_000263895.1	PGAP	Bakta	Bakta	PGAP	Bakta	Bakta/PGAP/Prokka	PGAP	Bakta	Bakta	Prokka	Prokka	Prokka	Bakta	EggNOG-Mapper	EggNOG-Mapper	EggNOG-Mapper
GCA_000263915.1	PGAP	Bakta	Bakta	PGAP	Bakta	Bakta/PGAP/Prokka	PGAP	PGAP	Bakta	Prokka	Prokka	Prokka	Bakta	EggNOG-Mapper	EggNOG-Mapper	EggNOG-Mapper
GCA_000263935.1	PGAP	Bakta	Bakta	Bakta/PGAP/Prokka	Bakta	Bakta/PGAP/Prokka	PGAP	PGAP	Bakta	Prokka	Prokka	Prokka	Bakta	EggNOG-Mapper	EggNOG-Mapper	EggNOG-Mapper
GCA_000263955.1	PGAP	Bakta	Bakta	PGAP	Bakta	Bakta/PGAP/Prokka	PGAP	PGAP	Bakta	Prokka	Prokka	Prokka	EggNOG-Mapper	EggNOG-Mapper	EggNOG-Mapper	EggNOG-Mapper
GCA_000263975.1	PGAP	Bakta	Bakta	PGAP	Bakta	Bakta/PGAP/Prokka	PGAP	PGAP	Bakta	Prokka	Prokka	Prokka	EggNOG-Mapper	EggNOG-Mapper	EggNOG-Mapper	EggNOG-Mapper
GCA_000263995.1	PGAP	Bakta	Bakta	PGAP	Bakta	Bakta/PGAP/Prokka	PGAP	PGAP	Bakta	Prokka	Prokka	Prokka	Bakta	EggNOG-Mapper	EggNOG-Mapper	EggNOG-Mapper
GCA_000264015.1	PGAP	Bakta	Bakta	PGAP	Bakta	Bakta/PGAP/Prokka	PGAP	PGAP	Bakta	Prokka	Prokka	Prokka	Bakta	Bakta	EggNOG-Mapper	EggNOG-Mapper
GCA_000264035.1	PGAP	Bakta	Bakta	PGAP	Bakta	Bakta/PGAP/Prokka	PGAP	PGAP	Bakta	Prokka	Prokka	Prokka	Bakta	Bakta	EggNOG-Mapper	EggNOG-Mapper
GCA_000264095.1	PGAP	Bakta	Bakta	Bakta/PGAP/Prokka	Bakta/PGAP/Prokka	Bakta/PGAP/Prokka	PGAP	PGAP	Bakta	Prokka	Prokka	Prokka	EggNOG-Mapper	EggNOG-Mapper	EggNOG-Mapper	EggNOG-Mapper
GCA_000264115.1	PGAP	Bakta	Bakta	Bakta/PGAP/Prokka	Bakta	Bakta/PGAP/Prokka	PGAP	Bakta	Bakta	Prokka	Prokka	Prokka	Bakta	EggNOG-Mapper	EggNOG-Mapper	EggNOG-Mapper
GCA_000264135.1	PGAP	Bakta	Bakta	Bakta/PGAP/Prokka	Bakta	Bakta/PGAP/Prokka	PGAP	PGAP	Bakta	Prokka	Prokka	Prokka	EggNOG-Mapper	EggNOG-Mapper	EggNOG-Mapper	EggNOG-Mapper
GCA_000264155.1	PGAP	Bakta	Bakta	Bakta/PGAP/Prokka	Bakta/PGAP/Prokka	Bakta/PGAP/Prokka	PGAP	PGAP	Bakta	Prokka	Prokka	Prokka	Bakta	EggNOG-Mapper	EggNOG-Mapper	EggNOG-Mapper
GCA_000264175.1	PGAP	Bakta	Bakta	Bakta/PGAP/Prokka	Bakta/PGAP/Prokka	Bakta/PGAP/Prokka	PGAP	PGAP	Bakta	Prokka	Prokka	Prokka	EggNOG-Mapper	EggNOG-Mapper	EggNOG-Mapper	EggNOG-Mapper
GCA_000264195.1	PGAP	Bakta	Bakta	Bakta/PGAP/Prokka	Bakta	Bakta/PGAP/Prokka	PGAP	PGAP	Bakta	Prokka	Prokka	Prokka	EggNOG-Mapper	EggNOG-Mapper	EggNOG-Mapper	EggNOG-Mapper
GCA_000264215.1	PGAP	Bakta	Bakta	Bakta/PGAP/Prokka	Bakta/PGAP/Prokka	Bakta/PGAP/Prokka	PGAP	PGAP	Bakta	Prokka	Prokka	Prokka	Bakta	Bakta	EggNOG-Mapper	EggNOG-Mapper
GCA_000264235.1	PGAP	Bakta	Bakta	Bakta/PGAP/Prokka	Bakta/PGAP/Prokka	Bakta/PGAP/Prokka	PGAP	Bakta	Bakta	Prokka	Prokka	Prokka	Bakta	EggNOG-Mapper	EggNOG-Mapper	EggNOG-Mapper
GCA_000267005.2	PGAP	Bakta	Bakta	PGAP	Bakta	Bakta/PGAP/Prokka	PGAP	PGAP	Bakta	Prokka	Prokka	Prokka	Bakta	Bakta	EggNOG-Mapper	EggNOG-Mapper
GCA_000267025.1	PGAP	Bakta	Bakta	PGAP	Bakta	Bakta/PGAP/Prokka	PGAP	Bakta	Bakta	Prokka	Prokka	Prokka	Bakta	EggNOG-Mapper	EggNOG-Mapper	EggNOG-Mapper
GCA_000267045.1	PGAP	Bakta	Bakta	PGAP	Bakta	Bakta/PGAP/Prokka	PGAP	Bakta	Bakta	Prokka	Prokka	Prokka	Bakta	EggNOG-Mapper	EggNOG-Mapper	EggNOG-Mapper
GCA_000267065.1	PGAP	Bakta	Bakta	PGAP	Bakta	Bakta/PGAP/Prokka	PGAP	Bakta	Bakta	Prokka	Prokka	Prokka	Bakta	EggNOG-Mapper	EggNOG-Mapper	EggNOG-Mapper
GCA_000267085.1	PGAP	Bakta	Bakta	PGAP	Bakta	Bakta/PGAP/Prokka	PGAP	Bakta	Bakta	Prokka	Prokka	Prokka	Bakta	EggNOG-Mapper	EggNOG-Mapper	EggNOG-Mapper
GCA_000267105.1	PGAP	Bakta	Bakta	PGAP	Bakta	Bakta/PGAP/Prokka	PGAP	Bakta	Bakta	Prokka	Prokka	Prokka	Bakta	EggNOG-Mapper	EggNOG-Mapper	EggNOG-Mapper
GCA_000267125.1	PGAP	Bakta	Bakta	PGAP	Bakta	Bakta/PGAP/Prokka	PGAP	Bakta	Bakta	Prokka	Prokka	Prokka	Bakta	EggNOG-Mapper	EggNOG-Mapper	EggNOG-Mapper
GCA_000267145.1	PGAP	Bakta	Bakta	PGAP	Bakta	Bakta/PGAP/Prokka	PGAP	Bakta	Bakta	Prokka	Prokka	Prokka	Bakta	EggNOG-Mapper	EggNOG-Mapper	EggNOG-Mapper
GCA_000267165.1	PGAP	Bakta	Bakta	PGAP	Bakta	Bakta/PGAP/Prokka	PGAP	Bakta	Bakta	Prokka	Prokka	Prokka	Bakta	EggNOG-Mapper	EggNOG-Mapper	EggNOG-Mapper
GCA_000267185.1	PGAP	Bakta	Bakta	PGAP	Bakta	Bakta/PGAP/Prokka	PGAP	Bakta	Bakta	Prokka	Prokka	Prokka	Bakta	EggNOG-Mapper	EggNOG-Mapper	EggNOG-Mapper
GCA_000267205.2	PGAP	Bakta	Bakta	PGAP	Bakta	Bakta/PGAP/Prokka	PGAP	PGAP	Bakta	Prokka	Prokka	Prokka	Bakta	Bakta	EggNOG-Mapper	EggNOG-Mapper
GCA_000267225.2	PGAP	Bakta	Bakta	PGAP	Bakta	Bakta/PGAP/Prokka	PGAP	PGAP	Bakta	Prokka	Prokka	Prokka	Bakta	Bakta	EggNOG-Mapper	EggNOG-Mapper
GCA_000267245.2	PGAP	Bakta	Bakta	PGAP	Bakta	Bakta/PGAP/Prokka	PGAP	PGAP	Bakta	Prokka	Prokka	Prokka	Bakta	Bakta	EggNOG-Mapper	EggNOG-Mapper
GCA_000267265.2	PGAP	Bakta	Bakta	PGAP	Bakta	Bakta/PGAP/Prokka	PGAP	PGAP	Bakta	Prokka	Prokka	Prokka	Bakta	Bakta	EggNOG-Mapper	EggNOG-Mapper
GCA_000267285.2	PGAP	Bakta	Bakta	PGAP	Bakta	Bakta/PGAP/Prokka	PGAP	PGAP	Bakta	Prokka	Prokka	Prokka	Bakta	Bakta	EggNOG-Mapper	EggNOG-Mapper
GCA_000267305.2	PGAP	Bakta	Bakta	PGAP	Bakta	Bakta/PGAP/Prokka	PGAP	PGAP	Bakta	Prokka	Prokka	Prokka	Bakta	Bakta	EggNOG-Mapper	EggNOG-Mapper
GCA_000267325.1	PGAP	Bakta	Bakta	PGAP	Bakta	Bakta/PGAP/Prokka	PGAP	PGAP	Bakta	Prokka	Prokka	Prokka	Bakta	Bakta	EggNOG-Mapper	EggNOG-Mapper
GCA_000267345.2	PGAP	Bakta	Bakta	PGAP	Bakta	Bakta/PGAP/Prokka	PGAP	PGAP	Bakta	Prokka	Prokka	Prokka	Bakta	Bakta	EggNOG-Mapper	EggNOG-Mapper
GCA_000267365.2	PGAP	Bakta	Bakta	PGAP	Bakta	Bakta/PGAP/Prokka	PGAP	PGAP	Bakta	Prokka	Prokka	Prokka	Bakta	Bakta	EggNOG-Mapper	EggNOG-Mapper
GCA_000267385.2	PGAP	Bakta	Bakta	PGAP	Bakta	Bakta/PGAP/Prokka	PGAP	PGAP	Bakta	Prokka	Prokka	Prokka	Bakta	Bakta	EggNOG-Mapper	EggNOG-Mapper
GCA_000267405.2	PGAP	Bakta	Bakta	PGAP	Bakta	Bakta/PGAP/Prokka	PGAP	PGAP	Bakta	Prokka	Prokka	Prokka	Bakta	Bakta	EggNOG-Mapper	EggNOG-Mapper
GCA_000267425.2	PGAP	Bakta	Bakta	PGAP	Bakta	Bakta/PGAP/Prokka	PGAP	PGAP	Bakta	Prokka	Prokka	Prokka	Bakta	Bakta	EggNOG-Mapper	EggNOG-Mapper
GCA_000267445.2	PGAP	Bakta	Bakta	PGAP	Bakta	Bakta/PGAP/Prokka	PGAP	PGAP	Bakta	Prokka	Prokka	Prokka	Bakta	Bakta	EggNOG-Mapper	EggNOG-Mapper
GCA_000267465.2	PGAP	Bakta	Bakta	PGAP	Bakta	Bakta/PGAP/Prokka	PGAP	PGAP	Bakta	Prokka	Prokka	Prokka	Bakta	Bakta	EggNOG-Mapper	EggNOG-Mapper
GCA_000267485.2	PGAP	Bakta	Bakta	PGAP	Bakta	Bakta/PGAP/Prokka	PGAP	PGAP	Bakta	Prokka	Prokka	Prokka	Bakta	Bakta	EggNOG-Mapper	EggNOG-Mapper
GCA_000267505.2	PGAP	Bakta	Bakta	PGAP	Bakta	Bakta/PGAP/Prokka	PGAP	PGAP	Bakta	Prokka	Prokka	Prokka	Bakta	Bakta	EggNOG-Mapper	EggNOG-Mapper
GCA_000267525.2	PGAP	Bakta	Bakta	PGAP	Bakta	Bakta/PGAP/Prokka	PGAP	PGAP	Bakta	Prokka	Prokka	Prokka	Bakta	Bakta	EggNOG-Mapper	EggNOG-Mapper
GCA_000267605.2	PGAP	Bakta	Bakta	PGAP	Bakta	Bakta/PGAP/Prokka	PGAP	PGAP	Bakta	Prokka	Prokka	Prokka	Bakta	Bakta	EggNOG-Mapper	EggNOG-Mapper
GCA_000267625.2	PGAP	Bakta	Bakta	PGAP	Bakta	Bakta/PGAP/Prokka	PGAP	PGAP	Bakta	Prokka	Prokka	Prokka	Bakta	Bakta	EggNOG-Mapper	EggNOG-Mapper
GCA_000267645.2	PGAP	Bakta	Bakta	PGAP	Bakta	Bakta/PGAP/Prokka	PGAP	PGAP	Bakta	Prokka	Prokka	Prokka	Bakta	Bakta	EggNOG-Mapper	EggNOG-Mapper
GCA_000267665.2	PGAP	Bakta	Bakta	PGAP	Bakta	Bakta/PGAP/Prokka	PGAP	PGAP	Bakta	Prokka	Prokka	Prokka	Bakta	Bakta	EggNOG-Mapper	EggNOG-Mapper
GCA_000267685.2	PGAP	Bakta	Bakta	PGAP	Bakta	Bakta/PGAP/Prokka	PGAP	PGAP	Bakta	Prokka	Prokka	Prokka	Bakta	Bakta	EggNOG-Mapper	EggNOG-Mapper
GCA_000267705.2	PGAP	Bakta	Bakta	PGAP	Bakta	Bakta/PGAP/Prokka	PGAP	PGAP	Bakta	Prokka	Prokka	Prokka	Bakta	Bakta	EggNOG-Mapper	EggNOG-Mapper
GCA_000267725.2	PGAP	Bakta	Bakta	PGAP	Bakta	Bakta/PGAP/Prokka	PGAP	PGAP	Bakta	Prokka	Prokka	Prokka	Bakta	Bakta	EggNOG-Mapper	EggNOG-Mapper
GCA_000267745.2	PGAP	Bakta	Bakta	PGAP	Bakta	Bakta/PGAP/Prokka	PGAP	PGAP	Bakta	Prokka	Prokka	Prokka	Bakta	Bakta	EggNOG-Mapper	EggNOG-Mapper
GCA_000267765.2	PGAP	Bakta	Bakta	PGAP	Bakta	Bakta/PGAP/Prokka	PGAP	PGAP	Bakta	Prokka	Prokka	Prokka	Bakta	Bakta	EggNOG-Mapper	EggNOG-Mapper
GCA_000267785.2	PGAP	Bakta	Bakta	PGAP	Bakta	Bakta/PGAP/Prokka	PGAP	PGAP	Bakta	Prokka	Prokka	Prokka	Bakta	Bakta	EggNOG-Mapper	EggNOG-Mapper
GCA_000267805.2	PGAP	Bakta	Bakta	PGAP	Bakta	Bakta/PGAP/Prokka	PGAP	PGAP	Bakta	Prokka	Prokka	Prokka	Bakta	Bakta	EggNOG-Mapper	EggNOG-Mapper
GCA_000267825.2	PGAP	Bakta	Bakta	PGAP	Bakta	Bakta/PGAP/Prokka	PGAP	PGAP	Bakta	Prokka	Prokka	Prokka	Bakta	Bakta	EggNOG-Mapper	EggNOG-Mapper
GCA_000267845.2	PGAP	Bakta	Bakta	PGAP	Bakta	Bakta/PGAP/Prokka	PGAP	PGAP	Bakta	Prokka	Prokka	Prokka	Bakta	Bakta	EggNOG-Mapper	EggNOG-Mapper
GCA_000267865.2	PGAP	Bakta	Bakta	PGAP	Bakta	Bakta/PGAP/Prokka	PGAP	PGAP	Bakta	Prokka	Prokka	Prokka	Bakta	Bakta	EggNOG-Mapper	EggNOG-Mapper
GCA_000267885.2	PGAP	Bakta	Bakta	PGAP	Bakta	Bakta/PGAP/Prokka	PGAP	PGAP	Bakta	Prokka	Prokka	Prokka	Bakta	Bakta	EggNOG-Mapper	EggNOG-Mapper
GCA_000267905.2	PGAP	Bakta	Bakta	PGAP	Bakta	Bakta/PGAP/Prokka	PGAP	PGAP	Bakta	Prokka	Prokka	Prokka	Bakta	Bakta	EggNOG-Mapper	EggNOG-Mapper
GCA_000267925.2	PGAP	Bakta	Bakta	PGAP	Bakta	Bakta/PGAP/Prokka	PGAP	PGAP	Bakta	Prokka	Prokka	Prokka	Bakta	Bakta	EggNOG-Mapper	EggNOG-Mapper
GCA_000267945.2	PGAP	Bakta	Bakta	PGAP	Bakta	Bakta/PGAP/Prokka	PGAP	PGAP	Bakta	Prokka	Prokka	Prokka	Bakta	Bakta	EggNOG-Mapper	EggNOG-Mapper
GCA_000267965.2	PGAP	Bakta	Bakta	Bakta/PGAP/Prokka	Bakta	Bakta/PGAP/Prokka	PGAP	PGAP	Bakta	Prokka	Prokka	Prokka	Bakta	Bakta	EggNOG-Mapper	EggNOG-Mapper
GCA_000268125.1	PGAP	Bakta	Bakta	Bakta/PGAP/Prokka	Bakta	Bakta/PGAP/Prokka	PGAP	Bakta	Bakta	PGAP	Prokka	Prokka	Bakta	EggNOG-Mapper	EggNOG-Mapper	EggNOG-Mapper
GCA_000268205.1	PGAP	Bakta	Bakta	PGAP	Bakta	Bakta/PGAP/Prokka	PGAP	Bakta	Bakta	PGAP	Prokka	Prokka	Bakta	EggNOG-Mapper	EggNOG-Mapper	EggNOG-Mapper
GCA_000269645.2	PGAP	Bakta	Bakta	PGAP	Bakta	Bakta/PGAP/Prokka	PGAP	Bakta	Bakta	Prokka	Prokka	Prokka	Bakta	Bakta	EggNOG-Mapper	EggNOG-Mapper
GCA_000270105.1	PGAP	Bakta	Bakta	Bakta/PGAP/Prokka	Bakta	Bakta/PGAP/Prokka	PGAP	Bakta	Bakta	Prokka	Prokka	Prokka	Bakta	EggNOG-Mapper	EggNOG-Mapper	EggNOG-Mapper
GCA_000273425.1	PGAP	Bakta	Bakta	Bakta/PGAP/Prokka	Bakta	Bakta/PGAP/Prokka	PGAP	Bakta	Bakta	Prokka	Prokka	Prokka	Bakta	Bakta	EggNOG-Mapper	EggNOG-Mapper
GCA_000276745.1	PGAP	Bakta	Bakta	Bakta/PGAP/Prokka	Bakta	Bakta/PGAP/Prokka	PGAP	PGAP	Bakta	Prokka	Prokka	Prokka	Bakta	EggNOG-Mapper	EggNOG-Mapper	EggNOG-Mapper
GCA_000276765.1	PGAP	Bakta	Bakta	PGAP	Bakta	Bakta/PGAP/Prokka	PGAP	Bakta	Bakta	Prokka	Prokka	Prokka	Bakta	Bakta	EggNOG-Mapper	EggNOG-Mapper
GCA_000276785.1	PGAP	Bakta	Bakta	PGAP	Bakta	Bakta/PGAP/Prokka	PGAP	PGAP	Bakta	Prokka	Prokka	Prokka	Bakta	EggNOG-Mapper	EggNOG-Mapper	EggNOG-Mapper
GCA_000276845.1	PGAP	Bakta	Bakta	Bakta/PGAP/Prokka	Bakta	Bakta/PGAP/Prokka	PGAP	PGAP	Bakta	Prokka	Prokka	Prokka	Bakta	Bakta	EggNOG-Mapper	EggNOG-Mapper
GCA_000276865.1	PGAP	Bakta	Bakta	PGAP	Bakta	Bakta/PGAP/Prokka	PGAP	PGAP	Bakta	Prokka	Prokka	Prokka	Bakta	Bakta	EggNOG-Mapper	EggNOG-Mapper
GCA_000276885.1	PGAP	Bakta	Bakta	Bakta/PGAP/Prokka	Bakta	Bakta/PGAP/Prokka	PGAP	PGAP	Bakta	Prokka	Prokka	Prokka	Bakta	Bakta	EggNOG-Mapper	EggNOG-Mapper
GCA_000276925.1	PGAP	Bakta	Bakta	PGAP	Bakta	Bakta/PGAP/Prokka	PGAP	PGAP	Bakta	Prokka	Prokka	Prokka	Bakta	Bakta	EggNOG-Mapper	EggNOG-Mapper
GCA_000276945.1	PGAP	Bakta	Bakta	PGAP	Bakta	Bakta/PGAP/Prokka	PGAP	PGAP	Bakta	Prokka	Prokka	Prokka	Bakta	Bakta	EggNOG-Mapper	EggNOG-Mapper
GCA_000281775.1	PGAP	Bakta	Bakta	PGAP	Bakta	Bakta/PGAP/Prokka	PGAP	Bakta	Bakta	Prokka	Prokka	Prokka	Bakta	EggNOG-Mapper	EggNOG-Mapper	EggNOG-Mapper
GCA_000284495.1	PGAP	Bakta	Bakta	Bakta/PGAP/Prokka	Bakta	Bakta/PGAP/Prokka	PGAP	Bakta	Bakta	Prokka	Prokka	Prokka	Bakta	EggNOG-Mapper	EggNOG-Mapper	EggNOG-Mapper
GCA_000285375.1	PGAP	Bakta	Bakta	PGAP	Bakta	Bakta/PGAP/Prokka	PGAP	Bakta	Bakta	EggNOG-Mapper	Prokka	EggNOG-Mapper	Bakta	EggNOG-Mapper	EggNOG-Mapper	EggNOG-Mapper
GCA_000285655.3	PGAP	Bakta	Bakta	Bakta/PGAP/Prokka	Bakta	Bakta/PGAP/Prokka	PGAP	Bakta	Bakta	Prokka	Prokka	Prokka	Bakta	EggNOG-Mapper	EggNOG-Mapper	EggNOG-Mapper
GCA_000295775.2	PGAP	Bakta	Bakta	PGAP	Bakta	Bakta/PGAP/Prokka	PGAP	PGAP	Bakta	Prokka	Prokka	EggNOG-Mapper	EggNOG-Mapper	EggNOG-Mapper	EggNOG-Mapper	EggNOG-Mapper
GCA_000297235.3	PGAP	Bakta	Bakta	Bakta/PGAP/Prokka	Bakta/PGAP/Prokka	Bakta/PGAP/Prokka	PGAP	Bakta	Bakta	EggNOG-Mapper	Prokka	EggNOG-Mapper	Bakta	EggNOG-Mapper	EggNOG-Mapper	EggNOG-Mapper
GCA_000299255.1	PGAP	Bakta	Bakta	Bakta/PGAP/Prokka	Bakta	Bakta/PGAP/Prokka	PGAP	Bakta	Bakta	PGAP	Prokka	Prokka	Bakta	EggNOG-Mapper	EggNOG-Mapper	EggNOG-Mapper
GCA_000299255.1	PGAP	Bakta	Bakta	Bakta/PGAP/Prokka	Bakta	Bakta/PGAP/Prokka	PGAP	Bakta	Bakta	PGAP	Prokka	Prokka	Bakta	EggNOG-Mapper	EggNOG-Mapper	EggNOG-Mapper
GCA_000299455.1	PGAP	Bakta	Bakta	Bakta/PGAP/Prokka	Bakta	Bakta/PGAP/Prokka	PGAP	Bakta	Bakta	PGAP	Prokka	Prokka	Bakta	EggNOG-Mapper	EggNOG-Mapper	EggNOG-Mapper
GCA_000299455.1	PGAP	Bakta	Bakta	Bakta/PGAP/Prokka	Bakta	Bakta/PGAP/Prokka	PGAP	Bakta	Bakta	PGAP	Prokka	Prokka	Bakta	EggNOG-Mapper	EggNOG-Mapper	EggNOG-Mapper
GCA_000299475.1	PGAP	Bakta	Bakta	Bakta/PGAP/Prokka	Bakta	Bakta/PGAP/Prokka	PGAP	Bakta	Bakta	PGAP	Prokka	Prokka	Bakta	EggNOG-Mapper	EggNOG-Mapper	EggNOG-Mapper
GCA_000302715.1	PGAP	Bakta	Bakta	PGAP	Bakta	Bakta/PGAP/Prokka	PGAP	Bakta	Bakta	Prokka	Prokka	Prokka	Bakta	EggNOG-Mapper	EggNOG-Mapper	EggNOG-Mapper
GCA_000302735.1	PGAP	Bakta	Bakta	PGAP	Bakta	Bakta/PGAP/Prokka	PGAP	Bakta	Bakta	Prokka	Prokka	Prokka	Bakta	EggNOG-Mapper	EggNOG-Mapper	EggNOG-Mapper
GCA_000303235.2	PGAP	Bakta	Bakta	PGAP	Bakta	Bakta/PGAP/Prokka	PGAP	PGAP	Bakta	Prokka	Prokka	Prokka	Bakta	Bakta	EggNOG-Mapper	EggNOG-Mapper
GCA_000303255.2	PGAP	Bakta	Bakta	PGAP	Bakta	Bakta/PGAP/Prokka	PGAP	Bakta	Bakta	Prokka	Prokka	Prokka	Bakta	EggNOG-Mapper	EggNOG-Mapper	EggNOG-Mapper
GCA_000303275.2	PGAP	Bakta	Bakta	PGAP	Bakta	Bakta/PGAP/Prokka	PGAP	PGAP	Bakta	Prokka	Prokka	Prokka	Bakta	Bakta	EggNOG-Mapper	EggNOG-Mapper
GCA_000303295.2	PGAP	Bakta	Bakta	PGAP	Bakta	Bakta/PGAP/Prokka	PGAP	PGAP	Bakta	Prokka	Prokka	Prokka	Bakta	Bakta	EggNOG-Mapper	EggNOG-Mapper
GCA_000303315.2	PGAP	Bakta	Bakta	PGAP	Bakta	Bakta/PGAP/Prokka	PGAP	PGAP	Bakta	Prokka	Prokka	Prokka	Bakta	Bakta	EggNOG-Mapper	EggNOG-Mapper
GCA_000303335.2	PGAP	Bakta	Bakta	PGAP	Bakta	Bakta/PGAP/Prokka	PGAP	PGAP	Bakta	Prokka	Prokka	Prokka	Bakta	Bakta	EggNOG-Mapper	EggNOG-Mapper
GCA_000303355.2	PGAP	Bakta	Bakta	PGAP	Bakta	Bakta/PGAP/Prokka	PGAP	PGAP	Bakta	Prokka	Prokka	Prokka	Bakta	Bakta	EggNOG-Mapper	EggNOG-Mapper
GCA_000303375.2	PGAP	Bakta	Bakta	PGAP	Bakta	Bakta/PGAP/Prokka	PGAP	PGAP	Bakta	Prokka	Prokka	Prokka	Bakta	Bakta	EggNOG-Mapper	EggNOG-Mapper
GCA_000303395.2	PGAP	Bakta	Bakta	PGAP	Bakta	Bakta/PGAP/Prokka	PGAP	PGAP	Bakta	Prokka	Prokka	Prokka	Bakta	Bakta	EggNOG-Mapper	EggNOG-Mapper
GCA_000303415.2	PGAP	Bakta	Bakta	PGAP	Bakta	Bakta/PGAP/Prokka	PGAP	PGAP	Bakta	Prokka	Prokka	Prokka	Bakta	Bakta	EggNOG-Mapper	EggNOG-Mapper
GCA_000303435.2	PGAP	Bakta	Bakta	PGAP	Bakta	Bakta/PGAP/Prokka	PGAP	PGAP	Bakta	Prokka	Prokka	Prokka	Bakta	Bakta	EggNOG-Mapper	EggNOG-Mapper
GCA_000303455.2	PGAP	Bakta	Bakta	PGAP	Bakta	Bakta/PGAP/Prokka	PGAP	PGAP	Bakta	Prokka	Prokka	Prokka	Bakta	Bakta	EggNOG-Mapper	EggNOG-Mapper
GCA_000303475.2	PGAP	Bakta	Bakta	PGAP	Bakta	Bakta/PGAP/Prokka	PGAP	PGAP	Bakta	Prokka	Prokka	Prokka	Bakta	Bakta	EggNOG-Mapper	EggNOG-Mapper
GCA_000303495.2	PGAP	Bakta	Bakta	PGAP	Bakta	Bakta/PGAP/Prokka	PGAP	PGAP	Bakta	Prokka	Prokka	Prokka	Bakta	Bakta	EggNOG-Mapper	EggNOG-Mapper
GCA_000303515.2	PGAP	Bakta	Bakta	PGAP	Bakta	Bakta/PGAP/Prokka	PGAP	PGAP	Bakta	Prokka	Prokka	Prokka	Bakta	Bakta	EggNOG-Mapper	EggNOG-Mapper
GCA_000303535.2	PGAP	Bakta	Bakta	PGAP	Bakta	Bakta/PGAP/Prokka	PGAP	PGAP	Bakta	Prokka	Prokka	Prokka	Bakta	Bakta	EggNOG-Mapper	EggNOG-Mapper
GCA_000303555.2	PGAP	Bakta	Bakta	PGAP	Bakta	Bakta/PGAP/Prokka	PGAP	PGAP	Bakta	Prokka	Prokka	Prokka	Bakta	Bakta	EggNOG-Mapper	EggNOG-Mapper
GCA_000303575.2	PGAP	Bakta	Bakta	PGAP	Bakta	Bakta/PGAP/Prokka	PGAP	PGAP	Bakta	Prokka	Prokka	Prokka	Bakta	Bakta	EggNOG-Mapper	EggNOG-Mapper
GCA_000303595.2	PGAP	Bakta	Bakta	PGAP	Bakta	Bakta/PGAP/Prokka	PGAP	PGAP	Bakta	Prokka	Prokka	Prokka	Bakta	Bakta	EggNOG-Mapper	EggNOG-Mapper
GCA_000303615.2	PGAP	Bakta	Bakta	PGAP	Bakta	Bakta/PGAP/Prokka	PGAP	PGAP	Bakta	Prokka	Prokka	Prokka	Bakta	Bakta	EggNOG-Mapper	EggNOG-Mapper
GCA_000303635.2	PGAP	Bakta	Bakta	PGAP	Bakta	Bakta/PGAP/Prokka	PGAP	PGAP	Bakta	Prokka	Prokka	Prokka	Bakta	EggNOG-Mapper	EggNOG-Mapper	EggNOG-Mapper
GCA_000303655.2	PGAP	Bakta	Bakta	PGAP	Bakta	Bakta/PGAP/Prokka	PGAP	Bakta	Bakta	Prokka	Prokka	Prokka	EggNOG-Mapper	EggNOG-Mapper	EggNOG-Mapper	EggNOG-Mapper
GCA_000303675.2	PGAP	Bakta	Bakta	PGAP	Bakta	Bakta/PGAP/Prokka	PGAP	PGAP	Bakta	Prokka	Prokka	Prokka	Bakta	Bakta	EggNOG-Mapper	EggNOG-Mapper
GCA_000303695.2	PGAP	Bakta	Bakta	PGAP	Bakta	Bakta/PGAP/Prokka	PGAP	PGAP	Bakta	Prokka	Prokka	Prokka	Bakta	Bakta	EggNOG-Mapper	EggNOG-Mapper
GCA_000303715.2	PGAP	Bakta	Bakta	PGAP	Bakta	Bakta/PGAP/Prokka	PGAP	PGAP	Bakta	Prokka	Prokka	Prokka	Bakta	Bakta	EggNOG-Mapper	EggNOG-Mapper
GCA_000303735.2	PGAP	Bakta	Bakta	PGAP	Bakta	Bakta/PGAP/Prokka	PGAP	PGAP	Bakta	Prokka	Prokka	Prokka	Bakta	Bakta	EggNOG-Mapper	EggNOG-Mapper
GCA_000303755.2	PGAP	Bakta	Bakta	PGAP	Bakta	Bakta/PGAP/Prokka	PGAP	PGAP	Bakta	Prokka	Prokka	Prokka	Bakta	Bakta	EggNOG-Mapper	EggNOG-Mapper
GCA_000303775.2	PGAP	Bakta	Bakta	Bakta/PGAP/Prokka	Bakta	Bakta/PGAP/Prokka	PGAP	PGAP	Bakta	Prokka	Prokka	Prokka	Bakta	Bakta	EggNOG-Mapper	EggNOG-Mapper
GCA_000303795.2	PGAP	Bakta	Bakta	PGAP	Bakta	Bakta/PGAP/Prokka	PGAP	PGAP	Bakta	Prokka	Prokka	Prokka	Bakta	Bakta	EggNOG-Mapper	EggNOG-Mapper
GCA_000303815.2	PGAP	Bakta	Bakta	PGAP	Bakta	Bakta/PGAP/Prokka	PGAP	PGAP	Bakta	Prokka	Prokka	Prokka	Bakta	Bakta	EggNOG-Mapper	EggNOG-Mapper
GCA_000303835.2	PGAP	Bakta	Bakta	PGAP	Bakta	Bakta/PGAP/Prokka	PGAP	PGAP	Bakta	Prokka	Prokka	Prokka	Bakta	Bakta	EggNOG-Mapper	EggNOG-Mapper
GCA_000303855.2	PGAP	Bakta	Bakta	PGAP	Bakta	Bakta/PGAP/Prokka	PGAP	PGAP	Bakta	Prokka	Prokka	Prokka	Bakta	Bakta	EggNOG-Mapper	EggNOG-Mapper
GCA_000303875.2	PGAP	Bakta	Bakta	PGAP	Bakta	Bakta/PGAP/Prokka	PGAP	PGAP	Bakta	Prokka	Prokka	Prokka	Bakta	Bakta	EggNOG-Mapper	EggNOG-Mapper
GCA_000303895.2	PGAP	Bakta	Bakta	PGAP	Bakta	Bakta/PGAP/Prokka	PGAP	PGAP	Bakta	Prokka	Prokka	Prokka	Bakta	Bakta	EggNOG-Mapper	EggNOG-Mapper
GCA_000303915.2	PGAP	Bakta	Bakta	PGAP	Bakta	Bakta/PGAP/Prokka	PGAP	PGAP	Bakta	Prokka	Prokka	Prokka	Bakta	Bakta	EggNOG-Mapper	EggNOG-Mapper
GCA_000303935.2	PGAP	Bakta	Bakta	PGAP	Bakta	Bakta/PGAP/Prokka	PGAP	PGAP	Bakta	Prokka	Prokka	Prokka	Bakta	Bakta	EggNOG-Mapper	EggNOG-Mapper
GCA_000303955.2	PGAP	Bakta	Bakta	PGAP	Bakta	Bakta/PGAP/Prokka	PGAP	PGAP	Bakta	Prokka	Prokka	Prokka	Bakta	Bakta	EggNOG-Mapper	EggNOG-Mapper
GCA_000303975.2	PGAP	Bakta	Bakta	Bakta/PGAP/Prokka	Bakta	Bakta/PGAP/Prokka	PGAP	PGAP	Bakta	Prokka	Prokka	Prokka	Bakta	Bakta	EggNOG-Mapper	EggNOG-Mapper
GCA_000303995.2	PGAP	Bakta	Bakta	PGAP	Bakta	Bakta/PGAP/Prokka	PGAP	Bakta	Bakta	Prokka	Prokka	Prokka	Bakta	Bakta	EggNOG-Mapper	EggNOG-Mapper
GCA_000304015.2	PGAP	Bakta	Bakta	PGAP	Bakta	Bakta/PGAP/Prokka	PGAP	PGAP	Bakta	Prokka	Prokka	Prokka	Bakta	Bakta	EggNOG-Mapper	EggNOG-Mapper
GCA_000304035.2	PGAP	Bakta	Bakta	PGAP	Bakta	Bakta/PGAP/Prokka	PGAP	PGAP	Bakta	Prokka	Prokka	Prokka	Bakta	Bakta	EggNOG-Mapper	EggNOG-Mapper
GCA_000304055.2	PGAP	Bakta	Bakta	PGAP	Bakta	Bakta/PGAP/Prokka	PGAP	PGAP	Bakta	Prokka	Prokka	Prokka	Bakta	Bakta	EggNOG-Mapper	EggNOG-Mapper
GCA_000304075.2	PGAP	Bakta	Bakta	PGAP	Bakta	Bakta/PGAP/Prokka	PGAP	Bakta	Bakta	Prokka	Prokka	Prokka	Bakta	Bakta	EggNOG-Mapper	EggNOG-Mapper
GCA_000304095.2	PGAP	Bakta	Bakta	PGAP	Bakta	Bakta/PGAP/Prokka	PGAP	PGAP	Bakta	Prokka	Prokka	Prokka	Bakta	EggNOG-Mapper	EggNOG-Mapper	EggNOG-Mapper
GCA_000304115.2	PGAP	Bakta	Bakta	PGAP	Bakta	Bakta/PGAP/Prokka	PGAP	Bakta	Bakta	Prokka	Prokka	Prokka	Bakta	EggNOG-Mapper	EggNOG-Mapper	EggNOG-Mapper
GCA_000304135.2	PGAP	Bakta	Bakta	PGAP	Bakta	Bakta/PGAP/Prokka	PGAP	Bakta	Bakta	Prokka	Prokka	Prokka	Bakta	EggNOG-Mapper	EggNOG-Mapper	EggNOG-Mapper
GCA_000304255.1	PGAP	Bakta	Bakta	Bakta/PGAP/Prokka	Bakta	Bakta/PGAP/Prokka	PGAP	Bakta	Bakta	Prokka	Prokka	Prokka	Bakta	EggNOG-Mapper	EggNOG-Mapper	EggNOG-Mapper
GCA_000304815.2	PGAP	Bakta	Bakta	PGAP	Bakta	Bakta/PGAP/Prokka	PGAP	PGAP	Bakta	Prokka	Prokka	Prokka	Bakta	Bakta	EggNOG-Mapper	EggNOG-Mapper
GCA_000304835.2	PGAP	Bakta	Bakta	PGAP	Bakta	Bakta/PGAP/Prokka	PGAP	Bakta	Bakta	Prokka	Prokka	Prokka	Bakta	EggNOG-Mapper	EggNOG-Mapper	EggNOG-Mapper
GCA_000304855.2	PGAP	Bakta	Bakta	PGAP	Bakta	Bakta/PGAP/Prokka	PGAP	Bakta	Bakta	Prokka	Prokka	Prokka	Bakta	EggNOG-Mapper	EggNOG-Mapper	EggNOG-Mapper
GCA_000304875.2	PGAP	Bakta	Bakta	PGAP	Bakta	Bakta/PGAP/Prokka	PGAP	PGAP	Bakta	Prokka	Prokka	Prokka	Bakta	Bakta	EggNOG-Mapper	EggNOG-Mapper
GCA_000305155.2	PGAP	Bakta	Bakta	PGAP	Bakta	Bakta/PGAP/Prokka	PGAP	PGAP	Bakta	Prokka	Prokka	Prokka	Bakta	Bakta	EggNOG-Mapper	EggNOG-Mapper
GCA_000305175.1	PGAP	Bakta	Bakta	PGAP	Bakta	Bakta/PGAP/Prokka	PGAP	Bakta	Bakta	Prokka	Prokka	Prokka	Bakta	EggNOG-Mapper	EggNOG-Mapper	EggNOG-Mapper
GCA_000305355.1	PGAP	Bakta	Bakta	PGAP	Bakta	Bakta/PGAP/Prokka	PGAP	Bakta	Bakta	Prokka	Prokka	Prokka	Bakta	EggNOG-Mapper	EggNOG-Mapper	EggNOG-Mapper
GCA_000305375.2	PGAP	Bakta	Bakta	PGAP	Bakta	Bakta/PGAP/Prokka	PGAP	PGAP	Bakta	Prokka	Prokka	Prokka	Bakta	Bakta	EggNOG-Mapper	EggNOG-Mapper
GCA_000305395.2	PGAP	Bakta	Bakta	PGAP	Bakta	Bakta/PGAP/Prokka	PGAP	PGAP	Bakta	Prokka	Prokka	Prokka	Bakta	Bakta	EggNOG-Mapper	EggNOG-Mapper
GCA_000305415.2	PGAP	Bakta	Bakta	PGAP	Bakta	Bakta/PGAP/Prokka	PGAP	PGAP	Bakta	Prokka	Prokka	Prokka	Bakta	Bakta	EggNOG-Mapper	EggNOG-Mapper
GCA_000305435.2	PGAP	Bakta	Bakta	PGAP	Bakta	Bakta/PGAP/Prokka	PGAP	PGAP	Bakta	Prokka	Prokka	Prokka	Bakta	Bakta	EggNOG-Mapper	EggNOG-Mapper
GCA_000305455.2	PGAP	Bakta	Bakta	PGAP	Bakta	Bakta/PGAP/Prokka	PGAP	PGAP	Bakta	Prokka	Prokka	Prokka	Bakta	Bakta	EggNOG-Mapper	EggNOG-Mapper
GCA_000307205.1	PGAP	Bakta	Bakta	Bakta/Prokka	Bakta	Bakta/PGAP/Prokka	PGAP	Bakta	Bakta	Prokka	Prokka	Prokka	Bakta	EggNOG-Mapper	EggNOG-Mapper	EggNOG-Mapper
GCA_000308975.2	PGAP	Bakta	Bakta	Bakta/PGAP/Prokka	Bakta	Bakta/PGAP/Prokka	PGAP	Bakta	Bakta	EggNOG-Mapper	Prokka	Prokka	Bakta	EggNOG-Mapper	EggNOG-Mapper	EggNOG-Mapper
GCA_000313405.1	PGAP	Bakta	Bakta	PGAP	Bakta	Bakta/PGAP/Prokka	PGAP	Bakta	Bakta	Prokka	Prokka	Prokka	Bakta	EggNOG-Mapper	EggNOG-Mapper	EggNOG-Mapper
GCA_000313425.1	PGAP	Bakta	Bakta	PGAP	Bakta	Bakta/PGAP/Prokka	PGAP	PGAP	Bakta	Prokka	Prokka	Prokka	Bakta	EggNOG-Mapper	EggNOG-Mapper	EggNOG-Mapper
GCA_000313445.1	PGAP	Bakta	Bakta	PGAP	Bakta	Bakta/PGAP/Prokka	PGAP	PGAP	Bakta	Prokka	Prokka	Prokka	Bakta	EggNOG-Mapper	EggNOG-Mapper	EggNOG-Mapper
GCA_000316325.2	PGAP	Bakta	Bakta	PGAP	Bakta	Bakta/PGAP/Prokka	PGAP	PGAP	Bakta	Prokka	Prokka	Prokka	Bakta	Bakta	EggNOG-Mapper	EggNOG-Mapper
GCA_000316345.2	PGAP	Bakta	Bakta	PGAP	Bakta	Bakta/PGAP/Prokka	PGAP	PGAP	Bakta	Prokka	Prokka	Prokka	Bakta	Bakta	EggNOG-Mapper	EggNOG-Mapper
GCA_000316365.2	PGAP	Bakta	Bakta	PGAP	Bakta	Bakta/PGAP/Prokka	PGAP	PGAP	Bakta	Prokka	Prokka	Prokka	Bakta	Bakta	EggNOG-Mapper	EggNOG-Mapper
GCA_000316385.2	PGAP	Bakta	Bakta	PGAP	Bakta	Bakta/PGAP/Prokka	PGAP	PGAP	Bakta	Prokka	Prokka	Prokka	Bakta	Bakta	EggNOG-Mapper	EggNOG-Mapper
GCA_000316405.2	PGAP	Bakta	Bakta	PGAP	Bakta	Bakta/PGAP/Prokka	PGAP	PGAP	Bakta	Prokka	Prokka	Prokka	Bakta	Bakta	EggNOG-Mapper	EggNOG-Mapper
GCA_000316425.2	PGAP	Bakta	Bakta	PGAP	Bakta	Bakta/PGAP/Prokka	PGAP	PGAP	Bakta	Prokka	Prokka	Prokka	Bakta	Bakta	EggNOG-Mapper	EggNOG-Mapper
GCA_000316445.2	PGAP	Bakta	Bakta	PGAP	Bakta	Bakta/PGAP/Prokka	PGAP	PGAP	Bakta	Prokka	Prokka	Prokka	Bakta	Bakta	EggNOG-Mapper	EggNOG-Mapper
GCA_000316465.1	PGAP	Bakta	Bakta	PGAP	Bakta	Bakta/PGAP/Prokka	PGAP	PGAP	Bakta	Prokka	Prokka	Prokka	Bakta	Bakta	EggNOG-Mapper	EggNOG-Mapper
GCA_000316485.1	PGAP	Bakta	Bakta	PGAP	Bakta	Bakta/PGAP/Prokka	PGAP	PGAP	Bakta	Prokka	Prokka	Prokka	Bakta	Bakta	EggNOG-Mapper	EggNOG-Mapper
GCA_000316505.2	PGAP	Bakta	Bakta	Bakta/PGAP/Prokka	Bakta	Bakta/PGAP/Prokka	PGAP	PGAP	Bakta	Prokka	Prokka	Prokka	EggNOG-Mapper	EggNOG-Mapper	EggNOG-Mapper	EggNOG-Mapper
GCA_000316545.2	PGAP	Bakta	Bakta	PGAP	Bakta	Bakta/PGAP/Prokka	PGAP	Bakta	Bakta	Prokka	Prokka	Prokka	Bakta	Bakta	EggNOG-Mapper	EggNOG-Mapper
GCA_000316565.2	PGAP	Bakta	Bakta	PGAP	Bakta	Bakta/PGAP/Prokka	PGAP	Bakta	Bakta	Prokka	Prokka	Prokka	Bakta	EggNOG-Mapper	EggNOG-Mapper	EggNOG-Mapper
GCA_000316705.2	PGAP	Bakta	Bakta	Bakta/PGAP/Prokka	Bakta	Bakta/PGAP/Prokka	PGAP	PGAP	Bakta	Prokka	Prokka	Prokka	Bakta	Bakta	EggNOG-Mapper	EggNOG-Mapper
GCA_000316725.2	PGAP	Bakta	Bakta	Bakta/PGAP/Prokka	Bakta	Bakta/PGAP/Prokka	PGAP	PGAP	Bakta	Prokka	Prokka	Prokka	EggNOG-Mapper	EggNOG-Mapper	EggNOG-Mapper	EggNOG-Mapper
GCA_000316745.2	PGAP	Bakta	Bakta	Bakta/PGAP/Prokka	Bakta	Bakta/PGAP/Prokka	PGAP	Bakta	Bakta	Prokka	Prokka	Prokka	Bakta	EggNOG-Mapper	EggNOG-Mapper	EggNOG-Mapper
GCA_000316765.2	PGAP	Bakta	Bakta	PGAP	Bakta	Bakta/PGAP/Prokka	PGAP	PGAP	Bakta	Prokka	Prokka	Prokka	Bakta	Bakta	EggNOG-Mapper	EggNOG-Mapper
GCA_000316785.2	PGAP	Bakta	Bakta	Bakta/PGAP/Prokka	Bakta	Bakta/PGAP/Prokka	PGAP	PGAP	Bakta	Prokka	Prokka	Prokka	Bakta	Bakta	EggNOG-Mapper	EggNOG-Mapper
GCA_000316805.2	PGAP	Bakta	Bakta	PGAP	Bakta	Bakta/PGAP/Prokka	PGAP	PGAP	Bakta	Prokka	Prokka	Prokka	Bakta	EggNOG-Mapper	EggNOG-Mapper	EggNOG-Mapper
GCA_000316825.2	PGAP	Bakta	Bakta	PGAP	Bakta	Bakta/PGAP/Prokka	PGAP	PGAP	Bakta	Prokka	Prokka	Prokka	Bakta	Bakta	EggNOG-Mapper	EggNOG-Mapper
GCA_000316845.2	PGAP	Bakta	Bakta	Bakta/PGAP/Prokka	Bakta	Bakta/PGAP/Prokka	PGAP	PGAP	Bakta	Prokka	Prokka	Prokka	Bakta	Bakta	EggNOG-Mapper	EggNOG-Mapper
GCA_000316865.2	PGAP	Bakta	Bakta	PGAP	Bakta	Bakta/PGAP/Prokka	PGAP	PGAP	Bakta	Prokka	Prokka	Prokka	Bakta	Bakta	EggNOG-Mapper	EggNOG-Mapper
GCA_000316885.2	PGAP	Bakta	Bakta	PGAP	Bakta	Bakta/PGAP/Prokka	PGAP	PGAP	Bakta	Prokka	Prokka	Prokka	Bakta	Bakta	EggNOG-Mapper	EggNOG-Mapper
GCA_000316905.2	PGAP	Bakta	Bakta	PGAP	Bakta	Bakta/PGAP/Prokka	PGAP	PGAP	Bakta	Prokka	Prokka	Prokka	Bakta	Bakta	EggNOG-Mapper	EggNOG-Mapper
GCA_000317395.1	PGAP	Bakta	Bakta	Bakta/PGAP/Prokka	Bakta/PGAP/Prokka	Bakta/PGAP/Prokka	PGAP	Bakta	Bakta	EggNOG-Mapper	Prokka	EggNOG-Mapper	Bakta	EggNOG-Mapper	EggNOG-Mapper	EggNOG-Mapper
GCA_000318425.2	PGAP	Bakta	Bakta	PGAP	Bakta	Bakta/PGAP/Prokka	PGAP	PGAP	Bakta	Prokka	Prokka	Prokka	Bakta	Bakta	EggNOG-Mapper	EggNOG-Mapper
GCA_000318445.2	PGAP	Bakta	Bakta	PGAP	Bakta	Bakta/PGAP/Prokka	PGAP	PGAP	Bakta	Prokka	Prokka	Prokka	Bakta	Bakta	EggNOG-Mapper	EggNOG-Mapper
GCA_000319835.1	PGAP	Bakta	Bakta	Bakta/PGAP/Prokka	Bakta	Bakta/PGAP/Prokka	PGAP	Bakta	Bakta	PGAP	Prokka	Prokka	Bakta	EggNOG-Mapper	EggNOG-Mapper	EggNOG-Mapper
GCA_000319855.1	PGAP	Bakta	Bakta	Prokka	Bakta	Bakta/PGAP/Prokka	PGAP	Bakta	Bakta	EggNOG-Mapper	Prokka	Prokka	Bakta	EggNOG-Mapper	EggNOG-Mapper	EggNOG-Mapper
GCA_000319875.1	PGAP	Bakta	Bakta	Bakta/PGAP/Prokka	Bakta	Bakta/PGAP/Prokka	PGAP	Bakta	Bakta	EggNOG-Mapper	Prokka	Prokka	Bakta	EggNOG-Mapper	EggNOG-Mapper	EggNOG-Mapper
GCA_000319915.1	PGAP	Bakta	Bakta	Prokka	Bakta	Bakta/PGAP/Prokka	PGAP	Bakta	Bakta	PGAP	Prokka	Prokka	Bakta	EggNOG-Mapper	EggNOG-Mapper	EggNOG-Mapper
GCA_000319935.1	PGAP	Bakta	Bakta	Bakta/PGAP/Prokka	Bakta	Bakta/PGAP/Prokka	PGAP	Bakta	Bakta	EggNOG-Mapper	Prokka	Prokka	Bakta	EggNOG-Mapper	EggNOG-Mapper	EggNOG-Mapper
GCA_000319955.1	PGAP	Bakta	Bakta	Prokka	Bakta	Bakta/PGAP/Prokka	PGAP	Bakta	Bakta	EggNOG-Mapper	Prokka	Prokka	Bakta	EggNOG-Mapper	EggNOG-Mapper	EggNOG-Mapper
GCA_000319975.1	PGAP	Bakta	Bakta	Prokka	Bakta	Bakta/PGAP/Prokka	PGAP	Bakta	Bakta	EggNOG-Mapper	Prokka	Prokka	Bakta	EggNOG-Mapper	EggNOG-Mapper	EggNOG-Mapper
GCA_000319995.1	PGAP	Bakta	Bakta	Bakta/PGAP/Prokka	Bakta	Bakta/PGAP/Prokka	PGAP	Bakta	Bakta	PGAP	Prokka	Prokka	Bakta	EggNOG-Mapper	EggNOG-Mapper	EggNOG-Mapper
GCA_000320015.1	PGAP	Bakta	Bakta	Bakta/PGAP/Prokka	Bakta	Bakta/PGAP/Prokka	PGAP	Bakta	Bakta	PGAP	Prokka	Prokka	Bakta	EggNOG-Mapper	EggNOG-Mapper	EggNOG-Mapper
GCA_000320035.1	PGAP	Bakta	Bakta	Bakta/PGAP/Prokka	Bakta	Bakta/PGAP/Prokka	PGAP	Bakta	Bakta	PGAP	Prokka	Prokka	Bakta	EggNOG-Mapper	EggNOG-Mapper	EggNOG-Mapper
GCA_000320045.1	PGAP	Bakta	Bakta	PGAP	Bakta	Bakta/PGAP/Prokka	PGAP	Bakta	Bakta	EggNOG-Mapper	Prokka	Prokka	Bakta	EggNOG-Mapper	EggNOG-Mapper	EggNOG-Mapper
GCA_000320075.1	PGAP	Bakta	Bakta	Bakta/PGAP/Prokka	Bakta	Bakta/PGAP/Prokka	PGAP	Bakta	Bakta	PGAP	Prokka	Prokka	Bakta	EggNOG-Mapper	EggNOG-Mapper	EggNOG-Mapper
GCA_000320095.1	PGAP	Bakta	Bakta	Bakta/PGAP/Prokka	Bakta	Bakta/PGAP/Prokka	PGAP	Bakta	Bakta	PGAP	Prokka	Prokka	Bakta	EggNOG-Mapper	EggNOG-Mapper	EggNOG-Mapper
GCA_000320115.1	PGAP	Bakta	Bakta	Bakta/PGAP/Prokka	Bakta	Bakta/PGAP/Prokka	PGAP	Bakta	Bakta	PGAP	Prokka	Prokka	Bakta	EggNOG-Mapper	EggNOG-Mapper	EggNOG-Mapper
GCA_000320135.1	PGAP	Bakta	Bakta	Bakta/PGAP/Prokka	Bakta	Bakta/PGAP/Prokka	PGAP	Bakta	Bakta	PGAP	Prokka	Prokka	Bakta	EggNOG-Mapper	EggNOG-Mapper	EggNOG-Mapper
GCA_000320155.1	PGAP	Bakta	Bakta	Bakta/PGAP/Prokka	Bakta	Bakta/PGAP/Prokka	PGAP	Bakta	Bakta	PGAP	Prokka	Prokka	Bakta	EggNOG-Mapper	EggNOG-Mapper	EggNOG-Mapper
GCA_000320175.1	PGAP	Bakta	Bakta	Bakta/PGAP/Prokka	Bakta	Bakta/PGAP/Prokka	PGAP	Bakta	Bakta	PGAP	Prokka	Prokka	Bakta	EggNOG-Mapper	EggNOG-Mapper	EggNOG-Mapper
GCA_000320195.1	PGAP	Bakta	Bakta	Bakta/Prokka	Bakta	Bakta/PGAP/Prokka	PGAP	Bakta	Bakta	EggNOG-Mapper	Prokka	Prokka	Bakta	EggNOG-Mapper	EggNOG-Mapper	EggNOG-Mapper
GCA_000320215.1	PGAP	Bakta	Bakta	Prokka	Bakta	Bakta/PGAP/Prokka	PGAP	Bakta	Bakta	EggNOG-Mapper	Prokka	Prokka	Bakta	EggNOG-Mapper	EggNOG-Mapper	EggNOG-Mapper
GCA_000320235.1	PGAP	Bakta	Bakta	PGAP	Bakta	Bakta/PGAP/Prokka	PGAP	Bakta	Bakta	EggNOG-Mapper	Prokka	Prokka	Bakta	EggNOG-Mapper	EggNOG-Mapper	EggNOG-Mapper
GCA_000320255.1	PGAP	Bakta	Bakta	Prokka	Bakta	Bakta/PGAP/Prokka	PGAP	Bakta	Bakta	PGAP	Prokka	Prokka	Bakta	EggNOG-Mapper	EggNOG-Mapper	EggNOG-Mapper
GCA_000320275.1	PGAP	Bakta	Bakta	Prokka	Bakta	Bakta/PGAP/Prokka	PGAP	Bakta	Bakta	EggNOG-Mapper	Prokka	Prokka	Bakta	EggNOG-Mapper	EggNOG-Mapper	EggNOG-Mapper
GCA_000321145.1	PGAP	Bakta	Bakta	PGAP	Bakta	Bakta/PGAP/Prokka	PGAP	Bakta	Bakta	Prokka	Prokka	EggNOG-Mapper	Bakta	EggNOG-Mapper	EggNOG-Mapper	EggNOG-Mapper
GCA_000326145.1	PGAP	Bakta	Bakta	Bakta/PGAP/Prokka	Bakta	Bakta/PGAP/Prokka	PGAP	Bakta	Bakta	Prokka	Prokka	Prokka	Bakta	EggNOG-Mapper	EggNOG-Mapper	EggNOG-Mapper
GCA_000326165.1	PGAP	Bakta	Bakta	Bakta/PGAP/Prokka	Bakta	Bakta/PGAP/Prokka	PGAP	Bakta	Bakta	Prokka	Prokka	Prokka	Bakta	EggNOG-Mapper	EggNOG-Mapper	EggNOG-Mapper
GCA_000326185.1	PGAP	Bakta	Bakta	Bakta/PGAP/Prokka	Bakta	Bakta/PGAP/Prokka	PGAP	Bakta	Bakta	Prokka	Prokka	Prokka	Bakta	EggNOG-Mapper	EggNOG-Mapper	EggNOG-Mapper
GCA_000326205.1	PGAP	Bakta	Bakta	Bakta/PGAP/Prokka	Bakta	Bakta/PGAP/Prokka	PGAP	Bakta	Bakta	Prokka	Prokka	Prokka	Bakta	EggNOG-Mapper	EggNOG-Mapper	EggNOG-Mapper
GCA_000326225.1	PGAP	Bakta	Bakta	Bakta/PGAP/Prokka	Bakta/PGAP/Prokka	Bakta/PGAP/Prokka	PGAP	Bakta	Bakta	Prokka	Prokka	Prokka	Bakta	EggNOG-Mapper	EggNOG-Mapper	EggNOG-Mapper
GCA_000326245.1	PGAP	Bakta	Bakta	Bakta/PGAP/Prokka	Bakta	Bakta/PGAP/Prokka	PGAP	Bakta	Bakta	Prokka	Prokka	Prokka	Bakta	EggNOG-Mapper	EggNOG-Mapper	EggNOG-Mapper
GCA_000326265.1	PGAP	Bakta	Bakta	Bakta/PGAP/Prokka	Bakta	Bakta/PGAP/Prokka	PGAP	Bakta	Bakta	Prokka	Prokka	Prokka	Bakta	EggNOG-Mapper	EggNOG-Mapper	EggNOG-Mapper
GCA_000326285.1	PGAP	Bakta	Bakta	Bakta/PGAP/Prokka	Bakta	Bakta/PGAP/Prokka	PGAP	Bakta	Bakta	Prokka	Prokka	Prokka	Bakta	EggNOG-Mapper	EggNOG-Mapper	EggNOG-Mapper
GCA_000326305.1	PGAP	Bakta	Bakta	Bakta/PGAP/Prokka	Bakta	Bakta/PGAP/Prokka	PGAP	Bakta	Bakta	Prokka	Prokka	Prokka	Bakta	EggNOG-Mapper	EggNOG-Mapper	EggNOG-Mapper
GCA_000326325.1	PGAP	Bakta	Bakta	PGAP	Bakta	Bakta/PGAP/Prokka	PGAP	Bakta	Bakta	Prokka	Prokka	Prokka	Bakta	EggNOG-Mapper	EggNOG-Mapper	EggNOG-Mapper
GCA_000326345.1	PGAP	Bakta	Bakta	Bakta/PGAP/Prokka	Bakta	Bakta/PGAP/Prokka	PGAP	Bakta	Bakta	Prokka	Prokka	Prokka	Bakta	EggNOG-Mapper	EggNOG-Mapper	EggNOG-Mapper
GCA_000326365.1	PGAP	Bakta	Bakta	Bakta/PGAP/Prokka	Bakta	Bakta/PGAP/Prokka	PGAP	Bakta	Bakta	Prokka	Prokka	Prokka	Bakta	EggNOG-Mapper	EggNOG-Mapper	EggNOG-Mapper
GCA_000326385.1	PGAP	Bakta	Bakta	PGAP	Bakta/PGAP/Prokka	Bakta/PGAP/Prokka	PGAP	Bakta	Bakta	PGAP	Prokka	Prokka	Bakta	EggNOG-Mapper	EggNOG-Mapper	EggNOG-Mapper
GCA_000326405.1	PGAP	Bakta	Bakta	Bakta/PGAP/Prokka	Bakta	Bakta/PGAP/Prokka	PGAP	Bakta	Bakta	Prokka	Prokka	Prokka	Bakta	EggNOG-Mapper	EggNOG-Mapper	EggNOG-Mapper
GCA_000326425.1	PGAP	Bakta	Bakta	Bakta/PGAP/Prokka	Bakta	Bakta/PGAP/Prokka	PGAP	Bakta	Bakta	Prokka	Prokka	Prokka	Bakta	EggNOG-Mapper	EggNOG-Mapper	EggNOG-Mapper
GCA_000326445.1	PGAP	Bakta	Bakta	Bakta/PGAP/Prokka	Bakta	Bakta/PGAP/Prokka	PGAP	Bakta	Bakta	Prokka	Prokka	Prokka	Bakta	EggNOG-Mapper	EggNOG-Mapper	EggNOG-Mapper
GCA_000326465.1	PGAP	Bakta	Bakta	Bakta/PGAP/Prokka	Bakta	Bakta/PGAP/Prokka	PGAP	Bakta	Bakta	Prokka	Prokka	Prokka	Bakta	EggNOG-Mapper	EggNOG-Mapper	EggNOG-Mapper
GCA_000326485.1	PGAP	Bakta	Bakta	Bakta/PGAP/Prokka	Bakta/PGAP/Prokka	Bakta/PGAP/Prokka	PGAP	Bakta	Bakta	Prokka	Prokka	Prokka	Bakta	EggNOG-Mapper	EggNOG-Mapper	EggNOG-Mapper
GCA_000326505.1	PGAP	Bakta	Bakta	Bakta/PGAP/Prokka	Bakta	Bakta/PGAP/Prokka	PGAP	Bakta	Bakta	Prokka	Prokka	Prokka	Bakta	EggNOG-Mapper	EggNOG-Mapper	EggNOG-Mapper
GCA_000326525.1	PGAP	Bakta	Bakta	Bakta/PGAP/Prokka	Bakta/PGAP/Prokka	Bakta/PGAP/Prokka	PGAP	Bakta	Bakta	Prokka	Prokka	Prokka	Bakta	EggNOG-Mapper	EggNOG-Mapper	EggNOG-Mapper
GCA_000326545.1	PGAP	Bakta	Bakta	Bakta/PGAP/Prokka	Bakta	Bakta/PGAP/Prokka	PGAP	Bakta	Bakta	Prokka	Prokka	Prokka	Bakta	EggNOG-Mapper	EggNOG-Mapper	EggNOG-Mapper
GCA_000326565.1	PGAP	Bakta	Bakta	Bakta/PGAP/Prokka	Bakta	Bakta/PGAP/Prokka	PGAP	Bakta	Bakta	Prokka	Prokka	Prokka	Bakta	EggNOG-Mapper	EggNOG-Mapper	EggNOG-Mapper
GCA_000326585.1	PGAP	Bakta	Bakta	PGAP	Bakta/PGAP/Prokka	Bakta/PGAP/Prokka	PGAP	Bakta	Bakta	Prokka	Prokka	Prokka	Bakta	EggNOG-Mapper	EggNOG-Mapper	EggNOG-Mapper
GCA_000326605.1	PGAP	Bakta	Bakta	Bakta/PGAP/Prokka	Bakta/PGAP/Prokka	Bakta/PGAP/Prokka	PGAP	Bakta	Bakta	Prokka	Prokka	Prokka	Bakta	EggNOG-Mapper	EggNOG-Mapper	EggNOG-Mapper
GCA_000326625.1	PGAP	Bakta	Bakta	Bakta/PGAP/Prokka	Bakta	Bakta/PGAP/Prokka	PGAP	Bakta	Bakta	Prokka	Prokka	Prokka	Bakta	EggNOG-Mapper	EggNOG-Mapper	EggNOG-Mapper
GCA_000326645.1	PGAP	Bakta	Bakta	Bakta/PGAP/Prokka	Bakta	Bakta/PGAP/Prokka	PGAP	Bakta	Bakta	Prokka	Prokka	Prokka	Bakta	EggNOG-Mapper	EggNOG-Mapper	EggNOG-Mapper
GCA_000326665.1	PGAP	Bakta	Bakta	Bakta/PGAP/Prokka	Bakta	Bakta/PGAP/Prokka	PGAP	Bakta	Bakta	Prokka	Prokka	Prokka	Bakta	EggNOG-Mapper	EggNOG-Mapper	EggNOG-Mapper
GCA_000326685.1	PGAP	Bakta	Bakta	Bakta/PGAP/Prokka	Bakta	Bakta/PGAP/Prokka	PGAP	Bakta	Bakta	Prokka	Prokka	Prokka	Bakta	EggNOG-Mapper	EggNOG-Mapper	EggNOG-Mapper
GCA_000326705.1	PGAP	Bakta	Bakta	Bakta/PGAP/Prokka	Bakta	Bakta/PGAP/Prokka	PGAP	Bakta	Bakta	Prokka	Prokka	Prokka	Bakta	EggNOG-Mapper	EggNOG-Mapper	EggNOG-Mapper
GCA_000326725.1	PGAP	Bakta	Bakta	Bakta/PGAP/Prokka	Bakta	Bakta/PGAP/Prokka	PGAP	Bakta	Bakta	Prokka	Prokka	Prokka	Bakta	EggNOG-Mapper	EggNOG-Mapper	EggNOG-Mapper
GCA_000326745.1	PGAP	Bakta	Bakta	Bakta/PGAP/Prokka	Bakta	Bakta/PGAP/Prokka	PGAP	Bakta	Bakta	Prokka	Prokka	Prokka	Bakta	EggNOG-Mapper	EggNOG-Mapper	EggNOG-Mapper
GCA_000326765.1	PGAP	Bakta	Bakta	Bakta/PGAP/Prokka	Bakta	Bakta/PGAP/Prokka	PGAP	Bakta	Bakta	Prokka	Prokka	Prokka	Bakta	EggNOG-Mapper	EggNOG-Mapper	EggNOG-Mapper
GCA_000326785.1	PGAP	Bakta	Bakta	Bakta/PGAP/Prokka	Bakta	Bakta/PGAP/Prokka	PGAP	Bakta	Bakta	Prokka	Prokka	Prokka	Bakta	EggNOG-Mapper	EggNOG-Mapper	EggNOG-Mapper
GCA_000326805.1	PGAP	Bakta	Bakta	Bakta/PGAP/Prokka	Bakta	Bakta/PGAP/Prokka	PGAP	Bakta	Bakta	Prokka	Prokka	Prokka	Bakta	EggNOG-Mapper	EggNOG-Mapper	EggNOG-Mapper
GCA_000326825.1	PGAP	Bakta	Bakta	Bakta/PGAP/Prokka	Bakta	Bakta/PGAP/Prokka	PGAP	Bakta	Bakta	Prokka	Prokka	Prokka	Bakta	EggNOG-Mapper	EggNOG-Mapper	EggNOG-Mapper
GCA_000326845.1	PGAP	Bakta	Bakta	Bakta/PGAP/Prokka	Bakta	Bakta/PGAP/Prokka	PGAP	Bakta	Bakta	Prokka	Prokka	Prokka	Bakta	EggNOG-Mapper	EggNOG-Mapper	EggNOG-Mapper
GCA_000326885.1	PGAP	Bakta	Bakta	Bakta/PGAP/Prokka	Bakta	Bakta/PGAP/Prokka	PGAP	Bakta	Bakta	Prokka	Prokka	Prokka	Bakta	EggNOG-Mapper	EggNOG-Mapper	EggNOG-Mapper
GCA_000326905.1	PGAP	Bakta	Bakta	Bakta/PGAP/Prokka	Bakta	Bakta/PGAP/Prokka	PGAP	Bakta	Bakta	Prokka	Prokka	Prokka	Bakta	EggNOG-Mapper	EggNOG-Mapper	EggNOG-Mapper
GCA_000326925.1	PGAP	Bakta	Bakta	Bakta/PGAP/Prokka	Bakta/PGAP/Prokka	Bakta/PGAP/Prokka	PGAP	Bakta	Bakta	Prokka	Prokka	Prokka	Bakta	Bakta	EggNOG-Mapper	EggNOG-Mapper
GCA_000326945.1	PGAP	Bakta	Bakta	Bakta/PGAP/Prokka	Bakta	Bakta/PGAP/Prokka	PGAP	Bakta	Bakta	Prokka	Prokka	Prokka	Bakta	EggNOG-Mapper	EggNOG-Mapper	EggNOG-Mapper
GCA_000326965.1	PGAP	Bakta	Bakta	Bakta/PGAP/Prokka	Bakta	Bakta/PGAP/Prokka	PGAP	Bakta	Bakta	Prokka	Prokka	Prokka	Bakta	EggNOG-Mapper	EggNOG-Mapper	EggNOG-Mapper
GCA_000331615.1	PGAP	Bakta	Bakta	Bakta/Prokka	Bakta	Bakta/PGAP/Prokka	PGAP	Bakta	Bakta	EggNOG-Mapper	Prokka	EggNOG-Mapper	Bakta	EggNOG-Mapper	EggNOG-Mapper	EggNOG-Mapper
GCA_000332755.1	PGAP	Bakta	Bakta	Bakta/PGAP/Prokka	Bakta	Bakta/PGAP/Prokka	PGAP	Bakta	Bakta	Prokka	Prokka	Prokka	Bakta	EggNOG-Mapper	EggNOG-Mapper	EggNOG-Mapper
GCA_000333175.1	PGAP	Bakta	Bakta	PGAP	Bakta/PGAP/Prokka	Bakta/PGAP/Prokka	PGAP	Bakta	Bakta	Prokka	Prokka	EggNOG-Mapper	Bakta	Bakta	EggNOG-Mapper	EggNOG-Mapper
GCA_000333195.1	PGAP	Bakta	Bakta	PGAP	Bakta/PGAP/Prokka	Bakta/PGAP/Prokka	PGAP	Bakta	Bakta	Prokka	Prokka	EggNOG-Mapper	Bakta	EggNOG-Mapper	EggNOG-Mapper	EggNOG-Mapper
GCA_000333215.1	PGAP	Bakta	Bakta	PGAP	Bakta	Bakta/PGAP/Prokka	PGAP	Bakta	Bakta	Prokka	Prokka	EggNOG-Mapper	EggNOG-Mapper	EggNOG-Mapper	EggNOG-Mapper	EggNOG-Mapper
GCA_000334975.2	PGAP	Bakta	Bakta	PGAP	Bakta	Bakta/PGAP/Prokka	PGAP	PGAP	Bakta	Prokka	Prokka	Prokka	Bakta	Bakta	EggNOG-Mapper	EggNOG-Mapper
GCA_000334995.2	PGAP	Bakta	Bakta	Bakta/PGAP/Prokka	Bakta	Bakta/PGAP/Prokka	PGAP	Bakta	Bakta	Prokka	Prokka	Prokka	Bakta	EggNOG-Mapper	EggNOG-Mapper	EggNOG-Mapper
GCA_000335015.2	PGAP	Bakta	Bakta	Bakta/PGAP/Prokka	Bakta	Bakta/PGAP/Prokka	PGAP	Bakta	Bakta	Prokka	Prokka	Prokka	Bakta	EggNOG-Mapper	EggNOG-Mapper	EggNOG-Mapper
GCA_000335035.2	PGAP	Bakta	Bakta	Bakta/PGAP/Prokka	Bakta	Bakta/PGAP/Prokka	PGAP	PGAP	Bakta	Prokka	Prokka	Prokka	Bakta	EggNOG-Mapper	EggNOG-Mapper	EggNOG-Mapper
GCA_000335055.2	PGAP	Bakta	Bakta	Bakta/PGAP/Prokka	Bakta	Bakta/PGAP/Prokka	PGAP	Bakta	Bakta	Prokka	Prokka	Prokka	Bakta	EggNOG-Mapper	EggNOG-Mapper	EggNOG-Mapper
GCA_000335075.2	PGAP	Bakta	Bakta	PGAP	Bakta	Bakta/PGAP/Prokka	PGAP	Bakta	Bakta	Prokka	Prokka	Prokka	Bakta	EggNOG-Mapper	EggNOG-Mapper	EggNOG-Mapper
GCA_000335095.2	PGAP	Bakta	Bakta	Bakta/PGAP/Prokka	Bakta	Bakta/PGAP/Prokka	PGAP	Bakta	Bakta	Prokka	Prokka	Prokka	Bakta	EggNOG-Mapper	EggNOG-Mapper	EggNOG-Mapper
GCA_000335115.1	PGAP	Bakta	Bakta	Bakta/PGAP/Prokka	Bakta	Bakta/PGAP/Prokka	PGAP	Bakta	Bakta	Prokka	Prokka	Prokka	Bakta	EggNOG-Mapper	EggNOG-Mapper	EggNOG-Mapper
GCA_000335135.1	PGAP	Bakta	Bakta	Prokka	Bakta	Bakta/PGAP/Prokka	PGAP	Bakta	Bakta	Prokka	Prokka	Prokka	Bakta	EggNOG-Mapper	EggNOG-Mapper	EggNOG-Mapper
GCA_000335155.2	PGAP	Bakta	Bakta	Prokka	Bakta	Bakta/PGAP/Prokka	PGAP	Bakta	Bakta	Prokka	Prokka	Prokka	Bakta	EggNOG-Mapper	EggNOG-Mapper	EggNOG-Mapper
GCA_000335175.2	PGAP	Bakta	Bakta	Bakta/PGAP/Prokka	Bakta	Bakta/PGAP/Prokka	PGAP	Bakta	Bakta	Prokka	Prokka	Prokka	Bakta	EggNOG-Mapper	EggNOG-Mapper	EggNOG-Mapper
GCA_000335195.2	PGAP	Bakta	Bakta	PGAP	Bakta	Bakta/PGAP/Prokka	PGAP	Bakta	Bakta	Prokka	Prokka	Prokka	Bakta	EggNOG-Mapper	EggNOG-Mapper	EggNOG-Mapper
GCA_000335215.2	PGAP	Bakta	Bakta	PGAP	Bakta	Bakta/PGAP/Prokka	PGAP	Bakta	Bakta	Prokka	Prokka	Prokka	Bakta	EggNOG-Mapper	EggNOG-Mapper	EggNOG-Mapper
GCA_000335235.2	PGAP	Bakta	Bakta	Bakta/PGAP/Prokka	Bakta	Bakta/PGAP/Prokka	PGAP	Bakta	Bakta	Prokka	Prokka	Prokka	Bakta	EggNOG-Mapper	EggNOG-Mapper	EggNOG-Mapper
GCA_000335255.2	PGAP	Bakta	Bakta	Bakta/PGAP/Prokka	Bakta	Bakta/PGAP/Prokka	PGAP	Bakta	Bakta	Prokka	Prokka	Prokka	Bakta	EggNOG-Mapper	EggNOG-Mapper	EggNOG-Mapper
GCA_000335275.2	PGAP	Bakta	Bakta	Bakta/PGAP/Prokka	Bakta	Bakta/PGAP/Prokka	PGAP	Bakta	Bakta	Prokka	Prokka	Prokka	Bakta	EggNOG-Mapper	EggNOG-Mapper	EggNOG-Mapper
GCA_000335295.2	PGAP	Bakta	Bakta	Bakta/PGAP/Prokka	Bakta	Bakta/PGAP/Prokka	PGAP	Bakta	Bakta	Prokka	Prokka	Prokka	Bakta	EggNOG-Mapper	EggNOG-Mapper	EggNOG-Mapper
GCA_000335315.2	PGAP	Bakta	Bakta	Bakta/PGAP/Prokka	Bakta	Bakta/PGAP/Prokka	PGAP	PGAP	Bakta	Prokka	Prokka	Prokka	Bakta	EggNOG-Mapper	EggNOG-Mapper	EggNOG-Mapper
GCA_000335335.2	PGAP	Bakta	Bakta	PGAP	Bakta	Bakta/PGAP/Prokka	PGAP	Bakta	Bakta	Prokka	Prokka	Prokka	Bakta	EggNOG-Mapper	EggNOG-Mapper	EggNOG-Mapper
GCA_000335355.2	PGAP	Bakta	Bakta	PGAP	Bakta	Bakta/PGAP/Prokka	PGAP	Bakta	Bakta	Prokka	Prokka	Prokka	Bakta	EggNOG-Mapper	EggNOG-Mapper	EggNOG-Mapper
GCA_000335375.2	PGAP	Bakta	Bakta	Bakta/PGAP/Prokka	Bakta	Bakta/PGAP/Prokka	PGAP	Bakta	Bakta	Prokka	Prokka	Prokka	Bakta	EggNOG-Mapper	EggNOG-Mapper	EggNOG-Mapper
GCA_000335415.2	PGAP	Bakta	Bakta	Bakta/PGAP/Prokka	Bakta	Bakta/PGAP/Prokka	PGAP	Bakta	Bakta	Prokka	Prokka	Prokka	Bakta	EggNOG-Mapper	EggNOG-Mapper	EggNOG-Mapper
GCA_000335435.2	PGAP	Bakta	Bakta	Bakta/PGAP/Prokka	Bakta	Bakta/PGAP/Prokka	PGAP	Bakta	Bakta	Prokka	Prokka	Prokka	Bakta	EggNOG-Mapper	EggNOG-Mapper	EggNOG-Mapper
GCA_000335455.2	PGAP	Bakta	Bakta	PGAP	Bakta	Bakta/PGAP/Prokka	PGAP	Bakta	Bakta	Prokka	Prokka	Prokka	Bakta	EggNOG-Mapper	EggNOG-Mapper	EggNOG-Mapper
GCA_000340235.1	PGAP	Bakta	Bakta	PGAP	Bakta	Bakta/PGAP/Prokka	PGAP	Bakta	Bakta	Prokka	Prokka	Prokka	Bakta	EggNOG-Mapper	EggNOG-Mapper	EggNOG-Mapper
GCA_000340255.1	PGAP	Bakta	Bakta	PGAP	Bakta	Bakta/PGAP/Prokka	PGAP	PGAP	Bakta	Prokka	Prokka	Prokka	Bakta	EggNOG-Mapper	EggNOG-Mapper	EggNOG-Mapper
GCA_000340275.1	PGAP	Bakta	Bakta	PGAP	Bakta/PGAP/Prokka	Bakta/PGAP/Prokka	PGAP	Bakta	Bakta	Prokka	Prokka	Prokka	Bakta	EggNOG-Mapper	EggNOG-Mapper	EggNOG-Mapper
GCA_000340455.2	PGAP	Bakta	Bakta	PGAP	Bakta	Bakta/PGAP/Prokka	PGAP	PGAP	Bakta	Prokka	Prokka	Prokka	Bakta	Bakta	EggNOG-Mapper	EggNOG-Mapper
GCA_000350005.1	PGAP	Bakta	Bakta	PGAP	Bakta	Bakta/PGAP/Prokka	PGAP	Bakta	Bakta	Prokka	Prokka	Prokka	Bakta	EggNOG-Mapper	EggNOG-Mapper	EggNOG-Mapper
GCA_000350025.2	PGAP	Bakta	Bakta	PGAP	Bakta	Bakta/PGAP/Prokka	PGAP	Bakta	Bakta	Prokka	Prokka	Prokka	Bakta	EggNOG-Mapper	EggNOG-Mapper	EggNOG-Mapper
GCA_000350045.2	PGAP	Bakta	Bakta	PGAP	Bakta	Bakta/PGAP/Prokka	PGAP	Bakta	Bakta	Prokka	Prokka	Prokka	Bakta	Bakta	EggNOG-Mapper	EggNOG-Mapper
GCA_000350185.1	Bakta	Bakta	Bakta	Bakta/PGAP/Prokka	Bakta/PGAP/Prokka	Bakta/PGAP/Prokka	PGAP	Bakta	Bakta	Prokka	Prokka	Prokka	Bakta	EggNOG-Mapper	EggNOG-Mapper	EggNOG-Mapper
GCA_000350185.1	Bakta	Bakta	Bakta	Bakta/PGAP/Prokka	Bakta/PGAP/Prokka	Bakta/PGAP/Prokka	PGAP	Bakta	Bakta	Prokka	Prokka	Prokka	Bakta	EggNOG-Mapper	EggNOG-Mapper	EggNOG-Mapper
GCA_000350625.1	Bakta	Bakta	Bakta	PGAP	Bakta	Bakta/PGAP/Prokka	PGAP	Bakta	Bakta	EggNOG-Mapper	Prokka	Prokka	Bakta	EggNOG-Mapper	EggNOG-Mapper	EggNOG-Mapper
GCA_000350645.1	PGAP	Bakta	Bakta	Prokka	Bakta/PGAP/Prokka	Bakta/PGAP/Prokka	PGAP	Bakta	Bakta	EggNOG-Mapper	Prokka	Prokka	Bakta	EggNOG-Mapper	EggNOG-Mapper	EggNOG-Mapper
GCA_000350665.1	PGAP	Bakta	Bakta	Prokka	Bakta	Bakta/PGAP/Prokka	PGAP	Bakta	Bakta	EggNOG-Mapper	Prokka	Prokka	Bakta	EggNOG-Mapper	EggNOG-Mapper	EggNOG-Mapper
GCA_000350685.1	PGAP	Bakta	Bakta	Prokka	Bakta/PGAP/Prokka	Bakta/PGAP/Prokka	PGAP	Bakta	Bakta	EggNOG-Mapper	Prokka	Prokka	Bakta	EggNOG-Mapper	EggNOG-Mapper	EggNOG-Mapper
GCA_000350725.1	PGAP	Bakta	Bakta	Bakta/PGAP/Prokka	Bakta	Bakta/PGAP/Prokka	PGAP	Bakta	Bakta	EggNOG-Mapper	Prokka	Prokka	Bakta	EggNOG-Mapper	EggNOG-Mapper	EggNOG-Mapper
GCA_000350745.1	PGAP	Bakta	Bakta	PGAP	Bakta	Bakta/PGAP/Prokka	PGAP	Bakta	Bakta	EggNOG-Mapper	Prokka	Prokka	Bakta	EggNOG-Mapper	EggNOG-Mapper	EggNOG-Mapper
GCA_000350765.1	PGAP	Bakta	Bakta	Bakta/PGAP/Prokka	Bakta/PGAP/Prokka	Bakta/PGAP/Prokka	PGAP	Bakta	Bakta	EggNOG-Mapper	Prokka	Prokka	Bakta	EggNOG-Mapper	EggNOG-Mapper	EggNOG-Mapper
GCA_000350785.1	PGAP	Bakta	Bakta	PGAP	Bakta	Bakta/PGAP/Prokka	PGAP	Bakta	Bakta	EggNOG-Mapper	Prokka	Prokka	Bakta	EggNOG-Mapper	EggNOG-Mapper	EggNOG-Mapper
GCA_000350805.1	PGAP	Bakta	Bakta	PGAP/Prokka	Bakta	Bakta/PGAP/Prokka	PGAP	Bakta	Bakta	EggNOG-Mapper	Prokka	Prokka	Bakta	EggNOG-Mapper	EggNOG-Mapper	EggNOG-Mapper
GCA_000350825.1	PGAP	Bakta	Bakta	Prokka	Bakta	Bakta/PGAP/Prokka	PGAP	Bakta	Bakta	EggNOG-Mapper	Prokka	Prokka	Bakta	EggNOG-Mapper	EggNOG-Mapper	EggNOG-Mapper
GCA_000350845.1	PGAP	Bakta	Bakta	PGAP/Prokka	Bakta/PGAP/Prokka	Bakta/PGAP/Prokka	PGAP	Bakta	Bakta	EggNOG-Mapper	Prokka	Prokka	Bakta	EggNOG-Mapper	EggNOG-Mapper	EggNOG-Mapper
GCA_000350865.1	PGAP	Bakta	Bakta	Prokka	Bakta	Bakta/PGAP/Prokka	PGAP	Bakta	Bakta	EggNOG-Mapper	Prokka	Prokka	Bakta	EggNOG-Mapper	EggNOG-Mapper	EggNOG-Mapper
GCA_000350885.1	PGAP	Bakta	Bakta	PGAP	Bakta/PGAP/Prokka	Bakta/PGAP/Prokka	PGAP	Bakta	Bakta	EggNOG-Mapper	Prokka	Prokka	Bakta	EggNOG-Mapper	EggNOG-Mapper	EggNOG-Mapper
GCA_000350905.1	PGAP	Bakta	Bakta	Prokka	Bakta	Bakta/PGAP/Prokka	PGAP	Bakta	Bakta	EggNOG-Mapper	Prokka	Prokka	Bakta	EggNOG-Mapper	EggNOG-Mapper	EggNOG-Mapper
GCA_000350925.1	PGAP	Bakta	Bakta	Bakta/PGAP/Prokka	Bakta	Bakta/PGAP/Prokka	PGAP	Bakta	Bakta	EggNOG-Mapper	Prokka	Prokka	Bakta	EggNOG-Mapper	EggNOG-Mapper	EggNOG-Mapper
GCA_000350945.1	PGAP	Bakta	Bakta	Prokka	Bakta/PGAP/Prokka	Bakta/PGAP/Prokka	PGAP	Bakta	Bakta	EggNOG-Mapper	Prokka	Prokka	Bakta	EggNOG-Mapper	EggNOG-Mapper	EggNOG-Mapper
GCA_000350965.1	PGAP	Bakta	Bakta	Prokka	Bakta	Bakta/PGAP/Prokka	PGAP	Bakta	Bakta	EggNOG-Mapper	Prokka	Prokka	Bakta	EggNOG-Mapper	EggNOG-Mapper	EggNOG-Mapper
GCA_000350985.1	PGAP	Bakta	Bakta	PGAP	Bakta	Bakta/PGAP/Prokka	PGAP	Bakta	Bakta	EggNOG-Mapper	Prokka	Prokka	Bakta	EggNOG-Mapper	EggNOG-Mapper	EggNOG-Mapper
GCA_000351005.1	PGAP	Bakta	Bakta	Prokka	Bakta	Bakta/PGAP/Prokka	PGAP	Bakta	Bakta	PGAP	Prokka	Prokka	Bakta	EggNOG-Mapper	EggNOG-Mapper	EggNOG-Mapper
GCA_000351025.1	PGAP	Bakta	Bakta	Bakta/PGAP/Prokka	Bakta	Bakta/PGAP/Prokka	PGAP	Bakta	Bakta	EggNOG-Mapper	Prokka	Prokka	Bakta	EggNOG-Mapper	EggNOG-Mapper	EggNOG-Mapper
GCA_000351045.1	PGAP	Bakta	Bakta	Bakta/Prokka	Bakta	Bakta/PGAP/Prokka	PGAP	Bakta	Bakta	PGAP	Prokka	Prokka	Bakta	EggNOG-Mapper	EggNOG-Mapper	EggNOG-Mapper
GCA_000351065.1	PGAP	Bakta	Bakta	Prokka	Bakta	Bakta/PGAP/Prokka	PGAP	Bakta	Bakta	EggNOG-Mapper	Prokka	Prokka	Bakta	EggNOG-Mapper	EggNOG-Mapper	EggNOG-Mapper
GCA_000351085.1	PGAP	Bakta	Bakta	PGAP/Prokka	Bakta/PGAP/Prokka	Bakta/PGAP/Prokka	PGAP	Bakta	Bakta	EggNOG-Mapper	Prokka	Prokka	Bakta	EggNOG-Mapper	EggNOG-Mapper	EggNOG-Mapper
GCA_000351105.1	PGAP	Bakta	Bakta	Prokka	Bakta/PGAP/Prokka	Bakta/PGAP/Prokka	PGAP	Bakta	Bakta	EggNOG-Mapper	Prokka	Prokka	Bakta	EggNOG-Mapper	EggNOG-Mapper	EggNOG-Mapper
GCA_000351125.1	PGAP	Bakta	Bakta	Prokka	Bakta	Bakta/PGAP/Prokka	PGAP	Bakta	Bakta	EggNOG-Mapper	Prokka	Prokka	Bakta	EggNOG-Mapper	EggNOG-Mapper	EggNOG-Mapper
GCA_000351145.1	Bakta	Bakta	Bakta	PGAP/Prokka	Bakta	Bakta/PGAP/Prokka	PGAP	Bakta	Bakta	EggNOG-Mapper	Prokka	Prokka	Bakta	EggNOG-Mapper	EggNOG-Mapper	EggNOG-Mapper
GCA_000351165.1	PGAP	Bakta	Bakta	Bakta/Prokka	Bakta	Bakta/PGAP/Prokka	PGAP	Bakta	Bakta	EggNOG-Mapper	Prokka	Prokka	Bakta	EggNOG-Mapper	EggNOG-Mapper	EggNOG-Mapper
GCA_000351185.1	PGAP	Bakta	Bakta	Bakta/Prokka	Bakta	Bakta/PGAP/Prokka	PGAP	Bakta	Bakta	EggNOG-Mapper	Prokka	Prokka	Bakta	EggNOG-Mapper	EggNOG-Mapper	EggNOG-Mapper
GCA_000351205.1	PGAP	Bakta	Bakta	Prokka	Bakta/PGAP/Prokka	Bakta/PGAP/Prokka	PGAP	Bakta	Bakta	EggNOG-Mapper	Prokka	Prokka	Bakta	EggNOG-Mapper	EggNOG-Mapper	EggNOG-Mapper
GCA_000351225.1	PGAP	Bakta	Bakta	Bakta/Prokka	Bakta	Bakta/PGAP/Prokka	PGAP	Bakta	Bakta	EggNOG-Mapper	Prokka	Prokka	Bakta	EggNOG-Mapper	EggNOG-Mapper	EggNOG-Mapper
GCA_000351245.1	PGAP	Bakta	Bakta	PGAP	Bakta/PGAP/Prokka	Bakta/PGAP/Prokka	PGAP	Bakta	Bakta	EggNOG-Mapper	Prokka	Prokka	Bakta	EggNOG-Mapper	EggNOG-Mapper	EggNOG-Mapper
GCA_000351265.1	PGAP	Bakta	Bakta	Bakta/Prokka	Bakta	Bakta/PGAP/Prokka	PGAP	Bakta	Bakta	EggNOG-Mapper	Prokka	Prokka	Bakta	EggNOG-Mapper	EggNOG-Mapper	EggNOG-Mapper
GCA_000351285.1	PGAP	Bakta	Bakta	Prokka	Bakta	Bakta/PGAP/Prokka	PGAP	Bakta	Bakta	EggNOG-Mapper	Prokka	Prokka	Bakta	EggNOG-Mapper	EggNOG-Mapper	EggNOG-Mapper
GCA_000351305.1	PGAP	Bakta	Bakta	Prokka	Bakta	Bakta/PGAP/Prokka	PGAP	Bakta	Bakta	EggNOG-Mapper	Prokka	Prokka	Bakta	EggNOG-Mapper	EggNOG-Mapper	EggNOG-Mapper
GCA_000351325.1	PGAP	Bakta	Bakta	Bakta/Prokka	Bakta/PGAP/Prokka	Bakta/PGAP/Prokka	PGAP	Bakta	Bakta	EggNOG-Mapper	Prokka	Prokka	Bakta	EggNOG-Mapper	EggNOG-Mapper	EggNOG-Mapper
GCA_000351345.1	PGAP	Bakta	Bakta	Prokka	Bakta/PGAP/Prokka	Bakta/PGAP/Prokka	PGAP	Bakta	Bakta	EggNOG-Mapper	Prokka	EggNOG-Mapper	Bakta	EggNOG-Mapper	EggNOG-Mapper	EggNOG-Mapper
GCA_000351365.1	PGAP	Bakta	Bakta	Prokka	Bakta	Bakta/PGAP/Prokka	PGAP	Bakta	Bakta	EggNOG-Mapper	Prokka	Prokka	Bakta	EggNOG-Mapper	EggNOG-Mapper	EggNOG-Mapper
GCA_000351385.1	PGAP	Bakta	Bakta	PGAP	Bakta/PGAP/Prokka	Bakta/PGAP/Prokka	PGAP	Bakta	Bakta	EggNOG-Mapper	Prokka	Prokka	Bakta	EggNOG-Mapper	EggNOG-Mapper	EggNOG-Mapper
GCA_000351405.1	PGAP	Bakta	Bakta	Prokka	Bakta/PGAP/Prokka	Bakta/PGAP/Prokka	Bakta	Bakta	Bakta	EggNOG-Mapper	Prokka	EggNOG-Mapper	Bakta	EggNOG-Mapper	EggNOG-Mapper	EggNOG-Mapper
GCA_000351425.1	PGAP	Bakta	Bakta	Prokka	Bakta	Bakta/PGAP/Prokka	PGAP	Bakta	Bakta	PGAP	Prokka	Prokka	EggNOG-Mapper	EggNOG-Mapper	EggNOG-Mapper	EggNOG-Mapper
GCA_000351445.1	PGAP	Bakta	Bakta	Prokka	Bakta	Bakta/PGAP/Prokka	PGAP	Bakta	Bakta	EggNOG-Mapper	Prokka	Prokka	Bakta	EggNOG-Mapper	EggNOG-Mapper	EggNOG-Mapper
GCA_000351465.1	PGAP	Bakta	Bakta	PGAP	Bakta	Bakta/PGAP/Prokka	PGAP	Bakta	Bakta	EggNOG-Mapper	Prokka	Prokka	Bakta	EggNOG-Mapper	EggNOG-Mapper	EggNOG-Mapper
GCA_000351485.1	PGAP	Bakta	Bakta	PGAP	Bakta	Bakta/PGAP/Prokka	PGAP	Bakta	Bakta	EggNOG-Mapper	Prokka	Prokka	Bakta	EggNOG-Mapper	EggNOG-Mapper	EggNOG-Mapper
GCA_000351505.1	PGAP	Bakta	Bakta	PGAP/Prokka	Bakta/PGAP/Prokka	Bakta/PGAP/Prokka	PGAP	Bakta	Bakta	EggNOG-Mapper	Prokka	Prokka	Bakta	EggNOG-Mapper	EggNOG-Mapper	EggNOG-Mapper
GCA_000351525.1	PGAP	Bakta	Bakta	Prokka	Bakta	Bakta/PGAP/Prokka	PGAP	Bakta	Bakta	EggNOG-Mapper	Prokka	Prokka	Bakta	EggNOG-Mapper	EggNOG-Mapper	EggNOG-Mapper
GCA_000351545.1	PGAP	Bakta	Bakta	PGAP/Prokka	Bakta/PGAP/Prokka	Bakta/PGAP/Prokka	PGAP	Bakta	Bakta	EggNOG-Mapper	Prokka	Prokka	Bakta	EggNOG-Mapper	EggNOG-Mapper	EggNOG-Mapper
GCA_000351565.1	PGAP	Bakta	Bakta	Prokka	Bakta/PGAP/Prokka	Bakta/PGAP/Prokka	PGAP	Bakta	Bakta	EggNOG-Mapper	Prokka	Prokka	Bakta	EggNOG-Mapper	EggNOG-Mapper	EggNOG-Mapper
GCA_000351585.1	PGAP	Bakta	Bakta	Bakta/PGAP/Prokka	Bakta	Bakta/PGAP/Prokka	PGAP	Bakta	Bakta	EggNOG-Mapper	Prokka	Prokka	Bakta	EggNOG-Mapper	EggNOG-Mapper	EggNOG-Mapper
GCA_000351605.1	PGAP	Bakta	Bakta	Prokka	Bakta	Bakta/PGAP/Prokka	PGAP	Bakta	Bakta	EggNOG-Mapper	Prokka	Prokka	Bakta	EggNOG-Mapper	EggNOG-Mapper	EggNOG-Mapper
GCA_000351625.1	PGAP	Bakta	Bakta	Prokka	Bakta	Bakta/PGAP/Prokka	PGAP	Bakta	Bakta	EggNOG-Mapper	Prokka	Prokka	Bakta	EggNOG-Mapper	EggNOG-Mapper	EggNOG-Mapper
GCA_000351645.1	PGAP	Bakta	Bakta	Prokka	Bakta	Bakta/PGAP/Prokka	PGAP	Bakta	Bakta	EggNOG-Mapper	Prokka	Prokka	Bakta	EggNOG-Mapper	EggNOG-Mapper	EggNOG-Mapper
GCA_000351665.1	PGAP	Bakta	Bakta	Bakta/Prokka	Bakta/PGAP/Prokka	Bakta/PGAP/Prokka	PGAP	Bakta	Bakta	EggNOG-Mapper	Prokka	Prokka	Bakta	EggNOG-Mapper	EggNOG-Mapper	EggNOG-Mapper
GCA_000351685.1	PGAP	Bakta	Bakta	Prokka	Bakta	Bakta/PGAP/Prokka	PGAP	Bakta	Bakta	EggNOG-Mapper	Prokka	Prokka	Bakta	EggNOG-Mapper	EggNOG-Mapper	EggNOG-Mapper
GCA_000351705.1	PGAP	Bakta	Bakta	Prokka	Bakta/PGAP/Prokka	Bakta/PGAP/Prokka	PGAP	Bakta	Bakta	EggNOG-Mapper	Prokka	Prokka	Bakta	EggNOG-Mapper	EggNOG-Mapper	EggNOG-Mapper
GCA_000351725.1	Bakta	Bakta	Bakta	PGAP	Bakta/PGAP/Prokka	Bakta/PGAP/Prokka	PGAP	Bakta	Bakta	EggNOG-Mapper	Prokka	Prokka	Bakta	Bakta	EggNOG-Mapper	EggNOG-Mapper
GCA_000351745.1	PGAP	Bakta	Bakta	PGAP	Bakta	Bakta/PGAP/Prokka	PGAP	Bakta	Bakta	EggNOG-Mapper	Prokka	Prokka	Bakta	EggNOG-Mapper	EggNOG-Mapper	EggNOG-Mapper
GCA_000351765.1	PGAP	Bakta	Bakta	Prokka	Bakta/PGAP/Prokka	Bakta/PGAP/Prokka	PGAP	Bakta	Bakta	EggNOG-Mapper	Prokka	Prokka	Bakta	EggNOG-Mapper	EggNOG-Mapper	EggNOG-Mapper
GCA_000351785.1	PGAP	Bakta	Bakta	PGAP	Bakta	Bakta/PGAP/Prokka	PGAP	Bakta	Bakta	EggNOG-Mapper	Prokka	Prokka	Bakta	EggNOG-Mapper	EggNOG-Mapper	EggNOG-Mapper
GCA_000351805.1	PGAP	Bakta	Bakta	Bakta/Prokka	Bakta	Bakta/PGAP/Prokka	PGAP	Bakta	Bakta	PGAP	Prokka	Prokka	Bakta	EggNOG-Mapper	EggNOG-Mapper	EggNOG-Mapper
GCA_000351825.1	PGAP	Bakta	Bakta	Bakta/PGAP/Prokka	Bakta	Bakta/PGAP/Prokka	PGAP	Bakta	Bakta	EggNOG-Mapper	Prokka	Prokka	Bakta	EggNOG-Mapper	EggNOG-Mapper	EggNOG-Mapper
GCA_000351845.1	PGAP	Bakta	Bakta	PGAP	Bakta	Bakta/PGAP/Prokka	PGAP	Bakta	Bakta	EggNOG-Mapper	Prokka	Prokka	Bakta	EggNOG-Mapper	EggNOG-Mapper	EggNOG-Mapper
GCA_000351865.1	PGAP	Bakta	Bakta	Prokka	Bakta/PGAP/Prokka	Bakta/PGAP/Prokka	PGAP	Bakta	Bakta	EggNOG-Mapper	Prokka	Prokka	Bakta	EggNOG-Mapper	EggNOG-Mapper	EggNOG-Mapper
GCA_000351885.1	PGAP	Bakta	Bakta	Bakta/Prokka	Bakta	Bakta/PGAP/Prokka	PGAP	Bakta	Bakta	EggNOG-Mapper	Prokka	Prokka	Bakta	EggNOG-Mapper	EggNOG-Mapper	EggNOG-Mapper
GCA_000351905.1	PGAP	Bakta	Bakta	Prokka	Bakta	Bakta/PGAP/Prokka	PGAP	Bakta	Bakta	EggNOG-Mapper	Prokka	Prokka	Bakta	EggNOG-Mapper	EggNOG-Mapper	EggNOG-Mapper
GCA_000351925.1	PGAP	Bakta	Bakta	Prokka	Bakta	Bakta/PGAP/Prokka	PGAP	Bakta	Bakta	EggNOG-Mapper	Prokka	Prokka	Bakta	EggNOG-Mapper	EggNOG-Mapper	EggNOG-Mapper
GCA_000351945.1	PGAP	Bakta	Bakta	Prokka	Bakta	Bakta/PGAP/Prokka	PGAP	Bakta	Bakta	EggNOG-Mapper	Prokka	Prokka	Bakta	EggNOG-Mapper	EggNOG-Mapper	EggNOG-Mapper
GCA_000351965.1	PGAP	Bakta	Bakta	Prokka	Bakta/PGAP/Prokka	Bakta/PGAP/Prokka	PGAP	Bakta	Bakta	EggNOG-Mapper	Prokka	Prokka	Bakta	EggNOG-Mapper	EggNOG-Mapper	EggNOG-Mapper
GCA_000351985.1	PGAP	Bakta	Bakta	Prokka	Bakta	Bakta/PGAP/Prokka	PGAP	Bakta	Bakta	EggNOG-Mapper	Prokka	EggNOG-Mapper	Bakta	EggNOG-Mapper	EggNOG-Mapper	EggNOG-Mapper
GCA_000352005.1	PGAP	Bakta	Bakta	PGAP/Prokka	Bakta	Bakta/PGAP/Prokka	PGAP	Bakta	Bakta	EggNOG-Mapper	Prokka	Prokka	Bakta	EggNOG-Mapper	EggNOG-Mapper	EggNOG-Mapper
GCA_000352025.1	PGAP	Bakta	Bakta	PGAP	Bakta	Bakta/PGAP/Prokka	PGAP	Bakta	Bakta	EggNOG-Mapper	Prokka	Prokka	Bakta	EggNOG-Mapper	EggNOG-Mapper	EggNOG-Mapper
GCA_000352045.1	PGAP	Bakta	Bakta	Bakta/PGAP/Prokka	Bakta	Bakta/PGAP/Prokka	PGAP	Bakta	Bakta	EggNOG-Mapper	Prokka	Prokka	Bakta	EggNOG-Mapper	EggNOG-Mapper	EggNOG-Mapper
GCA_000352065.1	PGAP	Bakta	Bakta	PGAP/Prokka	Bakta	Bakta/PGAP/Prokka	PGAP	Bakta	Bakta	EggNOG-Mapper	Prokka	Prokka	Bakta	EggNOG-Mapper	EggNOG-Mapper	EggNOG-Mapper
GCA_000352085.1	PGAP	Bakta	Bakta	Bakta/Prokka	Bakta/PGAP/Prokka	Bakta/PGAP/Prokka	PGAP	Bakta	Bakta	EggNOG-Mapper	Prokka	Prokka	Bakta	EggNOG-Mapper	EggNOG-Mapper	EggNOG-Mapper
GCA_000352105.1	PGAP	Bakta	Bakta	Prokka	Bakta	Bakta/PGAP/Prokka	Bakta	Bakta	Bakta	EggNOG-Mapper	Prokka	Prokka	Bakta	EggNOG-Mapper	EggNOG-Mapper	EggNOG-Mapper
GCA_000352125.1	PGAP	Bakta	Bakta	Prokka	Bakta	Bakta/PGAP/Prokka	PGAP	Bakta	Bakta	EggNOG-Mapper	Prokka	Prokka	Bakta	EggNOG-Mapper	EggNOG-Mapper	EggNOG-Mapper
GCA_000352145.1	PGAP	Bakta	Bakta	PGAP	Bakta/PGAP/Prokka	Bakta/PGAP/Prokka	PGAP	Bakta	Bakta	Prokka	Prokka	Prokka	Bakta	EggNOG-Mapper	EggNOG-Mapper	EggNOG-Mapper
GCA_000352165.1	PGAP	Bakta	Bakta	Prokka	Bakta/PGAP/Prokka	Bakta/PGAP/Prokka	PGAP	Bakta	Bakta	EggNOG-Mapper	Prokka	Prokka	Bakta	EggNOG-Mapper	EggNOG-Mapper	EggNOG-Mapper
GCA_000352185.1	PGAP	Bakta	Bakta	PGAP	Bakta	Bakta/PGAP/Prokka	PGAP	Bakta	Bakta	EggNOG-Mapper	Prokka	Prokka	Bakta	EggNOG-Mapper	EggNOG-Mapper	EggNOG-Mapper
GCA_000352205.1	PGAP	Bakta	Bakta	Prokka	Bakta/PGAP/Prokka	Bakta/PGAP/Prokka	PGAP	Bakta	Bakta	PGAP	Prokka	Prokka	Bakta	EggNOG-Mapper	EggNOG-Mapper	EggNOG-Mapper
GCA_000352225.1	PGAP	Bakta	Bakta	Bakta/PGAP/Prokka	Bakta	Bakta/PGAP/Prokka	PGAP	Bakta	Bakta	EggNOG-Mapper	Prokka	Prokka	Bakta	EggNOG-Mapper	EggNOG-Mapper	EggNOG-Mapper
GCA_000352245.1	PGAP	Bakta	Bakta	Bakta/PGAP/Prokka	Bakta/PGAP/Prokka	Bakta/PGAP/Prokka	PGAP	Bakta	Bakta	EggNOG-Mapper	Prokka	Prokka	Bakta	EggNOG-Mapper	EggNOG-Mapper	EggNOG-Mapper
GCA_000352265.1	PGAP	Bakta	Bakta	Prokka	Bakta	Bakta/PGAP/Prokka	PGAP	Bakta	Bakta	EggNOG-Mapper	Prokka	Prokka	Bakta	EggNOG-Mapper	EggNOG-Mapper	EggNOG-Mapper
GCA_000352285.1	PGAP	Bakta	Bakta	Bakta/Prokka	Bakta/PGAP/Prokka	Bakta/PGAP/Prokka	PGAP	Bakta	Bakta	EggNOG-Mapper	Prokka	Prokka	Bakta	EggNOG-Mapper	EggNOG-Mapper	EggNOG-Mapper
GCA_000352305.1	PGAP	Bakta	Bakta	Prokka	Bakta	Bakta/PGAP/Prokka	PGAP	Bakta	Bakta	EggNOG-Mapper	Prokka	Prokka	Bakta	EggNOG-Mapper	EggNOG-Mapper	EggNOG-Mapper
GCA_000352325.1	PGAP	Bakta	Bakta	Prokka	Bakta	Bakta/PGAP/Prokka	PGAP	Bakta	Bakta	EggNOG-Mapper	Prokka	Prokka	Bakta	EggNOG-Mapper	EggNOG-Mapper	EggNOG-Mapper
GCA_000352345.1	Bakta	Bakta	Bakta	Prokka	Bakta	Bakta/PGAP/Prokka	PGAP	Bakta	Bakta	EggNOG-Mapper	Prokka	Prokka	Bakta	EggNOG-Mapper	EggNOG-Mapper	EggNOG-Mapper
GCA_000352365.1	PGAP	Bakta	Bakta	Prokka	Bakta	Bakta/PGAP/Prokka	PGAP	Bakta	Bakta	EggNOG-Mapper	Prokka	Prokka	Bakta	EggNOG-Mapper	EggNOG-Mapper	EggNOG-Mapper
GCA_000352385.1	PGAP	Bakta	Bakta	Prokka	Bakta/PGAP/Prokka	Bakta/PGAP/Prokka	PGAP	Bakta	Bakta	EggNOG-Mapper	Prokka	Prokka	Bakta	EggNOG-Mapper	EggNOG-Mapper	EggNOG-Mapper
GCA_000352405.1	PGAP	Bakta	Bakta	Prokka	Bakta/PGAP/Prokka	Bakta/PGAP/Prokka	PGAP	Bakta	Bakta	EggNOG-Mapper	Prokka	Prokka	Bakta	EggNOG-Mapper	EggNOG-Mapper	EggNOG-Mapper
GCA_000352425.1	PGAP	Bakta	Bakta	PGAP/Prokka	Bakta/PGAP/Prokka	Bakta/PGAP/Prokka	Bakta	Bakta	Bakta	EggNOG-Mapper	Prokka	EggNOG-Mapper	Bakta	EggNOG-Mapper	EggNOG-Mapper	EggNOG-Mapper
GCA_000352445.1	PGAP	Bakta	Bakta	Prokka	Bakta/PGAP/Prokka	Bakta/PGAP/Prokka	PGAP	Bakta	Bakta	EggNOG-Mapper	Prokka	Prokka	Bakta	EggNOG-Mapper	EggNOG-Mapper	EggNOG-Mapper
GCA_000352465.1	PGAP	Bakta	Bakta	Prokka	Bakta	Bakta/PGAP/Prokka	PGAP	Bakta	Bakta	EggNOG-Mapper	Prokka	Prokka	Bakta	EggNOG-Mapper	EggNOG-Mapper	EggNOG-Mapper
GCA_000352485.1	PGAP	Bakta	Bakta	PGAP	Bakta	Bakta/PGAP/Prokka	PGAP	Bakta	Bakta	EggNOG-Mapper	Prokka	Prokka	Bakta	EggNOG-Mapper	EggNOG-Mapper	EggNOG-Mapper
GCA_000352505.1	PGAP	Bakta	Bakta	Prokka	Bakta	Bakta/PGAP/Prokka	PGAP	Bakta	Bakta	EggNOG-Mapper	Prokka	Prokka	Bakta	EggNOG-Mapper	EggNOG-Mapper	EggNOG-Mapper
GCA_000352525.1	PGAP	Bakta	Bakta	PGAP	Bakta	Bakta	PGAP	Bakta	Bakta	EggNOG-Mapper	Prokka	Prokka	Bakta	EggNOG-Mapper	EggNOG-Mapper	EggNOG-Mapper
GCA_000352545.1	PGAP	Bakta	Bakta	Prokka	Bakta/PGAP/Prokka	Bakta/PGAP/Prokka	PGAP	Bakta	Bakta	EggNOG-Mapper	Prokka	Prokka	Bakta	EggNOG-Mapper	EggNOG-Mapper	EggNOG-Mapper
GCA_000352565.1	PGAP	Bakta	Bakta	Bakta/PGAP/Prokka	Bakta	Bakta/PGAP/Prokka	PGAP	Bakta	Bakta	PGAP	Prokka	Prokka	Bakta	EggNOG-Mapper	EggNOG-Mapper	EggNOG-Mapper
GCA_000352585.1	Bakta	Bakta	Bakta	Prokka	Bakta	Bakta/PGAP/Prokka	PGAP	Bakta	Bakta	EggNOG-Mapper	Prokka	Prokka	Bakta	EggNOG-Mapper	EggNOG-Mapper	EggNOG-Mapper
GCA_000352605.1	PGAP	Bakta	Bakta	Prokka	Bakta/PGAP/Prokka	Bakta/PGAP/Prokka	PGAP	Bakta	Bakta	EggNOG-Mapper	Prokka	Prokka	Bakta	EggNOG-Mapper	EggNOG-Mapper	EggNOG-Mapper
GCA_000352625.1	PGAP	Bakta	Bakta	Prokka	Bakta	Bakta/PGAP/Prokka	PGAP	Bakta	Bakta	EggNOG-Mapper	Prokka	Prokka	Bakta	EggNOG-Mapper	EggNOG-Mapper	EggNOG-Mapper
GCA_000352645.1	PGAP	Bakta	Bakta	Prokka	Bakta	Bakta/PGAP/Prokka	PGAP	Bakta	Bakta	EggNOG-Mapper	Prokka	Prokka	Bakta	EggNOG-Mapper	EggNOG-Mapper	EggNOG-Mapper
GCA_000352665.1	PGAP	Bakta	Bakta	Prokka	Bakta	Bakta/PGAP/Prokka	PGAP	Bakta	Bakta	EggNOG-Mapper	Prokka	Prokka	Bakta	EggNOG-Mapper	EggNOG-Mapper	EggNOG-Mapper
GCA_000352685.1	PGAP	Bakta	Bakta	Bakta/Prokka	Bakta	Bakta/PGAP/Prokka	PGAP	Bakta	Bakta	EggNOG-Mapper	Prokka	Prokka	Bakta	EggNOG-Mapper	EggNOG-Mapper	EggNOG-Mapper
GCA_000352705.1	PGAP	Bakta	Bakta	Bakta/Prokka	Bakta/PGAP/Prokka	Bakta/PGAP/Prokka	PGAP	Bakta	Bakta	EggNOG-Mapper	Prokka	Prokka	Bakta	EggNOG-Mapper	EggNOG-Mapper	EggNOG-Mapper
GCA_000352725.1	PGAP	Bakta	Bakta	Prokka	Bakta/PGAP/Prokka	Bakta/PGAP/Prokka	PGAP	Bakta	Bakta	EggNOG-Mapper	Prokka	Prokka	Bakta	EggNOG-Mapper	EggNOG-Mapper	EggNOG-Mapper
GCA_000352745.1	Bakta/PGAP	Bakta	Bakta	Prokka	Bakta	Bakta/PGAP/Prokka	PGAP	Bakta	Bakta	EggNOG-Mapper	Prokka	Prokka	Bakta	EggNOG-Mapper	EggNOG-Mapper	EggNOG-Mapper
GCA_000352765.1	PGAP	Bakta	Bakta	Prokka	Bakta	Bakta/PGAP/Prokka	PGAP	Bakta	Bakta	EggNOG-Mapper	Prokka	Prokka	Bakta	EggNOG-Mapper	EggNOG-Mapper	EggNOG-Mapper
GCA_000352785.1	PGAP	Bakta	Bakta	PGAP	Bakta/PGAP/Prokka	Bakta/PGAP/Prokka	PGAP	Bakta	Bakta	EggNOG-Mapper	Prokka	Prokka	Bakta	EggNOG-Mapper	EggNOG-Mapper	EggNOG-Mapper
GCA_000352805.1	PGAP	Bakta	Bakta	PGAP/Prokka	Bakta/PGAP/Prokka	Bakta/PGAP/Prokka	PGAP	Bakta	Bakta	EggNOG-Mapper	Prokka	Prokka	Bakta	EggNOG-Mapper	EggNOG-Mapper	EggNOG-Mapper
GCA_000352825.1	PGAP	Bakta	Bakta	Prokka	Bakta	Bakta/PGAP/Prokka	PGAP	Bakta	Bakta	EggNOG-Mapper	Prokka	Prokka	Bakta	EggNOG-Mapper	EggNOG-Mapper	EggNOG-Mapper
GCA_000352845.1	PGAP	Bakta	Bakta	Bakta/PGAP/Prokka	Bakta	Bakta/PGAP/Prokka	PGAP	Bakta	Bakta	EggNOG-Mapper	Prokka	Prokka	Bakta	EggNOG-Mapper	EggNOG-Mapper	EggNOG-Mapper
GCA_000352865.1	PGAP	Bakta	Bakta	Bakta/Prokka	Bakta	Bakta/PGAP/Prokka	PGAP	Bakta	Bakta	PGAP	Prokka	Prokka	Bakta	EggNOG-Mapper	EggNOG-Mapper	EggNOG-Mapper
GCA_000352885.1	PGAP	Bakta	Bakta	Prokka	Bakta	Bakta/PGAP/Prokka	PGAP	Bakta	Bakta	EggNOG-Mapper	Prokka	Prokka	Bakta	EggNOG-Mapper	EggNOG-Mapper	EggNOG-Mapper
GCA_000352905.1	PGAP	Bakta	Bakta	Bakta/Prokka	Bakta	Bakta/PGAP/Prokka	PGAP	Bakta	Bakta	EggNOG-Mapper	Prokka	Prokka	Bakta	EggNOG-Mapper	EggNOG-Mapper	EggNOG-Mapper
GCA_000352925.1	PGAP	Bakta	Bakta	Prokka	Bakta/PGAP/Prokka	Bakta/PGAP/Prokka	PGAP	Bakta	Bakta	EggNOG-Mapper	Prokka	Prokka	Bakta	EggNOG-Mapper	EggNOG-Mapper	EggNOG-Mapper
GCA_000352945.1	PGAP	Bakta	Bakta	Prokka	Bakta	Bakta/PGAP/Prokka	PGAP	Bakta	Bakta	EggNOG-Mapper	Prokka	Prokka	Bakta	EggNOG-Mapper	EggNOG-Mapper	EggNOG-Mapper
GCA_000352965.1	PGAP	Bakta	Bakta	PGAP/Prokka	Bakta	Bakta/PGAP/Prokka	PGAP	Bakta	Bakta	EggNOG-Mapper	Prokka	Prokka	Bakta	EggNOG-Mapper	EggNOG-Mapper	EggNOG-Mapper
GCA_000352985.1	PGAP	Bakta	Bakta	Bakta/Prokka	Bakta	Bakta/PGAP/Prokka	PGAP	Bakta	Bakta	EggNOG-Mapper	Prokka	Prokka	Bakta	EggNOG-Mapper	EggNOG-Mapper	EggNOG-Mapper
GCA_000353005.1	PGAP	Bakta	Bakta	Bakta/Prokka	Bakta	Bakta/PGAP/Prokka	PGAP	Bakta	Bakta	EggNOG-Mapper	Prokka	Prokka	Bakta	EggNOG-Mapper	EggNOG-Mapper	EggNOG-Mapper
GCA_000353025.1	PGAP	Bakta	Bakta	Prokka	Bakta	Bakta/PGAP/Prokka	PGAP	Bakta	Bakta	EggNOG-Mapper	Prokka	Prokka	Bakta	EggNOG-Mapper	EggNOG-Mapper	EggNOG-Mapper
GCA_000353045.1	PGAP	Bakta	Bakta	PGAP	Bakta	Bakta/PGAP/Prokka	PGAP	Bakta	Bakta	PGAP	Prokka	Prokka	Bakta	EggNOG-Mapper	EggNOG-Mapper	EggNOG-Mapper
GCA_000353065.1	PGAP	Bakta	Bakta	Prokka	Bakta/PGAP/Prokka	Bakta/PGAP/Prokka	PGAP	Bakta	Bakta	EggNOG-Mapper	Prokka	Prokka	Bakta	EggNOG-Mapper	EggNOG-Mapper	EggNOG-Mapper
GCA_000353085.1	PGAP	Bakta	Bakta	Prokka	Bakta/PGAP/Prokka	Bakta/PGAP/Prokka	PGAP	Bakta	Bakta	EggNOG-Mapper	Prokka	Prokka	Bakta	EggNOG-Mapper	EggNOG-Mapper	EggNOG-Mapper
GCA_000353105.1	PGAP	Bakta	Bakta	Prokka	Bakta	Bakta/PGAP/Prokka	PGAP	Bakta	Bakta	EggNOG-Mapper	Prokka	Prokka	Bakta	EggNOG-Mapper	EggNOG-Mapper	EggNOG-Mapper
GCA_000353125.1	PGAP	Bakta	Bakta	Prokka	Bakta	Bakta/PGAP/Prokka	PGAP	Bakta	Bakta	EggNOG-Mapper	Prokka	Prokka	Bakta	EggNOG-Mapper	EggNOG-Mapper	EggNOG-Mapper
GCA_000353145.1	PGAP	Bakta	Bakta	Prokka	Bakta/PGAP/Prokka	Bakta/PGAP/Prokka	PGAP	Bakta	Bakta	EggNOG-Mapper	Prokka	Prokka	Bakta	EggNOG-Mapper	EggNOG-Mapper	EggNOG-Mapper
GCA_000353165.1	PGAP	Bakta	Bakta	Prokka	Bakta/PGAP/Prokka	Bakta/PGAP/Prokka	PGAP	Bakta	Bakta	EggNOG-Mapper	Prokka	Prokka	Bakta	EggNOG-Mapper	EggNOG-Mapper	EggNOG-Mapper
GCA_000353185.1	PGAP	Bakta	Bakta	PGAP	Bakta	Bakta/PGAP/Prokka	PGAP	Bakta	Bakta	Prokka	Prokka	Prokka	Bakta	EggNOG-Mapper	EggNOG-Mapper	EggNOG-Mapper
GCA_000353545.1	PGAP	Bakta	Bakta	Bakta/PGAP/Prokka	Bakta	Bakta/PGAP/Prokka	PGAP	Bakta	Bakta	Prokka	Prokka	EggNOG-Mapper	Bakta	EggNOG-Mapper	EggNOG-Mapper	EggNOG-Mapper
GCA_000354275.2	PGAP	Bakta	Bakta	PGAP	Bakta	Bakta/PGAP/Prokka	PGAP	Bakta	Bakta	Prokka	Prokka	Prokka	Bakta	EggNOG-Mapper	EggNOG-Mapper	EggNOG-Mapper
GCA_000354295.1	PGAP	Bakta	Bakta	PGAP	Bakta	Bakta/PGAP/Prokka	PGAP	Bakta	Bakta	Prokka	Prokka	Prokka	Bakta	EggNOG-Mapper	EggNOG-Mapper	EggNOG-Mapper
GCA_000354315.2	PGAP	Bakta	Bakta	PGAP	Bakta	Bakta/PGAP/Prokka	PGAP	Bakta	Bakta	Prokka	Prokka	Prokka	Bakta	EggNOG-Mapper	EggNOG-Mapper	EggNOG-Mapper
GCA_000354335.2	PGAP	Bakta	Bakta	PGAP	Bakta	Bakta/PGAP/Prokka	PGAP	Bakta	Bakta	Prokka	Prokka	Prokka	Bakta	EggNOG-Mapper	EggNOG-Mapper	EggNOG-Mapper
GCA_000354355.2	PGAP	Bakta	Bakta	PGAP	Bakta	Bakta/PGAP/Prokka	PGAP	Bakta	Bakta	Prokka	Prokka	Prokka	Bakta	EggNOG-Mapper	EggNOG-Mapper	EggNOG-Mapper
GCA_000354375.2	PGAP	Bakta	Bakta	PGAP	Bakta	Bakta/PGAP/Prokka	PGAP	Bakta	Bakta	Prokka	Prokka	Prokka	EggNOG-Mapper	EggNOG-Mapper	EggNOG-Mapper	EggNOG-Mapper
GCA_000354395.1	PGAP	Bakta	Bakta	PGAP	Bakta	Bakta/PGAP/Prokka	PGAP	PGAP	Bakta	Prokka	Prokka	Prokka	EggNOG-Mapper	EggNOG-Mapper	EggNOG-Mapper	EggNOG-Mapper
GCA_000354415.2	PGAP	Bakta	Bakta	PGAP	Bakta	Bakta/PGAP/Prokka	PGAP	Bakta	Bakta	Prokka	Prokka	Prokka	Bakta	EggNOG-Mapper	EggNOG-Mapper	EggNOG-Mapper
GCA_000354435.2	PGAP	Bakta	Bakta	PGAP	Bakta	Bakta/PGAP/Prokka	PGAP	Bakta	Bakta	Prokka	Prokka	Prokka	Bakta	EggNOG-Mapper	EggNOG-Mapper	EggNOG-Mapper
GCA_000354455.1	PGAP	Bakta	Bakta	PGAP	Bakta	Bakta/PGAP/Prokka	PGAP	Bakta	Bakta	Prokka	Prokka	Prokka	Bakta	EggNOG-Mapper	EggNOG-Mapper	EggNOG-Mapper
GCA_000354475.2	PGAP	Bakta	Bakta	PGAP	Bakta	Bakta/PGAP/Prokka	PGAP	Bakta	Bakta	Prokka	Prokka	Prokka	EggNOG-Mapper	EggNOG-Mapper	EggNOG-Mapper	EggNOG-Mapper
GCA_000354495.2	PGAP	Bakta	Bakta	PGAP	Bakta	Bakta/PGAP/Prokka	PGAP	Bakta	Bakta	Prokka	Prokka	Prokka	Bakta	EggNOG-Mapper	EggNOG-Mapper	EggNOG-Mapper
GCA_000354515.2	PGAP	Bakta	Bakta	PGAP	Bakta	Bakta/PGAP/Prokka	PGAP	Bakta	Bakta	Prokka	Prokka	Prokka	Bakta	EggNOG-Mapper	EggNOG-Mapper	EggNOG-Mapper
GCA_000354535.2	PGAP	Bakta	Bakta	PGAP	Bakta	Bakta/PGAP/Prokka	PGAP	Bakta	Bakta	Prokka	Prokka	Prokka	EggNOG-Mapper	EggNOG-Mapper	EggNOG-Mapper	EggNOG-Mapper
GCA_000354555.2	PGAP	Bakta	Bakta	PGAP	Bakta	Bakta/PGAP/Prokka	PGAP	Bakta	Bakta	Prokka	Prokka	Prokka	EggNOG-Mapper	EggNOG-Mapper	EggNOG-Mapper	EggNOG-Mapper
GCA_000354575.2	PGAP	Bakta	Bakta	Bakta/PGAP/Prokka	Bakta	Bakta/PGAP/Prokka	PGAP	Bakta	Bakta	Prokka	Prokka	Prokka	Bakta	EggNOG-Mapper	EggNOG-Mapper	EggNOG-Mapper
GCA_000354595.1	PGAP	Bakta	Bakta	PGAP	Bakta	Bakta/PGAP/Prokka	PGAP	Bakta	Bakta	Prokka	Prokka	Prokka	Bakta	EggNOG-Mapper	EggNOG-Mapper	EggNOG-Mapper
GCA_000354615.2	PGAP	Bakta	Bakta	PGAP	Bakta	Bakta/PGAP/Prokka	PGAP	Bakta	Bakta	Prokka	Prokka	Prokka	Bakta	EggNOG-Mapper	EggNOG-Mapper	EggNOG-Mapper
GCA_000354735.2	PGAP	Bakta	Bakta	PGAP	Bakta	Bakta/PGAP/Prokka	PGAP	Bakta	Bakta	PGAP	Prokka	Prokka	Bakta	Bakta	EggNOG-Mapper	EggNOG-Mapper
GCA_000354755.2	PGAP	Bakta	Bakta	PGAP	Bakta	Bakta/PGAP/Prokka	PGAP	Bakta	Bakta	Prokka	Prokka	Prokka	Bakta	EggNOG-Mapper	EggNOG-Mapper	EggNOG-Mapper
GCA_000354775.2	PGAP	Bakta	Bakta	PGAP	Bakta/PGAP/Prokka	Bakta/PGAP/Prokka	PGAP	Bakta	Bakta	Prokka	Prokka	Prokka	Bakta	EggNOG-Mapper	EggNOG-Mapper	EggNOG-Mapper
GCA_000354795.2	PGAP	Bakta	Bakta	PGAP	Bakta/PGAP/Prokka	Bakta/PGAP/Prokka	PGAP	Bakta	Bakta	PGAP	Prokka	Prokka	Bakta	EggNOG-Mapper	EggNOG-Mapper	EggNOG-Mapper
GCA_000354815.2	PGAP	Bakta	Bakta	PGAP	Bakta	Bakta/PGAP/Prokka	PGAP	Bakta	Bakta	Prokka	Prokka	Prokka	Bakta	EggNOG-Mapper	EggNOG-Mapper	EggNOG-Mapper
GCA_000354835.2	PGAP	Bakta	Bakta	PGAP	Bakta	Bakta/PGAP/Prokka	PGAP	Bakta	Bakta	Prokka	Prokka	Prokka	Bakta	EggNOG-Mapper	EggNOG-Mapper	EggNOG-Mapper
GCA_000354855.1	PGAP	Bakta	Bakta	PGAP	Bakta	Bakta/PGAP/Prokka	PGAP	Bakta	Bakta	PGAP	Prokka	Prokka	Bakta	EggNOG-Mapper	EggNOG-Mapper	EggNOG-Mapper
GCA_000354875.1	PGAP	Bakta	Bakta	PGAP	Bakta/PGAP/Prokka	Bakta/PGAP/Prokka	PGAP	Bakta	Bakta	Prokka	Prokka	Prokka	Bakta	EggNOG-Mapper	EggNOG-Mapper	EggNOG-Mapper
GCA_000354895.2	PGAP	Bakta	Bakta	PGAP	Bakta	Bakta/PGAP/Prokka	PGAP	Bakta	Bakta	Prokka	Prokka	Prokka	Bakta	EggNOG-Mapper	EggNOG-Mapper	EggNOG-Mapper
GCA_000354915.1	PGAP	Bakta	Bakta	PGAP	Bakta	Bakta/PGAP/Prokka	PGAP	PGAP	Bakta	Prokka	Prokka	Prokka	Bakta	Bakta	EggNOG-Mapper	EggNOG-Mapper
GCA_000354935.2	PGAP	Bakta	Bakta	PGAP	Bakta	Bakta/PGAP/Prokka	PGAP	Bakta	Bakta	Prokka	Prokka	Prokka	Bakta	EggNOG-Mapper	EggNOG-Mapper	EggNOG-Mapper
GCA_000354955.1	PGAP	Bakta	Bakta	PGAP	Bakta	Bakta/PGAP/Prokka	PGAP	Bakta	Bakta	Prokka	Prokka	Prokka	Bakta	EggNOG-Mapper	EggNOG-Mapper	EggNOG-Mapper
GCA_000354975.1	PGAP	Bakta	Bakta	PGAP	Bakta	Bakta/PGAP/Prokka	PGAP	Bakta	Bakta	Prokka	Prokka	Prokka	Bakta	EggNOG-Mapper	EggNOG-Mapper	EggNOG-Mapper
GCA_000354995.2	PGAP	Bakta	Bakta	PGAP	Bakta/PGAP/Prokka	Bakta/PGAP/Prokka	PGAP	Bakta	Bakta	Prokka	Prokka	Prokka	Bakta	EggNOG-Mapper	EggNOG-Mapper	EggNOG-Mapper
GCA_000355015.2	PGAP	Bakta	Bakta	PGAP	Bakta	Bakta/PGAP/Prokka	PGAP	Bakta	Bakta	Prokka	Prokka	Prokka	Bakta	EggNOG-Mapper	EggNOG-Mapper	EggNOG-Mapper
GCA_000355035.2	PGAP	Bakta	Bakta	PGAP	Bakta	Bakta/PGAP/Prokka	PGAP	Bakta	Bakta	Prokka	Prokka	Prokka	Bakta	EggNOG-Mapper	EggNOG-Mapper	EggNOG-Mapper
GCA_000355055.1	PGAP	Bakta	Bakta	PGAP	Bakta	Bakta/PGAP/Prokka	PGAP	Bakta	Bakta	Prokka	Prokka	Prokka	Bakta	EggNOG-Mapper	EggNOG-Mapper	EggNOG-Mapper
GCA_000355075.2	PGAP	Bakta	Bakta	PGAP/Prokka	Bakta	Bakta/PGAP/Prokka	PGAP	Bakta	Bakta	Prokka	Prokka	Prokka	Bakta	EggNOG-Mapper	EggNOG-Mapper	EggNOG-Mapper
GCA_000355095.2	PGAP	Bakta	Bakta	PGAP	Bakta	Bakta/PGAP/Prokka	PGAP	Bakta	Bakta	Prokka	Prokka	Prokka	Bakta	EggNOG-Mapper	EggNOG-Mapper	EggNOG-Mapper
GCA_000355115.2	PGAP	Bakta	Bakta	PGAP	Bakta/PGAP/Prokka	Bakta/PGAP/Prokka	PGAP	Bakta	Bakta	PGAP	Prokka	Prokka	Bakta	EggNOG-Mapper	EggNOG-Mapper	EggNOG-Mapper
GCA_000355155.2	PGAP	Bakta	Bakta	PGAP	Bakta	Bakta/PGAP/Prokka	PGAP	Bakta	Bakta	PGAP	Prokka	Prokka	Bakta	EggNOG-Mapper	EggNOG-Mapper	EggNOG-Mapper
GCA_000355175.1	PGAP	Bakta	Bakta	Bakta/PGAP/Prokka	Bakta	Bakta/PGAP/Prokka	PGAP	Bakta	Bakta	PGAP	Prokka	Prokka	Bakta	EggNOG-Mapper	EggNOG-Mapper	EggNOG-Mapper
GCA_000355195.2	PGAP	Bakta	Bakta	PGAP	Bakta	Bakta/PGAP/Prokka	PGAP	Bakta	Bakta	PGAP	Prokka	Prokka	Bakta	EggNOG-Mapper	EggNOG-Mapper	EggNOG-Mapper
GCA_000355215.2	PGAP	Bakta	Bakta	PGAP	Bakta	Bakta/PGAP/Prokka	PGAP	Bakta	Bakta	PGAP	Prokka	Prokka	Bakta	EggNOG-Mapper	EggNOG-Mapper	EggNOG-Mapper
GCA_000355235.2	PGAP	Bakta	Bakta	PGAP	Bakta/PGAP/Prokka	Bakta/PGAP/Prokka	PGAP	Bakta	Bakta	Prokka	Prokka	Prokka	Bakta	EggNOG-Mapper	EggNOG-Mapper	EggNOG-Mapper
GCA_000355255.2	PGAP	Bakta	Bakta	PGAP	Bakta	Bakta/PGAP/Prokka	PGAP	Bakta	Bakta	PGAP	Prokka	Prokka	Bakta	EggNOG-Mapper	EggNOG-Mapper	EggNOG-Mapper
GCA_000355275.2	PGAP	Bakta	Bakta	PGAP	Bakta	Bakta/PGAP/Prokka	PGAP	Bakta	Bakta	PGAP	Prokka	Prokka	Bakta	EggNOG-Mapper	EggNOG-Mapper	EggNOG-Mapper
GCA_000355295.1	PGAP	Bakta	Bakta	PGAP	Bakta	Bakta/PGAP/Prokka	PGAP	Bakta	Bakta	Prokka	Prokka	Prokka	Bakta	EggNOG-Mapper	EggNOG-Mapper	EggNOG-Mapper
GCA_000355315.2	PGAP	Bakta	Bakta	PGAP	Bakta	Bakta/PGAP/Prokka	PGAP	Bakta	Bakta	PGAP	Prokka	Prokka	Bakta	EggNOG-Mapper	EggNOG-Mapper	EggNOG-Mapper
GCA_000355335.2	PGAP	Bakta	Bakta	PGAP	Bakta	Bakta/PGAP/Prokka	PGAP	Bakta	Bakta	Prokka	Prokka	Prokka	Bakta	EggNOG-Mapper	EggNOG-Mapper	EggNOG-Mapper
GCA_000355355.1	PGAP	Bakta	Bakta	PGAP	Bakta	Bakta/PGAP/Prokka	PGAP	Bakta	Bakta	Prokka	Prokka	Prokka	Bakta	EggNOG-Mapper	EggNOG-Mapper	EggNOG-Mapper
GCA_000355375.2	PGAP	Bakta	Bakta	PGAP	Bakta	Bakta/PGAP/Prokka	PGAP	Bakta	Bakta	Prokka	Prokka	Prokka	EggNOG-Mapper	EggNOG-Mapper	EggNOG-Mapper	EggNOG-Mapper
GCA_000355395.2	PGAP	Bakta	Bakta	PGAP	Bakta	Bakta/PGAP/Prokka	PGAP	Bakta	Bakta	Prokka	Prokka	Prokka	Bakta	EggNOG-Mapper	EggNOG-Mapper	EggNOG-Mapper
GCA_000355415.2	PGAP	Bakta	Bakta	PGAP	Bakta	Bakta/PGAP/Prokka	PGAP	Bakta	Bakta	Prokka	Prokka	Prokka	Bakta	EggNOG-Mapper	EggNOG-Mapper	EggNOG-Mapper
GCA_000355435.2	PGAP	Bakta	Bakta	PGAP	Bakta/PGAP/Prokka	Bakta/PGAP/Prokka	PGAP	Bakta	Bakta	Prokka	Prokka	Prokka	Bakta	EggNOG-Mapper	EggNOG-Mapper	EggNOG-Mapper
GCA_000355475.2	PGAP	Bakta	Bakta	PGAP	Bakta	Bakta/PGAP/Prokka	PGAP	Bakta	Bakta	PGAP	Prokka	Prokka	Bakta	EggNOG-Mapper	EggNOG-Mapper	EggNOG-Mapper
GCA_000355495.2	PGAP	Bakta	Bakta	PGAP	Bakta	Bakta/PGAP/Prokka	PGAP	Bakta	Bakta	Prokka	Prokka	Prokka	Bakta	EggNOG-Mapper	EggNOG-Mapper	EggNOG-Mapper
GCA_000355515.2	PGAP	Bakta	Bakta	PGAP	Bakta	Bakta/PGAP/Prokka	PGAP	Bakta	Bakta	PGAP	Prokka	Prokka	Bakta	EggNOG-Mapper	EggNOG-Mapper	EggNOG-Mapper
GCA_000355535.1	PGAP	Bakta	Bakta	PGAP	Bakta	Bakta/PGAP/Prokka	PGAP	Bakta	Bakta	Prokka	Prokka	Prokka	Bakta	EggNOG-Mapper	EggNOG-Mapper	EggNOG-Mapper
GCA_000355555.2	PGAP	Bakta	Bakta	PGAP	Bakta/PGAP/Prokka	Bakta/PGAP/Prokka	PGAP	Bakta	Bakta	Prokka	Prokka	Prokka	Bakta	EggNOG-Mapper	EggNOG-Mapper	EggNOG-Mapper
GCA_000355575.2	PGAP	Bakta	Bakta	PGAP	Bakta	Bakta/PGAP/Prokka	PGAP	Bakta	Bakta	Prokka	Prokka	Prokka	Bakta	EggNOG-Mapper	EggNOG-Mapper	EggNOG-Mapper
GCA_000355595.1	PGAP	Bakta	Bakta	PGAP	Bakta	Bakta/PGAP/Prokka	PGAP	Bakta	Bakta	Prokka	Prokka	Prokka	Bakta	EggNOG-Mapper	EggNOG-Mapper	EggNOG-Mapper
GCA_000355615.2	PGAP	Bakta	Bakta	PGAP	Bakta	Bakta/PGAP/Prokka	PGAP	Bakta	Bakta	Prokka	Prokka	Prokka	Bakta	EggNOG-Mapper	EggNOG-Mapper	EggNOG-Mapper
GCA_000356005.2	PGAP	Bakta	Bakta	PGAP	Bakta	Bakta/PGAP/Prokka	PGAP	Bakta	Bakta	Prokka	Prokka	Prokka	Bakta	EggNOG-Mapper	EggNOG-Mapper	EggNOG-Mapper
GCA_000356025.2	PGAP	Bakta	Bakta	PGAP	Bakta	Bakta/PGAP/Prokka	PGAP	Bakta	Bakta	Prokka	Prokka	Prokka	Bakta	EggNOG-Mapper	EggNOG-Mapper	EggNOG-Mapper
GCA_000356045.2	PGAP	Bakta	Bakta	PGAP	Bakta	Bakta/PGAP/Prokka	PGAP	Bakta	Bakta	Prokka	Prokka	Prokka	Bakta	EggNOG-Mapper	EggNOG-Mapper	EggNOG-Mapper
GCA_000356065.2	PGAP	Bakta	Bakta	PGAP	Bakta/PGAP/Prokka	Bakta/PGAP/Prokka	PGAP	Bakta	Bakta	Prokka	Prokka	Prokka	Bakta	EggNOG-Mapper	EggNOG-Mapper	EggNOG-Mapper
GCA_000356085.2	PGAP	Bakta	Bakta	PGAP	Bakta	Bakta/PGAP/Prokka	PGAP	Bakta	Bakta	Prokka	Prokka	Prokka	Bakta	EggNOG-Mapper	EggNOG-Mapper	EggNOG-Mapper
GCA_000356105.2	PGAP	Bakta	Bakta	Bakta/PGAP/Prokka	Bakta	Bakta/PGAP/Prokka	PGAP	Bakta	Bakta	Prokka	Prokka	Prokka	Bakta	EggNOG-Mapper	EggNOG-Mapper	EggNOG-Mapper
GCA_000356125.1	PGAP	Bakta	Bakta	PGAP	Bakta	Bakta/PGAP/Prokka	PGAP	Bakta	Bakta	Prokka	Prokka	Prokka	Bakta	EggNOG-Mapper	EggNOG-Mapper	EggNOG-Mapper
GCA_000356145.2	PGAP	Bakta	Bakta	PGAP	Bakta	Bakta/PGAP/Prokka	PGAP	Bakta	Bakta	Prokka	Prokka	Prokka	Bakta	EggNOG-Mapper	EggNOG-Mapper	EggNOG-Mapper
GCA_000356165.2	PGAP	Bakta	Bakta	PGAP	Bakta/PGAP/Prokka	Bakta/PGAP/Prokka	PGAP	Bakta	Bakta	PGAP	Prokka	Prokka	Bakta	EggNOG-Mapper	EggNOG-Mapper	EggNOG-Mapper
GCA_000356185.2	PGAP	Bakta	Bakta	PGAP	Bakta/PGAP/Prokka	Bakta/PGAP/Prokka	PGAP	Bakta	Bakta	Prokka	Prokka	Prokka	Bakta	EggNOG-Mapper	EggNOG-Mapper	EggNOG-Mapper
GCA_000356205.2	PGAP	Bakta	Bakta	PGAP	Bakta	Bakta/PGAP/Prokka	PGAP	Bakta	Bakta	Prokka	Prokka	Prokka	Bakta	EggNOG-Mapper	EggNOG-Mapper	EggNOG-Mapper
GCA_000356225.2	PGAP	Bakta	Bakta	PGAP	Bakta	Bakta/PGAP/Prokka	PGAP	Bakta	Bakta	Prokka	Prokka	Prokka	Bakta	EggNOG-Mapper	EggNOG-Mapper	EggNOG-Mapper
GCA_000356245.1	PGAP	Bakta	Bakta	PGAP	Bakta	Bakta/PGAP/Prokka	PGAP	Bakta	Bakta	Prokka	Prokka	Prokka	Bakta	EggNOG-Mapper	EggNOG-Mapper	EggNOG-Mapper
GCA_000356265.2	PGAP	Bakta	Bakta	PGAP	Bakta	Bakta/PGAP/Prokka	PGAP	PGAP	Bakta	Prokka	Prokka	Prokka	EggNOG-Mapper	EggNOG-Mapper	EggNOG-Mapper	EggNOG-Mapper
GCA_000356285.2	PGAP	Bakta	Bakta	PGAP	Bakta/PGAP/Prokka	Bakta/PGAP/Prokka	PGAP	PGAP	Bakta	Prokka	Prokka	Prokka	Bakta	EggNOG-Mapper	EggNOG-Mapper	EggNOG-Mapper
GCA_000356305.2	PGAP	Bakta	Bakta	PGAP	Bakta	Bakta/PGAP/Prokka	PGAP	PGAP	Bakta	Prokka	Prokka	Prokka	Bakta	EggNOG-Mapper	EggNOG-Mapper	EggNOG-Mapper
GCA_000356325.2	PGAP	Bakta	Bakta	PGAP	Bakta	Bakta/PGAP/Prokka	PGAP	PGAP	Bakta	Prokka	Prokka	Prokka	Bakta	EggNOG-Mapper	EggNOG-Mapper	EggNOG-Mapper
GCA_000356345.2	PGAP	Bakta	Bakta	PGAP	Bakta	Bakta/PGAP/Prokka	PGAP	PGAP	Bakta	Prokka	Prokka	Prokka	Bakta	EggNOG-Mapper	EggNOG-Mapper	EggNOG-Mapper
GCA_000356365.2	PGAP	Bakta	Bakta	PGAP	Bakta	Bakta/PGAP/Prokka	PGAP	PGAP	Bakta	Prokka	Prokka	Prokka	Bakta	EggNOG-Mapper	EggNOG-Mapper	EggNOG-Mapper
GCA_000356385.1	PGAP	Bakta	Bakta	PGAP	Bakta	Bakta/PGAP/Prokka	PGAP	Bakta	Bakta	Prokka	Prokka	Prokka	EggNOG-Mapper	EggNOG-Mapper	EggNOG-Mapper	EggNOG-Mapper
GCA_000356405.2	PGAP	Bakta	Bakta	Bakta/PGAP/Prokka	Bakta	Bakta/PGAP/Prokka	PGAP	Bakta	Bakta	PGAP	Prokka	Prokka	Bakta	EggNOG-Mapper	EggNOG-Mapper	EggNOG-Mapper
GCA_000356425.2	PGAP	Bakta	Bakta	Bakta/PGAP/Prokka	Bakta	Bakta/PGAP/Prokka	PGAP	Bakta	Bakta	Prokka	Prokka	Prokka	Bakta	EggNOG-Mapper	EggNOG-Mapper	EggNOG-Mapper
GCA_000356445.2	PGAP	Bakta	Bakta	PGAP	Bakta/PGAP/Prokka	Bakta/PGAP/Prokka	PGAP	Bakta	Bakta	Prokka	Prokka	Prokka	Bakta	EggNOG-Mapper	EggNOG-Mapper	EggNOG-Mapper
GCA_000356465.2	PGAP	Bakta	Bakta	PGAP	Bakta	Bakta/PGAP/Prokka	PGAP	Bakta	Bakta	PGAP	Prokka	Prokka	Bakta	EggNOG-Mapper	EggNOG-Mapper	EggNOG-Mapper
GCA_000356485.2	PGAP	Bakta	Bakta	PGAP	Bakta	Bakta/PGAP/Prokka	PGAP	Bakta	Bakta	Prokka	Prokka	Prokka	Bakta	EggNOG-Mapper	EggNOG-Mapper	EggNOG-Mapper
GCA_000356505.2	PGAP	Bakta	Bakta	Bakta/PGAP/Prokka	Bakta	Bakta/PGAP/Prokka	PGAP	Bakta	Bakta	Prokka	Prokka	Prokka	Bakta	EggNOG-Mapper	EggNOG-Mapper	EggNOG-Mapper
GCA_000356525.2	PGAP	Bakta	Bakta	PGAP	Bakta/PGAP/Prokka	Bakta/PGAP/Prokka	PGAP	Bakta	Bakta	Prokka	Prokka	Prokka	Bakta	EggNOG-Mapper	EggNOG-Mapper	EggNOG-Mapper
GCA_000356545.1	PGAP	Bakta	Bakta	PGAP	Bakta	Bakta/PGAP/Prokka	PGAP	Bakta	Bakta	PGAP	Prokka	Prokka	Bakta	EggNOG-Mapper	EggNOG-Mapper	EggNOG-Mapper
GCA_000356565.1	PGAP	Bakta	Bakta	PGAP	Bakta	Bakta/PGAP/Prokka	PGAP	Bakta	Bakta	PGAP	Prokka	Prokka	Bakta	EggNOG-Mapper	EggNOG-Mapper	EggNOG-Mapper
GCA_000356585.2	PGAP	Bakta	Bakta	PGAP	Bakta	Bakta/PGAP/Prokka	PGAP	Bakta	Bakta	PGAP	Prokka	Prokka	Bakta	EggNOG-Mapper	EggNOG-Mapper	EggNOG-Mapper
GCA_000356605.2	PGAP	Bakta	Bakta	PGAP	Bakta/PGAP/Prokka	Bakta/PGAP/Prokka	PGAP	Bakta	Bakta	PGAP	Prokka	Prokka	Bakta	EggNOG-Mapper	EggNOG-Mapper	EggNOG-Mapper
GCA_000356625.2	PGAP	Bakta	Bakta	PGAP	Bakta	Bakta/PGAP/Prokka	PGAP	Bakta	Bakta	PGAP	Prokka	Prokka	Bakta	EggNOG-Mapper	EggNOG-Mapper	EggNOG-Mapper
GCA_000356645.2	PGAP	Bakta	Bakta	PGAP	Bakta	Bakta/PGAP/Prokka	PGAP	Bakta	Bakta	PGAP	Prokka	Prokka	Bakta	EggNOG-Mapper	EggNOG-Mapper	EggNOG-Mapper
GCA_000356665.2	PGAP	Bakta	Bakta	PGAP	Bakta/PGAP/Prokka	Bakta/PGAP/Prokka	PGAP	Bakta	Bakta	PGAP	Prokka	Prokka	Bakta	Bakta	EggNOG-Mapper	EggNOG-Mapper
GCA_000356685.2	PGAP	Bakta	Bakta	PGAP	Bakta	Bakta/PGAP/Prokka	PGAP	Bakta	Bakta	Prokka	Prokka	Prokka	Bakta	EggNOG-Mapper	EggNOG-Mapper	EggNOG-Mapper
GCA_000356705.1	PGAP	Bakta	Bakta	PGAP	Bakta	Bakta/PGAP/Prokka	PGAP	Bakta	Bakta	PGAP	Prokka	Prokka	Bakta	EggNOG-Mapper	EggNOG-Mapper	EggNOG-Mapper
GCA_000356725.1	PGAP	Bakta	Bakta	PGAP	Bakta	Bakta/PGAP/Prokka	PGAP	Bakta	Bakta	PGAP	Prokka	Prokka	Bakta	EggNOG-Mapper	EggNOG-Mapper	EggNOG-Mapper
GCA_000356745.2	PGAP	Bakta	Bakta	PGAP	Bakta	Bakta/PGAP/Prokka	PGAP	Bakta	Bakta	PGAP	Prokka	Prokka	Bakta	EggNOG-Mapper	EggNOG-Mapper	EggNOG-Mapper
GCA_000356765.2	PGAP	Bakta	Bakta	PGAP	Bakta	Bakta/PGAP/Prokka	PGAP	PGAP	Bakta	Prokka	Prokka	Prokka	Bakta	EggNOG-Mapper	EggNOG-Mapper	EggNOG-Mapper
GCA_000356785.2	PGAP	Bakta	Bakta	PGAP	Bakta	Bakta/PGAP/Prokka	PGAP	Bakta	Bakta	Prokka	Prokka	Prokka	Bakta	EggNOG-Mapper	EggNOG-Mapper	EggNOG-Mapper
GCA_000356805.2	PGAP	Bakta	Bakta	PGAP	Bakta	Bakta/PGAP/Prokka	PGAP	Bakta	Bakta	Prokka	Prokka	Prokka	Bakta	EggNOG-Mapper	EggNOG-Mapper	EggNOG-Mapper
GCA_000356825.2	PGAP	Bakta	Bakta	PGAP	Bakta	Bakta/PGAP/Prokka	PGAP	Bakta	Bakta	Prokka	Prokka	Prokka	Bakta	EggNOG-Mapper	EggNOG-Mapper	EggNOG-Mapper
GCA_000356845.2	PGAP	Bakta	Bakta	PGAP	Bakta	Bakta/PGAP/Prokka	PGAP	Bakta	Bakta	Prokka	Prokka	Prokka	Bakta	EggNOG-Mapper	EggNOG-Mapper	EggNOG-Mapper
GCA_000356865.2	PGAP	Bakta	Bakta	PGAP	Bakta	Bakta/PGAP/Prokka	PGAP	PGAP	Bakta	Prokka	Prokka	Prokka	EggNOG-Mapper	EggNOG-Mapper	EggNOG-Mapper	EggNOG-Mapper
GCA_000356885.2	PGAP	Bakta	Bakta	PGAP	Bakta	Bakta/PGAP/Prokka	PGAP	Bakta	Bakta	Prokka	Prokka	Prokka	EggNOG-Mapper	EggNOG-Mapper	EggNOG-Mapper	EggNOG-Mapper
GCA_000356905.1	PGAP	Bakta	Bakta	PGAP	Bakta	Bakta/PGAP/Prokka	PGAP	Bakta	Bakta	Prokka	Prokka	Prokka	Bakta	EggNOG-Mapper	EggNOG-Mapper	EggNOG-Mapper
GCA_000356925.2	PGAP	Bakta	Bakta	PGAP	Bakta	Bakta/PGAP/Prokka	PGAP	Bakta	Bakta	Prokka	Prokka	Prokka	EggNOG-Mapper	EggNOG-Mapper	EggNOG-Mapper	EggNOG-Mapper
GCA_000356945.1	PGAP	Bakta	Bakta	PGAP	Bakta	Bakta/PGAP/Prokka	PGAP	Bakta	Bakta	Prokka	Prokka	Prokka	Bakta	EggNOG-Mapper	EggNOG-Mapper	EggNOG-Mapper
GCA_000356965.1	PGAP	Bakta	Bakta	PGAP	Bakta	Bakta/PGAP/Prokka	PGAP	Bakta	Bakta	Prokka	Prokka	Prokka	Bakta	EggNOG-Mapper	EggNOG-Mapper	EggNOG-Mapper
GCA_000356985.2	PGAP	Bakta	Bakta	PGAP	Bakta/PGAP/Prokka	Bakta/PGAP/Prokka	PGAP	Bakta	Bakta	Prokka	Prokka	Prokka	Bakta	EggNOG-Mapper	EggNOG-Mapper	EggNOG-Mapper
GCA_000357005.2	PGAP	Bakta	Bakta	PGAP	Bakta/PGAP/Prokka	Bakta/PGAP/Prokka	PGAP	Bakta	Bakta	Prokka	Prokka	Prokka	Bakta	EggNOG-Mapper	EggNOG-Mapper	EggNOG-Mapper
GCA_000357025.2	PGAP	Bakta	Bakta	PGAP	Bakta	Bakta/PGAP/Prokka	PGAP	Bakta	Bakta	Prokka	Prokka	Prokka	Bakta	EggNOG-Mapper	EggNOG-Mapper	EggNOG-Mapper
GCA_000357045.2	PGAP	Bakta	Bakta	PGAP	Bakta/PGAP/Prokka	Bakta/PGAP/Prokka	PGAP	Bakta	Bakta	Prokka	Prokka	Prokka	Bakta	EggNOG-Mapper	EggNOG-Mapper	EggNOG-Mapper
GCA_000357065.2	PGAP	Bakta	Bakta	PGAP	Bakta/PGAP/Prokka	Bakta/PGAP/Prokka	PGAP	Bakta	Bakta	Prokka	Prokka	Prokka	Bakta	EggNOG-Mapper	EggNOG-Mapper	EggNOG-Mapper
GCA_000357085.1	PGAP	Bakta	Bakta	PGAP	Bakta	Bakta/PGAP/Prokka	PGAP	PGAP	Bakta	Prokka	Prokka	Prokka	Bakta	Bakta	EggNOG-Mapper	EggNOG-Mapper
GCA_000357105.1	PGAP	Bakta	Bakta	PGAP	Bakta	Bakta/PGAP/Prokka	PGAP	Bakta	Bakta	Prokka	Prokka	Prokka	Bakta	EggNOG-Mapper	EggNOG-Mapper	EggNOG-Mapper
GCA_000357125.1	PGAP	Bakta	Bakta	PGAP	Bakta	Bakta/PGAP/Prokka	PGAP	Bakta	Bakta	Prokka	Prokka	Prokka	Bakta	EggNOG-Mapper	EggNOG-Mapper	EggNOG-Mapper
GCA_000357145.2	PGAP	Bakta	Bakta	PGAP	Bakta	Bakta/PGAP/Prokka	PGAP	Bakta	Bakta	Prokka	Prokka	Prokka	Bakta	EggNOG-Mapper	EggNOG-Mapper	EggNOG-Mapper
GCA_000357165.1	PGAP	Bakta	Bakta	PGAP	Bakta	Bakta/PGAP/Prokka	PGAP	Bakta	Bakta	Prokka	Prokka	Prokka	Bakta	Bakta	EggNOG-Mapper	EggNOG-Mapper
GCA_000357185.2	PGAP	Bakta	Bakta	PGAP	Bakta	Bakta/PGAP/Prokka	PGAP	Bakta	Bakta	Prokka	Prokka	Prokka	Bakta	EggNOG-Mapper	EggNOG-Mapper	EggNOG-Mapper
GCA_000357205.2	PGAP	Bakta	Bakta	PGAP	Bakta	Bakta/PGAP/Prokka	PGAP	PGAP	Bakta	Prokka	Prokka	Prokka	Bakta	EggNOG-Mapper	EggNOG-Mapper	EggNOG-Mapper
GCA_000357225.2	PGAP	Bakta	Bakta	PGAP	Bakta/PGAP/Prokka	Bakta/PGAP/Prokka	PGAP	Bakta	Bakta	Prokka	Prokka	Prokka	Bakta	EggNOG-Mapper	EggNOG-Mapper	EggNOG-Mapper
GCA_000357245.1	PGAP	Bakta	Bakta	PGAP	Bakta	Bakta/PGAP/Prokka	PGAP	Bakta	Bakta	Prokka	Prokka	Prokka	Bakta	EggNOG-Mapper	EggNOG-Mapper	EggNOG-Mapper
GCA_000357265.2	PGAP	Bakta	Bakta	PGAP	Bakta/PGAP/Prokka	Bakta/PGAP/Prokka	PGAP	Bakta	Bakta	Prokka	Prokka	Prokka	Bakta	EggNOG-Mapper	EggNOG-Mapper	EggNOG-Mapper
GCA_000357285.2	PGAP	Bakta	Bakta	PGAP	Bakta	Bakta/PGAP/Prokka	PGAP	Bakta	Bakta	Prokka	Prokka	Prokka	Bakta	EggNOG-Mapper	EggNOG-Mapper	EggNOG-Mapper
GCA_000357305.2	PGAP	Bakta	Bakta	PGAP	Bakta	Bakta/PGAP/Prokka	PGAP	Bakta	Bakta	Prokka	Prokka	Prokka	Bakta	EggNOG-Mapper	EggNOG-Mapper	EggNOG-Mapper
GCA_000357325.1	PGAP	Bakta	Bakta	PGAP	Bakta	Bakta/PGAP/Prokka	PGAP	Bakta	Bakta	Prokka	Prokka	Prokka	Bakta	Bakta	EggNOG-Mapper	EggNOG-Mapper
GCA_000357345.2	PGAP	Bakta	Bakta	PGAP	Bakta	Bakta/PGAP/Prokka	PGAP	Bakta	Bakta	Prokka	Prokka	Prokka	Bakta	EggNOG-Mapper	EggNOG-Mapper	EggNOG-Mapper
GCA_000357365.2	PGAP	Bakta	Bakta	PGAP	Bakta	Bakta/PGAP/Prokka	PGAP	Bakta	Bakta	Prokka	Prokka	Prokka	Bakta	EggNOG-Mapper	EggNOG-Mapper	EggNOG-Mapper
GCA_000357385.2	PGAP	Bakta	Bakta	PGAP	Bakta/PGAP/Prokka	Bakta/PGAP/Prokka	PGAP	Bakta	Bakta	Prokka	Prokka	Prokka	Bakta	EggNOG-Mapper	EggNOG-Mapper	EggNOG-Mapper
GCA_000357405.2	PGAP	Bakta	Bakta	PGAP	Bakta/PGAP/Prokka	Bakta/PGAP/Prokka	PGAP	PGAP	Bakta	Prokka	Prokka	Prokka	Bakta	EggNOG-Mapper	EggNOG-Mapper	EggNOG-Mapper
GCA_000357425.2	PGAP	Bakta	Bakta	PGAP	Bakta/PGAP/Prokka	Bakta/PGAP/Prokka	PGAP	Bakta	Bakta	Prokka	Prokka	Prokka	Bakta	EggNOG-Mapper	EggNOG-Mapper	EggNOG-Mapper
GCA_000357445.2	PGAP	Bakta	Bakta	PGAP	Bakta	Bakta/PGAP/Prokka	PGAP	Bakta	Bakta	Prokka	Prokka	Prokka	EggNOG-Mapper	EggNOG-Mapper	EggNOG-Mapper	EggNOG-Mapper
GCA_000357465.2	PGAP	Bakta	Bakta	PGAP	Bakta	Bakta/PGAP/Prokka	PGAP	Bakta	Bakta	Prokka	Prokka	Prokka	Bakta	EggNOG-Mapper	EggNOG-Mapper	EggNOG-Mapper
GCA_000357485.2	PGAP	Bakta	Bakta	PGAP	Bakta/PGAP/Prokka	Bakta/PGAP/Prokka	PGAP	Bakta	Bakta	Prokka	Prokka	Prokka	Bakta	EggNOG-Mapper	EggNOG-Mapper	EggNOG-Mapper
GCA_000357505.2	PGAP	Bakta	Bakta	PGAP	Bakta	Bakta/PGAP/Prokka	PGAP	Bakta	Bakta	Prokka	Prokka	Prokka	Bakta	EggNOG-Mapper	EggNOG-Mapper	EggNOG-Mapper
GCA_000357525.2	PGAP	Bakta	Bakta	PGAP	Bakta	Bakta/PGAP/Prokka	PGAP	Bakta	Bakta	Prokka	Prokka	Prokka	Bakta	EggNOG-Mapper	EggNOG-Mapper	EggNOG-Mapper
GCA_000357545.2	PGAP	Bakta	Bakta	PGAP	Bakta/PGAP/Prokka	Bakta/PGAP/Prokka	PGAP	Bakta	Bakta	Prokka	Prokka	Prokka	Bakta	EggNOG-Mapper	EggNOG-Mapper	EggNOG-Mapper
GCA_000357565.2	PGAP	Bakta	Bakta	PGAP	Bakta/PGAP/Prokka	Bakta/PGAP/Prokka	PGAP	PGAP	Bakta	Prokka	Prokka	Prokka	EggNOG-Mapper	EggNOG-Mapper	EggNOG-Mapper	EggNOG-Mapper
GCA_000357585.2	PGAP	Bakta	Bakta	PGAP	Bakta	Bakta/PGAP/Prokka	PGAP	Bakta	Bakta	PGAP	Prokka	Prokka	Bakta	EggNOG-Mapper	EggNOG-Mapper	EggNOG-Mapper
GCA_000357605.2	PGAP	Bakta	Bakta	PGAP	Bakta	Bakta/PGAP/Prokka	PGAP	Bakta	Bakta	Prokka	Prokka	Prokka	Bakta	EggNOG-Mapper	EggNOG-Mapper	EggNOG-Mapper
GCA_000357625.2	PGAP	Bakta	Bakta	PGAP	Bakta	Bakta/PGAP/Prokka	PGAP	Bakta	Bakta	Prokka	Prokka	Prokka	Bakta	EggNOG-Mapper	EggNOG-Mapper	EggNOG-Mapper
GCA_000357645.1	PGAP	Bakta	Bakta	PGAP	Bakta	Bakta/PGAP/Prokka	PGAP	Bakta	Bakta	Prokka	Prokka	Prokka	Bakta	EggNOG-Mapper	EggNOG-Mapper	EggNOG-Mapper
GCA_000357665.2	PGAP	Bakta	Bakta	PGAP	Bakta	Bakta/PGAP/Prokka	PGAP	Bakta	Bakta	Prokka	Prokka	Prokka	Bakta	EggNOG-Mapper	EggNOG-Mapper	EggNOG-Mapper
GCA_000357685.2	PGAP	Bakta	Bakta	PGAP	Bakta	Bakta/PGAP/Prokka	PGAP	PGAP	Bakta	Prokka	Prokka	Prokka	EggNOG-Mapper	EggNOG-Mapper	EggNOG-Mapper	EggNOG-Mapper
GCA_000357705.2	PGAP	Bakta	Bakta	PGAP	Bakta	Bakta/PGAP/Prokka	PGAP	Bakta	Bakta	Prokka	Prokka	Prokka	Bakta	EggNOG-Mapper	EggNOG-Mapper	EggNOG-Mapper
GCA_000357725.1	PGAP	Bakta	Bakta	PGAP	Bakta/PGAP/Prokka	Bakta/PGAP/Prokka	PGAP	Bakta	Bakta	Prokka	Prokka	Prokka	Bakta	EggNOG-Mapper	EggNOG-Mapper	EggNOG-Mapper
GCA_000357745.1	PGAP	Bakta	Bakta	PGAP	Bakta/PGAP/Prokka	Bakta/PGAP/Prokka	PGAP	PGAP	Bakta	Prokka	Prokka	Prokka	Bakta	EggNOG-Mapper	EggNOG-Mapper	EggNOG-Mapper
GCA_000357765.2	PGAP	Bakta	Bakta	PGAP	Bakta	Bakta/PGAP/Prokka	PGAP	Bakta	Bakta	Prokka	Prokka	Prokka	Bakta	EggNOG-Mapper	EggNOG-Mapper	EggNOG-Mapper
GCA_000357785.2	PGAP	Bakta	Bakta	PGAP	Bakta	Bakta/PGAP/Prokka	PGAP	Bakta	Bakta	Prokka	Prokka	Prokka	Bakta	EggNOG-Mapper	EggNOG-Mapper	EggNOG-Mapper
GCA_000357805.1	PGAP	Bakta	Bakta	PGAP	Bakta	Bakta/PGAP/Prokka	PGAP	PGAP	Bakta	Prokka	Prokka	Prokka	Bakta	Bakta	EggNOG-Mapper	EggNOG-Mapper
GCA_000357825.2	PGAP	Bakta	Bakta	PGAP	Bakta	Bakta/PGAP/Prokka	PGAP	Bakta	Bakta	Prokka	Prokka	Prokka	Bakta	EggNOG-Mapper	EggNOG-Mapper	EggNOG-Mapper
GCA_000357845.2	PGAP	Bakta	Bakta	PGAP	Bakta	Bakta/PGAP/Prokka	PGAP	Bakta	Bakta	Prokka	Prokka	Prokka	Bakta	EggNOG-Mapper	EggNOG-Mapper	EggNOG-Mapper
GCA_000357865.2	PGAP	Bakta	Bakta	PGAP	Bakta	Bakta/PGAP/Prokka	PGAP	Bakta	Bakta	Prokka	Prokka	Prokka	Bakta	EggNOG-Mapper	EggNOG-Mapper	EggNOG-Mapper
GCA_000357885.2	PGAP	Bakta	Bakta	PGAP	Bakta	Bakta/PGAP/Prokka	PGAP	Bakta	Bakta	Prokka	Prokka	Prokka	Bakta	EggNOG-Mapper	EggNOG-Mapper	EggNOG-Mapper
GCA_000357905.2	PGAP	Bakta	Bakta	PGAP	Bakta	Bakta/PGAP/Prokka	PGAP	Bakta	Bakta	Prokka	Prokka	Prokka	Bakta	EggNOG-Mapper	EggNOG-Mapper	EggNOG-Mapper
GCA_000357925.2	PGAP	Bakta	Bakta	PGAP	Bakta	Bakta/PGAP/Prokka	PGAP	Bakta	Bakta	Prokka	Prokka	Prokka	Bakta	EggNOG-Mapper	EggNOG-Mapper	EggNOG-Mapper
GCA_000357945.2	PGAP	Bakta	Bakta	PGAP	Bakta	Bakta/PGAP/Prokka	PGAP	Bakta	Bakta	Prokka	Prokka	Prokka	Bakta	EggNOG-Mapper	EggNOG-Mapper	EggNOG-Mapper
GCA_000357965.2	PGAP	Bakta	Bakta	PGAP	Bakta	Bakta/PGAP/Prokka	PGAP	Bakta	Bakta	Prokka	Prokka	Prokka	Bakta	EggNOG-Mapper	EggNOG-Mapper	EggNOG-Mapper
GCA_000357985.2	PGAP	Bakta	Bakta	PGAP	Bakta	Bakta/PGAP/Prokka	PGAP	Bakta	Bakta	Prokka	Prokka	Prokka	Bakta	EggNOG-Mapper	EggNOG-Mapper	EggNOG-Mapper
GCA_000358005.2	PGAP	Bakta	Bakta	PGAP	Bakta	Bakta/PGAP/Prokka	PGAP	Bakta	Bakta	Prokka	Prokka	Prokka	Bakta	EggNOG-Mapper	EggNOG-Mapper	EggNOG-Mapper
GCA_000358025.2	PGAP	Bakta	Bakta	PGAP	Bakta	Bakta/PGAP/Prokka	PGAP	Bakta	Bakta	Prokka	Prokka	Prokka	Bakta	EggNOG-Mapper	EggNOG-Mapper	EggNOG-Mapper
GCA_000358045.2	PGAP	Bakta	Bakta	PGAP	Bakta	Bakta/PGAP/Prokka	PGAP	Bakta	Bakta	Prokka	Prokka	Prokka	Bakta	EggNOG-Mapper	EggNOG-Mapper	EggNOG-Mapper
GCA_000358065.2	PGAP	Bakta	Bakta	PGAP	Bakta	Bakta/PGAP/Prokka	PGAP	Bakta	Bakta	Prokka	Prokka	Prokka	Bakta	EggNOG-Mapper	EggNOG-Mapper	EggNOG-Mapper
GCA_000358085.2	PGAP	Bakta	Bakta	PGAP	Bakta	Bakta/PGAP/Prokka	PGAP	Bakta	Bakta	Prokka	Prokka	Prokka	Bakta	EggNOG-Mapper	EggNOG-Mapper	EggNOG-Mapper
GCA_000358105.2	PGAP	Bakta	Bakta	PGAP	Bakta	Bakta/PGAP/Prokka	PGAP	Bakta	Bakta	Prokka	Prokka	Prokka	Bakta	EggNOG-Mapper	EggNOG-Mapper	EggNOG-Mapper
GCA_000358125.1	PGAP	Bakta	Bakta	PGAP	Bakta	Bakta/PGAP/Prokka	PGAP	Bakta	Bakta	Prokka	Prokka	Prokka	Bakta	EggNOG-Mapper	EggNOG-Mapper	EggNOG-Mapper
GCA_000358145.2	PGAP	Bakta	Bakta	PGAP	Bakta	Bakta/PGAP/Prokka	PGAP	Bakta	Bakta	Prokka	Prokka	Prokka	Bakta	EggNOG-Mapper	EggNOG-Mapper	EggNOG-Mapper
GCA_000358165.2	PGAP	Bakta	Bakta	PGAP	Bakta	Bakta/PGAP/Prokka	PGAP	Bakta	Bakta	Prokka	Prokka	Prokka	Bakta	EggNOG-Mapper	EggNOG-Mapper	EggNOG-Mapper
GCA_000358185.2	PGAP	Bakta	Bakta	PGAP	Bakta	Bakta/PGAP/Prokka	PGAP	Bakta	Bakta	Prokka	Prokka	Prokka	Bakta	EggNOG-Mapper	EggNOG-Mapper	EggNOG-Mapper
GCA_000358205.2	PGAP	Bakta	Bakta	PGAP	Bakta	Bakta/PGAP/Prokka	PGAP	Bakta	Bakta	Prokka	Prokka	Prokka	Bakta	EggNOG-Mapper	EggNOG-Mapper	EggNOG-Mapper
GCA_000358225.2	PGAP	Bakta	Bakta	PGAP	Bakta	Bakta/PGAP/Prokka	PGAP	Bakta	Bakta	Prokka	Prokka	Prokka	Bakta	EggNOG-Mapper	EggNOG-Mapper	EggNOG-Mapper
GCA_000358245.2	PGAP	Bakta	Bakta	PGAP	Bakta	Bakta/PGAP/Prokka	PGAP	Bakta	Bakta	Prokka	Prokka	Prokka	Bakta	EggNOG-Mapper	EggNOG-Mapper	EggNOG-Mapper
GCA_000358265.2	PGAP	Bakta	Bakta	Bakta/PGAP/Prokka	Bakta	Bakta/PGAP/Prokka	PGAP	Bakta	Bakta	Prokka	Prokka	Prokka	Bakta	EggNOG-Mapper	EggNOG-Mapper	EggNOG-Mapper
GCA_000358285.2	PGAP	Bakta	Bakta	PGAP	Bakta	Bakta/PGAP/Prokka	PGAP	Bakta	Bakta	Prokka	Prokka	Prokka	Bakta	EggNOG-Mapper	EggNOG-Mapper	EggNOG-Mapper
GCA_000358315.1	PGAP	Bakta	Bakta	PGAP	Bakta	Bakta/PGAP/Prokka	PGAP	Bakta	Bakta	Prokka	Prokka	Prokka	Bakta	EggNOG-Mapper	EggNOG-Mapper	EggNOG-Mapper
GCA_000358335.2	PGAP	Bakta	Bakta	PGAP	Bakta	Bakta/PGAP/Prokka	PGAP	PGAP	Bakta	Prokka	Prokka	Prokka	EggNOG-Mapper	EggNOG-Mapper	EggNOG-Mapper	EggNOG-Mapper
GCA_000358355.2	PGAP	Bakta	Bakta	PGAP	Bakta	Bakta/PGAP/Prokka	PGAP	Bakta	Bakta	Prokka	Prokka	Prokka	Bakta	EggNOG-Mapper	EggNOG-Mapper	EggNOG-Mapper
GCA_000358375.1	PGAP	Bakta	Bakta	PGAP	Bakta	Bakta/PGAP/Prokka	PGAP	Bakta	Bakta	Prokka	Prokka	Prokka	Bakta	EggNOG-Mapper	EggNOG-Mapper	EggNOG-Mapper
GCA_000358395.2	PGAP	Bakta	Bakta	PGAP	Bakta	Bakta/PGAP/Prokka	PGAP	PGAP	Bakta	Prokka	Prokka	Prokka	Bakta	EggNOG-Mapper	EggNOG-Mapper	EggNOG-Mapper
GCA_000358415.2	PGAP	Bakta	Bakta	PGAP	Bakta	Bakta/PGAP/Prokka	PGAP	Bakta	Bakta	Prokka	Prokka	Prokka	Bakta	EggNOG-Mapper	EggNOG-Mapper	EggNOG-Mapper
GCA_000358435.2	PGAP	Bakta	Bakta	PGAP	Bakta	Bakta/PGAP/Prokka	PGAP	Bakta	Bakta	Prokka	Prokka	Prokka	Bakta	EggNOG-Mapper	EggNOG-Mapper	EggNOG-Mapper
GCA_000358455.2	PGAP	Bakta	Bakta	PGAP	Bakta	Bakta/PGAP/Prokka	PGAP	Bakta	Bakta	Prokka	Prokka	Prokka	Bakta	EggNOG-Mapper	EggNOG-Mapper	EggNOG-Mapper
GCA_000358475.1	PGAP	Bakta	Bakta	PGAP	Bakta	Bakta/PGAP/Prokka	PGAP	Bakta	Bakta	Prokka	Prokka	Prokka	Bakta	EggNOG-Mapper	EggNOG-Mapper	EggNOG-Mapper
GCA_000358495.2	PGAP	Bakta	Bakta	PGAP	Bakta	Bakta/PGAP/Prokka	PGAP	Bakta	Bakta	Prokka	Prokka	Prokka	Bakta	EggNOG-Mapper	EggNOG-Mapper	EggNOG-Mapper
GCA_000358515.2	PGAP	Bakta	Bakta	PGAP	Bakta	Bakta/PGAP/Prokka	PGAP	Bakta	Bakta	Prokka	Prokka	Prokka	Bakta	EggNOG-Mapper	EggNOG-Mapper	EggNOG-Mapper
GCA_000358535.2	PGAP	Bakta	Bakta	PGAP	Bakta	Bakta/PGAP/Prokka	PGAP	Bakta	Bakta	Prokka	Prokka	Prokka	Bakta	EggNOG-Mapper	EggNOG-Mapper	EggNOG-Mapper
GCA_000358555.1	PGAP	Bakta	Bakta	PGAP	Bakta/PGAP/Prokka	Bakta/PGAP/Prokka	PGAP	Bakta	Bakta	Prokka	Prokka	Prokka	Bakta	EggNOG-Mapper	EggNOG-Mapper	EggNOG-Mapper
GCA_000358575.2	PGAP	Bakta	Bakta	PGAP	Bakta	Bakta/PGAP/Prokka	PGAP	PGAP	Bakta	Prokka	Prokka	Prokka	Bakta	EggNOG-Mapper	EggNOG-Mapper	EggNOG-Mapper
GCA_000358595.2	PGAP	Bakta	Bakta	PGAP	Bakta/PGAP/Prokka	Bakta/PGAP/Prokka	PGAP	Bakta	Bakta	Prokka	Prokka	Prokka	Bakta	EggNOG-Mapper	EggNOG-Mapper	EggNOG-Mapper
GCA_000358615.2	PGAP	Bakta	Bakta	PGAP	Bakta/PGAP/Prokka	Bakta/PGAP/Prokka	PGAP	Bakta	Bakta	Prokka	Prokka	Prokka	Bakta	EggNOG-Mapper	EggNOG-Mapper	EggNOG-Mapper
GCA_000358635.2	PGAP	Bakta	Bakta	PGAP	Bakta/PGAP/Prokka	Bakta/PGAP/Prokka	PGAP	Bakta	Bakta	Prokka	Prokka	Prokka	Bakta	EggNOG-Mapper	EggNOG-Mapper	EggNOG-Mapper
GCA_000358655.2	PGAP	Bakta	Bakta	PGAP	Bakta/PGAP/Prokka	Bakta/PGAP/Prokka	PGAP	Bakta	Bakta	Prokka	Prokka	Prokka	Bakta	EggNOG-Mapper	EggNOG-Mapper	EggNOG-Mapper
GCA_000358675.2	PGAP	Bakta	Bakta	PGAP	Bakta/PGAP/Prokka	Bakta/PGAP/Prokka	PGAP	PGAP	Bakta	Prokka	Prokka	Prokka	Bakta	EggNOG-Mapper	EggNOG-Mapper	EggNOG-Mapper
GCA_000358695.2	PGAP	Bakta	Bakta	PGAP	Bakta/PGAP/Prokka	Bakta/PGAP/Prokka	PGAP	Bakta	Bakta	Prokka	Prokka	Prokka	Bakta	EggNOG-Mapper	EggNOG-Mapper	EggNOG-Mapper
GCA_000358715.2	PGAP	Bakta	Bakta	Bakta/PGAP/Prokka	Bakta	Bakta/PGAP/Prokka	PGAP	Bakta	Bakta	Prokka	Prokka	Prokka	Bakta	EggNOG-Mapper	EggNOG-Mapper	EggNOG-Mapper
GCA_000358735.1	PGAP	Bakta	Bakta	PGAP	Bakta	Bakta/PGAP/Prokka	PGAP	Bakta	Bakta	Prokka	Prokka	Prokka	Bakta	EggNOG-Mapper	EggNOG-Mapper	EggNOG-Mapper
GCA_000358755.2	PGAP	Bakta	Bakta	PGAP	Bakta	Bakta/PGAP/Prokka	PGAP	PGAP	Bakta	Prokka	Prokka	Prokka	Bakta	Bakta	EggNOG-Mapper	EggNOG-Mapper
GCA_000358775.2	PGAP	Bakta	Bakta	PGAP	Bakta	Bakta/PGAP/Prokka	PGAP	Bakta	Bakta	Prokka	Prokka	Prokka	Bakta	EggNOG-Mapper	EggNOG-Mapper	EggNOG-Mapper
GCA_000358795.2	PGAP	Bakta	Bakta	PGAP	Bakta	Bakta/PGAP/Prokka	PGAP	Bakta	Bakta	Prokka	Prokka	Prokka	Bakta	EggNOG-Mapper	EggNOG-Mapper	EggNOG-Mapper
GCA_000358815.1	PGAP	Bakta	Bakta	PGAP	Bakta/PGAP/Prokka	Bakta/PGAP/Prokka	PGAP	Bakta	Bakta	Prokka	Prokka	Prokka	Bakta	EggNOG-Mapper	EggNOG-Mapper	EggNOG-Mapper
GCA_000358835.2	PGAP	Bakta	Bakta	PGAP	Bakta	Bakta/PGAP/Prokka	PGAP	Bakta	Bakta	Prokka	Prokka	Prokka	Bakta	EggNOG-Mapper	EggNOG-Mapper	EggNOG-Mapper
GCA_000358855.2	PGAP	Bakta	Bakta	PGAP	Bakta	Bakta/PGAP/Prokka	PGAP	Bakta	Bakta	Prokka	Prokka	Prokka	Bakta	EggNOG-Mapper	EggNOG-Mapper	EggNOG-Mapper
GCA_000358875.1	PGAP	Bakta	Bakta	PGAP	Bakta	Bakta/PGAP/Prokka	PGAP	Bakta	Bakta	Prokka	Prokka	Prokka	Bakta	EggNOG-Mapper	EggNOG-Mapper	EggNOG-Mapper
GCA_000358895.1	PGAP	Bakta	Bakta	PGAP	Bakta/PGAP/Prokka	Bakta/PGAP/Prokka	PGAP	PGAP	Bakta	Prokka	Prokka	Prokka	Bakta	EggNOG-Mapper	EggNOG-Mapper	EggNOG-Mapper
GCA_000358915.1	PGAP	Bakta	Bakta	PGAP	Bakta/PGAP/Prokka	Bakta/PGAP/Prokka	PGAP	Bakta	Bakta	Prokka	Prokka	Prokka	Bakta	EggNOG-Mapper	EggNOG-Mapper	EggNOG-Mapper
GCA_000358935.2	PGAP	Bakta	Bakta	PGAP	Bakta	Bakta/PGAP/Prokka	PGAP	Bakta	Bakta	Prokka	Prokka	Prokka	Bakta	EggNOG-Mapper	EggNOG-Mapper	EggNOG-Mapper
GCA_000358955.2	PGAP	Bakta	Bakta	PGAP	Bakta	Bakta/PGAP/Prokka	PGAP	Bakta	Bakta	Prokka	Prokka	Prokka	Bakta	EggNOG-Mapper	EggNOG-Mapper	EggNOG-Mapper
GCA_000358975.2	PGAP	Bakta	Bakta	PGAP	Bakta	Bakta/PGAP/Prokka	PGAP	PGAP	Bakta	Prokka	Prokka	Prokka	Bakta	EggNOG-Mapper	EggNOG-Mapper	EggNOG-Mapper
GCA_000358995.1	PGAP	Bakta	Bakta	PGAP	Bakta	Bakta/PGAP/Prokka	PGAP	Bakta	Bakta	Prokka	Prokka	Prokka	Bakta	EggNOG-Mapper	EggNOG-Mapper	EggNOG-Mapper
GCA_000359015.2	PGAP	Bakta	Bakta	PGAP	Bakta	Bakta/PGAP/Prokka	PGAP	Bakta	Bakta	Prokka	Prokka	Prokka	Bakta	EggNOG-Mapper	EggNOG-Mapper	EggNOG-Mapper
GCA_000359035.2	PGAP	Bakta	Bakta	PGAP	Bakta	Bakta/PGAP/Prokka	PGAP	Bakta	Bakta	Prokka	Prokka	Prokka	Bakta	EggNOG-Mapper	EggNOG-Mapper	EggNOG-Mapper
GCA_000359055.2	PGAP	Bakta	Bakta	PGAP	Bakta	Bakta/PGAP/Prokka	PGAP	Bakta	Bakta	Prokka	Prokka	Prokka	Bakta	EggNOG-Mapper	EggNOG-Mapper	EggNOG-Mapper
GCA_000359075.1	PGAP	Bakta	Bakta	PGAP	Bakta/PGAP/Prokka	Bakta/PGAP/Prokka	PGAP	PGAP	Bakta	Prokka	Prokka	Prokka	Bakta	Bakta	EggNOG-Mapper	EggNOG-Mapper
GCA_000359095.2	PGAP	Bakta	Bakta	PGAP	Bakta	Bakta/PGAP/Prokka	PGAP	Bakta	Bakta	Prokka	Prokka	Prokka	Bakta	EggNOG-Mapper	EggNOG-Mapper	EggNOG-Mapper
GCA_000364305.1	PGAP	Bakta	Bakta	Bakta/PGAP/Prokka	Bakta	Bakta/PGAP/Prokka	PGAP	Bakta	Bakta	EggNOG-Mapper	Prokka	Prokka	Bakta	EggNOG-Mapper	EggNOG-Mapper	EggNOG-Mapper
GCA_000364365.1	PGAP	Bakta	Bakta	Bakta/PGAP/Prokka	Bakta	Bakta/PGAP/Prokka	PGAP	Bakta	Bakta	Prokka	Prokka	Prokka	Bakta	Bakta	EggNOG-Mapper	EggNOG-Mapper
GCA_000387785.2	PGAP	Bakta	Bakta	PGAP	Bakta	Bakta/PGAP/Prokka	PGAP	Bakta	Bakta	PGAP	Prokka	Prokka	Bakta	EggNOG-Mapper	EggNOG-Mapper	EggNOG-Mapper
GCA_000387805.2	PGAP	Bakta	Bakta	PGAP	Bakta	Bakta	PGAP	Bakta	Bakta	Prokka	Prokka	Prokka	Bakta	EggNOG-Mapper	EggNOG-Mapper	EggNOG-Mapper
GCA_000387825.2	PGAP	Bakta	Bakta	PGAP	Bakta	Bakta/PGAP/Prokka	PGAP	Bakta	Bakta	PGAP	Prokka	Prokka	Bakta	EggNOG-Mapper	EggNOG-Mapper	EggNOG-Mapper
GCA_000387845.2	PGAP	Bakta	Bakta	PGAP	Bakta/PGAP/Prokka	Bakta/PGAP/Prokka	PGAP	Bakta	Bakta	EggNOG-Mapper	Prokka	Prokka	Bakta	EggNOG-Mapper	EggNOG-Mapper	EggNOG-Mapper
GCA_000387865.2	PGAP	Bakta	Bakta	PGAP	Bakta	Bakta/PGAP/Prokka	PGAP	Bakta	Bakta	Prokka	Prokka	Prokka	Bakta	EggNOG-Mapper	EggNOG-Mapper	EggNOG-Mapper
GCA_000392555.1	PGAP	Bakta	Bakta	PGAP	Bakta	Bakta/PGAP/Prokka	PGAP	PGAP	Bakta	Prokka	Prokka	Prokka	Bakta	Bakta	EggNOG-Mapper	EggNOG-Mapper
GCA_000392575.1	PGAP	Bakta	Bakta	Bakta/PGAP/Prokka	Bakta	Bakta/PGAP/Prokka	PGAP	Bakta	Bakta	Prokka	Prokka	Prokka	Bakta	Bakta	EggNOG-Mapper	EggNOG-Mapper
GCA_000397225.1	PGAP	Bakta	Bakta	PGAP	Bakta	Bakta/PGAP/Prokka	PGAP	Bakta	Bakta	PGAP	Prokka	Prokka	EggNOG-Mapper	EggNOG-Mapper	EggNOG-Mapper	EggNOG-Mapper
GCA_000397245.1	PGAP	Bakta	Bakta	PGAP	Bakta/PGAP/Prokka	Bakta/PGAP/Prokka	PGAP	Bakta	Bakta	PGAP	Prokka	Prokka	EggNOG-Mapper	EggNOG-Mapper	EggNOG-Mapper	EggNOG-Mapper
GCA_000397265.1	PGAP	Bakta	Bakta	PGAP	Bakta/PGAP/Prokka	Bakta/PGAP/Prokka	PGAP	Bakta	Bakta	PGAP	Prokka	Prokka	EggNOG-Mapper	EggNOG-Mapper	EggNOG-Mapper	EggNOG-Mapper
GCA_000397285.1	PGAP	Bakta	Bakta	PGAP	Bakta/PGAP/Prokka	Bakta/PGAP/Prokka	PGAP	Bakta	Bakta	Prokka	Prokka	Prokka	EggNOG-Mapper	EggNOG-Mapper	EggNOG-Mapper	EggNOG-Mapper
GCA_000397305.1	PGAP	Bakta	Bakta	Prokka	Bakta	Bakta/PGAP/Prokka	PGAP	Bakta	Bakta	PGAP	Prokka	Prokka	EggNOG-Mapper	EggNOG-Mapper	EggNOG-Mapper	EggNOG-Mapper
GCA_000397325.1	PGAP	Bakta	Bakta	PGAP	Bakta	Bakta/PGAP/Prokka	PGAP	PGAP	Bakta	PGAP	Prokka	Prokka	EggNOG-Mapper	EggNOG-Mapper	EggNOG-Mapper	EggNOG-Mapper
GCA_000397385.1	PGAP	Bakta	Bakta	Prokka	Bakta	Bakta/PGAP/Prokka	PGAP	PGAP	PGAP	PGAP	PGAP	Prokka	EggNOG-Mapper	EggNOG-Mapper	EggNOG-Mapper	EggNOG-Mapper
GCA_000397405.1	PGAP	Bakta	Bakta	Prokka	Bakta/PGAP/Prokka	Bakta/PGAP/Prokka	PGAP	PGAP	Bakta	PGAP	Prokka	Prokka	EggNOG-Mapper	EggNOG-Mapper	EggNOG-Mapper	EggNOG-Mapper
GCA_000397445.1	PGAP	Bakta	Bakta	PGAP	Bakta/PGAP/Prokka	Bakta/PGAP/Prokka	PGAP	Bakta	Bakta	PGAP	Prokka	Prokka	EggNOG-Mapper	EggNOG-Mapper	EggNOG-Mapper	EggNOG-Mapper
GCA_000397465.1	PGAP	Bakta	Bakta	PGAP	Bakta/PGAP/Prokka	Bakta/PGAP/Prokka	PGAP	Bakta	Bakta	PGAP	Prokka	Prokka	EggNOG-Mapper	EggNOG-Mapper	EggNOG-Mapper	EggNOG-Mapper
GCA_000397485.1	PGAP	Bakta	Bakta	PGAP	Bakta/PGAP/Prokka	Bakta/PGAP/Prokka	PGAP	Bakta	Bakta	PGAP	Prokka	Prokka	EggNOG-Mapper	EggNOG-Mapper	EggNOG-Mapper	EggNOG-Mapper
GCA_000397505.1	PGAP	Bakta	Bakta	PGAP	Bakta/PGAP/Prokka	Bakta/PGAP/Prokka	PGAP	Bakta	Bakta	Prokka	Prokka	Prokka	EggNOG-Mapper	EggNOG-Mapper	EggNOG-Mapper	EggNOG-Mapper
GCA_000397525.1	PGAP	Bakta	Bakta	PGAP	Bakta/PGAP/Prokka	Bakta/PGAP/Prokka	PGAP	Bakta	Bakta	Prokka	Prokka	Prokka	Bakta	EggNOG-Mapper	EggNOG-Mapper	EggNOG-Mapper
GCA_000397545.1	PGAP	Bakta	Bakta	PGAP	Bakta/PGAP/Prokka	Bakta/PGAP/Prokka	PGAP	Bakta	Bakta	Prokka	Prokka	Prokka	EggNOG-Mapper	EggNOG-Mapper	EggNOG-Mapper	EggNOG-Mapper
GCA_000397565.1	PGAP	Bakta	Bakta	PGAP	Bakta/PGAP/Prokka	Bakta/PGAP/Prokka	PGAP	PGAP	Bakta	Prokka	Prokka	Prokka	EggNOG-Mapper	EggNOG-Mapper	EggNOG-Mapper	EggNOG-Mapper
GCA_000397605.1	PGAP	Bakta	Bakta	Bakta/PGAP/Prokka	Bakta	Bakta/PGAP/Prokka	PGAP	PGAP	Bakta	Prokka	Prokka	Prokka	Bakta	EggNOG-Mapper	EggNOG-Mapper	EggNOG-Mapper
GCA_000397625.1	PGAP	Bakta	Bakta	PGAP	Bakta/PGAP/Prokka	Bakta/PGAP/Prokka	PGAP	Bakta	Bakta	Prokka	Prokka	Prokka	EggNOG-Mapper	EggNOG-Mapper	EggNOG-Mapper	EggNOG-Mapper
GCA_000397645.1	PGAP	Bakta	Bakta	PGAP	Bakta/PGAP/Prokka	Bakta/PGAP/Prokka	PGAP	Bakta	Bakta	Prokka	Prokka	Prokka	EggNOG-Mapper	EggNOG-Mapper	EggNOG-Mapper	EggNOG-Mapper
GCA_000397665.1	PGAP	Bakta	Bakta	PGAP	Bakta	Bakta/PGAP/Prokka	PGAP	Bakta	Bakta	Prokka	Prokka	Prokka	EggNOG-Mapper	EggNOG-Mapper	EggNOG-Mapper	EggNOG-Mapper
GCA_000397685.1	PGAP	Bakta	Bakta	PGAP	Bakta/PGAP/Prokka	Bakta/PGAP/Prokka	PGAP	Bakta	Bakta	Prokka	Prokka	Prokka	EggNOG-Mapper	EggNOG-Mapper	EggNOG-Mapper	EggNOG-Mapper
GCA_000397705.1	PGAP	Bakta	Bakta	PGAP	Bakta/PGAP/Prokka	Bakta/PGAP/Prokka	PGAP	Bakta	Bakta	Prokka	Prokka	Prokka	EggNOG-Mapper	EggNOG-Mapper	EggNOG-Mapper	EggNOG-Mapper
GCA_000397725.1	PGAP	Bakta	Bakta	PGAP	Bakta	Bakta/PGAP/Prokka	PGAP	Bakta	Bakta	Prokka	Prokka	Prokka	Bakta	EggNOG-Mapper	EggNOG-Mapper	EggNOG-Mapper
GCA_000397745.1	PGAP	Bakta	Bakta	PGAP	Bakta	Bakta/PGAP/Prokka	PGAP	Bakta	Bakta	Prokka	Prokka	Prokka	Bakta	EggNOG-Mapper	EggNOG-Mapper	EggNOG-Mapper
GCA_000398885.1	PGAP	Bakta	Bakta	Bakta/PGAP/Prokka	Bakta	Bakta/PGAP/Prokka	PGAP	Bakta	Bakta	EggNOG-Mapper	Prokka	Prokka	EggNOG-Mapper	EggNOG-Mapper	EggNOG-Mapper	EggNOG-Mapper
GCA_000400895.2	PGAP	Bakta	Bakta	PGAP	Bakta	Bakta/PGAP/Prokka	PGAP	Bakta	Bakta	Prokka	Prokka	EggNOG-Mapper	Bakta	EggNOG-Mapper	EggNOG-Mapper	EggNOG-Mapper
GCA_000401755.1	PGAP	Bakta	Bakta	Bakta/PGAP/Prokka	Bakta	Bakta/PGAP/Prokka	PGAP	Bakta	Bakta	Prokka	Prokka	Prokka	Bakta	EggNOG-Mapper	EggNOG-Mapper	EggNOG-Mapper
GCA_000403965.1	PGAP	Bakta	Bakta	Bakta/PGAP/Prokka	Bakta	Bakta/PGAP/Prokka	PGAP	PGAP	Bakta	Prokka	Prokka	Prokka	Bakta	Bakta	EggNOG-Mapper	EggNOG-Mapper
GCA_000403985.1	PGAP	Bakta	Bakta	Bakta/PGAP/Prokka	Bakta	Bakta/PGAP/Prokka	PGAP	PGAP	Bakta	Prokka	Prokka	Prokka	EggNOG-Mapper	EggNOG-Mapper	EggNOG-Mapper	EggNOG-Mapper
GCA_000407665.1	PGAP	Bakta	Bakta	Prokka	Bakta	Bakta/PGAP/Prokka	PGAP	Bakta	Bakta	EggNOG-Mapper	Prokka	Prokka	Bakta	EggNOG-Mapper	EggNOG-Mapper	EggNOG-Mapper
GCA_000407685.1	PGAP	Bakta	Bakta	Prokka	Bakta/PGAP/Prokka	Bakta/PGAP/Prokka	PGAP	Bakta	Bakta	EggNOG-Mapper	Prokka	Prokka	Bakta	EggNOG-Mapper	EggNOG-Mapper	EggNOG-Mapper
GCA_000407705.1	PGAP	Bakta	Bakta	Prokka	Bakta	Bakta/PGAP/Prokka	PGAP	Bakta	Bakta	EggNOG-Mapper	Prokka	Prokka	Bakta	EggNOG-Mapper	EggNOG-Mapper	EggNOG-Mapper
GCA_000407725.1	PGAP	Bakta	Bakta	Prokka	Bakta	Bakta/PGAP/Prokka	PGAP	Bakta	Bakta	EggNOG-Mapper	Prokka	Prokka	Bakta	EggNOG-Mapper	EggNOG-Mapper	EggNOG-Mapper
GCA_000407745.1	PGAP	Bakta	Bakta	PGAP	Bakta/PGAP/Prokka	Bakta/PGAP/Prokka	PGAP	Bakta	Bakta	EggNOG-Mapper	Prokka	Prokka	Bakta	EggNOG-Mapper	EggNOG-Mapper	EggNOG-Mapper
GCA_000407785.1	PGAP	Bakta	Bakta	PGAP	Bakta	Bakta/PGAP/Prokka	PGAP	Bakta	Bakta	EggNOG-Mapper	Prokka	Prokka	Bakta	EggNOG-Mapper	EggNOG-Mapper	EggNOG-Mapper
GCA_000407805.1	PGAP	Bakta	Bakta	Prokka	Bakta	Bakta/PGAP/Prokka	PGAP	Bakta	Bakta	EggNOG-Mapper	Prokka	Prokka	Bakta	EggNOG-Mapper	EggNOG-Mapper	EggNOG-Mapper
GCA_000407825.1	PGAP	Bakta	Bakta	Prokka	Bakta/PGAP/Prokka	Bakta/PGAP/Prokka	PGAP	Bakta	Bakta	EggNOG-Mapper	Prokka	Prokka	Bakta	EggNOG-Mapper	EggNOG-Mapper	EggNOG-Mapper
GCA_000407845.1	PGAP	Bakta	Bakta	Bakta/Prokka	Bakta	Bakta/PGAP/Prokka	PGAP	Bakta	Bakta	EggNOG-Mapper	Prokka	Prokka	Bakta	EggNOG-Mapper	EggNOG-Mapper	EggNOG-Mapper
GCA_000407865.1	PGAP	Bakta	Bakta	Bakta/PGAP/Prokka	Bakta/PGAP/Prokka	Bakta/PGAP/Prokka	PGAP	Bakta	Bakta	EggNOG-Mapper	Prokka	Prokka	Bakta	EggNOG-Mapper	EggNOG-Mapper	EggNOG-Mapper
GCA_000407885.1	PGAP	Bakta	Bakta	Prokka	Bakta	Bakta/PGAP/Prokka	PGAP	Bakta	Bakta	EggNOG-Mapper	Prokka	Prokka	Bakta	EggNOG-Mapper	EggNOG-Mapper	EggNOG-Mapper
GCA_000407945.1	PGAP	Bakta	Bakta	PGAP	Bakta/PGAP/Prokka	Bakta/PGAP/Prokka	PGAP	Bakta	Bakta	EggNOG-Mapper	Prokka	Prokka	Bakta	EggNOG-Mapper	EggNOG-Mapper	EggNOG-Mapper
GCA_000407965.1	PGAP	Bakta	Bakta	Prokka	Bakta	Bakta/PGAP/Prokka	PGAP	Bakta	Bakta	EggNOG-Mapper	Prokka	Prokka	Bakta	EggNOG-Mapper	EggNOG-Mapper	EggNOG-Mapper
GCA_000407985.1	PGAP	Bakta	Bakta	PGAP/Prokka	Bakta	Bakta/PGAP/Prokka	PGAP	Bakta	Bakta	EggNOG-Mapper	Prokka	Prokka	Bakta	EggNOG-Mapper	EggNOG-Mapper	EggNOG-Mapper
GCA_000408005.1	PGAP	Bakta	Bakta	PGAP	Bakta	Bakta/PGAP/Prokka	PGAP	Bakta	Bakta	EggNOG-Mapper	Prokka	Prokka	Bakta	EggNOG-Mapper	EggNOG-Mapper	EggNOG-Mapper
GCA_000408025.1	PGAP	Bakta	Bakta	Prokka	Bakta	Bakta/PGAP/Prokka	PGAP	Bakta	Bakta	EggNOG-Mapper	Prokka	Prokka	Bakta	EggNOG-Mapper	EggNOG-Mapper	EggNOG-Mapper
GCA_000408045.1	PGAP	Bakta	Bakta	Bakta/Prokka	Bakta	Bakta/PGAP/Prokka	PGAP	Bakta	Bakta	EggNOG-Mapper	Prokka	Prokka	Bakta	EggNOG-Mapper	EggNOG-Mapper	EggNOG-Mapper
GCA_000408065.1	PGAP	Bakta	Bakta	PGAP	Bakta	Bakta/PGAP/Prokka	PGAP	Bakta	Bakta	EggNOG-Mapper	Prokka	Prokka	Bakta	EggNOG-Mapper	EggNOG-Mapper	EggNOG-Mapper
GCA_000408085.1	PGAP	Bakta	Bakta	Bakta/PGAP/Prokka	Bakta/PGAP/Prokka	Bakta/PGAP/Prokka	PGAP	Bakta	Bakta	EggNOG-Mapper	Prokka	Prokka	Bakta	EggNOG-Mapper	EggNOG-Mapper	EggNOG-Mapper
GCA_000408105.1	PGAP	Bakta	Bakta	Prokka	Bakta	Bakta/PGAP/Prokka	PGAP	Bakta	Bakta	EggNOG-Mapper	Prokka	Prokka	EggNOG-Mapper	EggNOG-Mapper	EggNOG-Mapper	EggNOG-Mapper
GCA_000408125.1	PGAP	Bakta	Bakta	Prokka	Bakta/PGAP/Prokka	Bakta/PGAP/Prokka	PGAP	Bakta	Bakta	EggNOG-Mapper	Prokka	Prokka	Bakta	EggNOG-Mapper	EggNOG-Mapper	EggNOG-Mapper
GCA_000408145.1	PGAP	Bakta	Bakta	Prokka	Bakta/PGAP/Prokka	Bakta/PGAP/Prokka	PGAP	Bakta	Bakta	EggNOG-Mapper	Prokka	Prokka	Bakta	EggNOG-Mapper	EggNOG-Mapper	EggNOG-Mapper
GCA_000408165.1	PGAP	Bakta	Bakta	Prokka	Bakta/PGAP/Prokka	Bakta/PGAP/Prokka	PGAP	Bakta	Bakta	EggNOG-Mapper	Prokka	Prokka	Bakta	EggNOG-Mapper	EggNOG-Mapper	EggNOG-Mapper
GCA_000408185.1	PGAP	Bakta	Bakta	Prokka	Bakta	Bakta/PGAP/Prokka	PGAP	Bakta	Bakta	EggNOG-Mapper	Prokka	Prokka	Bakta	EggNOG-Mapper	EggNOG-Mapper	EggNOG-Mapper
GCA_000408205.1	PGAP	Bakta	Bakta	Prokka	Bakta/PGAP/Prokka	Bakta/PGAP/Prokka	PGAP	Bakta	Bakta	EggNOG-Mapper	Prokka	Prokka	Bakta	EggNOG-Mapper	EggNOG-Mapper	EggNOG-Mapper
GCA_000408225.1	PGAP	Bakta	Bakta	PGAP	Bakta	Bakta/PGAP/Prokka	PGAP	Bakta	Bakta	EggNOG-Mapper	Prokka	Prokka	Bakta	EggNOG-Mapper	EggNOG-Mapper	EggNOG-Mapper
GCA_000408245.1	PGAP	Bakta	Bakta	Prokka	Bakta	Bakta/PGAP/Prokka	PGAP	Bakta	Bakta	EggNOG-Mapper	Prokka	Prokka	Bakta	EggNOG-Mapper	EggNOG-Mapper	EggNOG-Mapper
GCA_000408265.1	PGAP	Bakta	Bakta	Prokka	Bakta	Bakta/PGAP/Prokka	PGAP	Bakta	Bakta	EggNOG-Mapper	Prokka	Prokka	Bakta	EggNOG-Mapper	EggNOG-Mapper	EggNOG-Mapper
GCA_000408285.1	PGAP	Bakta	Bakta	Prokka	Bakta/PGAP/Prokka	Bakta/PGAP/Prokka	PGAP	Bakta	Bakta	EggNOG-Mapper	Prokka	Prokka	Bakta	EggNOG-Mapper	EggNOG-Mapper	EggNOG-Mapper
GCA_000408305.1	PGAP	Bakta	Bakta	Prokka	Bakta	Bakta/PGAP/Prokka	PGAP	Bakta	Bakta	EggNOG-Mapper	Prokka	Prokka	Bakta	EggNOG-Mapper	EggNOG-Mapper	EggNOG-Mapper
GCA_000408345.1	PGAP	Bakta	Bakta	Prokka	Bakta	Bakta/PGAP/Prokka	PGAP	Bakta	Bakta	EggNOG-Mapper	Prokka	Prokka	Bakta	EggNOG-Mapper	EggNOG-Mapper	EggNOG-Mapper
GCA_000408365.1	PGAP	Bakta	Bakta	Prokka	Bakta/PGAP/Prokka	Bakta/PGAP/Prokka	PGAP	Bakta	Bakta	EggNOG-Mapper	Prokka	Prokka	Bakta	EggNOG-Mapper	EggNOG-Mapper	EggNOG-Mapper
GCA_000408385.1	PGAP	Bakta	Bakta	Prokka	Bakta	Bakta/PGAP/Prokka	PGAP	Bakta	Bakta	EggNOG-Mapper	Prokka	Prokka	Bakta	EggNOG-Mapper	EggNOG-Mapper	EggNOG-Mapper
GCA_000408405.1	PGAP	Bakta	Bakta	Prokka	Bakta	Bakta/PGAP/Prokka	PGAP	Bakta	Bakta	EggNOG-Mapper	Prokka	Prokka	EggNOG-Mapper	EggNOG-Mapper	EggNOG-Mapper	EggNOG-Mapper
GCA_000408425.1	PGAP	Bakta	Bakta	Bakta/Prokka	Bakta	Bakta/PGAP/Prokka	PGAP	Bakta	Bakta	EggNOG-Mapper	Prokka	Prokka	EggNOG-Mapper	EggNOG-Mapper	EggNOG-Mapper	EggNOG-Mapper
GCA_000408445.1	PGAP	Bakta	Bakta	PGAP/Prokka	Bakta	Bakta/PGAP/Prokka	PGAP	Bakta	Bakta	EggNOG-Mapper	Prokka	EggNOG-Mapper	Bakta	EggNOG-Mapper	EggNOG-Mapper	EggNOG-Mapper
GCA_000408465.1	PGAP	Bakta	Bakta	Prokka	Bakta	Bakta/PGAP/Prokka	PGAP	Bakta	Bakta	EggNOG-Mapper	Prokka	Prokka	Bakta	EggNOG-Mapper	EggNOG-Mapper	EggNOG-Mapper
GCA_000408485.1	PGAP	Bakta	Bakta	Bakta/Prokka	Bakta	Bakta/PGAP/Prokka	PGAP	Bakta	Bakta	EggNOG-Mapper	Prokka	Prokka	Bakta	EggNOG-Mapper	EggNOG-Mapper	EggNOG-Mapper
GCA_000408505.1	PGAP	Bakta	Bakta	Bakta/Prokka	Bakta	Bakta/PGAP/Prokka	PGAP	Bakta	Bakta	EggNOG-Mapper	Prokka	Prokka	Bakta	EggNOG-Mapper	EggNOG-Mapper	EggNOG-Mapper
GCA_000408545.1	PGAP	Bakta	Bakta	Prokka	Bakta	Bakta/PGAP/Prokka	PGAP	Bakta	Bakta	EggNOG-Mapper	Prokka	Prokka	Bakta	EggNOG-Mapper	EggNOG-Mapper	EggNOG-Mapper
GCA_000408565.1	PGAP	Bakta	Bakta	Bakta/Prokka	Bakta	Bakta/PGAP/Prokka	PGAP	Bakta	Bakta	EggNOG-Mapper	Prokka	Prokka	Bakta	EggNOG-Mapper	EggNOG-Mapper	EggNOG-Mapper
GCA_000408585.1	PGAP	Bakta	Bakta	Bakta/PGAP/Prokka	Bakta	Bakta/PGAP/Prokka	PGAP	Bakta	Bakta	EggNOG-Mapper	Prokka	Prokka	Bakta	EggNOG-Mapper	EggNOG-Mapper	EggNOG-Mapper
GCA_000408605.1	PGAP	Bakta	Bakta	Prokka	Bakta	Bakta/PGAP/Prokka	PGAP	Bakta	Bakta	EggNOG-Mapper	Prokka	Prokka	Bakta	EggNOG-Mapper	EggNOG-Mapper	EggNOG-Mapper
GCA_000408625.1	PGAP	Bakta	Bakta	Prokka	Bakta/PGAP/Prokka	Bakta/PGAP/Prokka	PGAP	Bakta	Bakta	EggNOG-Mapper	Prokka	Prokka	Bakta	EggNOG-Mapper	EggNOG-Mapper	EggNOG-Mapper
GCA_000408645.1	PGAP	Bakta	Bakta	Prokka	Bakta	Bakta/PGAP/Prokka	PGAP	Bakta	Bakta	EggNOG-Mapper	Prokka	Prokka	Bakta	EggNOG-Mapper	EggNOG-Mapper	EggNOG-Mapper
GCA_000408665.1	PGAP	Bakta	Bakta	Prokka	Bakta/PGAP/Prokka	Bakta/PGAP/Prokka	PGAP	Bakta	Bakta	EggNOG-Mapper	Prokka	Prokka	Bakta	EggNOG-Mapper	EggNOG-Mapper	EggNOG-Mapper
GCA_000408685.1	PGAP	Bakta	Bakta	Prokka	Bakta	Bakta/PGAP/Prokka	PGAP	Bakta	Bakta	EggNOG-Mapper	Prokka	Prokka	EggNOG-Mapper	EggNOG-Mapper	EggNOG-Mapper	EggNOG-Mapper
GCA_000408705.1	PGAP	Bakta	Bakta	Bakta/Prokka	Bakta	Bakta/PGAP/Prokka	Bakta	Bakta	Bakta	EggNOG-Mapper	Prokka	Prokka	Bakta	EggNOG-Mapper	EggNOG-Mapper	EggNOG-Mapper
GCA_000408725.1	PGAP	Bakta	Bakta	PGAP	Bakta	Bakta/PGAP/Prokka	PGAP	Bakta	Bakta	EggNOG-Mapper	Prokka	Prokka	Bakta	EggNOG-Mapper	EggNOG-Mapper	EggNOG-Mapper
GCA_000408745.1	PGAP	Bakta	Bakta	PGAP	Bakta	Bakta/PGAP/Prokka	PGAP	Bakta	Bakta	EggNOG-Mapper	Prokka	Prokka	Bakta	EggNOG-Mapper	EggNOG-Mapper	EggNOG-Mapper
GCA_000408765.1	PGAP	Bakta	Bakta	Prokka	Bakta	Bakta/PGAP/Prokka	PGAP	Bakta	Bakta	EggNOG-Mapper	Prokka	Prokka	Bakta	EggNOG-Mapper	EggNOG-Mapper	EggNOG-Mapper
GCA_000408785.1	PGAP	Bakta	Bakta	Bakta/PGAP/Prokka	Bakta/PGAP/Prokka	Bakta/PGAP/Prokka	PGAP	Bakta	Bakta	EggNOG-Mapper	Prokka	Prokka	Bakta	EggNOG-Mapper	EggNOG-Mapper	EggNOG-Mapper
GCA_000408825.1	PGAP	Bakta	Bakta	Prokka	Bakta	Bakta/PGAP/Prokka	Bakta	Bakta	Bakta	EggNOG-Mapper	Prokka	Prokka	Bakta	EggNOG-Mapper	EggNOG-Mapper	EggNOG-Mapper
GCA_000410655.2	PGAP	Bakta	Bakta	Bakta/PGAP/Prokka	Bakta	Bakta/PGAP/Prokka	PGAP	Bakta	Bakta	Prokka	Prokka	Prokka	Bakta	EggNOG-Mapper	EggNOG-Mapper	EggNOG-Mapper
GCA_000410675.2	PGAP	Bakta	Bakta	Bakta/PGAP/Prokka	Bakta	Bakta/PGAP/Prokka	PGAP	Bakta	Bakta	Prokka	Prokka	Prokka	Bakta	EggNOG-Mapper	EggNOG-Mapper	EggNOG-Mapper
GCA_000414155.2	PGAP	Bakta	Bakta	PGAP	Bakta	Bakta/PGAP/Prokka	PGAP	Bakta	Bakta	Prokka	Prokka	Prokka	Bakta	EggNOG-Mapper	EggNOG-Mapper	EggNOG-Mapper
GCA_000415485.1	PGAP	Bakta	Bakta	PGAP	Bakta	Bakta/PGAP/Prokka	PGAP	PGAP	Bakta	Prokka	Prokka	Prokka	Bakta	EggNOG-Mapper	EggNOG-Mapper	EggNOG-Mapper
GCA_000418595.1	PGAP	Bakta	Bakta	PGAP	Bakta	Bakta/PGAP/Prokka	PGAP	Bakta	Bakta	Prokka	Prokka	EggNOG-Mapper	Bakta	EggNOG-Mapper	EggNOG-Mapper	EggNOG-Mapper
GCA_000418615.2	PGAP	Bakta	Bakta	Bakta/PGAP/Prokka	Bakta	Bakta/PGAP/Prokka	PGAP	Bakta	Bakta	Prokka	Prokka	EggNOG-Mapper	Bakta	EggNOG-Mapper	EggNOG-Mapper	EggNOG-Mapper
GCA_000418635.1	PGAP	Bakta	Bakta	PGAP	Bakta	Bakta/PGAP/Prokka	PGAP	Bakta	Bakta	Prokka	Prokka	EggNOG-Mapper	Bakta	EggNOG-Mapper	EggNOG-Mapper	EggNOG-Mapper
GCA_000418655.1	PGAP	Bakta	Bakta	PGAP	Bakta	Bakta/PGAP/Prokka	PGAP	Bakta	Bakta	Prokka	Prokka	EggNOG-Mapper	Bakta	EggNOG-Mapper	EggNOG-Mapper	EggNOG-Mapper
GCA_000418675.1	PGAP	Bakta	Bakta	Bakta/PGAP/Prokka	Bakta	Bakta/PGAP/Prokka	PGAP	Bakta	Bakta	Prokka	Prokka	EggNOG-Mapper	Bakta	EggNOG-Mapper	EggNOG-Mapper	EggNOG-Mapper
GCA_000418695.2	PGAP	Bakta	Bakta	Bakta/PGAP/Prokka	Bakta	Bakta/PGAP/Prokka	PGAP	Bakta	Bakta	Prokka	Prokka	EggNOG-Mapper	Bakta	EggNOG-Mapper	EggNOG-Mapper	EggNOG-Mapper
GCA_000418715.1	PGAP	Bakta	Bakta	PGAP	Bakta	Bakta/PGAP/Prokka	PGAP	Bakta	Bakta	Prokka	Prokka	EggNOG-Mapper	Bakta	EggNOG-Mapper	EggNOG-Mapper	EggNOG-Mapper
GCA_000418735.2	PGAP	Bakta	Bakta	PGAP	Bakta	Bakta/PGAP/Prokka	PGAP	Bakta	Bakta	Prokka	Prokka	EggNOG-Mapper	Bakta	EggNOG-Mapper	EggNOG-Mapper	EggNOG-Mapper
GCA_000418755.2	PGAP	Bakta	Bakta	PGAP	Bakta	Bakta/PGAP/Prokka	PGAP	Bakta	Bakta	Prokka	Prokka	EggNOG-Mapper	Bakta	EggNOG-Mapper	EggNOG-Mapper	EggNOG-Mapper
GCA_000418775.1	PGAP	Bakta	Bakta	PGAP	Bakta	Bakta/PGAP/Prokka	PGAP	Bakta	Bakta	Prokka	Prokka	EggNOG-Mapper	Bakta	EggNOG-Mapper	EggNOG-Mapper	EggNOG-Mapper
GCA_000418795.1	PGAP	Bakta	Bakta	PGAP	Bakta	Bakta/PGAP/Prokka	PGAP	PGAP	Bakta	Prokka	Prokka	EggNOG-Mapper	EggNOG-Mapper	EggNOG-Mapper	EggNOG-Mapper	EggNOG-Mapper
GCA_000432955.1	PGAP	Bakta	Bakta	Bakta/PGAP/Prokka	Bakta	Bakta/PGAP/Prokka	PGAP	Bakta	Bakta	Prokka	Prokka	Prokka	EggNOG-Mapper	EggNOG-Mapper	EggNOG-Mapper	EggNOG-Mapper
GCA_000442065.2	PGAP	Bakta	Bakta	PGAP	Bakta	Bakta/PGAP/Prokka	PGAP	Bakta	Bakta	Prokka	Prokka	Prokka	Bakta	EggNOG-Mapper	EggNOG-Mapper	EggNOG-Mapper
GCA_000442085.2	PGAP	Bakta	Bakta	PGAP	Bakta	Bakta/PGAP/Prokka	PGAP	Bakta	Bakta	Prokka	Prokka	Prokka	EggNOG-Mapper	EggNOG-Mapper	EggNOG-Mapper	EggNOG-Mapper
GCA_000446075.2	PGAP	Bakta	Bakta	PGAP	Bakta	Bakta/PGAP/Prokka	PGAP	Bakta	Bakta	Prokka	Prokka	Prokka	Bakta	EggNOG-Mapper	EggNOG-Mapper	EggNOG-Mapper
GCA_000446095.2	PGAP	Bakta	Bakta	PGAP	Bakta	Bakta/PGAP/Prokka	PGAP	PGAP	Bakta	Prokka	Prokka	Prokka	Bakta	EggNOG-Mapper	EggNOG-Mapper	EggNOG-Mapper
GCA_000446115.2	PGAP	Bakta	Bakta	PGAP	Bakta	Bakta/PGAP/Prokka	PGAP	Bakta	Bakta	Prokka	Prokka	Prokka	Bakta	Bakta	EggNOG-Mapper	EggNOG-Mapper
GCA_000446135.2	PGAP	Bakta	Bakta	PGAP	Bakta	Bakta/PGAP/Prokka	PGAP	PGAP	Bakta	Prokka	Prokka	Prokka	Bakta	EggNOG-Mapper	EggNOG-Mapper	EggNOG-Mapper
GCA_000446155.2	PGAP	Bakta	Bakta	Bakta/PGAP/Prokka	Bakta	Bakta/PGAP/Prokka	PGAP	Bakta	Bakta	Prokka	Prokka	Prokka	Bakta	Bakta	EggNOG-Mapper	EggNOG-Mapper
GCA_000446175.2	PGAP	Bakta	Bakta	PGAP	Bakta	Bakta/PGAP/Prokka	PGAP	PGAP	Bakta	Prokka	Prokka	Prokka	Bakta	Bakta	EggNOG-Mapper	EggNOG-Mapper
GCA_000446195.2	PGAP	Bakta	Bakta	PGAP	Bakta	Bakta/PGAP/Prokka	PGAP	PGAP	Bakta	Prokka	Prokka	Prokka	Bakta	Bakta	EggNOG-Mapper	EggNOG-Mapper
GCA_000446225.2	PGAP	Bakta	Bakta	PGAP	Bakta	Bakta/PGAP/Prokka	PGAP	Bakta	Bakta	Prokka	Prokka	Prokka	Bakta	EggNOG-Mapper	EggNOG-Mapper	EggNOG-Mapper
GCA_000446245.1	PGAP	Bakta	Bakta	PGAP	Bakta	Bakta/PGAP/Prokka	PGAP	Bakta	Bakta	PGAP	Prokka	Prokka	Bakta	EggNOG-Mapper	EggNOG-Mapper	EggNOG-Mapper
GCA_000446265.2	PGAP	Bakta	Bakta	PGAP	Bakta	Bakta/PGAP/Prokka	PGAP	Bakta	Bakta	Prokka	Prokka	Prokka	Bakta	Bakta	EggNOG-Mapper	EggNOG-Mapper
GCA_000446285.2	PGAP	Bakta	Bakta	Bakta/PGAP/Prokka	Bakta	Bakta/PGAP/Prokka	PGAP	Bakta	Bakta	Prokka	Prokka	Prokka	Bakta	EggNOG-Mapper	EggNOG-Mapper	EggNOG-Mapper
GCA_000446305.2	PGAP	Bakta	Bakta	PGAP	Bakta	Bakta/PGAP/Prokka	PGAP	PGAP	Bakta	Prokka	Prokka	Prokka	Bakta	Bakta	EggNOG-Mapper	EggNOG-Mapper
GCA_000446325.2	PGAP	Bakta	Bakta	PGAP	Bakta	Bakta/PGAP/Prokka	PGAP	Bakta	Bakta	Prokka	Prokka	Prokka	Bakta	Bakta	EggNOG-Mapper	EggNOG-Mapper
GCA_000446345.2	PGAP	Bakta	Bakta	Bakta/PGAP/Prokka	Bakta	Bakta/PGAP/Prokka	PGAP	Bakta	Bakta	Prokka	Prokka	Prokka	EggNOG-Mapper	EggNOG-Mapper	EggNOG-Mapper	EggNOG-Mapper
GCA_000446365.2	PGAP	Bakta	Bakta	Bakta/PGAP/Prokka	Bakta	Bakta/PGAP/Prokka	PGAP	Bakta	Bakta	Prokka	Prokka	Prokka	Bakta	Bakta	EggNOG-Mapper	EggNOG-Mapper
GCA_000446385.2	PGAP	Bakta	Bakta	PGAP	Bakta	Bakta/PGAP/Prokka	PGAP	Bakta	Bakta	Prokka	Prokka	Prokka	Bakta	EggNOG-Mapper	EggNOG-Mapper	EggNOG-Mapper
GCA_000446405.2	PGAP	Bakta	Bakta	PGAP	Bakta	Bakta/PGAP/Prokka	PGAP	PGAP	Bakta	Prokka	Prokka	Prokka	Bakta	Bakta	EggNOG-Mapper	EggNOG-Mapper
GCA_000446425.2	PGAP	Bakta	Bakta	PGAP	Bakta	Bakta/PGAP/Prokka	PGAP	PGAP	Bakta	Prokka	Prokka	Prokka	Bakta	Bakta	EggNOG-Mapper	EggNOG-Mapper
GCA_000446445.2	PGAP	Bakta	Bakta	PGAP	Bakta	Bakta/PGAP/Prokka	PGAP	PGAP	Bakta	Prokka	Prokka	Prokka	Bakta	EggNOG-Mapper	EggNOG-Mapper	EggNOG-Mapper
GCA_000446465.2	PGAP	Bakta	Bakta	PGAP	Bakta	Bakta/PGAP/Prokka	PGAP	PGAP	Bakta	Prokka	Prokka	Prokka	Bakta	Bakta	EggNOG-Mapper	EggNOG-Mapper
GCA_000446485.2	PGAP	Bakta	Bakta	PGAP	Bakta	Bakta/PGAP/Prokka	PGAP	PGAP	Bakta	Prokka	Prokka	Prokka	Bakta	Bakta	EggNOG-Mapper	EggNOG-Mapper
GCA_000446505.2	PGAP	Bakta	Bakta	Bakta/PGAP/Prokka	Bakta	Bakta/PGAP/Prokka	PGAP	Bakta	Bakta	Prokka	Prokka	Prokka	Bakta	Bakta	EggNOG-Mapper	EggNOG-Mapper
GCA_000446525.2	PGAP	Bakta	Bakta	PGAP	Bakta	Bakta/PGAP/Prokka	PGAP	Bakta	Bakta	Prokka	Prokka	Prokka	Bakta/EggNOG-Mapper	EggNOG-Mapper	EggNOG-Mapper	EggNOG-Mapper
GCA_000446545.2	PGAP	Bakta	Bakta	PGAP	Bakta	Bakta/PGAP/Prokka	PGAP	PGAP	Bakta	Prokka	Prokka	Prokka	Bakta	EggNOG-Mapper	EggNOG-Mapper	EggNOG-Mapper
GCA_000446565.2	PGAP	Bakta	Bakta	PGAP	Bakta	Bakta/PGAP/Prokka	PGAP	PGAP	Bakta	Prokka	Prokka	Prokka	Bakta	Bakta	EggNOG-Mapper	EggNOG-Mapper
GCA_000446585.2	PGAP	Bakta	Bakta	PGAP	Bakta	Bakta/PGAP/Prokka	PGAP	Bakta	Bakta	Prokka	Prokka	Prokka	Bakta	Bakta	EggNOG-Mapper	EggNOG-Mapper
GCA_000446605.2	PGAP	Bakta	Bakta	PGAP	Bakta	Bakta/PGAP/Prokka	PGAP	Bakta	Bakta	Prokka	Prokka	Prokka	Bakta	EggNOG-Mapper	EggNOG-Mapper	EggNOG-Mapper
GCA_000446625.2	PGAP	Bakta	Bakta	Bakta/PGAP/Prokka	Bakta	Bakta/PGAP/Prokka	PGAP	Bakta	Bakta	Prokka	Prokka	Prokka	Bakta	EggNOG-Mapper	EggNOG-Mapper	EggNOG-Mapper
GCA_000446645.2	PGAP	Bakta	Bakta	Bakta/PGAP/Prokka	Bakta	Bakta/PGAP/Prokka	PGAP	Bakta	Bakta	Prokka	Prokka	Prokka	Bakta	EggNOG-Mapper	EggNOG-Mapper	EggNOG-Mapper
GCA_000446665.2	PGAP	Bakta	Bakta	PGAP	Bakta/PGAP/Prokka	Bakta/PGAP/Prokka	PGAP	Bakta	Bakta	Prokka	Prokka	Prokka	Bakta	EggNOG-Mapper	EggNOG-Mapper	EggNOG-Mapper
GCA_000446685.2	PGAP	Bakta	Bakta	Bakta/PGAP/Prokka	Bakta	Bakta/PGAP/Prokka	PGAP	Bakta	Bakta	Prokka	Prokka	Prokka	Bakta	EggNOG-Mapper	EggNOG-Mapper	EggNOG-Mapper
GCA_000446705.2	PGAP	Bakta	Bakta	PGAP	Bakta	Bakta/PGAP/Prokka	PGAP	Bakta	Bakta	Prokka	Prokka	Prokka	Bakta	EggNOG-Mapper	EggNOG-Mapper	EggNOG-Mapper
GCA_000446725.2	PGAP	Bakta	Bakta	PGAP	Bakta	Bakta/PGAP/Prokka	PGAP	Bakta	Bakta	Prokka	Prokka	Prokka	Bakta	Bakta	EggNOG-Mapper	EggNOG-Mapper
GCA_000446745.2	PGAP	Bakta	Bakta	PGAP	Bakta	Bakta/PGAP/Prokka	PGAP	Bakta	Bakta	Prokka	Prokka	Prokka	Bakta	Bakta	EggNOG-Mapper	EggNOG-Mapper
GCA_000446765.2	PGAP	Bakta	Bakta	PGAP	Bakta	Bakta/PGAP/Prokka	PGAP	Bakta	Bakta	Prokka	Prokka	Prokka	Bakta	EggNOG-Mapper	EggNOG-Mapper	EggNOG-Mapper
GCA_000446785.2	PGAP	Bakta	Bakta	PGAP	Bakta	Bakta/PGAP/Prokka	PGAP	Bakta	Bakta	Prokka	Prokka	Prokka	Bakta	EggNOG-Mapper	EggNOG-Mapper	EggNOG-Mapper
GCA_000446805.2	PGAP	Bakta	Bakta	PGAP	Bakta	Bakta/PGAP/Prokka	PGAP	PGAP	Bakta	Prokka	Prokka	Prokka	Bakta	Bakta	EggNOG-Mapper	EggNOG-Mapper
GCA_000446825.2	PGAP	Bakta	Bakta	PGAP	Bakta	Bakta/PGAP/Prokka	PGAP	PGAP	Bakta	Prokka	Prokka	Prokka	Bakta	EggNOG-Mapper	EggNOG-Mapper	EggNOG-Mapper
GCA_000446845.2	PGAP	Bakta	Bakta	PGAP	Bakta	Bakta/PGAP/Prokka	PGAP	Bakta	Bakta	Prokka	Prokka	Prokka	EggNOG-Mapper	EggNOG-Mapper	EggNOG-Mapper	EggNOG-Mapper
GCA_000446865.2	PGAP	Bakta	Bakta	PGAP	Bakta	Bakta/PGAP/Prokka	PGAP	PGAP	Bakta	Prokka	Prokka	Prokka	EggNOG-Mapper	EggNOG-Mapper	EggNOG-Mapper	EggNOG-Mapper
GCA_000446885.2	PGAP	Bakta	Bakta	PGAP	Bakta	Bakta/PGAP/Prokka	PGAP	PGAP	Bakta	Prokka	Prokka	Prokka	Bakta	Bakta	EggNOG-Mapper	EggNOG-Mapper
GCA_000446905.2	PGAP	Bakta	Bakta	PGAP	Bakta	Bakta/PGAP/Prokka	PGAP	Bakta	Bakta	Prokka	Prokka	Prokka	Bakta	EggNOG-Mapper	EggNOG-Mapper	EggNOG-Mapper
GCA_000446925.2	PGAP	Bakta	Bakta	PGAP	Bakta	Bakta/PGAP/Prokka	PGAP	Bakta	Bakta	Prokka	Prokka	Prokka	Bakta	Bakta	EggNOG-Mapper	EggNOG-Mapper
GCA_000446945.2	PGAP	Bakta	Bakta	Bakta/PGAP/Prokka	Bakta	Bakta/PGAP/Prokka	PGAP	Bakta	Bakta	Prokka	Prokka	Prokka	Bakta	EggNOG-Mapper	EggNOG-Mapper	EggNOG-Mapper
GCA_000446965.2	PGAP	Bakta	Bakta	PGAP	Bakta	Bakta/PGAP/Prokka	PGAP	PGAP	Bakta	Prokka	Prokka	Prokka	Bakta	Bakta	EggNOG-Mapper	EggNOG-Mapper
GCA_000446985.2	PGAP	Bakta	Bakta	PGAP	Bakta	Bakta/PGAP/Prokka	PGAP	PGAP	Bakta	Prokka	Prokka	Prokka	Bakta	Bakta	EggNOG-Mapper	EggNOG-Mapper
GCA_000447005.2	PGAP	Bakta	Bakta	PGAP	Bakta	Bakta/PGAP/Prokka	PGAP	PGAP	Bakta	Prokka	Prokka	Prokka	Bakta	Bakta	EggNOG-Mapper	EggNOG-Mapper
GCA_000447025.2	PGAP	Bakta	Bakta	PGAP	Bakta	Bakta/PGAP/Prokka	PGAP	Bakta	Bakta	Prokka	Prokka	Prokka	Bakta	EggNOG-Mapper	EggNOG-Mapper	EggNOG-Mapper
GCA_000447045.2	PGAP	Bakta	Bakta	Bakta/PGAP/Prokka	Bakta	Bakta/PGAP/Prokka	PGAP	Bakta	Bakta	Prokka	Prokka	Prokka	Bakta	Bakta	EggNOG-Mapper	EggNOG-Mapper
GCA_000447065.2	PGAP	Bakta	Bakta	Bakta/PGAP/Prokka	Bakta	Bakta/PGAP/Prokka	PGAP	Bakta	Bakta	Prokka	Prokka	Prokka	Bakta	EggNOG-Mapper	EggNOG-Mapper	EggNOG-Mapper
GCA_000447085.2	PGAP	Bakta	Bakta	Bakta/PGAP/Prokka	Bakta	Bakta/PGAP/Prokka	PGAP	Bakta	Bakta	Prokka	Prokka	Prokka	Bakta	Bakta	EggNOG-Mapper	EggNOG-Mapper
GCA_000447105.2	PGAP	Bakta	Bakta	Bakta/PGAP/Prokka	Bakta	Bakta/PGAP/Prokka	PGAP	PGAP	Bakta	Prokka	Prokka	Prokka	EggNOG-Mapper	EggNOG-Mapper	EggNOG-Mapper	EggNOG-Mapper
GCA_000447125.2	PGAP	Bakta	Bakta	PGAP	Bakta	Bakta/PGAP/Prokka	PGAP	Bakta	Bakta	Prokka	Prokka	Prokka	Bakta	EggNOG-Mapper	EggNOG-Mapper	EggNOG-Mapper
GCA_000447145.2	PGAP	Bakta	Bakta	PGAP	Bakta	Bakta/PGAP/Prokka	PGAP	PGAP	Bakta	Prokka	Prokka	Prokka	Bakta	Bakta	EggNOG-Mapper	EggNOG-Mapper
GCA_000456005.1	PGAP	Bakta	Bakta	Bakta/Prokka	Bakta/PGAP/Prokka	Bakta/PGAP/Prokka	PGAP	Bakta	Bakta	EggNOG-Mapper	Prokka	Prokka	Bakta	EggNOG-Mapper	EggNOG-Mapper	EggNOG-Mapper
GCA_000456025.1	PGAP	Bakta	Bakta	Bakta/PGAP/Prokka	Bakta	Bakta/PGAP/Prokka	PGAP	Bakta	Bakta	EggNOG-Mapper	Prokka	Prokka	Bakta	EggNOG-Mapper	EggNOG-Mapper	EggNOG-Mapper
GCA_000456045.1	PGAP	Bakta	Bakta	Prokka	Bakta/PGAP/Prokka	Bakta/PGAP/Prokka	PGAP	Bakta	Bakta	EggNOG-Mapper	Prokka	Prokka	Bakta	EggNOG-Mapper	EggNOG-Mapper	EggNOG-Mapper
GCA_000456065.1	PGAP	Bakta	Bakta	Prokka	Bakta/PGAP/Prokka	Bakta/PGAP/Prokka	PGAP	Bakta	Bakta	EggNOG-Mapper	Prokka	Prokka	Bakta	EggNOG-Mapper	EggNOG-Mapper	EggNOG-Mapper
GCA_000456085.1	PGAP	Bakta	Bakta	Prokka	Bakta/PGAP/Prokka	Bakta/PGAP/Prokka	PGAP	Bakta	Bakta	PGAP	Prokka	Prokka	Bakta	EggNOG-Mapper	EggNOG-Mapper	EggNOG-Mapper
GCA_000456105.1	PGAP	Bakta	Bakta	Bakta/PGAP/Prokka	Bakta	Bakta/PGAP/Prokka	PGAP	Bakta	Bakta	EggNOG-Mapper	Prokka	Prokka	Bakta	EggNOG-Mapper	EggNOG-Mapper	EggNOG-Mapper
GCA_000456125.1	PGAP	Bakta	Bakta	Prokka	Bakta/PGAP/Prokka	Bakta/PGAP/Prokka	PGAP	Bakta	Bakta	PGAP	Prokka	Prokka	Bakta	EggNOG-Mapper	EggNOG-Mapper	EggNOG-Mapper
GCA_000456145.1	PGAP	Bakta	Bakta	Bakta/Prokka	Bakta/PGAP/Prokka	Bakta/PGAP/Prokka	PGAP	Bakta	Bakta	EggNOG-Mapper	Prokka	Prokka	Bakta	EggNOG-Mapper	EggNOG-Mapper	EggNOG-Mapper
GCA_000456165.1	PGAP	Bakta	Bakta	PGAP/Prokka	Bakta	Bakta/PGAP/Prokka	PGAP	Bakta	Bakta	EggNOG-Mapper	Prokka	Prokka	Bakta	EggNOG-Mapper	EggNOG-Mapper	EggNOG-Mapper
GCA_000456185.1	PGAP	Bakta	Bakta	PGAP	Bakta	Bakta/PGAP/Prokka	PGAP	Bakta	Bakta	EggNOG-Mapper	Prokka	Prokka	Bakta	EggNOG-Mapper	EggNOG-Mapper	EggNOG-Mapper
GCA_000456205.1	PGAP	Bakta	Bakta	Bakta/Prokka	Bakta/PGAP/Prokka	Bakta/PGAP/Prokka	PGAP	Bakta	Bakta	EggNOG-Mapper	Prokka	Prokka	Bakta	EggNOG-Mapper	EggNOG-Mapper	EggNOG-Mapper
GCA_000456225.1	PGAP	Bakta	Bakta	Prokka	Bakta	Bakta/PGAP/Prokka	PGAP	Bakta	Bakta	EggNOG-Mapper	Prokka	Prokka	Bakta	EggNOG-Mapper	EggNOG-Mapper	EggNOG-Mapper
GCA_000456245.1	PGAP	Bakta	Bakta	PGAP	Bakta	Bakta/PGAP/Prokka	PGAP	Bakta	Bakta	EggNOG-Mapper	Prokka	Prokka	Bakta	EggNOG-Mapper	EggNOG-Mapper	EggNOG-Mapper
GCA_000456265.1	PGAP	Bakta	Bakta	PGAP	Bakta	Bakta/PGAP/Prokka	Bakta	Bakta	Bakta	EggNOG-Mapper	Prokka	EggNOG-Mapper	Bakta	EggNOG-Mapper	EggNOG-Mapper	EggNOG-Mapper
GCA_000456285.1	PGAP	Bakta	Bakta	Prokka	Bakta	Bakta/PGAP/Prokka	PGAP	Bakta	Bakta	EggNOG-Mapper	Prokka	Prokka	Bakta	EggNOG-Mapper	EggNOG-Mapper	EggNOG-Mapper
GCA_000456305.1	PGAP	Bakta	Bakta	PGAP/Prokka	Bakta	Bakta/PGAP/Prokka	PGAP	Bakta	Bakta	EggNOG-Mapper	Prokka	Prokka	Bakta	EggNOG-Mapper	EggNOG-Mapper	EggNOG-Mapper
GCA_000456325.1	PGAP	Bakta	Bakta	Prokka	Bakta	Bakta/PGAP/Prokka	PGAP	Bakta	Bakta	EggNOG-Mapper	Prokka	Prokka	Bakta	EggNOG-Mapper	EggNOG-Mapper	EggNOG-Mapper
GCA_000456345.1	PGAP	Bakta	Bakta	Prokka	Bakta	Bakta/PGAP/Prokka	PGAP	Bakta	Bakta	EggNOG-Mapper	Prokka	Prokka	Bakta	EggNOG-Mapper	EggNOG-Mapper	EggNOG-Mapper
GCA_000456365.1	PGAP	Bakta	Bakta	PGAP	Bakta	Bakta/PGAP/Prokka	PGAP	Bakta	Bakta	EggNOG-Mapper	Prokka	Prokka	Bakta	EggNOG-Mapper	EggNOG-Mapper	EggNOG-Mapper
GCA_000456385.1	PGAP	Bakta	Bakta	Prokka	Bakta	Bakta/PGAP/Prokka	PGAP	Bakta	Bakta	EggNOG-Mapper	Prokka	Prokka	Bakta	EggNOG-Mapper	EggNOG-Mapper	EggNOG-Mapper
GCA_000456405.1	PGAP	Bakta	Bakta	Prokka	Bakta	Bakta/PGAP/Prokka	PGAP	Bakta	Bakta	EggNOG-Mapper	Prokka	Prokka	Bakta	EggNOG-Mapper	EggNOG-Mapper	EggNOG-Mapper
GCA_000456425.1	PGAP	Bakta	Bakta	Prokka	Bakta/PGAP/Prokka	Bakta/PGAP/Prokka	PGAP	Bakta	Bakta	EggNOG-Mapper	Prokka	Prokka	Bakta	EggNOG-Mapper	EggNOG-Mapper	EggNOG-Mapper
GCA_000456445.1	PGAP	Bakta	Bakta	PGAP	Bakta	Bakta/PGAP/Prokka	PGAP	Bakta	Bakta	EggNOG-Mapper	Prokka	Prokka	Bakta	EggNOG-Mapper	EggNOG-Mapper	EggNOG-Mapper
GCA_000456465.1	PGAP	Bakta	Bakta	PGAP	Bakta/PGAP/Prokka	Bakta/PGAP/Prokka	PGAP	Bakta	Bakta	EggNOG-Mapper	Prokka	Prokka	Bakta	EggNOG-Mapper	EggNOG-Mapper	EggNOG-Mapper
GCA_000456485.1	PGAP	Bakta	Bakta	Prokka	Bakta	Bakta/PGAP/Prokka	PGAP	Bakta	Bakta	EggNOG-Mapper	Prokka	Prokka	Bakta	EggNOG-Mapper	EggNOG-Mapper	EggNOG-Mapper
GCA_000456505.1	PGAP	Bakta	Bakta	Bakta/Prokka	Bakta/PGAP/Prokka	Bakta/PGAP/Prokka	PGAP	Bakta	Bakta	EggNOG-Mapper	Prokka	Prokka	Bakta	EggNOG-Mapper	EggNOG-Mapper	EggNOG-Mapper
GCA_000456525.1	Bakta	Bakta	Bakta	Prokka	Bakta	Bakta/PGAP/Prokka	PGAP	Bakta	Bakta	EggNOG-Mapper	Prokka	Prokka	Bakta	EggNOG-Mapper	EggNOG-Mapper	EggNOG-Mapper
GCA_000456545.1	PGAP	Bakta	Bakta	PGAP	Bakta/PGAP/Prokka	Bakta/PGAP/Prokka	PGAP	Bakta	Bakta	EggNOG-Mapper	Prokka	Prokka	Bakta	EggNOG-Mapper	EggNOG-Mapper	EggNOG-Mapper
GCA_000456565.1	PGAP	Bakta	Bakta	Bakta/Prokka	Bakta	Bakta/PGAP/Prokka	PGAP	Bakta	Bakta	EggNOG-Mapper	Prokka	Prokka	Bakta	EggNOG-Mapper	EggNOG-Mapper	EggNOG-Mapper
GCA_000456585.1	PGAP	Bakta	Bakta	Bakta/Prokka	Bakta	Bakta/PGAP/Prokka	PGAP	Bakta	Bakta	EggNOG-Mapper	Prokka	EggNOG-Mapper	Bakta	EggNOG-Mapper	EggNOG-Mapper	EggNOG-Mapper
GCA_000456605.1	PGAP	Bakta	Bakta	Bakta/PGAP/Prokka	Bakta	Bakta/PGAP/Prokka	PGAP	Bakta	Bakta	EggNOG-Mapper	Prokka	Prokka	Bakta	EggNOG-Mapper	EggNOG-Mapper	EggNOG-Mapper
GCA_000456625.1	PGAP	Bakta	Bakta	Prokka	Bakta	Bakta/PGAP/Prokka	PGAP	Bakta	Bakta	PGAP	Prokka	Prokka	Bakta	EggNOG-Mapper	EggNOG-Mapper	EggNOG-Mapper
GCA_000456645.1	PGAP	Bakta	Bakta	Prokka	Bakta/PGAP/Prokka	Bakta/PGAP/Prokka	PGAP	Bakta	Bakta	EggNOG-Mapper	Prokka	Prokka	Bakta	EggNOG-Mapper	EggNOG-Mapper	EggNOG-Mapper
GCA_000456665.1	PGAP	Bakta	Bakta	Prokka	Bakta	Bakta/PGAP/Prokka	PGAP	Bakta	Bakta	EggNOG-Mapper	Prokka	Prokka	Bakta	EggNOG-Mapper	EggNOG-Mapper	EggNOG-Mapper
GCA_000456685.1	PGAP	Bakta	Bakta	Prokka	Bakta	Bakta/PGAP/Prokka	PGAP	Bakta	Bakta	EggNOG-Mapper	Prokka	Prokka	Bakta	EggNOG-Mapper	EggNOG-Mapper	EggNOG-Mapper
GCA_000456705.1	PGAP	Bakta	Bakta	Prokka	Bakta	Bakta/PGAP/Prokka	PGAP	Bakta	Bakta	EggNOG-Mapper	Prokka	Prokka	Bakta	EggNOG-Mapper	EggNOG-Mapper	EggNOG-Mapper
GCA_000456725.1	PGAP	Bakta	Bakta	Bakta/Prokka	Bakta	Bakta/PGAP/Prokka	PGAP	Bakta	Bakta	EggNOG-Mapper	Prokka	Prokka	Bakta	EggNOG-Mapper	EggNOG-Mapper	EggNOG-Mapper
GCA_000456745.1	PGAP	Bakta	Bakta	Bakta/Prokka	Bakta/PGAP/Prokka	Bakta/PGAP/Prokka	PGAP	Bakta	Bakta	EggNOG-Mapper	Prokka	Prokka	Bakta	EggNOG-Mapper	EggNOG-Mapper	EggNOG-Mapper
GCA_000456765.1	PGAP	Bakta	Bakta	Prokka	Bakta/PGAP/Prokka	Bakta/PGAP/Prokka	PGAP	Bakta	Bakta	PGAP	Prokka	Prokka	Bakta	EggNOG-Mapper	EggNOG-Mapper	EggNOG-Mapper
GCA_000456785.1	PGAP	Bakta	Bakta	Prokka	Bakta	Bakta/PGAP/Prokka	PGAP	Bakta	Bakta	EggNOG-Mapper	Prokka	Prokka	Bakta	EggNOG-Mapper	EggNOG-Mapper	EggNOG-Mapper
GCA_000456805.1	PGAP	Bakta	Bakta	Prokka	Bakta	Bakta/PGAP/Prokka	PGAP	Bakta	Bakta	EggNOG-Mapper	Prokka	Prokka	Bakta	EggNOG-Mapper	EggNOG-Mapper	EggNOG-Mapper
GCA_000456825.1	PGAP	Bakta	Bakta	Prokka	Bakta/PGAP/Prokka	Bakta/PGAP/Prokka	PGAP	Bakta	Bakta	EggNOG-Mapper	Prokka	Prokka	Bakta	EggNOG-Mapper	EggNOG-Mapper	EggNOG-Mapper
GCA_000456845.1	PGAP	Bakta	Bakta	Bakta/Prokka	Bakta/PGAP/Prokka	Bakta/PGAP/Prokka	PGAP	Bakta	Bakta	EggNOG-Mapper	Prokka	Prokka	Bakta	EggNOG-Mapper	EggNOG-Mapper	EggNOG-Mapper
GCA_000456865.1	PGAP	Bakta	Bakta	Prokka	Bakta	Bakta/PGAP/Prokka	PGAP	Bakta	Bakta	PGAP	Prokka	Prokka	Bakta	EggNOG-Mapper	EggNOG-Mapper	EggNOG-Mapper
GCA_000456885.1	PGAP	Bakta	Bakta	PGAP	Bakta	Bakta/PGAP/Prokka	PGAP	Bakta	Bakta	EggNOG-Mapper	Prokka	Prokka	Bakta	EggNOG-Mapper	EggNOG-Mapper	EggNOG-Mapper
GCA_000456905.1	PGAP	Bakta	Bakta	Prokka	Bakta	Bakta/PGAP/Prokka	PGAP	Bakta	Bakta	PGAP	Prokka	Prokka	Bakta	EggNOG-Mapper	EggNOG-Mapper	EggNOG-Mapper
GCA_000456925.1	PGAP	Bakta	Bakta	PGAP	Bakta	Bakta/PGAP/Prokka	PGAP	Bakta	Bakta	EggNOG-Mapper	Prokka	Prokka	Bakta	EggNOG-Mapper	EggNOG-Mapper	EggNOG-Mapper
GCA_000456945.1	PGAP	Bakta	Bakta	Bakta/PGAP/Prokka	Bakta	Bakta/PGAP/Prokka	PGAP	Bakta	Bakta	EggNOG-Mapper	Prokka	Prokka	Bakta	EggNOG-Mapper	EggNOG-Mapper	EggNOG-Mapper
GCA_000456965.1	PGAP	Bakta	Bakta	Prokka	Bakta	Bakta/PGAP/Prokka	PGAP	Bakta	Bakta	PGAP	Prokka	Prokka	Bakta	EggNOG-Mapper	EggNOG-Mapper	EggNOG-Mapper
GCA_000456985.1	PGAP	Bakta	Bakta	PGAP	Bakta	Bakta/PGAP/Prokka	PGAP	Bakta	Bakta	EggNOG-Mapper	Prokka	Prokka	Bakta	EggNOG-Mapper	EggNOG-Mapper	EggNOG-Mapper
GCA_000457005.1	PGAP	Bakta	Bakta	Prokka	Bakta	Bakta/PGAP/Prokka	PGAP	Bakta	Bakta	EggNOG-Mapper	Prokka	Prokka	Bakta	EggNOG-Mapper	EggNOG-Mapper	EggNOG-Mapper
GCA_000457025.1	PGAP	Bakta	Bakta	Prokka	Bakta	Bakta/PGAP/Prokka	PGAP	Bakta	Bakta	EggNOG-Mapper	Prokka	Prokka	Bakta	EggNOG-Mapper	EggNOG-Mapper	EggNOG-Mapper
GCA_000457045.1	PGAP	Bakta	Bakta	Bakta/Prokka	Bakta	Bakta/PGAP/Prokka	PGAP	Bakta	Bakta	EggNOG-Mapper	Prokka	Prokka	Bakta	EggNOG-Mapper	EggNOG-Mapper	EggNOG-Mapper
GCA_000457065.1	PGAP	Bakta	Bakta	Bakta/Prokka	Bakta	Bakta/PGAP/Prokka	PGAP	Bakta	Bakta	EggNOG-Mapper	Prokka	Prokka	Bakta	EggNOG-Mapper	EggNOG-Mapper	EggNOG-Mapper
GCA_000457085.1	PGAP	Bakta	Bakta	Prokka	Bakta	Bakta/PGAP/Prokka	PGAP	Bakta	Bakta	EggNOG-Mapper	Prokka	Prokka	EggNOG-Mapper	EggNOG-Mapper	EggNOG-Mapper	EggNOG-Mapper
GCA_000457105.1	PGAP	Bakta	Bakta	Prokka	Bakta	Bakta/PGAP/Prokka	PGAP	Bakta	Bakta	EggNOG-Mapper	Prokka	Prokka	Bakta	EggNOG-Mapper	EggNOG-Mapper	EggNOG-Mapper
GCA_000457125.1	PGAP	Bakta	Bakta	Bakta/Prokka	Bakta	Bakta/PGAP/Prokka	PGAP	Bakta	Bakta	EggNOG-Mapper	Prokka	Prokka	Bakta	EggNOG-Mapper	EggNOG-Mapper	EggNOG-Mapper
GCA_000457145.1	PGAP	Bakta	Bakta	PGAP	Bakta	Bakta/PGAP/Prokka	PGAP	Bakta	Bakta	EggNOG-Mapper	Prokka	Prokka	Bakta	EggNOG-Mapper	EggNOG-Mapper	EggNOG-Mapper
GCA_000457165.1	PGAP	Bakta	Bakta	Prokka	Bakta	Bakta/PGAP/Prokka	PGAP	Bakta	Bakta	EggNOG-Mapper	Prokka	Prokka	Bakta	Bakta	EggNOG-Mapper	EggNOG-Mapper
GCA_000457185.1	PGAP	Bakta	Bakta	Prokka	Bakta	Bakta/PGAP/Prokka	PGAP	Bakta	Bakta	EggNOG-Mapper	Prokka	Prokka	Bakta	EggNOG-Mapper	EggNOG-Mapper	EggNOG-Mapper
GCA_000457205.1	PGAP	Bakta	Bakta	Bakta/PGAP/Prokka	Bakta	Bakta/PGAP/Prokka	PGAP	Bakta	Bakta	EggNOG-Mapper	Prokka	Prokka	Bakta	EggNOG-Mapper	EggNOG-Mapper	EggNOG-Mapper
GCA_000457225.1	PGAP	Bakta	Bakta	Bakta/PGAP/Prokka	Bakta	Bakta/PGAP/Prokka	PGAP	Bakta	Bakta	EggNOG-Mapper	Prokka	Prokka	Bakta	EggNOG-Mapper	EggNOG-Mapper	EggNOG-Mapper
GCA_000457245.1	PGAP	Bakta	Bakta	Bakta/Prokka	Bakta/PGAP/Prokka	Bakta/PGAP/Prokka	Bakta	Bakta	Bakta	EggNOG-Mapper	Prokka	Prokka	Bakta	EggNOG-Mapper	EggNOG-Mapper	EggNOG-Mapper
GCA_000457265.1	PGAP	Bakta	Bakta	Prokka	Bakta/PGAP/Prokka	Bakta/PGAP/Prokka	PGAP	Bakta	Bakta	PGAP	Prokka	Prokka	Bakta	EggNOG-Mapper	EggNOG-Mapper	EggNOG-Mapper
GCA_000457285.1	PGAP	Bakta	Bakta	Prokka	Bakta	Bakta/PGAP/Prokka	PGAP	Bakta	Bakta	EggNOG-Mapper	Prokka	Prokka	Bakta	EggNOG-Mapper	EggNOG-Mapper	EggNOG-Mapper
GCA_000457305.1	PGAP	Bakta	Bakta	Prokka	Bakta	Bakta/PGAP/Prokka	PGAP	Bakta	Bakta	EggNOG-Mapper	Prokka	Prokka	Bakta	EggNOG-Mapper	EggNOG-Mapper	EggNOG-Mapper
GCA_000457325.1	PGAP	Bakta	Bakta	Bakta/Prokka	Bakta/PGAP/Prokka	Bakta/PGAP/Prokka	PGAP	Bakta	Bakta	EggNOG-Mapper	Prokka	Prokka	Bakta	EggNOG-Mapper	EggNOG-Mapper	EggNOG-Mapper
GCA_000457345.1	PGAP	Bakta	Bakta	Prokka	Bakta	Bakta/PGAP/Prokka	PGAP	Bakta	Bakta	PGAP	Prokka	Prokka	Bakta	EggNOG-Mapper	EggNOG-Mapper	EggNOG-Mapper
GCA_000457385.1	PGAP	Bakta	Bakta	PGAP	Bakta/PGAP/Prokka	Bakta/PGAP/Prokka	PGAP	Bakta	Bakta	EggNOG-Mapper	Prokka	Prokka	Bakta	EggNOG-Mapper	EggNOG-Mapper	EggNOG-Mapper
GCA_000457405.1	PGAP	Bakta	Bakta	PGAP/Prokka	Bakta/PGAP/Prokka	Bakta/PGAP/Prokka	PGAP	Bakta	Bakta	PGAP	Prokka	Prokka	Bakta	EggNOG-Mapper	EggNOG-Mapper	EggNOG-Mapper
GCA_000457435.1	PGAP	Bakta	Bakta	Prokka	Bakta/PGAP/Prokka	Bakta/PGAP/Prokka	PGAP	Bakta	Bakta	EggNOG-Mapper	Prokka	Prokka	Bakta	EggNOG-Mapper	EggNOG-Mapper	EggNOG-Mapper
GCA_000457455.1	PGAP	Bakta	Bakta	PGAP/Prokka	Bakta	Bakta/PGAP/Prokka	PGAP	Bakta	Bakta	EggNOG-Mapper	Prokka	Prokka	Bakta	EggNOG-Mapper	EggNOG-Mapper	EggNOG-Mapper
GCA_000457475.1	PGAP	Bakta	Bakta	PGAP	Bakta	Bakta/PGAP/Prokka	PGAP	Bakta	Bakta	EggNOG-Mapper	Prokka	Prokka	Bakta	EggNOG-Mapper	EggNOG-Mapper	EggNOG-Mapper
GCA_000457495.1	PGAP	Bakta	Bakta	PGAP	Bakta/PGAP/Prokka	Bakta/PGAP/Prokka	PGAP	Bakta	Bakta	EggNOG-Mapper	Prokka	Prokka	Bakta	EggNOG-Mapper	EggNOG-Mapper	EggNOG-Mapper
GCA_000457515.1	PGAP	Bakta	Bakta	Prokka	Bakta	Bakta/PGAP/Prokka	PGAP	Bakta	Bakta	EggNOG-Mapper	Prokka	Prokka	Bakta	EggNOG-Mapper	EggNOG-Mapper	EggNOG-Mapper
GCA_000457535.1	PGAP	Bakta	Bakta	PGAP	Bakta	Bakta/PGAP/Prokka	PGAP	Bakta	Bakta	EggNOG-Mapper	Prokka	Prokka	Bakta	EggNOG-Mapper	EggNOG-Mapper	EggNOG-Mapper
GCA_000457555.1	PGAP	Bakta	Bakta	Prokka	Bakta/PGAP/Prokka	Bakta/PGAP/Prokka	PGAP	Bakta	Bakta	EggNOG-Mapper	Prokka	Prokka	Bakta	EggNOG-Mapper	EggNOG-Mapper	EggNOG-Mapper
GCA_000457575.1	PGAP	Bakta	Bakta	Bakta/PGAP/Prokka	Bakta/PGAP/Prokka	Bakta/PGAP/Prokka	PGAP	Bakta	Bakta	EggNOG-Mapper	Prokka	Prokka	Bakta	EggNOG-Mapper	EggNOG-Mapper	EggNOG-Mapper
GCA_000457595.1	PGAP	Bakta	Bakta	Prokka	Bakta	Bakta/PGAP/Prokka	PGAP	Bakta	Bakta	EggNOG-Mapper	Prokka	Prokka	Bakta	EggNOG-Mapper	EggNOG-Mapper	EggNOG-Mapper
GCA_000457615.1	PGAP	Bakta	Bakta	Prokka	Bakta	Bakta/PGAP/Prokka	PGAP	Bakta	Bakta	EggNOG-Mapper	Prokka	Prokka	Bakta	EggNOG-Mapper	EggNOG-Mapper	EggNOG-Mapper
GCA_000457635.1	PGAP	Bakta	Bakta	Prokka	Bakta	Bakta/PGAP/Prokka	PGAP	Bakta	Bakta	EggNOG-Mapper	Prokka	Prokka	Bakta	EggNOG-Mapper	EggNOG-Mapper	EggNOG-Mapper
GCA_000457655.1	PGAP	Bakta	Bakta	Prokka	Bakta/PGAP/Prokka	Bakta/PGAP/Prokka	PGAP	Bakta	Bakta	EggNOG-Mapper	Prokka	Prokka	Bakta	EggNOG-Mapper	EggNOG-Mapper	EggNOG-Mapper
GCA_000457675.1	PGAP	Bakta	Bakta	Prokka	Bakta/PGAP/Prokka	Bakta/PGAP/Prokka	PGAP	Bakta	Bakta	PGAP	Prokka	Prokka	Bakta	EggNOG-Mapper	EggNOG-Mapper	EggNOG-Mapper
GCA_000457695.1	PGAP	Bakta	Bakta	PGAP	Bakta	Bakta/PGAP/Prokka	PGAP	Bakta	Bakta	PGAP	Prokka	Prokka	Bakta	EggNOG-Mapper	EggNOG-Mapper	EggNOG-Mapper
GCA_000457715.1	PGAP	Bakta	Bakta	Prokka	Bakta/PGAP/Prokka	Bakta/PGAP/Prokka	PGAP	Bakta	Bakta	EggNOG-Mapper	Prokka	Prokka	Bakta	EggNOG-Mapper	EggNOG-Mapper	EggNOG-Mapper
GCA_000457735.1	PGAP	Bakta	Bakta	PGAP	Bakta	Bakta/PGAP/Prokka	PGAP	Bakta	Bakta	EggNOG-Mapper	Prokka	Prokka	Bakta	EggNOG-Mapper	EggNOG-Mapper	EggNOG-Mapper
GCA_000457755.1	PGAP	Bakta	Bakta	Bakta/Prokka	Bakta	Bakta/PGAP/Prokka	PGAP	Bakta	Bakta	EggNOG-Mapper	Prokka	Prokka	Bakta	EggNOG-Mapper	EggNOG-Mapper	EggNOG-Mapper
GCA_000457775.1	PGAP	Bakta	Bakta	Prokka	Bakta	Bakta/PGAP/Prokka	PGAP	Bakta	Bakta	EggNOG-Mapper	Prokka	Prokka	Bakta	EggNOG-Mapper	EggNOG-Mapper	EggNOG-Mapper
GCA_000457795.1	PGAP	Bakta	Bakta	PGAP	Bakta	Bakta/PGAP/Prokka	PGAP	Bakta	Bakta	EggNOG-Mapper	Prokka	Prokka	Bakta	EggNOG-Mapper	EggNOG-Mapper	EggNOG-Mapper
GCA_000457815.1	PGAP	Bakta	Bakta	PGAP	Bakta	Bakta/PGAP/Prokka	PGAP	Bakta	Bakta	EggNOG-Mapper	Prokka	Prokka	Bakta	EggNOG-Mapper	EggNOG-Mapper	EggNOG-Mapper
GCA_000457835.1	PGAP	Bakta	Bakta	Bakta/PGAP/Prokka	Bakta	Bakta/PGAP/Prokka	PGAP	Bakta	Bakta	EggNOG-Mapper	Prokka	Prokka	Bakta	EggNOG-Mapper	EggNOG-Mapper	EggNOG-Mapper
GCA_000457855.1	PGAP	Bakta	Bakta	Bakta/Prokka	Bakta	Bakta/PGAP/Prokka	PGAP	Bakta	Bakta	EggNOG-Mapper	Prokka	Prokka	Bakta	EggNOG-Mapper	EggNOG-Mapper	EggNOG-Mapper
GCA_000457875.1	PGAP	Bakta	Bakta	Prokka	Bakta/PGAP/Prokka	Bakta/PGAP/Prokka	PGAP	Bakta	Bakta	EggNOG-Mapper	Prokka	Prokka	Bakta	EggNOG-Mapper	EggNOG-Mapper	EggNOG-Mapper
GCA_000457895.1	PGAP	Bakta	Bakta	PGAP	Bakta	Bakta/PGAP/Prokka	Bakta	Bakta	Bakta	EggNOG-Mapper	Prokka	EggNOG-Mapper	Bakta	EggNOG-Mapper	EggNOG-Mapper	EggNOG-Mapper
GCA_000457915.1	PGAP	Bakta	Bakta	Prokka	Bakta/PGAP/Prokka	Bakta/PGAP/Prokka	PGAP	Bakta	Bakta	PGAP	Prokka	Prokka	Bakta	EggNOG-Mapper	EggNOG-Mapper	EggNOG-Mapper
GCA_000457935.1	PGAP	Bakta	Bakta	Prokka	Bakta	Bakta/PGAP/Prokka	PGAP	Bakta	Bakta	EggNOG-Mapper	Prokka	Prokka	Bakta	EggNOG-Mapper	EggNOG-Mapper	EggNOG-Mapper
GCA_000457955.1	PGAP	Bakta	Bakta	Bakta/Prokka	Bakta	Bakta/PGAP/Prokka	PGAP	Bakta	Bakta	EggNOG-Mapper	Prokka	Prokka	Bakta	EggNOG-Mapper	EggNOG-Mapper	EggNOG-Mapper
GCA_000457975.1	PGAP	Bakta	Bakta	Bakta/PGAP/Prokka	Bakta	Bakta/PGAP/Prokka	PGAP	Bakta	Bakta	EggNOG-Mapper	Prokka	Prokka	Bakta	EggNOG-Mapper	EggNOG-Mapper	EggNOG-Mapper
GCA_000457995.1	PGAP	Bakta	Bakta	Bakta/Prokka	Bakta/PGAP/Prokka	Bakta/PGAP/Prokka	PGAP	Bakta	Bakta	PGAP	Prokka	Prokka	Bakta	EggNOG-Mapper	EggNOG-Mapper	EggNOG-Mapper
GCA_000458015.1	PGAP	Bakta	Bakta	Prokka	Bakta/PGAP/Prokka	Bakta/PGAP/Prokka	PGAP	Bakta	Bakta	EggNOG-Mapper	Prokka	Prokka	Bakta	EggNOG-Mapper	EggNOG-Mapper	EggNOG-Mapper
GCA_000458035.1	PGAP	Bakta	Bakta	PGAP/Prokka	Bakta	Bakta/PGAP/Prokka	Bakta	Bakta	Bakta	EggNOG-Mapper	Prokka	EggNOG-Mapper	Bakta	EggNOG-Mapper	EggNOG-Mapper	EggNOG-Mapper
GCA_000458055.1	PGAP	Bakta	Bakta	Bakta/PGAP/Prokka	Bakta	Bakta/PGAP/Prokka	PGAP	Bakta	Bakta	EggNOG-Mapper	Prokka	Prokka	Bakta	EggNOG-Mapper	EggNOG-Mapper	EggNOG-Mapper
GCA_000458075.1	PGAP	Bakta	Bakta	Prokka	Bakta/PGAP/Prokka	Bakta/PGAP/Prokka	PGAP	Bakta	Bakta	EggNOG-Mapper	Prokka	Prokka	Bakta	EggNOG-Mapper	EggNOG-Mapper	EggNOG-Mapper
GCA_000458095.1	PGAP	Bakta	Bakta	Prokka	Bakta	Bakta/PGAP/Prokka	PGAP	Bakta	Bakta	EggNOG-Mapper	Prokka	Prokka	Bakta	EggNOG-Mapper	EggNOG-Mapper	EggNOG-Mapper
GCA_000458115.1	PGAP	Bakta	Bakta	Prokka	Bakta/PGAP/Prokka	Bakta/PGAP/Prokka	PGAP	Bakta	Bakta	EggNOG-Mapper	Prokka	Prokka	Bakta	EggNOG-Mapper	EggNOG-Mapper	EggNOG-Mapper
GCA_000458135.1	PGAP	Bakta	Bakta	Prokka	Bakta/PGAP/Prokka	Bakta/PGAP/Prokka	PGAP	Bakta	Bakta	EggNOG-Mapper	Prokka	Prokka	Bakta	EggNOG-Mapper	EggNOG-Mapper	EggNOG-Mapper
GCA_000458155.1	PGAP	Bakta	Bakta	Prokka	Bakta	Bakta/PGAP/Prokka	PGAP	Bakta	Bakta	Prokka	Prokka	Prokka	Bakta	EggNOG-Mapper	EggNOG-Mapper	EggNOG-Mapper
GCA_000458175.1	PGAP	Bakta	Bakta	Prokka	Bakta	Bakta/PGAP/Prokka	PGAP	Bakta	Bakta	EggNOG-Mapper	Prokka	Prokka	Bakta	EggNOG-Mapper	EggNOG-Mapper	EggNOG-Mapper
GCA_000458195.1	Bakta	Bakta	Bakta	Prokka	Bakta	Bakta/PGAP/Prokka	PGAP	Bakta	Bakta	EggNOG-Mapper	Prokka	Prokka	Bakta	EggNOG-Mapper	EggNOG-Mapper	EggNOG-Mapper
GCA_000458215.1	PGAP	Bakta	Bakta	Prokka	Bakta	Bakta/PGAP/Prokka	PGAP	Bakta	Bakta	EggNOG-Mapper	Prokka	Prokka	Bakta	EggNOG-Mapper	EggNOG-Mapper	EggNOG-Mapper
GCA_000458235.1	PGAP	Bakta	Bakta	Prokka	Bakta	Bakta/PGAP/Prokka	PGAP	Bakta	Bakta	EggNOG-Mapper	Prokka	Prokka	Bakta	EggNOG-Mapper	EggNOG-Mapper	EggNOG-Mapper
GCA_000458255.1	PGAP	Bakta	Bakta	Bakta/PGAP/Prokka	Bakta	Bakta/PGAP/Prokka	PGAP	Bakta	Bakta	EggNOG-Mapper	Prokka	Prokka	Bakta	EggNOG-Mapper	EggNOG-Mapper	EggNOG-Mapper
GCA_000458275.1	PGAP	Bakta	Bakta	Prokka	Bakta/PGAP/Prokka	Bakta/PGAP/Prokka	PGAP	Bakta	Bakta	EggNOG-Mapper	Prokka	Prokka	Bakta	EggNOG-Mapper	EggNOG-Mapper	EggNOG-Mapper
GCA_000458295.1	PGAP	Bakta	Bakta	Bakta/Prokka	Bakta	Bakta/PGAP/Prokka	Bakta	Bakta	Bakta	EggNOG-Mapper	Prokka	EggNOG-Mapper	Bakta	EggNOG-Mapper	EggNOG-Mapper	EggNOG-Mapper
GCA_000458315.1	PGAP	Bakta	Bakta	PGAP	Bakta	Bakta/PGAP/Prokka	PGAP	Bakta	Bakta	EggNOG-Mapper	Prokka	Prokka	Bakta	EggNOG-Mapper	EggNOG-Mapper	EggNOG-Mapper
GCA_000458335.1	PGAP	Bakta	Bakta	Prokka	Bakta/PGAP/Prokka	Bakta/PGAP/Prokka	PGAP	Bakta	Bakta	PGAP	Prokka	Prokka	Bakta	EggNOG-Mapper	EggNOG-Mapper	EggNOG-Mapper
GCA_000458355.1	PGAP	Bakta	Bakta	Bakta/PGAP/Prokka	Bakta/PGAP/Prokka	Bakta/PGAP/Prokka	PGAP	Bakta	Bakta	EggNOG-Mapper	Prokka	Prokka	Bakta	EggNOG-Mapper	EggNOG-Mapper	EggNOG-Mapper
GCA_000458375.1	PGAP	Bakta	Bakta	Prokka	Bakta/PGAP/Prokka	Bakta/PGAP/Prokka	PGAP	Bakta	Bakta	EggNOG-Mapper	Prokka	Prokka	Bakta	EggNOG-Mapper	EggNOG-Mapper	EggNOG-Mapper
GCA_000458395.1	PGAP	Bakta	Bakta	Prokka	Bakta/PGAP/Prokka	Bakta/PGAP/Prokka	PGAP	Bakta	Bakta	PGAP	Prokka	Prokka	Bakta	EggNOG-Mapper	EggNOG-Mapper	EggNOG-Mapper
GCA_000458415.1	PGAP	Bakta	Bakta	Bakta/PGAP/Prokka	Bakta	Bakta/PGAP/Prokka	PGAP	Bakta	Bakta	EggNOG-Mapper	Prokka	Prokka	Bakta	EggNOG-Mapper	EggNOG-Mapper	EggNOG-Mapper
GCA_000458435.1	PGAP	Bakta	Bakta	Prokka	Bakta/PGAP/Prokka	Bakta/PGAP/Prokka	PGAP	Bakta	Bakta	EggNOG-Mapper	Prokka	Prokka	Bakta	EggNOG-Mapper	EggNOG-Mapper	EggNOG-Mapper
GCA_000458455.1	PGAP	Bakta	Bakta	Prokka	Bakta	Bakta/PGAP/Prokka	PGAP	Bakta	Bakta	EggNOG-Mapper	Prokka	Prokka	Bakta	EggNOG-Mapper	EggNOG-Mapper	EggNOG-Mapper
GCA_000458475.1	PGAP	Bakta	Bakta	PGAP	Bakta	Bakta/PGAP/Prokka	PGAP	Bakta	Bakta	Prokka	Prokka	Prokka	Bakta	EggNOG-Mapper	EggNOG-Mapper	EggNOG-Mapper
GCA_000458495.1	PGAP	Bakta	Bakta	Bakta/Prokka	Bakta/PGAP/Prokka	Bakta/PGAP/Prokka	PGAP	Bakta	Bakta	EggNOG-Mapper	Prokka	Prokka	Bakta	EggNOG-Mapper	EggNOG-Mapper	EggNOG-Mapper
GCA_000458515.1	PGAP	Bakta	Bakta	Prokka	Bakta	Bakta/PGAP/Prokka	PGAP	Bakta	Bakta	EggNOG-Mapper	Prokka	Prokka	Bakta	EggNOG-Mapper	EggNOG-Mapper	EggNOG-Mapper
GCA_000458535.1	PGAP	Bakta	Bakta	Prokka	Bakta/PGAP/Prokka	Bakta/PGAP/Prokka	PGAP	Bakta	Bakta	EggNOG-Mapper	Prokka	Prokka	Bakta	EggNOG-Mapper	EggNOG-Mapper	EggNOG-Mapper
GCA_000458555.1	PGAP	Bakta	Bakta	Prokka	Bakta	Bakta/PGAP/Prokka	PGAP	Bakta	Bakta	EggNOG-Mapper	Prokka	Prokka	Bakta	EggNOG-Mapper	EggNOG-Mapper	EggNOG-Mapper
GCA_000458575.1	PGAP	Bakta	Bakta	PGAP	Bakta/PGAP/Prokka	Bakta/PGAP/Prokka	PGAP	Bakta	Bakta	PGAP	Prokka	Prokka	Bakta	EggNOG-Mapper	EggNOG-Mapper	EggNOG-Mapper
GCA_000458605.1	PGAP	Bakta	Bakta	Bakta/Prokka	Bakta/PGAP/Prokka	Bakta/PGAP/Prokka	PGAP	Bakta	Bakta	EggNOG-Mapper	Prokka	Prokka	Bakta	EggNOG-Mapper	EggNOG-Mapper	EggNOG-Mapper
GCA_000458625.1	PGAP	Bakta	Bakta	Bakta/Prokka	Bakta	Bakta/PGAP/Prokka	PGAP	Bakta	Bakta	Prokka	Prokka	Prokka	Bakta	EggNOG-Mapper	EggNOG-Mapper	EggNOG-Mapper
GCA_000458645.1	PGAP	Bakta	Bakta	Prokka	Bakta	Bakta/PGAP/Prokka	PGAP	Bakta	Bakta	EggNOG-Mapper	Prokka	Prokka	Bakta	EggNOG-Mapper	EggNOG-Mapper	EggNOG-Mapper
GCA_000458665.1	PGAP	Bakta	Bakta	Prokka	Bakta	Bakta/PGAP/Prokka	PGAP	Bakta	Bakta	EggNOG-Mapper	Prokka	Prokka	Bakta	EggNOG-Mapper	EggNOG-Mapper	EggNOG-Mapper
GCA_000458685.1	PGAP	Bakta	Bakta	Prokka	Bakta	Bakta/PGAP/Prokka	PGAP	Bakta	Bakta	EggNOG-Mapper	Prokka	Prokka	Bakta	EggNOG-Mapper	EggNOG-Mapper	EggNOG-Mapper
GCA_000458705.1	PGAP	Bakta	Bakta	Bakta/PGAP/Prokka	Bakta	Bakta/PGAP/Prokka	PGAP	Bakta	Bakta	EggNOG-Mapper	Prokka	Prokka	Bakta	EggNOG-Mapper	EggNOG-Mapper	EggNOG-Mapper
GCA_000458725.1	PGAP	Bakta	Bakta	Bakta/PGAP/Prokka	Bakta	Bakta/PGAP/Prokka	Bakta	Bakta	Bakta	EggNOG-Mapper	Prokka	Prokka	Bakta	EggNOG-Mapper	EggNOG-Mapper	EggNOG-Mapper
GCA_000458745.1	PGAP	Bakta	Bakta	Bakta/Prokka	Bakta	Bakta/PGAP/Prokka	PGAP	Bakta	Bakta	EggNOG-Mapper	Prokka	Prokka	Bakta	EggNOG-Mapper	EggNOG-Mapper	EggNOG-Mapper
GCA_000458765.1	PGAP	Bakta	Bakta	Prokka	Bakta/PGAP/Prokka	Bakta/PGAP/Prokka	PGAP	Bakta	Bakta	EggNOG-Mapper	Prokka	Prokka	Bakta	EggNOG-Mapper	EggNOG-Mapper	EggNOG-Mapper
GCA_000458785.1	PGAP	Bakta	Bakta	Prokka	Bakta	Bakta/PGAP/Prokka	Bakta	Bakta	Bakta	EggNOG-Mapper	Prokka	EggNOG-Mapper	Bakta	EggNOG-Mapper	EggNOG-Mapper	EggNOG-Mapper
GCA_000458805.1	PGAP	Bakta	Bakta	Bakta/Prokka	Bakta	Bakta/PGAP/Prokka	PGAP	Bakta	Bakta	EggNOG-Mapper	Prokka	Prokka	Bakta	EggNOG-Mapper	EggNOG-Mapper	EggNOG-Mapper
GCA_000458825.1	PGAP	Bakta	Bakta	Prokka	Bakta	Bakta/PGAP/Prokka	PGAP	Bakta	Bakta	EggNOG-Mapper	Prokka	Prokka	Bakta	EggNOG-Mapper	EggNOG-Mapper	EggNOG-Mapper
GCA_000458845.1	PGAP	Bakta	Bakta	PGAP	Bakta	Bakta/PGAP/Prokka	PGAP	Bakta	Bakta	EggNOG-Mapper	Prokka	Prokka	Bakta	EggNOG-Mapper	EggNOG-Mapper	EggNOG-Mapper
GCA_000458875.1	PGAP	Bakta	Bakta	Bakta/PGAP/Prokka	Bakta	Bakta/PGAP/Prokka	PGAP	Bakta	Bakta	EggNOG-Mapper	Prokka	Prokka	Bakta	EggNOG-Mapper	EggNOG-Mapper	EggNOG-Mapper
GCA_000458895.1	PGAP	Bakta	Bakta	Prokka	Bakta/PGAP/Prokka	Bakta/PGAP/Prokka	PGAP	Bakta	Bakta	EggNOG-Mapper	Prokka	Prokka	Bakta	EggNOG-Mapper	EggNOG-Mapper	EggNOG-Mapper
GCA_000458915.1	PGAP	Bakta	Bakta	Prokka	Bakta/PGAP/Prokka	Bakta/PGAP/Prokka	PGAP	Bakta	Bakta	EggNOG-Mapper	Prokka	Prokka	Bakta	EggNOG-Mapper	EggNOG-Mapper	EggNOG-Mapper
GCA_000458935.1	PGAP	Bakta	Bakta	Prokka	Bakta	Bakta/PGAP/Prokka	PGAP	Bakta	Bakta	EggNOG-Mapper	Prokka	Prokka	Bakta	EggNOG-Mapper	EggNOG-Mapper	EggNOG-Mapper
GCA_000458955.1	Bakta	Bakta	Bakta	PGAP/Prokka	Bakta	Bakta/PGAP/Prokka	PGAP	Bakta	Bakta	EggNOG-Mapper	Prokka	Prokka	Bakta	EggNOG-Mapper	EggNOG-Mapper	EggNOG-Mapper
GCA_000458975.1	PGAP	Bakta	Bakta	Prokka	Bakta/PGAP/Prokka	Bakta/PGAP/Prokka	PGAP	Bakta	Bakta	PGAP	Prokka	Prokka	Bakta	EggNOG-Mapper	EggNOG-Mapper	EggNOG-Mapper
GCA_000458995.1	PGAP	Bakta	Bakta	Prokka	Bakta/PGAP/Prokka	Bakta/PGAP/Prokka	PGAP	Bakta	Bakta	EggNOG-Mapper	Prokka	Prokka	Bakta	EggNOG-Mapper	EggNOG-Mapper	EggNOG-Mapper
GCA_000459015.1	PGAP	Bakta	Bakta	Bakta/Prokka	Bakta/PGAP/Prokka	Bakta/PGAP/Prokka	PGAP	Bakta	Bakta	EggNOG-Mapper	Prokka	Prokka	Bakta	EggNOG-Mapper	EggNOG-Mapper	EggNOG-Mapper
GCA_000459035.1	PGAP	Bakta	Bakta	Prokka	Bakta/PGAP/Prokka	Bakta/PGAP/Prokka	PGAP	Bakta	Bakta	EggNOG-Mapper	Prokka	Prokka	Bakta	EggNOG-Mapper	EggNOG-Mapper	EggNOG-Mapper
GCA_000459055.1	PGAP	Bakta	Bakta	Prokka	Bakta	Bakta/PGAP/Prokka	PGAP	Bakta	Bakta	EggNOG-Mapper	Prokka	Prokka	Bakta	EggNOG-Mapper	EggNOG-Mapper	EggNOG-Mapper
GCA_000459075.1	PGAP	Bakta	Bakta	Prokka	Bakta/PGAP/Prokka	Bakta/PGAP/Prokka	PGAP	Bakta	Bakta	PGAP	Prokka	Prokka	Bakta	EggNOG-Mapper	EggNOG-Mapper	EggNOG-Mapper
GCA_000459095.1	PGAP	Bakta	Bakta	PGAP/Prokka	Bakta	Bakta/PGAP/Prokka	PGAP	Bakta	Bakta	EggNOG-Mapper	Prokka	Prokka	Bakta	EggNOG-Mapper	EggNOG-Mapper	EggNOG-Mapper
GCA_000459115.1	PGAP	Bakta	Bakta	Prokka	Bakta/PGAP/Prokka	Bakta/PGAP/Prokka	PGAP	Bakta	Bakta	PGAP	Prokka	Prokka	Bakta	EggNOG-Mapper	EggNOG-Mapper	EggNOG-Mapper
GCA_000459135.1	PGAP	Bakta	Bakta	Prokka	Bakta/PGAP/Prokka	Bakta/PGAP/Prokka	PGAP	Bakta	Bakta	EggNOG-Mapper	Prokka	Prokka	Bakta	EggNOG-Mapper	EggNOG-Mapper	EggNOG-Mapper
GCA_000459155.1	PGAP	Bakta	Bakta	Bakta/Prokka	Bakta	Bakta/PGAP/Prokka	PGAP	Bakta	Bakta	EggNOG-Mapper	Prokka	Prokka	Bakta	EggNOG-Mapper	EggNOG-Mapper	EggNOG-Mapper
GCA_000459175.1	Bakta/PGAP	Bakta	Bakta	Bakta/PGAP/Prokka	Bakta	Bakta/PGAP/Prokka	PGAP	Bakta	Bakta	Prokka	Prokka	Prokka	Bakta	EggNOG-Mapper	EggNOG-Mapper	EggNOG-Mapper
GCA_000459195.1	PGAP	Bakta	Bakta	Prokka	Bakta/PGAP/Prokka	Bakta/PGAP/Prokka	PGAP	Bakta	Bakta	EggNOG-Mapper	Prokka	Prokka	Bakta	EggNOG-Mapper	EggNOG-Mapper	EggNOG-Mapper
GCA_000459215.1	PGAP	Bakta	Bakta	PGAP	Bakta	Bakta/PGAP/Prokka	PGAP	Bakta	Bakta	Prokka	Prokka	Prokka	Bakta	EggNOG-Mapper	EggNOG-Mapper	EggNOG-Mapper
GCA_000459235.1	PGAP	Bakta	Bakta	Prokka	Bakta/PGAP/Prokka	Bakta/PGAP/Prokka	PGAP	Bakta	Bakta	EggNOG-Mapper	Prokka	Prokka	Bakta	EggNOG-Mapper	EggNOG-Mapper	EggNOG-Mapper
GCA_000459255.1	PGAP	Bakta	Bakta	Prokka	Bakta/PGAP/Prokka	Bakta/PGAP/Prokka	PGAP	Bakta	Bakta	PGAP	Prokka	Prokka	Bakta	EggNOG-Mapper	EggNOG-Mapper	EggNOG-Mapper
GCA_000459275.1	PGAP	Bakta	Bakta	PGAP	Bakta	Bakta/PGAP/Prokka	PGAP	Bakta	Bakta	EggNOG-Mapper	Prokka	Prokka	Bakta	EggNOG-Mapper	EggNOG-Mapper	EggNOG-Mapper
GCA_000459295.1	PGAP	Bakta	Bakta	PGAP	Bakta/PGAP/Prokka	Bakta/PGAP/Prokka	PGAP	Bakta	Bakta	PGAP	Prokka	Prokka	Bakta	EggNOG-Mapper	EggNOG-Mapper	EggNOG-Mapper
GCA_000459315.1	PGAP	Bakta	Bakta	Prokka	Bakta/PGAP/Prokka	Bakta/PGAP/Prokka	PGAP	Bakta	Bakta	EggNOG-Mapper	Prokka	Prokka	Bakta	EggNOG-Mapper	EggNOG-Mapper	EggNOG-Mapper
GCA_000459335.1	PGAP	Bakta	Bakta	Bakta/PGAP/Prokka	Bakta	Bakta/PGAP/Prokka	PGAP	Bakta	Bakta	Prokka	Prokka	Prokka	Bakta	EggNOG-Mapper	EggNOG-Mapper	EggNOG-Mapper
GCA_000459355.1	PGAP	Bakta	Bakta	Prokka	Bakta	Bakta/PGAP/Prokka	PGAP	Bakta	Bakta	PGAP	Prokka	Prokka	Bakta	EggNOG-Mapper	EggNOG-Mapper	EggNOG-Mapper
GCA_000459375.1	PGAP	Bakta	Bakta	Prokka	Bakta	Bakta/PGAP/Prokka	PGAP	Bakta	Bakta	EggNOG-Mapper	Prokka	Prokka	Bakta	EggNOG-Mapper	EggNOG-Mapper	EggNOG-Mapper
GCA_000459395.1	PGAP	Bakta	Bakta	Prokka	Bakta/PGAP/Prokka	Bakta/PGAP/Prokka	PGAP	Bakta	Bakta	PGAP	Prokka	Prokka	Bakta	EggNOG-Mapper	EggNOG-Mapper	EggNOG-Mapper
GCA_000459415.1	PGAP	Bakta	Bakta	Prokka	Bakta/PGAP/Prokka	Bakta/PGAP/Prokka	PGAP	Bakta	Bakta	PGAP	Prokka	Prokka	Bakta	EggNOG-Mapper	EggNOG-Mapper	EggNOG-Mapper
GCA_000459435.1	PGAP	Bakta	Bakta	Bakta/Prokka	Bakta	Bakta/PGAP/Prokka	PGAP	Bakta	Bakta	EggNOG-Mapper	Prokka	Prokka	Bakta	EggNOG-Mapper	EggNOG-Mapper	EggNOG-Mapper
GCA_000459455.1	PGAP	Bakta	Bakta	PGAP	Bakta	Bakta/PGAP/Prokka	PGAP	Bakta	Bakta	EggNOG-Mapper	Prokka	Prokka	Bakta	EggNOG-Mapper	EggNOG-Mapper	EggNOG-Mapper
GCA_000459475.1	PGAP	Bakta	Bakta	PGAP	Bakta	Bakta/PGAP/Prokka	PGAP	Bakta	Bakta	EggNOG-Mapper	Prokka	Prokka	Bakta	EggNOG-Mapper	EggNOG-Mapper	EggNOG-Mapper
GCA_000459495.1	PGAP	Bakta	Bakta	PGAP	Bakta/PGAP/Prokka	Bakta/PGAP/Prokka	PGAP	Bakta	Bakta	EggNOG-Mapper	Prokka	Prokka	Bakta	EggNOG-Mapper	EggNOG-Mapper	EggNOG-Mapper
GCA_000459515.1	PGAP	Bakta	Bakta	Bakta/PGAP/Prokka	Bakta	Bakta/PGAP/Prokka	PGAP	Bakta	Bakta	EggNOG-Mapper	Prokka	Prokka	Bakta	EggNOG-Mapper	EggNOG-Mapper	EggNOG-Mapper
GCA_000459535.1	PGAP	Bakta	Bakta	Bakta/PGAP/Prokka	Bakta/PGAP/Prokka	Bakta/PGAP/Prokka	PGAP	Bakta	Bakta	PGAP	Prokka	Prokka	Bakta	EggNOG-Mapper	EggNOG-Mapper	EggNOG-Mapper
GCA_000459555.1	PGAP	Bakta	Bakta	Prokka	Bakta	Bakta/PGAP/Prokka	PGAP	Bakta	Bakta	EggNOG-Mapper	Prokka	Prokka	Bakta	EggNOG-Mapper	EggNOG-Mapper	EggNOG-Mapper
GCA_000459575.1	PGAP	Bakta	Bakta	PGAP	Bakta	Bakta/PGAP/Prokka	PGAP	Bakta	Bakta	PGAP	Prokka	Prokka	Bakta	EggNOG-Mapper	EggNOG-Mapper	EggNOG-Mapper
GCA_000459595.1	PGAP	Bakta	Bakta	Prokka	Bakta	Bakta/PGAP/Prokka	PGAP	Bakta	Bakta	EggNOG-Mapper	Prokka	Prokka	Bakta	EggNOG-Mapper	EggNOG-Mapper	EggNOG-Mapper
GCA_000459615.1	PGAP	Bakta	Bakta	Prokka	Bakta/PGAP/Prokka	Bakta/PGAP/Prokka	PGAP	Bakta	Bakta	PGAP	Prokka	Prokka	Bakta	EggNOG-Mapper	EggNOG-Mapper	EggNOG-Mapper
GCA_000459635.1	PGAP	Bakta	Bakta	Prokka	Bakta	Bakta/PGAP/Prokka	PGAP	Bakta	Bakta	PGAP	Prokka	Prokka	Bakta	EggNOG-Mapper	EggNOG-Mapper	EggNOG-Mapper
GCA_000459655.1	PGAP	Bakta	Bakta	PGAP	Bakta	Bakta/PGAP/Prokka	PGAP	Bakta	Bakta	PGAP	Prokka	Prokka	Bakta	EggNOG-Mapper	EggNOG-Mapper	EggNOG-Mapper
GCA_000459675.1	PGAP	Bakta	Bakta	Prokka	Bakta/PGAP/Prokka	Bakta/PGAP/Prokka	PGAP	Bakta	Bakta	EggNOG-Mapper	Prokka	Prokka	Bakta	EggNOG-Mapper	EggNOG-Mapper	EggNOG-Mapper
GCA_000459695.1	PGAP	Bakta	Bakta	Bakta/PGAP/Prokka	Bakta/PGAP/Prokka	Bakta/PGAP/Prokka	PGAP	Bakta	Bakta	PGAP	Prokka	Prokka	Bakta	EggNOG-Mapper	EggNOG-Mapper	EggNOG-Mapper
GCA_000459715.1	PGAP	Bakta	Bakta	Prokka	Bakta/PGAP/Prokka	Bakta/PGAP/Prokka	PGAP	Bakta	Bakta	EggNOG-Mapper	Prokka	Prokka	Bakta	EggNOG-Mapper	EggNOG-Mapper	EggNOG-Mapper
GCA_000459735.1	PGAP	Bakta	Bakta	Prokka	Bakta/PGAP/Prokka	Bakta/PGAP/Prokka	PGAP	Bakta	Bakta	EggNOG-Mapper	Prokka	Prokka	Bakta	EggNOG-Mapper	EggNOG-Mapper	EggNOG-Mapper
GCA_000459755.1	PGAP	Bakta	Bakta	Prokka	Bakta/PGAP/Prokka	Bakta/PGAP/Prokka	PGAP	Bakta	Bakta	EggNOG-Mapper	Prokka	Prokka	Bakta	EggNOG-Mapper	EggNOG-Mapper	EggNOG-Mapper
GCA_000459775.1	PGAP	Bakta	Bakta	Prokka	Bakta/PGAP/Prokka	Bakta/PGAP/Prokka	PGAP	Bakta	Bakta	PGAP	Prokka	Prokka	Bakta	EggNOG-Mapper	EggNOG-Mapper	EggNOG-Mapper
GCA_000459795.1	PGAP	Bakta	Bakta	Bakta/PGAP/Prokka	Bakta	Bakta/PGAP/Prokka	PGAP	Bakta	Bakta	EggNOG-Mapper	Prokka	Prokka	Bakta	EggNOG-Mapper	EggNOG-Mapper	EggNOG-Mapper
GCA_000459815.1	PGAP	Bakta	Bakta	Bakta/PGAP/Prokka	Bakta	Bakta/PGAP/Prokka	Bakta	Bakta	Bakta	EggNOG-Mapper	Prokka	EggNOG-Mapper	Bakta	EggNOG-Mapper	EggNOG-Mapper	EggNOG-Mapper
GCA_000459835.1	PGAP	Bakta	Bakta	Bakta/Prokka	Bakta	Bakta/PGAP/Prokka	PGAP	Bakta	Bakta	EggNOG-Mapper	Prokka	Prokka	Bakta	EggNOG-Mapper	EggNOG-Mapper	EggNOG-Mapper
GCA_000459855.1	PGAP	Bakta	Bakta	PGAP/Prokka	Bakta	Bakta/PGAP/Prokka	PGAP	Bakta	Bakta	EggNOG-Mapper	Prokka	Prokka	EggNOG-Mapper	EggNOG-Mapper	EggNOG-Mapper	EggNOG-Mapper
GCA_000459875.1	PGAP	Bakta	Bakta	Prokka	Bakta	Bakta/PGAP/Prokka	PGAP	Bakta	Bakta	EggNOG-Mapper	Prokka	Prokka	Bakta	EggNOG-Mapper	EggNOG-Mapper	EggNOG-Mapper
GCA_000459895.1	PGAP	Bakta	Bakta	Prokka	Bakta	Bakta/PGAP/Prokka	PGAP	Bakta	Bakta	EggNOG-Mapper	Prokka	Prokka	Bakta	EggNOG-Mapper	EggNOG-Mapper	EggNOG-Mapper
GCA_000459915.1	PGAP	Bakta	Bakta	Prokka	Bakta	Bakta/PGAP/Prokka	Bakta	Bakta	Bakta	EggNOG-Mapper	Prokka	Prokka	Bakta	EggNOG-Mapper	EggNOG-Mapper	EggNOG-Mapper
GCA_000459935.1	PGAP	Bakta	Bakta	PGAP/Prokka	Bakta	Bakta/PGAP/Prokka	PGAP	Bakta	Bakta	EggNOG-Mapper	Prokka	Prokka	Bakta	EggNOG-Mapper	EggNOG-Mapper	EggNOG-Mapper
GCA_000459955.1	PGAP	Bakta	Bakta	Bakta/Prokka	Bakta	Bakta/PGAP/Prokka	PGAP	Bakta	Bakta	EggNOG-Mapper	Prokka	Prokka	Bakta	EggNOG-Mapper	EggNOG-Mapper	EggNOG-Mapper
GCA_000459975.1	PGAP	Bakta	Bakta	Prokka	Bakta/PGAP/Prokka	Bakta/PGAP/Prokka	PGAP	Bakta	Bakta	EggNOG-Mapper	Prokka	Prokka	Bakta	EggNOG-Mapper	EggNOG-Mapper	EggNOG-Mapper
GCA_000459995.1	PGAP	Bakta	Bakta	Prokka	Bakta/PGAP/Prokka	Bakta/PGAP/Prokka	PGAP	Bakta	Bakta	EggNOG-Mapper	Prokka	Prokka	Bakta	EggNOG-Mapper	EggNOG-Mapper	EggNOG-Mapper
GCA_000460015.1	PGAP	Bakta	Bakta	Prokka	Bakta	Bakta/PGAP/Prokka	Bakta	Bakta	Bakta	EggNOG-Mapper	Prokka	Prokka	Bakta	EggNOG-Mapper	EggNOG-Mapper	EggNOG-Mapper
GCA_000460035.1	PGAP	Bakta	Bakta	Bakta/PGAP/Prokka	Bakta/PGAP/Prokka	Bakta/PGAP/Prokka	PGAP	Bakta	Bakta	EggNOG-Mapper	Prokka	Prokka	Bakta	EggNOG-Mapper	EggNOG-Mapper	EggNOG-Mapper
GCA_000460055.1	PGAP	Bakta	Bakta	PGAP/Prokka	Bakta/PGAP/Prokka	Bakta/PGAP/Prokka	PGAP	Bakta	Bakta	EggNOG-Mapper	Prokka	Prokka	Bakta	EggNOG-Mapper	EggNOG-Mapper	EggNOG-Mapper
GCA_000460075.1	PGAP	Bakta	Bakta	Prokka	Bakta	Bakta/PGAP/Prokka	PGAP	Bakta	Bakta	EggNOG-Mapper	Prokka	Prokka	Bakta	EggNOG-Mapper	EggNOG-Mapper	EggNOG-Mapper
GCA_000460095.1	PGAP	Bakta	Bakta	Prokka	Bakta/PGAP/Prokka	Bakta/PGAP/Prokka	PGAP	Bakta	Bakta	EggNOG-Mapper	Prokka	Prokka	Bakta	EggNOG-Mapper	EggNOG-Mapper	EggNOG-Mapper
GCA_000460115.1	PGAP	Bakta	Bakta	Prokka	Bakta/PGAP/Prokka	Bakta/PGAP/Prokka	PGAP	Bakta	Bakta	EggNOG-Mapper	Prokka	Prokka	Bakta	EggNOG-Mapper	EggNOG-Mapper	EggNOG-Mapper
GCA_000460135.1	PGAP	Bakta	Bakta	Prokka	Bakta/PGAP/Prokka	Bakta/PGAP/Prokka	PGAP	Bakta	Bakta	EggNOG-Mapper	Prokka	Prokka	Bakta	EggNOG-Mapper	EggNOG-Mapper	EggNOG-Mapper
GCA_000460155.1	PGAP	Bakta	Bakta	PGAP/Prokka	Bakta/PGAP/Prokka	Bakta/PGAP/Prokka	PGAP	Bakta	Bakta	EggNOG-Mapper	Prokka	Prokka	Bakta	EggNOG-Mapper	EggNOG-Mapper	EggNOG-Mapper
GCA_000460175.1	PGAP	Bakta	Bakta	PGAP/Prokka	Bakta/PGAP/Prokka	Bakta/PGAP/Prokka	PGAP	Bakta	Bakta	EggNOG-Mapper	Prokka	Prokka	Bakta	EggNOG-Mapper	EggNOG-Mapper	EggNOG-Mapper
GCA_000460195.1	PGAP	Bakta	Bakta	Bakta/Prokka	Bakta/PGAP/Prokka	Bakta/PGAP/Prokka	PGAP	Bakta	Bakta	EggNOG-Mapper	Prokka	Prokka	Bakta	EggNOG-Mapper	EggNOG-Mapper	EggNOG-Mapper
GCA_000460215.1	PGAP	Bakta	Bakta	Bakta/Prokka	Bakta	Bakta/PGAP/Prokka	PGAP	Bakta	Bakta	EggNOG-Mapper	Prokka	Prokka	Bakta	EggNOG-Mapper	EggNOG-Mapper	EggNOG-Mapper
GCA_000460235.1	PGAP	Bakta	Bakta	Bakta/PGAP/Prokka	Bakta	Bakta/PGAP/Prokka	PGAP	Bakta	Bakta	EggNOG-Mapper	Prokka	Prokka	Bakta	EggNOG-Mapper	EggNOG-Mapper	EggNOG-Mapper
GCA_000460255.1	Bakta	Bakta	Bakta	Prokka	Bakta/PGAP/Prokka	Bakta/PGAP/Prokka	PGAP	Bakta	Bakta	EggNOG-Mapper	Prokka	Prokka	Bakta	EggNOG-Mapper	EggNOG-Mapper	EggNOG-Mapper
GCA_000460275.1	PGAP	Bakta	Bakta	Bakta/PGAP/Prokka	Bakta/PGAP/Prokka	Bakta/PGAP/Prokka	PGAP	Bakta	Bakta	EggNOG-Mapper	Prokka	Prokka	Bakta	EggNOG-Mapper	EggNOG-Mapper	EggNOG-Mapper
GCA_000460295.1	PGAP	Bakta	Bakta	Prokka	Bakta/PGAP/Prokka	Bakta/PGAP/Prokka	PGAP	Bakta	Bakta	EggNOG-Mapper	Prokka	Prokka	Bakta	EggNOG-Mapper	EggNOG-Mapper	EggNOG-Mapper
GCA_000460315.1	PGAP	Bakta	Bakta	Prokka	Bakta	Bakta/PGAP/Prokka	PGAP	Bakta	Bakta	EggNOG-Mapper	Prokka	Prokka	Bakta	EggNOG-Mapper	EggNOG-Mapper	EggNOG-Mapper
GCA_000460335.1	PGAP	Bakta	Bakta	Prokka	Bakta	Bakta/PGAP/Prokka	PGAP	Bakta	Bakta	EggNOG-Mapper	Prokka	Prokka	Bakta	EggNOG-Mapper	EggNOG-Mapper	EggNOG-Mapper
GCA_000460355.1	PGAP	Bakta	Bakta	Bakta/Prokka	Bakta/PGAP/Prokka	Bakta/PGAP/Prokka	PGAP	Bakta	Bakta	PGAP	Prokka	Prokka	Bakta	EggNOG-Mapper	EggNOG-Mapper	EggNOG-Mapper
GCA_000460375.1	PGAP	Bakta	Bakta	Bakta/PGAP/Prokka	Bakta	Bakta/PGAP/Prokka	PGAP	Bakta	Bakta	Prokka	Prokka	Prokka	Bakta	EggNOG-Mapper	EggNOG-Mapper	EggNOG-Mapper
GCA_000460395.1	PGAP	Bakta	Bakta	Prokka	Bakta	Bakta/PGAP/Prokka	PGAP	Bakta	Bakta	EggNOG-Mapper	Prokka	Prokka	Bakta	EggNOG-Mapper	EggNOG-Mapper	EggNOG-Mapper
GCA_000460415.1	PGAP	Bakta	Bakta	Bakta/PGAP/Prokka	Bakta/PGAP/Prokka	Bakta/PGAP/Prokka	PGAP	Bakta	Bakta	EggNOG-Mapper	Prokka	Prokka	Bakta	EggNOG-Mapper	EggNOG-Mapper	EggNOG-Mapper
GCA_000460435.1	PGAP	Bakta	Bakta	PGAP	Bakta/PGAP/Prokka	Bakta/PGAP/Prokka	PGAP	Bakta	Bakta	EggNOG-Mapper	Prokka	Prokka	Bakta	EggNOG-Mapper	EggNOG-Mapper	EggNOG-Mapper
GCA_000460455.1	PGAP	Bakta	Bakta	PGAP	Bakta/PGAP/Prokka	Bakta/PGAP/Prokka	PGAP	Bakta	Bakta	PGAP	Prokka	Prokka	Bakta	EggNOG-Mapper	EggNOG-Mapper	EggNOG-Mapper
GCA_000460475.1	PGAP	Bakta	Bakta	PGAP	Bakta	Bakta/PGAP/Prokka	PGAP	Bakta	Bakta	EggNOG-Mapper	Prokka	Prokka	Bakta	EggNOG-Mapper	EggNOG-Mapper	EggNOG-Mapper
GCA_000460495.1	PGAP	Bakta	Bakta	Prokka	Bakta/PGAP/Prokka	Bakta/PGAP/Prokka	PGAP	Bakta	Bakta	EggNOG-Mapper	Prokka	Prokka	Bakta	EggNOG-Mapper	EggNOG-Mapper	EggNOG-Mapper
GCA_000460515.1	PGAP	Bakta	Bakta	Bakta/PGAP/Prokka	Bakta/PGAP/Prokka	Bakta/PGAP/Prokka	PGAP	Bakta	Bakta	EggNOG-Mapper	Prokka	Prokka	Bakta	EggNOG-Mapper	EggNOG-Mapper	EggNOG-Mapper
GCA_000460535.1	PGAP	Bakta	Bakta	PGAP	Bakta/PGAP/Prokka	Bakta/PGAP/Prokka	PGAP	Bakta	Bakta	EggNOG-Mapper	Prokka	Prokka	Bakta	EggNOG-Mapper	EggNOG-Mapper	EggNOG-Mapper
GCA_000460555.1	PGAP	Bakta	Bakta	Prokka	Bakta	Bakta/PGAP/Prokka	PGAP	Bakta	Bakta	EggNOG-Mapper	Prokka	Prokka	Bakta	Bakta	EggNOG-Mapper	EggNOG-Mapper
GCA_000460575.1	PGAP	Bakta	Bakta	Bakta/PGAP/Prokka	Bakta/PGAP/Prokka	Bakta/PGAP/Prokka	PGAP	Bakta	Bakta	EggNOG-Mapper	Prokka	Prokka	Bakta	EggNOG-Mapper	EggNOG-Mapper	EggNOG-Mapper
GCA_000460595.1	PGAP	Bakta	Bakta	Bakta/PGAP/Prokka	Bakta	Bakta/PGAP/Prokka	PGAP	Bakta	Bakta	EggNOG-Mapper	Prokka	Prokka	Bakta	EggNOG-Mapper	EggNOG-Mapper	EggNOG-Mapper
GCA_000460615.1	PGAP	Bakta	Bakta	Prokka	Bakta	Bakta/PGAP/Prokka	PGAP	Bakta	Bakta	EggNOG-Mapper	Prokka	Prokka	Bakta	EggNOG-Mapper	EggNOG-Mapper	EggNOG-Mapper
GCA_000460635.1	PGAP	Bakta	Bakta	Prokka	Bakta	Bakta/PGAP/Prokka	PGAP	Bakta	Bakta	EggNOG-Mapper	Prokka	Prokka	Bakta	EggNOG-Mapper	EggNOG-Mapper	EggNOG-Mapper
GCA_000460655.1	PGAP	Bakta	Bakta	Prokka	Bakta	Bakta/PGAP/Prokka	PGAP	Bakta	Bakta	EggNOG-Mapper	Prokka	Prokka	Bakta	EggNOG-Mapper	EggNOG-Mapper	EggNOG-Mapper
GCA_000460675.1	PGAP	Bakta	Bakta	Bakta/Prokka	Bakta	Bakta/PGAP/Prokka	PGAP	Bakta	Bakta	EggNOG-Mapper	Prokka	Prokka	Bakta	EggNOG-Mapper	EggNOG-Mapper	EggNOG-Mapper
GCA_000460695.1	PGAP	Bakta	Bakta	PGAP	Bakta	Bakta/PGAP/Prokka	PGAP	Bakta	Bakta	EggNOG-Mapper	Prokka	Prokka	Bakta	EggNOG-Mapper	EggNOG-Mapper	EggNOG-Mapper
GCA_000460715.1	PGAP	Bakta	Bakta	Bakta/Prokka	Bakta/PGAP/Prokka	Bakta/PGAP/Prokka	PGAP	Bakta	Bakta	EggNOG-Mapper	Prokka	Prokka	Bakta	EggNOG-Mapper	EggNOG-Mapper	EggNOG-Mapper
GCA_000460735.1	PGAP	Bakta	Bakta	Prokka	Bakta	Bakta/PGAP/Prokka	Bakta	Bakta	Bakta	EggNOG-Mapper	Prokka	Prokka	Bakta	EggNOG-Mapper	EggNOG-Mapper	EggNOG-Mapper
GCA_000460755.1	PGAP	Bakta	Bakta	Prokka	Bakta	Bakta/PGAP/Prokka	PGAP	Bakta	Bakta	EggNOG-Mapper	Prokka	Prokka	Bakta	EggNOG-Mapper	EggNOG-Mapper	EggNOG-Mapper
GCA_000460775.1	PGAP	Bakta	Bakta	Prokka	Bakta/PGAP/Prokka	Bakta/PGAP/Prokka	PGAP	Bakta	Bakta	EggNOG-Mapper	Prokka	Prokka	Bakta	EggNOG-Mapper	EggNOG-Mapper	EggNOG-Mapper
GCA_000460795.1	PGAP	Bakta	Bakta	Prokka	Bakta/PGAP/Prokka	Bakta/PGAP/Prokka	PGAP	Bakta	Bakta	EggNOG-Mapper	Prokka	Prokka	Bakta	EggNOG-Mapper	EggNOG-Mapper	EggNOG-Mapper
GCA_000460815.1	PGAP	Bakta	Bakta	Prokka	Bakta/PGAP/Prokka	Bakta/PGAP/Prokka	PGAP	Bakta	Bakta	EggNOG-Mapper	Prokka	Prokka	Bakta	EggNOG-Mapper	EggNOG-Mapper	EggNOG-Mapper
GCA_000460835.1	PGAP	Bakta	Bakta	Prokka	Bakta/PGAP/Prokka	Bakta/PGAP/Prokka	PGAP	Bakta	Bakta	EggNOG-Mapper	Prokka	Prokka	Bakta	EggNOG-Mapper	EggNOG-Mapper	EggNOG-Mapper
GCA_000460855.1	PGAP	Bakta	Bakta	Prokka	Bakta/PGAP/Prokka	Bakta/PGAP/Prokka	PGAP	Bakta	Bakta	EggNOG-Mapper	Prokka	Prokka	Bakta	EggNOG-Mapper	EggNOG-Mapper	EggNOG-Mapper
GCA_000460875.1	PGAP	Bakta	Bakta	Bakta/PGAP/Prokka	Bakta/PGAP/Prokka	Bakta/PGAP/Prokka	PGAP	Bakta	Bakta	EggNOG-Mapper	Prokka	Prokka	Bakta	EggNOG-Mapper	EggNOG-Mapper	EggNOG-Mapper
GCA_000460895.1	PGAP	Bakta	Bakta	Prokka	Bakta/PGAP/Prokka	Bakta/PGAP/Prokka	PGAP	Bakta	Bakta	EggNOG-Mapper	Prokka	Prokka	Bakta	EggNOG-Mapper	EggNOG-Mapper	EggNOG-Mapper
GCA_000460915.1	PGAP	Bakta	Bakta	Bakta/PGAP/Prokka	Bakta/PGAP/Prokka	Bakta/PGAP/Prokka	PGAP	Bakta	Bakta	PGAP	Prokka	Prokka	Bakta	EggNOG-Mapper	EggNOG-Mapper	EggNOG-Mapper
GCA_000460935.1	PGAP	Bakta	Bakta	Prokka	Bakta	Bakta/PGAP/Prokka	PGAP	Bakta	Bakta	EggNOG-Mapper	Prokka	Prokka	Bakta	EggNOG-Mapper	EggNOG-Mapper	EggNOG-Mapper
GCA_000460955.1	PGAP	Bakta	Bakta	Bakta/PGAP/Prokka	Bakta	Bakta/PGAP/Prokka	PGAP	Bakta	Bakta	EggNOG-Mapper	Prokka	Prokka	Bakta	EggNOG-Mapper	EggNOG-Mapper	EggNOG-Mapper
GCA_000460975.1	PGAP	Bakta	Bakta	Bakta/PGAP/Prokka	Bakta	Bakta/PGAP/Prokka	PGAP	Bakta	Bakta	EggNOG-Mapper	Prokka	Prokka	Bakta	EggNOG-Mapper	EggNOG-Mapper	EggNOG-Mapper
GCA_000460995.1	PGAP	Bakta	Bakta	Prokka	Bakta/PGAP/Prokka	Bakta/PGAP/Prokka	PGAP	Bakta	Bakta	EggNOG-Mapper	Prokka	Prokka	Bakta	EggNOG-Mapper	EggNOG-Mapper	EggNOG-Mapper
GCA_000461015.1	PGAP	Bakta	Bakta	Prokka	Bakta	Bakta/PGAP/Prokka	PGAP	Bakta	Bakta	EggNOG-Mapper	Prokka	Prokka	Bakta	EggNOG-Mapper	EggNOG-Mapper	EggNOG-Mapper
GCA_000461035.1	PGAP	Bakta	Bakta	PGAP	Bakta/PGAP/Prokka	Bakta/PGAP/Prokka	PGAP	Bakta	Bakta	PGAP	Prokka	Prokka	Bakta	EggNOG-Mapper	EggNOG-Mapper	EggNOG-Mapper
GCA_000461055.1	PGAP	Bakta	Bakta	PGAP	Bakta	Bakta/PGAP/Prokka	PGAP	Bakta	Bakta	EggNOG-Mapper	Prokka	Prokka	Bakta	EggNOG-Mapper	EggNOG-Mapper	EggNOG-Mapper
GCA_000461075.1	PGAP	Bakta	Bakta	Bakta/PGAP/Prokka	Bakta	Bakta/PGAP/Prokka	PGAP	Bakta	Bakta	EggNOG-Mapper	Prokka	Prokka	Bakta	EggNOG-Mapper	EggNOG-Mapper	EggNOG-Mapper
GCA_000461095.1	PGAP	Bakta	Bakta	Bakta/PGAP/Prokka	Bakta	Bakta/PGAP/Prokka	PGAP	Bakta	Bakta	EggNOG-Mapper	Prokka	Prokka	Bakta	EggNOG-Mapper	EggNOG-Mapper	EggNOG-Mapper
GCA_000461115.1	PGAP	Bakta	Bakta	PGAP	Bakta	Bakta/PGAP/Prokka	PGAP	Bakta	Bakta	EggNOG-Mapper	Prokka	Prokka	Bakta	EggNOG-Mapper	EggNOG-Mapper	EggNOG-Mapper
GCA_000461135.1	PGAP	Bakta	Bakta	Prokka	Bakta	Bakta/PGAP/Prokka	PGAP	Bakta	Bakta	EggNOG-Mapper	Prokka	Prokka	Bakta	EggNOG-Mapper	EggNOG-Mapper	EggNOG-Mapper
GCA_000461155.1	PGAP	Bakta	Bakta	Prokka	Bakta/PGAP/Prokka	Bakta/PGAP/Prokka	PGAP	Bakta	Bakta	EggNOG-Mapper	Prokka	Prokka	Bakta	EggNOG-Mapper	EggNOG-Mapper	EggNOG-Mapper
GCA_000461175.1	PGAP	Bakta	Bakta	PGAP	Bakta	Bakta/PGAP/Prokka	PGAP	Bakta	Bakta	EggNOG-Mapper	Prokka	Prokka	Bakta	EggNOG-Mapper	EggNOG-Mapper	EggNOG-Mapper
GCA_000461195.1	PGAP	Bakta	Bakta	Prokka	Bakta/PGAP/Prokka	Bakta/PGAP/Prokka	PGAP	Bakta	Bakta	EggNOG-Mapper	Prokka	Prokka	Bakta	EggNOG-Mapper	EggNOG-Mapper	EggNOG-Mapper
GCA_000461215.1	PGAP	Bakta	Bakta	Prokka	Bakta	Bakta/PGAP/Prokka	PGAP	Bakta	Bakta	EggNOG-Mapper	Prokka	Prokka	Bakta	EggNOG-Mapper	EggNOG-Mapper	EggNOG-Mapper
GCA_000461235.1	PGAP	Bakta	Bakta	PGAP	Bakta	Bakta/PGAP/Prokka	PGAP	Bakta	Bakta	EggNOG-Mapper	Prokka	Prokka	Bakta	EggNOG-Mapper	EggNOG-Mapper	EggNOG-Mapper
GCA_000461255.1	PGAP	Bakta	Bakta	Bakta/Prokka	Bakta	Bakta/PGAP/Prokka	PGAP	Bakta	Bakta	EggNOG-Mapper	Prokka	Prokka	Bakta	Bakta	EggNOG-Mapper	EggNOG-Mapper
GCA_000461275.1	PGAP	Bakta	Bakta	Prokka	Bakta	Bakta/PGAP/Prokka	PGAP	Bakta	Bakta	EggNOG-Mapper	Prokka	Prokka	Bakta	EggNOG-Mapper	EggNOG-Mapper	EggNOG-Mapper
GCA_000461295.1	PGAP	Bakta	Bakta	PGAP/Prokka	Bakta/PGAP/Prokka	Bakta/PGAP/Prokka	PGAP	Bakta	Bakta	Prokka	Prokka	Prokka	Bakta	EggNOG-Mapper	EggNOG-Mapper	EggNOG-Mapper
GCA_000461315.1	PGAP	Bakta	Bakta	Prokka	Bakta	Bakta/PGAP/Prokka	PGAP	Bakta	Bakta	EggNOG-Mapper	Prokka	Prokka	Bakta	EggNOG-Mapper	EggNOG-Mapper	EggNOG-Mapper
GCA_000461335.1	PGAP	Bakta	Bakta	Prokka	Bakta	Bakta/PGAP/Prokka	PGAP	Bakta	Bakta	EggNOG-Mapper	Prokka	Prokka	Bakta	EggNOG-Mapper	EggNOG-Mapper	EggNOG-Mapper
GCA_000461355.1	PGAP	Bakta	Bakta	Prokka	Bakta/PGAP/Prokka	Bakta/PGAP/Prokka	PGAP	Bakta	Bakta	EggNOG-Mapper	Prokka	Prokka	Bakta	EggNOG-Mapper	EggNOG-Mapper	EggNOG-Mapper
GCA_000461375.1	PGAP	Bakta	Bakta	Prokka	Bakta	Bakta/PGAP/Prokka	PGAP	Bakta	Bakta	EggNOG-Mapper	Prokka	Prokka	Bakta	EggNOG-Mapper	EggNOG-Mapper	EggNOG-Mapper
GCA_000461395.1	PGAP	Bakta	Bakta	Prokka	Bakta	Bakta/PGAP/Prokka	PGAP	Bakta	Bakta	EggNOG-Mapper	Prokka	Prokka	Bakta	EggNOG-Mapper	EggNOG-Mapper	EggNOG-Mapper
GCA_000461415.1	PGAP	Bakta	Bakta	Prokka	Bakta	Bakta/PGAP/Prokka	PGAP	Bakta	Bakta	EggNOG-Mapper	Prokka	Prokka	Bakta	EggNOG-Mapper	EggNOG-Mapper	EggNOG-Mapper
GCA_000461435.1	PGAP	Bakta	Bakta	PGAP	Bakta/PGAP/Prokka	Bakta/PGAP/Prokka	PGAP	Bakta	Bakta	EggNOG-Mapper	Prokka	Prokka	Bakta	EggNOG-Mapper	EggNOG-Mapper	EggNOG-Mapper
GCA_000461455.1	PGAP	Bakta	Bakta	Prokka	Bakta	Bakta/PGAP/Prokka	PGAP	Bakta	Bakta	EggNOG-Mapper	Prokka	Prokka	Bakta	EggNOG-Mapper	EggNOG-Mapper	EggNOG-Mapper
GCA_000461475.1	PGAP	Bakta	Bakta	Bakta/PGAP/Prokka	Bakta	Bakta/PGAP/Prokka	PGAP	Bakta	Bakta	PGAP	Prokka	Prokka	Bakta	EggNOG-Mapper	EggNOG-Mapper	EggNOG-Mapper
GCA_000461495.1	PGAP	Bakta	Bakta	Bakta/PGAP/Prokka	Bakta/PGAP/Prokka	Bakta/PGAP/Prokka	PGAP	Bakta	Bakta	EggNOG-Mapper	Prokka	Prokka	Bakta	EggNOG-Mapper	EggNOG-Mapper	EggNOG-Mapper
GCA_000461515.1	PGAP	Bakta	Bakta	PGAP	Bakta	Bakta/PGAP/Prokka	PGAP	Bakta	Bakta	EggNOG-Mapper	Prokka	Prokka	Bakta	EggNOG-Mapper	EggNOG-Mapper	EggNOG-Mapper
GCA_000461535.1	PGAP	Bakta	Bakta	Prokka	Bakta	Bakta/PGAP/Prokka	PGAP	Bakta	Bakta	EggNOG-Mapper	Prokka	Prokka	Bakta	EggNOG-Mapper	EggNOG-Mapper	EggNOG-Mapper
GCA_000461555.1	PGAP	Bakta	Bakta	Prokka	Bakta	Bakta/PGAP/Prokka	PGAP	Bakta	Bakta	EggNOG-Mapper	Prokka	Prokka	Bakta	EggNOG-Mapper	EggNOG-Mapper	EggNOG-Mapper
GCA_000461575.1	PGAP	Bakta	Bakta	Prokka	Bakta	Bakta/PGAP/Prokka	PGAP	Bakta	Bakta	EggNOG-Mapper	Prokka	Prokka	Bakta	EggNOG-Mapper	EggNOG-Mapper	EggNOG-Mapper
GCA_000461595.1	PGAP	Bakta	Bakta	Prokka	Bakta/PGAP/Prokka	Bakta/PGAP/Prokka	PGAP	Bakta	Bakta	EggNOG-Mapper	Prokka	Prokka	Bakta	EggNOG-Mapper	EggNOG-Mapper	EggNOG-Mapper
GCA_000461615.1	PGAP	Bakta	Bakta	Prokka	Bakta	Bakta/PGAP/Prokka	PGAP	Bakta	Bakta	EggNOG-Mapper	Prokka	Prokka	Bakta	EggNOG-Mapper	EggNOG-Mapper	EggNOG-Mapper
GCA_000461635.1	PGAP	Bakta	Bakta	Bakta/Prokka	Bakta	Bakta/PGAP/Prokka	PGAP	Bakta	Bakta	EggNOG-Mapper	Prokka	Prokka	Bakta	EggNOG-Mapper	EggNOG-Mapper	EggNOG-Mapper
GCA_000461655.1	PGAP	Bakta	Bakta	Prokka	Bakta/PGAP/Prokka	Bakta/PGAP/Prokka	PGAP	Bakta	Bakta	EggNOG-Mapper	Prokka	Prokka	Bakta	EggNOG-Mapper	EggNOG-Mapper	EggNOG-Mapper
GCA_000461675.1	PGAP	Bakta	Bakta	Prokka	Bakta	Bakta/PGAP/Prokka	Bakta	Bakta	Bakta	EggNOG-Mapper	Prokka	Prokka	Bakta	EggNOG-Mapper	EggNOG-Mapper	EggNOG-Mapper
GCA_000461695.1	PGAP	Bakta	Bakta	PGAP	Bakta/PGAP/Prokka	Bakta/PGAP/Prokka	PGAP	Bakta	Bakta	EggNOG-Mapper	Prokka	Prokka	Bakta	EggNOG-Mapper	EggNOG-Mapper	EggNOG-Mapper
GCA_000461715.1	PGAP	Bakta	Bakta	Bakta/PGAP/Prokka	Bakta/PGAP/Prokka	Bakta/PGAP/Prokka	PGAP	Bakta	Bakta	EggNOG-Mapper	Prokka	Prokka	Bakta	EggNOG-Mapper	EggNOG-Mapper	EggNOG-Mapper
GCA_000461735.1	PGAP	Bakta	Bakta	Prokka	Bakta	Bakta/PGAP/Prokka	PGAP	Bakta	Bakta	EggNOG-Mapper	Prokka	Prokka	Bakta	EggNOG-Mapper	EggNOG-Mapper	EggNOG-Mapper
GCA_000461755.1	PGAP	Bakta	Bakta	Prokka	Bakta	Bakta/PGAP/Prokka	PGAP	Bakta	Bakta	EggNOG-Mapper	Prokka	Prokka	Bakta	EggNOG-Mapper	EggNOG-Mapper	EggNOG-Mapper
GCA_000461775.1	PGAP	Bakta	Bakta	Prokka	Bakta	Bakta/PGAP/Prokka	PGAP	Bakta	Bakta	EggNOG-Mapper	Prokka	Prokka	Bakta	EggNOG-Mapper	EggNOG-Mapper	EggNOG-Mapper
GCA_000461795.1	PGAP	Bakta	Bakta	Prokka	Bakta	Bakta/PGAP/Prokka	PGAP	Bakta	Bakta	EggNOG-Mapper	Prokka	Prokka	Bakta	EggNOG-Mapper	EggNOG-Mapper	EggNOG-Mapper
GCA_000461815.1	PGAP	Bakta	Bakta	PGAP	Bakta	Bakta/PGAP/Prokka	PGAP	Bakta	Bakta	EggNOG-Mapper	Prokka	Prokka	Bakta	EggNOG-Mapper	EggNOG-Mapper	EggNOG-Mapper
GCA_000461835.1	PGAP	Bakta	Bakta	Bakta/PGAP/Prokka	Bakta/PGAP/Prokka	Bakta/PGAP/Prokka	PGAP	Bakta	Bakta	EggNOG-Mapper	Prokka	Prokka	Bakta	EggNOG-Mapper	EggNOG-Mapper	EggNOG-Mapper
GCA_000461855.1	PGAP	Bakta	Bakta	PGAP/Prokka	Bakta	Bakta/PGAP/Prokka	PGAP	Bakta	Bakta	EggNOG-Mapper	Prokka	Prokka	Bakta	EggNOG-Mapper	EggNOG-Mapper	EggNOG-Mapper
GCA_000461875.1	PGAP	Bakta	Bakta	PGAP	Bakta/PGAP/Prokka	Bakta/PGAP/Prokka	PGAP	Bakta	Bakta	EggNOG-Mapper	Prokka	Prokka	Bakta	EggNOG-Mapper	EggNOG-Mapper	EggNOG-Mapper
GCA_000461915.2	PGAP	Bakta	Bakta	PGAP	Bakta	Bakta/PGAP/Prokka	PGAP	Bakta	Bakta	Prokka	Prokka	Prokka	Bakta	EggNOG-Mapper	EggNOG-Mapper	EggNOG-Mapper
GCA_000461935.2	PGAP	Bakta	Bakta	PGAP	Bakta	Bakta/PGAP/Prokka	PGAP	Bakta	Bakta	Prokka	Prokka	Prokka	Bakta	EggNOG-Mapper	EggNOG-Mapper	EggNOG-Mapper
GCA_000461955.2	PGAP	Bakta	Bakta	Bakta/PGAP/Prokka	Bakta	Bakta/PGAP/Prokka	PGAP	Bakta	Bakta	Prokka	Prokka	Prokka	Bakta	EggNOG-Mapper	EggNOG-Mapper	EggNOG-Mapper
GCA_000461975.2	PGAP	Bakta	Bakta	Bakta/PGAP/Prokka	Bakta	Bakta/PGAP/Prokka	PGAP	Bakta	Bakta	Prokka	Prokka	Prokka	Bakta	EggNOG-Mapper	EggNOG-Mapper	EggNOG-Mapper
GCA_000461995.2	PGAP	Bakta	Bakta	PGAP	Bakta	Bakta/PGAP/Prokka	PGAP	Bakta	Bakta	Prokka	Prokka	Prokka	Bakta	EggNOG-Mapper	EggNOG-Mapper	EggNOG-Mapper
GCA_000462025.2	PGAP	Bakta	Bakta	PGAP	Bakta	Bakta/PGAP/Prokka	PGAP	Bakta	Bakta	Prokka	Prokka	Prokka	Bakta	EggNOG-Mapper	EggNOG-Mapper	EggNOG-Mapper
GCA_000462045.2	PGAP	Bakta	Bakta	PGAP	Bakta	Bakta/PGAP/Prokka	PGAP	Bakta	Bakta	Prokka	Prokka	Prokka	Bakta	EggNOG-Mapper	EggNOG-Mapper	EggNOG-Mapper
GCA_000462065.2	PGAP	Bakta	Bakta	Bakta/PGAP/Prokka	Bakta	Bakta/PGAP/Prokka	PGAP	Bakta	Bakta	Prokka	Prokka	Prokka	Bakta	EggNOG-Mapper	EggNOG-Mapper	EggNOG-Mapper
GCA_000462085.2	PGAP	Bakta	Bakta	PGAP	Bakta	Bakta/PGAP/Prokka	PGAP	Bakta	Bakta	Prokka	Prokka	Prokka	Bakta	EggNOG-Mapper	EggNOG-Mapper	EggNOG-Mapper
GCA_000462105.2	PGAP	Bakta	Bakta	PGAP	Bakta	Bakta/PGAP/Prokka	PGAP	Bakta	Bakta	Prokka	Prokka	Prokka	Bakta	EggNOG-Mapper	EggNOG-Mapper	EggNOG-Mapper
GCA_000462125.2	PGAP	Bakta	Bakta	Bakta/PGAP/Prokka	Bakta	Bakta/PGAP/Prokka	PGAP	Bakta	Bakta	Prokka	Prokka	Prokka	Bakta	EggNOG-Mapper	EggNOG-Mapper	EggNOG-Mapper
GCA_000462145.2	PGAP	Bakta	Bakta	Bakta/PGAP/Prokka	Bakta	Bakta/PGAP/Prokka	PGAP	Bakta	Bakta	Prokka	Prokka	Prokka	Bakta	EggNOG-Mapper	EggNOG-Mapper	EggNOG-Mapper
GCA_000462165.2	PGAP	Bakta	Bakta	Bakta/PGAP/Prokka	Bakta	Bakta/PGAP/Prokka	PGAP	Bakta	Bakta	Prokka	Prokka	Prokka	Bakta	EggNOG-Mapper	EggNOG-Mapper	EggNOG-Mapper
GCA_000462185.2	PGAP	Bakta	Bakta	Bakta/PGAP/Prokka	Bakta	Bakta/PGAP/Prokka	PGAP	Bakta	Bakta	Prokka	Prokka	Prokka	Bakta	EggNOG-Mapper	EggNOG-Mapper	EggNOG-Mapper
GCA_000462225.2	PGAP	Bakta	Bakta	Bakta/PGAP/Prokka	Bakta	Bakta/PGAP/Prokka	PGAP	Bakta	Bakta	Prokka	Prokka	Prokka	Bakta	EggNOG-Mapper	EggNOG-Mapper	EggNOG-Mapper
GCA_000462245.2	PGAP	Bakta	Bakta	Bakta/PGAP/Prokka	Bakta	Bakta/PGAP/Prokka	PGAP	Bakta	Bakta	Prokka	Prokka	Prokka	Bakta	EggNOG-Mapper	EggNOG-Mapper	EggNOG-Mapper
GCA_000462265.2	PGAP	Bakta	Bakta	Bakta/PGAP/Prokka	Bakta	Bakta/PGAP/Prokka	PGAP	Bakta	Bakta	Prokka	Prokka	Prokka	Bakta	EggNOG-Mapper	EggNOG-Mapper	EggNOG-Mapper
GCA_000462285.2	PGAP	Bakta	Bakta	PGAP	Bakta	Bakta/PGAP/Prokka	PGAP	Bakta	Bakta	Prokka	Prokka	Prokka	Bakta	EggNOG-Mapper	EggNOG-Mapper	EggNOG-Mapper
GCA_000462305.2	PGAP	Bakta	Bakta	Bakta/PGAP/Prokka	Bakta	Bakta/PGAP/Prokka	PGAP	Bakta	Bakta	Prokka	Prokka	Prokka	Bakta	EggNOG-Mapper	EggNOG-Mapper	EggNOG-Mapper
GCA_000462325.2	PGAP	Bakta	Bakta	Bakta/PGAP/Prokka	Bakta	Bakta/PGAP/Prokka	PGAP	Bakta	Bakta	Prokka	Prokka	Prokka	Bakta	EggNOG-Mapper	EggNOG-Mapper	EggNOG-Mapper
GCA_000462345.2	PGAP	Bakta	Bakta	Bakta/PGAP/Prokka	Bakta	Bakta/PGAP/Prokka	PGAP	Bakta	Bakta	Prokka	Prokka	Prokka	Bakta	EggNOG-Mapper	EggNOG-Mapper	EggNOG-Mapper
GCA_000462365.2	PGAP	Bakta	Bakta	Bakta/PGAP/Prokka	Bakta	Bakta/PGAP/Prokka	PGAP	Bakta	Bakta	Prokka	Prokka	Prokka	Bakta	EggNOG-Mapper	EggNOG-Mapper	EggNOG-Mapper
GCA_000462385.2	PGAP	Bakta	Bakta	Bakta/PGAP/Prokka	Bakta	Bakta/PGAP/Prokka	PGAP	Bakta	Bakta	Prokka	Prokka	Prokka	Bakta	EggNOG-Mapper	EggNOG-Mapper	EggNOG-Mapper
GCA_000462405.2	PGAP	Bakta	Bakta	PGAP	Bakta	Bakta/PGAP/Prokka	PGAP	Bakta	Bakta	Prokka	Prokka	Prokka	Bakta	EggNOG-Mapper	EggNOG-Mapper	EggNOG-Mapper
GCA_000462425.2	PGAP	Bakta	Bakta	PGAP	Bakta	Bakta/PGAP/Prokka	PGAP	Bakta	Bakta	Prokka	Prokka	Prokka	Bakta	EggNOG-Mapper	EggNOG-Mapper	EggNOG-Mapper
GCA_000462445.2	PGAP	Bakta	Bakta	PGAP	Bakta	Bakta/PGAP/Prokka	PGAP	Bakta	Bakta	Prokka	Prokka	Prokka	Bakta	EggNOG-Mapper	EggNOG-Mapper	EggNOG-Mapper
GCA_000462465.2	PGAP	Bakta	Bakta	PGAP	Bakta	Bakta/PGAP/Prokka	PGAP	Bakta	Bakta	Prokka	Prokka	Prokka	Bakta	EggNOG-Mapper	EggNOG-Mapper	EggNOG-Mapper
GCA_000462485.2	PGAP	Bakta	Bakta	Prokka	Bakta	Bakta/PGAP/Prokka	PGAP	Bakta	Bakta	Prokka	Prokka	Prokka	Bakta	EggNOG-Mapper	EggNOG-Mapper	EggNOG-Mapper
GCA_000462505.2	PGAP	Bakta	Bakta	Bakta/PGAP/Prokka	Bakta	Bakta/PGAP/Prokka	PGAP	Bakta	Bakta	Prokka	Prokka	Prokka	Bakta	EggNOG-Mapper	EggNOG-Mapper	EggNOG-Mapper
GCA_000462525.2	PGAP	Bakta	Bakta	Bakta/PGAP/Prokka	Bakta	Bakta/PGAP/Prokka	PGAP	Bakta	Bakta	Prokka	Prokka	Prokka	Bakta	EggNOG-Mapper	EggNOG-Mapper	EggNOG-Mapper
GCA_000462545.2	PGAP	Bakta	Bakta	PGAP	Bakta	Bakta/PGAP/Prokka	PGAP	Bakta	Bakta	Prokka	Prokka	Prokka	Bakta	EggNOG-Mapper	EggNOG-Mapper	EggNOG-Mapper
GCA_000462565.2	PGAP	Bakta	Bakta	PGAP	Bakta	Bakta/PGAP/Prokka	PGAP	Bakta	Bakta	Prokka	Prokka	Prokka	Bakta	EggNOG-Mapper	EggNOG-Mapper	EggNOG-Mapper
GCA_000462585.2	PGAP	Bakta	Bakta	PGAP	Bakta	Bakta/PGAP/Prokka	PGAP	Bakta	Bakta	Prokka	Prokka	Prokka	Bakta	EggNOG-Mapper	EggNOG-Mapper	EggNOG-Mapper
GCA_000462605.2	PGAP	Bakta	Bakta	Bakta/PGAP/Prokka	Bakta	Bakta/PGAP/Prokka	PGAP	Bakta	Bakta	Prokka	Prokka	Prokka	Bakta	EggNOG-Mapper	EggNOG-Mapper	EggNOG-Mapper
GCA_000462625.2	PGAP	Bakta	Bakta	Bakta/PGAP/Prokka	Bakta	Bakta/PGAP/Prokka	PGAP	Bakta	Bakta	Prokka	Prokka	Prokka	Bakta	EggNOG-Mapper	EggNOG-Mapper	EggNOG-Mapper
GCA_000462645.2	PGAP	Bakta	Bakta	Bakta/PGAP/Prokka	Bakta	Bakta/PGAP/Prokka	PGAP	Bakta	Bakta	Prokka	Prokka	Prokka	Bakta	EggNOG-Mapper	EggNOG-Mapper	EggNOG-Mapper
GCA_000462665.2	PGAP	Bakta	Bakta	PGAP	Bakta	Bakta/PGAP/Prokka	PGAP	Bakta	Bakta	Prokka	Prokka	Prokka	Bakta	EggNOG-Mapper	EggNOG-Mapper	EggNOG-Mapper
GCA_000462685.2	PGAP	Bakta	Bakta	PGAP	Bakta	Bakta/PGAP/Prokka	PGAP	Bakta	Bakta	Prokka	Prokka	Prokka	Bakta	EggNOG-Mapper	EggNOG-Mapper	EggNOG-Mapper
GCA_000462705.2	PGAP	Bakta	Bakta	Bakta/PGAP/Prokka	Bakta	Bakta/PGAP/Prokka	PGAP	Bakta	Bakta	Prokka	Prokka	Prokka	Bakta	EggNOG-Mapper	EggNOG-Mapper	EggNOG-Mapper
GCA_000462725.2	PGAP	Bakta	Bakta	Bakta/PGAP/Prokka	Bakta	Bakta/PGAP/Prokka	PGAP	Bakta	Bakta	Prokka	Prokka	Prokka	Bakta	EggNOG-Mapper	EggNOG-Mapper	EggNOG-Mapper
GCA_000462745.2	PGAP	Bakta	Bakta	PGAP	Bakta	Bakta/PGAP/Prokka	PGAP	Bakta	Bakta	Prokka	Prokka	Prokka	Bakta	EggNOG-Mapper	EggNOG-Mapper	EggNOG-Mapper
GCA_000462765.2	PGAP	Bakta	Bakta	PGAP	Bakta	Bakta/PGAP/Prokka	PGAP	Bakta	Bakta	Prokka	Prokka	Prokka	Bakta	EggNOG-Mapper	EggNOG-Mapper	EggNOG-Mapper
GCA_000462785.2	PGAP	Bakta	Bakta	Bakta/PGAP/Prokka	Bakta	Bakta/PGAP/Prokka	PGAP	Bakta	Bakta	Prokka	Prokka	Prokka	Bakta	EggNOG-Mapper	EggNOG-Mapper	EggNOG-Mapper
GCA_000462805.2	PGAP	Bakta	Bakta	Bakta/PGAP/Prokka	Bakta	Bakta/PGAP/Prokka	PGAP	Bakta	Bakta	Prokka	Prokka	Prokka	Bakta	EggNOG-Mapper	EggNOG-Mapper	EggNOG-Mapper
GCA_000462825.2	PGAP	Bakta	Bakta	PGAP	Bakta	Bakta/PGAP/Prokka	PGAP	Bakta	Bakta	Prokka	Prokka	Prokka	Bakta	EggNOG-Mapper	EggNOG-Mapper	EggNOG-Mapper
GCA_000462845.2	PGAP	Bakta	Bakta	PGAP	Bakta	Bakta/PGAP/Prokka	PGAP	Bakta	Bakta	Prokka	Prokka	Prokka	Bakta	EggNOG-Mapper	EggNOG-Mapper	EggNOG-Mapper
GCA_000462865.2	PGAP	Bakta	Bakta	Bakta/PGAP/Prokka	Bakta	Bakta/PGAP/Prokka	PGAP	Bakta	Bakta	Prokka	Prokka	Prokka	Bakta	EggNOG-Mapper	EggNOG-Mapper	EggNOG-Mapper
GCA_000462885.2	PGAP	Bakta	Bakta	Bakta/PGAP/Prokka	Bakta	Bakta/PGAP/Prokka	PGAP	Bakta	Bakta	Prokka	Prokka	Prokka	Bakta	EggNOG-Mapper	EggNOG-Mapper	EggNOG-Mapper
GCA_000462905.2	PGAP	Bakta	Bakta	Bakta/PGAP/Prokka	Bakta	Bakta/PGAP/Prokka	PGAP	Bakta	Bakta	Prokka	Prokka	Prokka	Bakta	EggNOG-Mapper	EggNOG-Mapper	EggNOG-Mapper
GCA_000463605.1	PGAP	Bakta	Bakta	Bakta/PGAP/Prokka	Bakta/PGAP/Prokka	Bakta/PGAP/Prokka	PGAP	Bakta	Bakta	PGAP	Prokka	Prokka	Bakta	EggNOG-Mapper	EggNOG-Mapper	EggNOG-Mapper
GCA_000464915.1	PGAP	Bakta	Bakta	Bakta/PGAP/Prokka	Bakta	Bakta/PGAP/Prokka	PGAP	PGAP	Bakta	PGAP	Prokka	Prokka	EggNOG-Mapper	EggNOG-Mapper	EggNOG-Mapper	EggNOG-Mapper
GCA_000464955.2	PGAP	Bakta	Bakta	Bakta/PGAP/Prokka	Bakta	Bakta/PGAP/Prokka	PGAP	Bakta	Bakta	Prokka	Prokka	Prokka	Bakta	EggNOG-Mapper	EggNOG-Mapper	EggNOG-Mapper
GCA_000465135.1	PGAP	Bakta	Bakta	Bakta/PGAP/Prokka	Bakta/PGAP/Prokka	Bakta/PGAP/Prokka	PGAP	Bakta	Bakta	EggNOG-Mapper	Prokka	Prokka	Bakta	EggNOG-Mapper	EggNOG-Mapper	EggNOG-Mapper
GCA_000465155.1	PGAP	Bakta	Bakta	Prokka	Bakta/PGAP/Prokka	Bakta/PGAP/Prokka	PGAP	Bakta	Bakta	PGAP	Prokka	Prokka	Bakta	EggNOG-Mapper	EggNOG-Mapper	EggNOG-Mapper
GCA_000466625.1	PGAP	Bakta	Bakta	PGAP	Bakta	Bakta/PGAP/Prokka	PGAP	PGAP	Bakta	Prokka	Prokka	EggNOG-Mapper	Bakta	EggNOG-Mapper	EggNOG-Mapper	EggNOG-Mapper
GCA_000467695.1	PGAP	Bakta	Bakta	PGAP	Bakta	Bakta/PGAP/Prokka	PGAP	Bakta	Bakta	Prokka	Prokka	Prokka	Bakta	EggNOG-Mapper	EggNOG-Mapper	EggNOG-Mapper
GCA_000468515.1	PGAP	Bakta	Bakta	Prokka	Bakta/PGAP/Prokka	Bakta/PGAP/Prokka	PGAP	Bakta	Bakta	Prokka	Prokka	Prokka	Bakta	EggNOG-Mapper	EggNOG-Mapper	EggNOG-Mapper
GCA_000471065.1	PGAP	Bakta	Bakta	PGAP	Bakta	Bakta/PGAP/Prokka	PGAP	PGAP	Bakta	Prokka	Prokka	EggNOG-Mapper	Bakta	EggNOG-Mapper	EggNOG-Mapper	EggNOG-Mapper
GCA_000471085.2	PGAP	Bakta	Bakta	PGAP	Bakta	Bakta/PGAP/Prokka	PGAP	PGAP	Bakta	Prokka	Prokka	EggNOG-Mapper	Bakta	EggNOG-Mapper	EggNOG-Mapper	EggNOG-Mapper
GCA_000471105.1	PGAP	Bakta	Bakta	PGAP	Bakta	Bakta/PGAP/Prokka	PGAP	PGAP	Bakta	Prokka	Prokka	EggNOG-Mapper	Bakta	EggNOG-Mapper	EggNOG-Mapper	EggNOG-Mapper
GCA_000471125.1	PGAP	Bakta	Bakta	PGAP	Bakta	Bakta/PGAP/Prokka	PGAP	PGAP	Bakta	Prokka	Prokka	EggNOG-Mapper	Bakta	EggNOG-Mapper	EggNOG-Mapper	EggNOG-Mapper
GCA_000471145.1	PGAP	Bakta	Bakta	PGAP	Bakta	Bakta/PGAP/Prokka	PGAP	PGAP	Bakta	Prokka	Prokka	EggNOG-Mapper	Bakta	EggNOG-Mapper	EggNOG-Mapper	EggNOG-Mapper
GCA_000471165.1	PGAP	Bakta	Bakta	PGAP	Bakta	Bakta/PGAP/Prokka	PGAP	PGAP	Bakta	Prokka	Prokka	EggNOG-Mapper	Bakta	EggNOG-Mapper	EggNOG-Mapper	EggNOG-Mapper
GCA_000471185.1	PGAP	Bakta	Bakta	PGAP	Bakta/PGAP/Prokka	Bakta/PGAP/Prokka	PGAP	PGAP	Bakta	Prokka	Prokka	EggNOG-Mapper	EggNOG-Mapper	EggNOG-Mapper	EggNOG-Mapper	EggNOG-Mapper
GCA_000471205.1	PGAP	Bakta	Bakta	PGAP	Bakta	Bakta/PGAP/Prokka	PGAP	PGAP	Bakta	Prokka	Prokka	EggNOG-Mapper	Bakta	Bakta	EggNOG-Mapper	EggNOG-Mapper
GCA_000471225.1	PGAP	Bakta	Bakta	PGAP	Bakta	Bakta/PGAP/Prokka	PGAP	PGAP	Bakta	Prokka	Prokka	EggNOG-Mapper	Bakta	Bakta	EggNOG-Mapper	EggNOG-Mapper
GCA_000471245.1	PGAP	Bakta	Bakta	PGAP	Bakta	Bakta/PGAP/Prokka	PGAP	PGAP	Bakta	Prokka	Prokka	EggNOG-Mapper	Bakta	EggNOG-Mapper	EggNOG-Mapper	EggNOG-Mapper
GCA_000471265.1	PGAP	Bakta	Bakta	PGAP	Bakta	Bakta/PGAP/Prokka	PGAP	PGAP	Bakta	Prokka	Prokka	EggNOG-Mapper	Bakta	EggNOG-Mapper	EggNOG-Mapper	EggNOG-Mapper
GCA_000471285.1	PGAP	Bakta	Bakta	PGAP	Bakta	Bakta/PGAP/Prokka	PGAP	PGAP	Bakta	Prokka	Prokka	EggNOG-Mapper	Bakta	EggNOG-Mapper	EggNOG-Mapper	EggNOG-Mapper
GCA_000471305.1	PGAP	Bakta	Bakta	PGAP	Bakta	Bakta/PGAP/Prokka	PGAP	PGAP	Bakta	Prokka	Prokka	EggNOG-Mapper	Bakta	Bakta	EggNOG-Mapper	EggNOG-Mapper
GCA_000471325.1	PGAP	Bakta	Bakta	PGAP	Bakta	Bakta/PGAP/Prokka	PGAP	PGAP	Bakta	Prokka	Prokka	EggNOG-Mapper	Bakta	EggNOG-Mapper	EggNOG-Mapper	EggNOG-Mapper
GCA_000471345.1	PGAP	Bakta	Bakta	PGAP	Bakta	Bakta/PGAP/Prokka	PGAP	PGAP	Bakta	Prokka	Prokka	EggNOG-Mapper	Bakta	EggNOG-Mapper	EggNOG-Mapper	EggNOG-Mapper
GCA_000471365.1	PGAP	Bakta	Bakta	PGAP	Bakta	Bakta/PGAP/Prokka	PGAP	PGAP	Bakta	Prokka	Prokka	EggNOG-Mapper	Bakta	EggNOG-Mapper	EggNOG-Mapper	EggNOG-Mapper
GCA_000471385.1	PGAP	Bakta	Bakta	PGAP	Bakta	Bakta/PGAP/Prokka	PGAP	PGAP	Bakta	Prokka	Prokka	EggNOG-Mapper	Bakta	EggNOG-Mapper	EggNOG-Mapper	EggNOG-Mapper
GCA_000471405.1	PGAP	Bakta	Bakta	PGAP	Bakta	Bakta/PGAP/Prokka	PGAP	PGAP	Bakta	Prokka	Prokka	EggNOG-Mapper	Bakta	EggNOG-Mapper	EggNOG-Mapper	EggNOG-Mapper
GCA_000471425.1	PGAP	Bakta	Bakta	PGAP	Bakta	Bakta/PGAP/Prokka	PGAP	PGAP	Bakta	Prokka	Prokka	EggNOG-Mapper	Bakta	EggNOG-Mapper	EggNOG-Mapper	EggNOG-Mapper
GCA_000471465.1	PGAP	Bakta	Bakta	PGAP	Bakta	Bakta/PGAP/Prokka	PGAP	PGAP	Bakta	Prokka	Prokka	EggNOG-Mapper	EggNOG-Mapper	EggNOG-Mapper	EggNOG-Mapper	EggNOG-Mapper
GCA_000471485.1	PGAP	Bakta	Bakta	PGAP	Bakta	Bakta/PGAP/Prokka	PGAP	PGAP	Bakta	Prokka	Prokka	EggNOG-Mapper	Bakta	EggNOG-Mapper	EggNOG-Mapper	EggNOG-Mapper
GCA_000471505.1	PGAP	Bakta	Bakta	PGAP	Bakta	Bakta/PGAP/Prokka	PGAP	PGAP	Bakta	Prokka	Prokka	EggNOG-Mapper	Bakta	EggNOG-Mapper	EggNOG-Mapper	EggNOG-Mapper
GCA_000471525.1	PGAP	Bakta	Bakta	PGAP	Bakta	Bakta/PGAP/Prokka	PGAP	PGAP	Bakta	Prokka	Prokka	EggNOG-Mapper	Bakta	EggNOG-Mapper	EggNOG-Mapper	EggNOG-Mapper
GCA_000471545.1	PGAP	Bakta	Bakta	PGAP	Bakta	Bakta/PGAP/Prokka	PGAP	PGAP	Bakta	Prokka	Prokka	EggNOG-Mapper	Bakta	Bakta	EggNOG-Mapper	EggNOG-Mapper
GCA_000471565.1	PGAP	Bakta	Bakta	PGAP	Bakta	Bakta/PGAP/Prokka	PGAP	PGAP	Bakta	Prokka	Prokka	EggNOG-Mapper	Bakta	EggNOG-Mapper	EggNOG-Mapper	EggNOG-Mapper
GCA_000471585.1	PGAP	Bakta	Bakta	PGAP	Bakta	Bakta/PGAP/Prokka	PGAP	PGAP	Bakta	Prokka	Prokka	EggNOG-Mapper	Bakta	Bakta	EggNOG-Mapper	EggNOG-Mapper
GCA_000471605.1	PGAP	Bakta	Bakta	PGAP	Bakta	Bakta/PGAP/Prokka	PGAP	PGAP	Bakta	Prokka	Prokka	EggNOG-Mapper	Bakta	Bakta	EggNOG-Mapper	EggNOG-Mapper
GCA_000473725.2	PGAP	Bakta	Bakta	Bakta/PGAP/Prokka	Bakta	Bakta/PGAP/Prokka	PGAP	PGAP	Bakta	Prokka	Prokka	EggNOG-Mapper	Bakta	EggNOG-Mapper	EggNOG-Mapper	EggNOG-Mapper
GCA_000474035.1	PGAP	Bakta	Bakta	Bakta/PGAP/Prokka	Bakta	Bakta/PGAP/Prokka	PGAP	Bakta	Bakta	Prokka	Prokka	Prokka	Bakta	EggNOG-Mapper	EggNOG-Mapper	EggNOG-Mapper
GCA_000474825.1	PGAP	Bakta	Bakta	Bakta/PGAP/Prokka	Bakta	Bakta/PGAP/Prokka	PGAP	Bakta	Bakta	PGAP	Prokka	Prokka	Bakta	EggNOG-Mapper	EggNOG-Mapper	EggNOG-Mapper
GCA_000474845.1	PGAP	Bakta	Bakta	Bakta/PGAP/Prokka	Bakta	Bakta/PGAP/Prokka	PGAP	Bakta	Bakta	PGAP	Prokka	Prokka	Bakta	EggNOG-Mapper	EggNOG-Mapper	EggNOG-Mapper
GCA_000477495.2	PGAP	Bakta	Bakta	PGAP	Bakta	Bakta/PGAP/Prokka	PGAP	Bakta	Bakta	Prokka	Prokka	Prokka	Bakta	EggNOG-Mapper	EggNOG-Mapper	EggNOG-Mapper
GCA_000478215.1	PGAP	Bakta	Bakta	PGAP	Bakta	Bakta/PGAP/Prokka	PGAP	Bakta	Bakta	PGAP	Prokka	Prokka	Bakta	EggNOG-Mapper	EggNOG-Mapper	EggNOG-Mapper
GCA_000478705.1	PGAP	Bakta	Bakta	PGAP	Bakta	Bakta/PGAP/Prokka	PGAP	Bakta	Bakta	Prokka	Prokka	EggNOG-Mapper	Bakta	EggNOG-Mapper	EggNOG-Mapper	EggNOG-Mapper
GCA_000482045.1	PGAP	Bakta	Bakta	Bakta/PGAP/Prokka	Bakta	Bakta/PGAP/Prokka	PGAP	Bakta	Bakta	Prokka	Prokka	Prokka	Bakta	EggNOG-Mapper	EggNOG-Mapper	EggNOG-Mapper
GCA_000482065.1	PGAP	Bakta	Bakta	Prokka	Bakta	Bakta/PGAP/Prokka	PGAP	Bakta	Bakta	Prokka	Prokka	Prokka	Bakta	EggNOG-Mapper	EggNOG-Mapper	EggNOG-Mapper
GCA_000482265.1	PGAP	Bakta	Bakta	Bakta/PGAP/Prokka	Bakta	Bakta/PGAP/Prokka	PGAP	Bakta	Bakta	Prokka	Prokka	Prokka	Bakta	Bakta	EggNOG-Mapper	EggNOG-Mapper
GCA_000485615.1	PGAP	Bakta	Bakta	PGAP	Bakta	Bakta/PGAP/Prokka	PGAP	Bakta	Bakta	Prokka	Prokka	Prokka	Bakta	EggNOG-Mapper	EggNOG-Mapper	EggNOG-Mapper
GCA_000485635.1	PGAP	Bakta	Bakta	Bakta/PGAP/Prokka	Bakta	Bakta/PGAP/Prokka	PGAP	Bakta	Bakta	Prokka	Prokka	Prokka	Bakta	EggNOG-Mapper	EggNOG-Mapper	EggNOG-Mapper
GCA_000485655.1	Bakta	Bakta	Bakta	PGAP	Bakta	Bakta/PGAP/Prokka	PGAP	Bakta	Bakta	EggNOG-Mapper	Prokka	Prokka	Bakta	EggNOG-Mapper	EggNOG-Mapper	EggNOG-Mapper
GCA_000485675.1	PGAP	Bakta	Bakta	Bakta/PGAP/Prokka	Bakta	Bakta/PGAP/Prokka	PGAP	Bakta	Bakta	Prokka	Prokka	Prokka	Bakta	EggNOG-Mapper	EggNOG-Mapper	EggNOG-Mapper
GCA_000485695.1	PGAP	Bakta	Bakta	Bakta/PGAP/Prokka	Bakta	Bakta/PGAP/Prokka	PGAP	Bakta	Bakta	Prokka	Prokka	Prokka	Bakta	EggNOG-Mapper	EggNOG-Mapper	EggNOG-Mapper
GCA_000485715.1	PGAP	Bakta	Bakta	PGAP	Bakta	Bakta/PGAP/Prokka	PGAP	Bakta	Bakta	Prokka	Prokka	Prokka	Bakta	EggNOG-Mapper	EggNOG-Mapper	EggNOG-Mapper
GCA_000485735.1	PGAP	Bakta	Bakta	Bakta/PGAP/Prokka	Bakta	Bakta/PGAP/Prokka	PGAP	Bakta	Bakta	Prokka	Prokka	Prokka	Bakta	EggNOG-Mapper	EggNOG-Mapper	EggNOG-Mapper
GCA_000488015.1	PGAP	Bakta	Bakta	Bakta/Prokka	Bakta	Bakta/PGAP/Prokka	Bakta	Bakta	Bakta	EggNOG-Mapper	Prokka	EggNOG-Mapper	Bakta	EggNOG-Mapper	EggNOG-Mapper	EggNOG-Mapper
GCA_000488035.1	PGAP	Bakta	Bakta	PGAP	Bakta	Bakta/PGAP/Prokka	PGAP	Bakta	Bakta	EggNOG-Mapper	Prokka	Prokka	Bakta	EggNOG-Mapper	EggNOG-Mapper	EggNOG-Mapper
GCA_000488055.1	PGAP	Bakta	Bakta	Prokka	Bakta	Bakta/PGAP/Prokka	PGAP	Bakta	Bakta	EggNOG-Mapper	Prokka	Prokka	Bakta	EggNOG-Mapper	EggNOG-Mapper	EggNOG-Mapper
GCA_000488075.1	PGAP	Bakta	Bakta	Prokka	Bakta	Bakta/PGAP/Prokka	PGAP	Bakta	Bakta	EggNOG-Mapper	Prokka	Prokka	Bakta	EggNOG-Mapper	EggNOG-Mapper	EggNOG-Mapper
GCA_000488095.1	PGAP	Bakta	Bakta	Bakta/Prokka	Bakta/PGAP/Prokka	Bakta/PGAP/Prokka	PGAP	Bakta	Bakta	EggNOG-Mapper	Prokka	Prokka	Bakta	EggNOG-Mapper	EggNOG-Mapper	EggNOG-Mapper
GCA_000488115.1	PGAP	Bakta	Bakta	Prokka	Bakta	Bakta/PGAP/Prokka	PGAP	Bakta	Bakta	EggNOG-Mapper	Prokka	Prokka	Bakta	EggNOG-Mapper	EggNOG-Mapper	EggNOG-Mapper
GCA_000488135.1	PGAP	Bakta	Bakta	PGAP	Bakta	Bakta/PGAP/Prokka	PGAP	Bakta	Bakta	EggNOG-Mapper	Prokka	Prokka	Bakta	EggNOG-Mapper	EggNOG-Mapper	EggNOG-Mapper
GCA_000488155.1	PGAP	Bakta	Bakta	Bakta/PGAP/Prokka	Bakta	Bakta/PGAP/Prokka	PGAP	Bakta	Bakta	EggNOG-Mapper	Prokka	Prokka	Bakta	EggNOG-Mapper	EggNOG-Mapper	EggNOG-Mapper
GCA_000488295.1	PGAP	Bakta	Bakta	PGAP	Bakta	Bakta/PGAP/Prokka	PGAP	PGAP	Bakta	Prokka	Prokka	Prokka	Bakta	EggNOG-Mapper	EggNOG-Mapper	EggNOG-Mapper
GCA_000488315.1	PGAP	Bakta	Bakta	Bakta/PGAP/Prokka	Bakta	Bakta/PGAP/Prokka	PGAP	Bakta	Bakta	Prokka	Prokka	Prokka	Bakta	EggNOG-Mapper	EggNOG-Mapper	EggNOG-Mapper
GCA_000488335.1	PGAP	Bakta	Bakta	Bakta/PGAP/Prokka	Bakta	Bakta/PGAP/Prokka	PGAP	Bakta	Bakta	Prokka	Prokka	Prokka	Bakta	EggNOG-Mapper	EggNOG-Mapper	EggNOG-Mapper
GCA_000488355.1	PGAP	Bakta	Bakta	PGAP	Bakta	Bakta/PGAP/Prokka	PGAP	Bakta	Bakta	Prokka	Prokka	Prokka	Bakta	EggNOG-Mapper	EggNOG-Mapper	EggNOG-Mapper
GCA_000488375.1	PGAP	Bakta	Bakta	Bakta/PGAP/Prokka	Bakta	Bakta/PGAP/Prokka	PGAP	Bakta	Bakta	Prokka	Prokka	Prokka	EggNOG-Mapper	EggNOG-Mapper	EggNOG-Mapper	EggNOG-Mapper
GCA_000488395.1	PGAP	Bakta	Bakta	Bakta/PGAP/Prokka	Bakta	Bakta/PGAP/Prokka	PGAP	Bakta	Bakta	Prokka	Prokka	Prokka	EggNOG-Mapper	EggNOG-Mapper	EggNOG-Mapper	EggNOG-Mapper
GCA_000488415.1	Bakta	Bakta	Bakta	PGAP	Bakta	Bakta/PGAP/Prokka	PGAP	Bakta	Bakta	EggNOG-Mapper	Prokka	Prokka	Bakta	EggNOG-Mapper	EggNOG-Mapper	EggNOG-Mapper
GCA_000488435.1	PGAP	Bakta	Bakta	Bakta/PGAP/Prokka	Bakta	Bakta/PGAP/Prokka	PGAP	Bakta	Bakta	Prokka	Prokka	Prokka	Bakta	EggNOG-Mapper	EggNOG-Mapper	EggNOG-Mapper
GCA_000488455.1	PGAP	Bakta	Bakta	Bakta/PGAP/Prokka	Bakta	Bakta/PGAP/Prokka	PGAP	PGAP	Bakta	Prokka	Prokka	Prokka	Bakta	EggNOG-Mapper	EggNOG-Mapper	EggNOG-Mapper
GCA_000488475.1	PGAP	Bakta	Bakta	Bakta/PGAP/Prokka	Bakta	Bakta/PGAP/Prokka	PGAP	Bakta	Bakta	Prokka	Prokka	Prokka	Bakta	EggNOG-Mapper	EggNOG-Mapper	EggNOG-Mapper
GCA_000488495.1	PGAP	Bakta	Bakta	Bakta/PGAP/Prokka	Bakta	Bakta/PGAP/Prokka	PGAP	Bakta	Bakta	Prokka	Prokka	Prokka	EggNOG-Mapper	EggNOG-Mapper	EggNOG-Mapper	EggNOG-Mapper
GCA_000488515.1	PGAP	Bakta	Bakta	Bakta/PGAP/Prokka	Bakta	Bakta/PGAP/Prokka	PGAP	Bakta	Bakta	Prokka	Prokka	Prokka	Bakta	EggNOG-Mapper	EggNOG-Mapper	EggNOG-Mapper
GCA_000488535.1	PGAP	Bakta	Bakta	Bakta/PGAP/Prokka	Bakta	Bakta/PGAP/Prokka	PGAP	Bakta	Bakta	Prokka	Prokka	Prokka	Bakta	EggNOG-Mapper	EggNOG-Mapper	EggNOG-Mapper
GCA_000488555.1	PGAP	Bakta	Bakta	Bakta/PGAP/Prokka	Bakta	Bakta/PGAP/Prokka	PGAP	Bakta	Bakta	Prokka	Prokka	Prokka	EggNOG-Mapper	EggNOG-Mapper	EggNOG-Mapper	EggNOG-Mapper
GCA_000488575.1	PGAP	Bakta	Bakta	PGAP	Bakta	Bakta/PGAP/Prokka	PGAP	Bakta	Bakta	Prokka	Prokka	Prokka	EggNOG-Mapper	EggNOG-Mapper	EggNOG-Mapper	EggNOG-Mapper
GCA_000488595.1	PGAP	Bakta	Bakta	PGAP	Bakta	Bakta/PGAP/Prokka	PGAP	Bakta	Bakta	Prokka	Prokka	Prokka	Bakta	EggNOG-Mapper	EggNOG-Mapper	EggNOG-Mapper
GCA_000488615.1	PGAP	Bakta	Bakta	PGAP	Bakta	Bakta/PGAP/Prokka	PGAP	Bakta	Bakta	Prokka	Prokka	Prokka	Bakta	EggNOG-Mapper	EggNOG-Mapper	EggNOG-Mapper
GCA_000488635.1	PGAP	Bakta	Bakta	PGAP	Bakta	Bakta/PGAP/Prokka	PGAP	Bakta	Bakta	Prokka	Prokka	Prokka	Bakta	EggNOG-Mapper	EggNOG-Mapper	EggNOG-Mapper
GCA_000488655.1	PGAP	Bakta	Bakta	PGAP	Bakta	Bakta/PGAP/Prokka	PGAP	Bakta	Bakta	Prokka	Prokka	Prokka	Bakta	EggNOG-Mapper	EggNOG-Mapper	EggNOG-Mapper
GCA_000488675.1	PGAP	Bakta	Bakta	PGAP	Bakta	Bakta/PGAP/Prokka	PGAP	Bakta	Bakta	Prokka	Prokka	Prokka	Bakta	EggNOG-Mapper	EggNOG-Mapper	EggNOG-Mapper
GCA_000488695.1	PGAP	Bakta	Bakta	PGAP/Prokka	Bakta	Bakta/PGAP/Prokka	PGAP	Bakta	Bakta	Prokka	Prokka	Prokka	EggNOG-Mapper	EggNOG-Mapper	EggNOG-Mapper	EggNOG-Mapper
GCA_000488715.1	PGAP	Bakta	Bakta	Bakta/PGAP/Prokka	Bakta	Bakta/PGAP/Prokka	PGAP	Bakta	Bakta	Prokka	Prokka	Prokka	EggNOG-Mapper	EggNOG-Mapper	EggNOG-Mapper	EggNOG-Mapper
GCA_000488735.1	PGAP	Bakta	Bakta	Bakta/PGAP/Prokka	Bakta/PGAP/Prokka	Bakta/PGAP/Prokka	PGAP	Bakta	Bakta	Prokka	Prokka	Prokka	Bakta	EggNOG-Mapper	EggNOG-Mapper	EggNOG-Mapper
GCA_000488755.1	PGAP	Bakta	Bakta	PGAP	Bakta	Bakta/PGAP/Prokka	PGAP	Bakta	Bakta	Prokka	Prokka	Prokka	Bakta	EggNOG-Mapper	EggNOG-Mapper	EggNOG-Mapper
GCA_000488775.1	PGAP	Bakta	Bakta	Bakta/PGAP/Prokka	Bakta	Bakta/PGAP/Prokka	PGAP	Bakta	Bakta	Prokka	Prokka	Prokka	Bakta	EggNOG-Mapper	EggNOG-Mapper	EggNOG-Mapper
GCA_000488795.1	PGAP	Bakta	Bakta	Bakta/PGAP/Prokka	Bakta	Bakta/PGAP/Prokka	PGAP	Bakta	Bakta	Prokka	Prokka	Prokka	EggNOG-Mapper	EggNOG-Mapper	EggNOG-Mapper	EggNOG-Mapper
GCA_000488815.1	PGAP	Bakta	Bakta	Bakta/PGAP/Prokka	Bakta	Bakta/PGAP/Prokka	PGAP	Bakta	Bakta	Prokka	Prokka	Prokka	Bakta/EggNOG-Mapper	EggNOG-Mapper	EggNOG-Mapper	EggNOG-Mapper
GCA_000488835.1	PGAP	Bakta	Bakta	Bakta/PGAP/Prokka	Bakta	Bakta/PGAP/Prokka	PGAP	Bakta	Bakta	Prokka	Prokka	Prokka	Bakta	EggNOG-Mapper	EggNOG-Mapper	EggNOG-Mapper
GCA_000492235.1	PGAP	Bakta	Bakta	Bakta/PGAP/Prokka	Bakta	Bakta/PGAP/Prokka	PGAP	Bakta	Bakta	PGAP	Prokka	Prokka	Bakta	EggNOG-Mapper	EggNOG-Mapper	EggNOG-Mapper
GCA_000492255.1	PGAP	Bakta	Bakta	Bakta/PGAP/Prokka	Bakta	Bakta/PGAP/Prokka	PGAP	Bakta	Bakta	EggNOG-Mapper	Prokka	Prokka	Bakta	EggNOG-Mapper	EggNOG-Mapper	EggNOG-Mapper
GCA_000492275.1	PGAP	Bakta	Bakta	Prokka	Bakta	Bakta/PGAP/Prokka	PGAP	Bakta	Bakta	PGAP	Prokka	Prokka	Bakta	EggNOG-Mapper	EggNOG-Mapper	EggNOG-Mapper
GCA_000492655.1	PGAP	Bakta	Bakta	Prokka	Bakta	Bakta/PGAP/Prokka	PGAP	Bakta	Bakta	EggNOG-Mapper	Prokka	Prokka	Bakta	EggNOG-Mapper	EggNOG-Mapper	EggNOG-Mapper
GCA_000493595.1	PGAP	Bakta	Bakta	Bakta/PGAP/Prokka	Bakta	Bakta/PGAP/Prokka	PGAP	Bakta	Bakta	PGAP	Prokka	EggNOG-Mapper	Bakta	EggNOG-Mapper	EggNOG-Mapper	EggNOG-Mapper
GCA_000493755.1	PGAP	Bakta	Bakta	Bakta/PGAP/Prokka	Bakta	Bakta/PGAP/Prokka	PGAP	Bakta	Bakta	PGAP	Prokka	Prokka	Bakta	EggNOG-Mapper	EggNOG-Mapper	EggNOG-Mapper
GCA_000494935.1	PGAP	Bakta	Bakta	PGAP	Bakta	Bakta/PGAP/Prokka	PGAP	Bakta	Bakta	EggNOG-Mapper	Prokka	Prokka	Bakta	EggNOG-Mapper	EggNOG-Mapper	EggNOG-Mapper
GCA_000494955.1	PGAP	Bakta	Bakta	Prokka	Bakta	Bakta/PGAP/Prokka	PGAP	Bakta	Bakta	EggNOG-Mapper	Prokka	Prokka	Bakta	EggNOG-Mapper	EggNOG-Mapper	EggNOG-Mapper
GCA_000494975.1	PGAP	Bakta	Bakta	Prokka	Bakta/PGAP/Prokka	Bakta/PGAP/Prokka	PGAP	Bakta	Bakta	EggNOG-Mapper	Prokka	Prokka	Bakta	EggNOG-Mapper	EggNOG-Mapper	EggNOG-Mapper
GCA_000494995.1	PGAP	Bakta	Bakta	PGAP	Bakta	Bakta/PGAP/Prokka	PGAP	Bakta	Bakta	EggNOG-Mapper	Prokka	Prokka	Bakta	EggNOG-Mapper	EggNOG-Mapper	EggNOG-Mapper
GCA_000495015.1	PGAP	Bakta	Bakta	Prokka	Bakta/PGAP/Prokka	Bakta/PGAP/Prokka	PGAP	Bakta	Bakta	EggNOG-Mapper	Prokka	Prokka	Bakta	EggNOG-Mapper	EggNOG-Mapper	EggNOG-Mapper
GCA_000495035.1	PGAP	Bakta	Bakta	Prokka	Bakta	Bakta/PGAP/Prokka	Bakta	Bakta	Bakta	EggNOG-Mapper	Prokka	EggNOG-Mapper	Bakta	EggNOG-Mapper	EggNOG-Mapper	EggNOG-Mapper
GCA_000495055.1	PGAP	Bakta	Bakta	Prokka	Bakta	Bakta/PGAP/Prokka	PGAP	Bakta	Bakta	EggNOG-Mapper	Prokka	Prokka	Bakta	EggNOG-Mapper	EggNOG-Mapper	EggNOG-Mapper
GCA_000495075.1	PGAP	Bakta	Bakta	Bakta/Prokka	Bakta/PGAP/Prokka	Bakta/PGAP/Prokka	PGAP	Bakta	Bakta	EggNOG-Mapper	Prokka	Prokka	Bakta	EggNOG-Mapper	EggNOG-Mapper	EggNOG-Mapper
GCA_000495095.1	PGAP	Bakta	Bakta	Prokka	Bakta/PGAP/Prokka	Bakta/PGAP/Prokka	PGAP	Bakta	Bakta	EggNOG-Mapper	Prokka	Prokka	Bakta	EggNOG-Mapper	EggNOG-Mapper	EggNOG-Mapper
GCA_000496345.2	PGAP	Bakta	Bakta	PGAP	Bakta	Bakta/PGAP/Prokka	PGAP	Bakta	Bakta	Prokka	Prokka	EggNOG-Mapper	Bakta	EggNOG-Mapper	EggNOG-Mapper	EggNOG-Mapper
GCA_000496365.2	PGAP	Bakta	Bakta	PGAP	Bakta	Bakta/PGAP/Prokka	PGAP	Bakta	Bakta	Prokka	Prokka	EggNOG-Mapper	Bakta	Bakta	EggNOG-Mapper	EggNOG-Mapper
GCA_000496975.1	PGAP	Bakta	Bakta	PGAP	Bakta	Bakta/PGAP/Prokka	PGAP	PGAP	Bakta	Prokka	Prokka	Prokka	EggNOG-Mapper	EggNOG-Mapper	EggNOG-Mapper	EggNOG-Mapper
GCA_000496995.1	PGAP	Bakta	Bakta	PGAP	Bakta	Bakta/PGAP/Prokka	PGAP	Bakta	Bakta	Prokka	Prokka	Prokka	Bakta	EggNOG-Mapper	EggNOG-Mapper	EggNOG-Mapper
GCA_000497015.1	PGAP	Bakta	Bakta	PGAP	Bakta	Bakta/PGAP/Prokka	PGAP	Bakta	Bakta	Prokka	Prokka	Prokka	Bakta	EggNOG-Mapper	EggNOG-Mapper	EggNOG-Mapper
GCA_000498195.1	PGAP	Bakta	Bakta	Bakta/PGAP/Prokka	Bakta/PGAP/Prokka	Bakta/PGAP/Prokka	PGAP	PGAP	Bakta	PGAP	Prokka	Prokka	EggNOG-Mapper	EggNOG-Mapper	EggNOG-Mapper	EggNOG-Mapper
GCA_000498215.1	PGAP	Bakta	Bakta	Bakta/PGAP/Prokka	Bakta	Bakta/PGAP/Prokka	PGAP	PGAP	Bakta	Prokka	Prokka	Prokka	EggNOG-Mapper	EggNOG-Mapper	EggNOG-Mapper	EggNOG-Mapper
GCA_000498235.1	PGAP	Bakta	Bakta	Bakta/PGAP/Prokka	Bakta	Bakta/PGAP/Prokka	PGAP	Bakta	Bakta	Prokka	Prokka	Prokka	Bakta	Bakta	EggNOG-Mapper	EggNOG-Mapper
GCA_000498255.1	PGAP	Bakta	Bakta	Bakta/PGAP/Prokka	Bakta/PGAP/Prokka	Bakta/PGAP/Prokka	PGAP	Bakta	Bakta	Prokka	Prokka	Prokka	Bakta	EggNOG-Mapper	EggNOG-Mapper	EggNOG-Mapper
GCA_000498275.1	PGAP	Bakta	Bakta	Bakta/PGAP/Prokka	Bakta/PGAP/Prokka	Bakta/PGAP/Prokka	PGAP	Bakta	Bakta	Prokka	Prokka	Prokka	Bakta	EggNOG-Mapper	EggNOG-Mapper	EggNOG-Mapper
GCA_000498795.2	PGAP	Bakta	Bakta	PGAP	Bakta	Bakta/PGAP/Prokka	PGAP	Bakta	Bakta	Prokka	Prokka	Prokka	Bakta	EggNOG-Mapper	EggNOG-Mapper	EggNOG-Mapper
GCA_000498815.2	PGAP	Bakta	Bakta	PGAP	Bakta	Bakta/PGAP/Prokka	PGAP	Bakta	Bakta	Prokka	Prokka	Prokka	EggNOG-Mapper	EggNOG-Mapper	EggNOG-Mapper	EggNOG-Mapper
GCA_000498835.2	PGAP	Bakta	Bakta	PGAP	Bakta/PGAP/Prokka	Bakta/PGAP/Prokka	PGAP	Bakta	Bakta	Prokka	Prokka	Prokka	Bakta	EggNOG-Mapper	EggNOG-Mapper	EggNOG-Mapper
GCA_000498875.2	PGAP	Bakta	Bakta	PGAP	Bakta/PGAP/Prokka	Bakta/PGAP/Prokka	PGAP	Bakta	Bakta	Prokka	Prokka	Prokka	Bakta	EggNOG-Mapper	EggNOG-Mapper	EggNOG-Mapper
GCA_000499485.1	PGAP	Bakta	Bakta	Bakta/PGAP/Prokka	Bakta	Bakta/PGAP/Prokka	PGAP	Bakta	Bakta	Prokka	Prokka	Prokka	Bakta	EggNOG-Mapper	EggNOG-Mapper	EggNOG-Mapper
GCA_000500815.1	PGAP	Bakta	Bakta	PGAP	Bakta/PGAP/Prokka	Bakta/PGAP/Prokka	PGAP	PGAP	Bakta	Prokka	Prokka	Prokka	EggNOG-Mapper	EggNOG-Mapper	EggNOG-Mapper	EggNOG-Mapper
GCA_000500835.1	PGAP	Bakta	Bakta	PGAP	Bakta/PGAP/Prokka	Bakta/PGAP/Prokka	PGAP	PGAP	Bakta	Prokka	Prokka	Prokka	EggNOG-Mapper	EggNOG-Mapper	EggNOG-Mapper	EggNOG-Mapper
GCA_000500855.1	PGAP	Bakta	Bakta	PGAP	Bakta/PGAP/Prokka	Bakta/PGAP/Prokka	PGAP	PGAP	Bakta	Prokka	Prokka	Prokka	EggNOG-Mapper	EggNOG-Mapper	EggNOG-Mapper	EggNOG-Mapper
GCA_000500875.1	PGAP	Bakta	Bakta	PGAP	Bakta	Bakta/PGAP/Prokka	PGAP	PGAP	Bakta	Prokka	Prokka	Prokka	EggNOG-Mapper	EggNOG-Mapper	EggNOG-Mapper	EggNOG-Mapper
GCA_000500895.1	PGAP	Bakta	Bakta	PGAP	Bakta/PGAP/Prokka	Bakta/PGAP/Prokka	PGAP	PGAP	Bakta	Prokka	Prokka	Prokka	EggNOG-Mapper	EggNOG-Mapper	EggNOG-Mapper	EggNOG-Mapper
GCA_000503255.1	PGAP	Bakta	Bakta	PGAP	Bakta	Bakta/PGAP/Prokka	PGAP	PGAP	Bakta	Prokka	Prokka	Prokka	EggNOG-Mapper	EggNOG-Mapper	EggNOG-Mapper	EggNOG-Mapper
GCA_000503275.1	PGAP	Bakta	Bakta	PGAP	Bakta	Bakta/PGAP/Prokka	PGAP	Bakta	Bakta	Prokka	Prokka	Prokka	Bakta	Bakta	EggNOG-Mapper	EggNOG-Mapper
GCA_000503295.1	PGAP	Bakta	Bakta	PGAP	Bakta	Bakta/PGAP/Prokka	PGAP	Bakta	Bakta	Prokka	Prokka	Prokka	Bakta	EggNOG-Mapper	EggNOG-Mapper	EggNOG-Mapper
GCA_000503315.1	PGAP	Bakta	Bakta	PGAP	Bakta	Bakta/PGAP/Prokka	PGAP	Bakta	Bakta	Prokka	Prokka	Prokka	Bakta	Bakta	EggNOG-Mapper	EggNOG-Mapper
GCA_000503335.1	PGAP	Bakta	Bakta	Bakta/PGAP/Prokka	Bakta	Bakta/PGAP/Prokka	PGAP	Bakta	Bakta	Prokka	Prokka	Prokka	Bakta	Bakta	EggNOG-Mapper	EggNOG-Mapper
GCA_000503355.1	PGAP	Bakta	Bakta	PGAP	Bakta	Bakta/PGAP/Prokka	PGAP	Bakta	Bakta	Prokka	Prokka	Prokka	Bakta	Bakta	EggNOG-Mapper	EggNOG-Mapper
GCA_000503375.1	PGAP	Bakta	Bakta	PGAP	Bakta	Bakta/PGAP/Prokka	PGAP	PGAP	Bakta	Prokka	Prokka	Prokka	Bakta	Bakta	EggNOG-Mapper	EggNOG-Mapper
GCA_000503395.1	PGAP	Bakta	Bakta	PGAP	Bakta	Bakta/PGAP/Prokka	PGAP	Bakta	Bakta	Prokka	Prokka	Prokka	Bakta	Bakta	EggNOG-Mapper	EggNOG-Mapper
GCA_000503415.1	PGAP	Bakta	Bakta	Bakta/PGAP/Prokka	Bakta	Bakta/PGAP/Prokka	PGAP	Bakta	Bakta	Prokka	Prokka	Prokka	Bakta	Bakta	EggNOG-Mapper	EggNOG-Mapper
GCA_000503435.1	PGAP	Bakta	Bakta	PGAP	Bakta	Bakta/PGAP/Prokka	PGAP	Bakta	Bakta	Prokka	Prokka	Prokka	Bakta	Bakta	EggNOG-Mapper	EggNOG-Mapper
GCA_000503455.1	PGAP	Bakta	Bakta	PGAP	Bakta	Bakta/PGAP/Prokka	PGAP	PGAP	Bakta	Prokka	Prokka	Prokka	EggNOG-Mapper	Bakta	EggNOG-Mapper	EggNOG-Mapper
GCA_000503475.1	PGAP	Bakta	Bakta	Bakta/PGAP/Prokka	Bakta	Bakta/PGAP/Prokka	PGAP	Bakta	Bakta	Prokka	Prokka	Prokka	EggNOG-Mapper	EggNOG-Mapper	EggNOG-Mapper	EggNOG-Mapper
GCA_000503495.1	PGAP	Bakta	Bakta	PGAP	Bakta	Bakta/PGAP/Prokka	PGAP	PGAP	Bakta	Prokka	Prokka	Prokka	Bakta	Bakta	EggNOG-Mapper	EggNOG-Mapper
GCA_000503515.1	PGAP	Bakta	Bakta	Bakta/PGAP	Bakta	Bakta/PGAP/Prokka	PGAP	Bakta	Bakta	Prokka	Prokka	Prokka	Bakta	EggNOG-Mapper	EggNOG-Mapper	EggNOG-Mapper
GCA_000503535.1	PGAP	Bakta	Bakta	PGAP	Bakta	Bakta/PGAP/Prokka	PGAP	PGAP	Bakta	Prokka	Prokka	Prokka	Bakta	Bakta	EggNOG-Mapper	EggNOG-Mapper
GCA_000503555.1	PGAP	Bakta	Bakta	PGAP	Bakta	Bakta/PGAP/Prokka	PGAP	Bakta	Bakta	Prokka	Prokka	Prokka	Bakta	Bakta	EggNOG-Mapper	EggNOG-Mapper
GCA_000503575.1	PGAP	Bakta	Bakta	PGAP	Bakta	Bakta/PGAP/Prokka	PGAP	Bakta	Bakta	Prokka	Prokka	Prokka	Bakta	Bakta	EggNOG-Mapper	EggNOG-Mapper
GCA_000503595.1	PGAP	Bakta	Bakta	PGAP	Bakta	Bakta/PGAP/Prokka	PGAP	PGAP	Bakta	Prokka	Prokka	Prokka	Bakta	EggNOG-Mapper	EggNOG-Mapper	EggNOG-Mapper
GCA_000503635.1	PGAP	Bakta	Bakta	PGAP	Bakta	Bakta/PGAP/Prokka	PGAP	Bakta	Bakta	Prokka	Prokka	Prokka	Bakta	EggNOG-Mapper	EggNOG-Mapper	EggNOG-Mapper
GCA_000503655.1	PGAP	Bakta	Bakta	PGAP	Bakta	Bakta/PGAP/Prokka	PGAP	PGAP	Bakta	Prokka	Prokka	Prokka	Bakta	EggNOG-Mapper	EggNOG-Mapper	EggNOG-Mapper
GCA_000503675.1	PGAP	Bakta	Bakta	PGAP	Bakta	Bakta/PGAP/Prokka	PGAP	PGAP	Bakta	Prokka	Prokka	Prokka	Bakta	EggNOG-Mapper	EggNOG-Mapper	EggNOG-Mapper
GCA_000503695.1	PGAP	Bakta	Bakta	PGAP	Bakta	Bakta/PGAP/Prokka	PGAP	PGAP	Bakta	Prokka	Prokka	Prokka	Bakta	Bakta	EggNOG-Mapper	EggNOG-Mapper
GCA_000503715.1	PGAP	Bakta	Bakta	PGAP	Bakta	Bakta/PGAP/Prokka	PGAP	Bakta	Bakta	Prokka	Prokka	Prokka	Bakta	Bakta	EggNOG-Mapper	EggNOG-Mapper
GCA_000506445.2	PGAP	Bakta	Bakta	PGAP	Bakta/PGAP/Prokka	Bakta/PGAP/Prokka	PGAP	Bakta	Bakta	Prokka	Prokka	Prokka	Bakta	EggNOG-Mapper	EggNOG-Mapper	EggNOG-Mapper
GCA_000506465.2	PGAP	Bakta	Bakta	PGAP	Bakta	Bakta/PGAP/Prokka	PGAP	Bakta	Bakta	Prokka	Prokka	Bakta	Bakta	EggNOG-Mapper	EggNOG-Mapper	EggNOG-Mapper
GCA_000506485.2	PGAP	Bakta	Bakta	PGAP	Bakta	Bakta/PGAP/Prokka	PGAP	Bakta	Bakta	Prokka	Prokka	Prokka	Bakta	EggNOG-Mapper	EggNOG-Mapper	EggNOG-Mapper
GCA_000506505.1	PGAP	Bakta	Bakta	PGAP	Bakta/PGAP/Prokka	Bakta/PGAP/Prokka	PGAP	Bakta	Bakta	Prokka	Prokka	Prokka	Bakta	EggNOG-Mapper	EggNOG-Mapper	EggNOG-Mapper
GCA_000506585.2	PGAP	Bakta	Bakta	PGAP	Bakta	Bakta/PGAP/Prokka	PGAP	Bakta	Bakta	Prokka	Prokka	Prokka	Bakta	EggNOG-Mapper	EggNOG-Mapper	EggNOG-Mapper
GCA_000506845.1	PGAP	Bakta	Bakta	PGAP	Bakta	Bakta/PGAP/Prokka	PGAP	Bakta	Bakta	Prokka	Prokka	Prokka	Bakta	Bakta	EggNOG-Mapper	EggNOG-Mapper
GCA_000507605.1	PGAP	Bakta	Bakta	PGAP	Bakta	Bakta/PGAP/Prokka	PGAP	Bakta	Bakta	EggNOG-Mapper	Prokka	Prokka	Bakta	EggNOG-Mapper	EggNOG-Mapper	EggNOG-Mapper
GCA_000507625.1	PGAP	Bakta	Bakta	Bakta/Prokka	Bakta	Bakta/PGAP/Prokka	PGAP	Bakta	Bakta	EggNOG-Mapper	Prokka	Prokka	Bakta	EggNOG-Mapper	EggNOG-Mapper	EggNOG-Mapper
GCA_000507645.1	PGAP	Bakta	Bakta	PGAP	Bakta/PGAP/Prokka	Bakta/PGAP/Prokka	PGAP	Bakta	Bakta	EggNOG-Mapper	Prokka	Prokka	Bakta	EggNOG-Mapper	EggNOG-Mapper	EggNOG-Mapper
GCA_000507665.1	PGAP	Bakta	Bakta	Bakta/PGAP/Prokka	Bakta	Bakta/PGAP/Prokka	PGAP	Bakta	Bakta	PGAP	Prokka	Prokka	Bakta	EggNOG-Mapper	EggNOG-Mapper	EggNOG-Mapper
GCA_000507685.1	PGAP	Bakta	Bakta	Prokka	Bakta/PGAP/Prokka	Bakta/PGAP/Prokka	PGAP	Bakta	Bakta	EggNOG-Mapper	Prokka	Prokka	Bakta	EggNOG-Mapper	EggNOG-Mapper	EggNOG-Mapper
GCA_000508365.1	PGAP	Bakta	Bakta	PGAP	Bakta	Bakta/PGAP/Prokka	PGAP	PGAP	Bakta	Prokka	Prokka	Prokka	Bakta	Bakta	EggNOG-Mapper	EggNOG-Mapper
GCA_000508385.1	PGAP	Bakta	Bakta	PGAP	Bakta	Bakta/PGAP/Prokka	PGAP	PGAP	Bakta	Prokka	Prokka	Prokka	Bakta	Bakta	EggNOG-Mapper	EggNOG-Mapper
GCA_000511425.1	PGAP	Bakta	Bakta	PGAP	Bakta	Bakta/PGAP/Prokka	PGAP	Bakta	Bakta	Prokka	Prokka	Prokka	Bakta	Bakta	EggNOG-Mapper	EggNOG-Mapper
GCA_000511445.1	PGAP	Bakta	Bakta	PGAP	Bakta/PGAP/Prokka	Bakta/PGAP/Prokka	PGAP	Bakta	Bakta	Prokka	Prokka	Prokka	Bakta	EggNOG-Mapper	EggNOG-Mapper	EggNOG-Mapper
GCA_000511465.1	PGAP	Bakta	Bakta	PGAP	Bakta	Bakta/PGAP/Prokka	PGAP	Bakta	Bakta	Prokka	Prokka	Prokka	Bakta	Bakta	EggNOG-Mapper	EggNOG-Mapper
GCA_000511485.1	PGAP	Bakta	Bakta	PGAP	Bakta	Bakta/PGAP/Prokka	PGAP	Bakta	Bakta	Prokka	Prokka	Prokka	Bakta	EggNOG-Mapper	EggNOG-Mapper	EggNOG-Mapper
GCA_000511505.1	PGAP	Bakta	Bakta	PGAP	Bakta	Bakta/PGAP/Prokka	PGAP	Bakta	Bakta	Prokka	Prokka	Prokka	Bakta	EggNOG-Mapper	EggNOG-Mapper	EggNOG-Mapper
GCA_000511525.1	PGAP	Bakta	Bakta	PGAP	Bakta	Bakta/PGAP/Prokka	PGAP	Bakta	Bakta	Prokka	Prokka	Prokka	Bakta	EggNOG-Mapper	EggNOG-Mapper	EggNOG-Mapper
GCA_000511545.1	PGAP	Bakta	Bakta	PGAP	Bakta	Bakta/PGAP/Prokka	PGAP	Bakta	Bakta	Prokka	Prokka	Prokka	Bakta	EggNOG-Mapper	EggNOG-Mapper	EggNOG-Mapper
GCA_000511565.1	PGAP	Bakta	Bakta	PGAP	Bakta	Bakta/PGAP/Prokka	PGAP	Bakta	Bakta	Prokka	Prokka	Prokka	Bakta	EggNOG-Mapper	EggNOG-Mapper	EggNOG-Mapper
GCA_000512625.1	PGAP	Bakta	Bakta	Bakta/PGAP/Prokka	Bakta	Bakta/PGAP/Prokka	PGAP	Bakta	Bakta	Prokka	Prokka	Prokka	Bakta	EggNOG-Mapper	EggNOG-Mapper	EggNOG-Mapper
GCA_000513035.1	PGAP	Bakta	Bakta	Bakta/PGAP/Prokka	Bakta	Bakta/PGAP/Prokka	PGAP	Bakta	Bakta	Prokka	Prokka	Prokka	Bakta	EggNOG-Mapper	EggNOG-Mapper	EggNOG-Mapper
GCA_000513375.1	PGAP	Bakta	Bakta	PGAP	Bakta	Bakta/PGAP/Prokka	PGAP	PGAP	Bakta	Prokka	Prokka	Prokka	EggNOG-Mapper	EggNOG-Mapper	EggNOG-Mapper	EggNOG-Mapper
GCA_000513455.1	PGAP	Bakta	Bakta	PGAP	Bakta	Bakta/PGAP/Prokka	PGAP	PGAP	Bakta	Prokka	Prokka	Prokka	EggNOG-Mapper	EggNOG-Mapper	EggNOG-Mapper	EggNOG-Mapper
GCA_000517165.1	PGAP	Bakta	Bakta	Bakta/PGAP/Prokka	Bakta	Bakta/PGAP/Prokka	PGAP	Bakta	Bakta	Prokka	Prokka	EggNOG-Mapper	Bakta	EggNOG-Mapper	EggNOG-Mapper	EggNOG-Mapper
GCA_000517245.1	PGAP	Bakta	Bakta	PGAP	Bakta	Bakta/PGAP/Prokka	PGAP	Bakta	Bakta	Prokka	Prokka	Prokka	Bakta	EggNOG-Mapper	EggNOG-Mapper	EggNOG-Mapper
GCA_000520035.1	PGAP	Bakta	Bakta	Bakta/PGAP/Prokka	Bakta	Bakta/PGAP/Prokka	PGAP	Bakta	Bakta	PGAP	Prokka	Prokka	Bakta	EggNOG-Mapper	EggNOG-Mapper	EggNOG-Mapper
GCA_000520055.1	PGAP	Bakta	Bakta	Bakta/PGAP/Prokka	Bakta	Bakta/PGAP/Prokka	PGAP	Bakta	Bakta	PGAP	Prokka	Prokka	Bakta	EggNOG-Mapper	EggNOG-Mapper	EggNOG-Mapper
GCA_000522085.1	PGAP	Bakta	Bakta	Bakta/Prokka	Bakta	Bakta/PGAP/Prokka	PGAP	Bakta	Bakta	EggNOG-Mapper	Prokka	Prokka	Bakta	EggNOG-Mapper	EggNOG-Mapper	EggNOG-Mapper
GCA_000522105.1	PGAP	Bakta	Bakta	Bakta/PGAP/Prokka	Bakta	Bakta/PGAP/Prokka	PGAP	Bakta	Bakta	PGAP	Prokka	Prokka	Bakta	EggNOG-Mapper	EggNOG-Mapper	EggNOG-Mapper
GCA_000522125.1	PGAP	Bakta	Bakta	Bakta/PGAP/Prokka	Bakta	Bakta/PGAP/Prokka	PGAP	Bakta	Bakta	PGAP	Prokka	Prokka	Bakta	EggNOG-Mapper	EggNOG-Mapper	EggNOG-Mapper
GCA_000522145.1	PGAP	Bakta	Bakta	Bakta/Prokka	Bakta	Bakta/PGAP/Prokka	PGAP	Bakta	Bakta	EggNOG-Mapper	Prokka	Prokka	Bakta	EggNOG-Mapper	EggNOG-Mapper	EggNOG-Mapper
GCA_000522165.1	PGAP	Bakta	Bakta	PGAP	Bakta	Bakta/PGAP/Prokka	PGAP	Bakta	Bakta	PGAP	Prokka	Prokka	Bakta	EggNOG-Mapper	EggNOG-Mapper	EggNOG-Mapper
GCA_000522185.2	PGAP	Bakta	Bakta	Bakta/PGAP/Prokka	Bakta	Bakta/PGAP/Prokka	PGAP	Bakta	Bakta	PGAP	Prokka	Prokka	Bakta	EggNOG-Mapper	EggNOG-Mapper	EggNOG-Mapper
GCA_000522205.1	PGAP	Bakta	Bakta	Prokka	Bakta	Bakta/PGAP/Prokka	PGAP	Bakta	Bakta	PGAP	Prokka	Prokka	Bakta	EggNOG-Mapper	EggNOG-Mapper	EggNOG-Mapper
GCA_000522225.1	PGAP	Bakta	Bakta	Bakta/PGAP/Prokka	Bakta	Bakta/PGAP/Prokka	PGAP	Bakta	Bakta	PGAP	Prokka	Prokka	Bakta	EggNOG-Mapper	EggNOG-Mapper	EggNOG-Mapper
GCA_000522245.1	PGAP	Bakta	Bakta	Bakta/PGAP/Prokka	Bakta	Bakta/PGAP/Prokka	PGAP	Bakta	Bakta	EggNOG-Mapper	Prokka	Prokka	Bakta	EggNOG-Mapper	EggNOG-Mapper	EggNOG-Mapper
GCA_000522265.1	PGAP	Bakta	Bakta	Bakta/Prokka	Bakta	Bakta/PGAP/Prokka	PGAP	Bakta	Bakta	EggNOG-Mapper	Prokka	Prokka	Bakta	EggNOG-Mapper	EggNOG-Mapper	EggNOG-Mapper
GCA_000522285.1	PGAP	Bakta	Bakta	PGAP	Bakta	Bakta/PGAP/Prokka	PGAP	Bakta	Bakta	PGAP	Prokka	Prokka	Bakta	EggNOG-Mapper	EggNOG-Mapper	EggNOG-Mapper
GCA_000522305.1	PGAP	Bakta	Bakta	Bakta/Prokka	Bakta	Bakta/PGAP/Prokka	PGAP	Bakta	Bakta	PGAP	Prokka	Prokka	Bakta	EggNOG-Mapper	EggNOG-Mapper	EggNOG-Mapper
GCA_000522325.1	PGAP	Bakta	Bakta	Bakta/PGAP/Prokka	Bakta/PGAP/Prokka	Bakta/PGAP/Prokka	PGAP	Bakta	Bakta	EggNOG-Mapper	Prokka	Prokka	Bakta	EggNOG-Mapper	EggNOG-Mapper	EggNOG-Mapper
GCA_000522345.1	PGAP	Bakta	Bakta	Bakta/PGAP/Prokka	Bakta	Bakta/PGAP/Prokka	PGAP	Bakta	Bakta	PGAP	Prokka	Prokka	Bakta	EggNOG-Mapper	EggNOG-Mapper	EggNOG-Mapper
GCA_000522365.1	PGAP	Bakta	Bakta	Bakta/Prokka	Bakta/PGAP/Prokka	Bakta/PGAP/Prokka	PGAP	Bakta	Bakta	PGAP	Prokka	Prokka	Bakta	EggNOG-Mapper	EggNOG-Mapper	EggNOG-Mapper
GCA_000522385.1	PGAP	Bakta	Bakta	Bakta/Prokka	Bakta/PGAP/Prokka	Bakta/PGAP/Prokka	PGAP	Bakta	Bakta	PGAP	Prokka	Prokka	Bakta	EggNOG-Mapper	EggNOG-Mapper	EggNOG-Mapper
GCA_000522405.1	PGAP	Bakta	Bakta	Bakta/PGAP/Prokka	Bakta	Bakta/PGAP/Prokka	PGAP	Bakta	Bakta	PGAP	Prokka	Prokka	Bakta	EggNOG-Mapper	EggNOG-Mapper	EggNOG-Mapper
GCA_000529355.1	PGAP	Bakta	Bakta	PGAP	Bakta	Bakta/PGAP/Prokka	PGAP	Bakta	Bakta	Prokka	Prokka	Prokka	Bakta	EggNOG-Mapper	EggNOG-Mapper	EggNOG-Mapper
GCA_000529555.1	PGAP	Bakta	Bakta	PGAP	Bakta	Bakta/PGAP/Prokka	PGAP	PGAP	Bakta	PGAP	Prokka	Prokka	EggNOG-Mapper	EggNOG-Mapper	EggNOG-Mapper	EggNOG-Mapper
GCA_000529615.1	PGAP	Bakta	Bakta	PGAP	Bakta	Bakta/PGAP/Prokka	PGAP	Bakta	Bakta	Prokka	Prokka	Prokka	EggNOG-Mapper	EggNOG-Mapper	EggNOG-Mapper	EggNOG-Mapper
GCA_000529855.1	PGAP	Bakta	Bakta	PGAP	Bakta	Bakta/PGAP/Prokka	PGAP	PGAP	Bakta	PGAP	Prokka	Prokka	EggNOG-Mapper	EggNOG-Mapper	EggNOG-Mapper	EggNOG-Mapper
GCA_000529975.1	PGAP	Bakta	Bakta	PGAP	Bakta	Bakta/PGAP/Prokka	PGAP	Bakta	Bakta	Prokka	Prokka	Prokka	EggNOG-Mapper	EggNOG-Mapper	EggNOG-Mapper	EggNOG-Mapper
GCA_000564835.2	PGAP	Bakta	Bakta	Bakta/PGAP/Prokka	Bakta/PGAP/Prokka	Bakta/PGAP/Prokka	PGAP	Bakta	Bakta	EggNOG-Mapper	Prokka	Prokka	Bakta	EggNOG-Mapper	EggNOG-Mapper	EggNOG-Mapper
GCA_000576655.2	PGAP	Bakta	Bakta	PGAP	Bakta	Bakta/PGAP/Prokka	PGAP	Bakta	Bakta	EggNOG-Mapper	Prokka	Prokka	Bakta	EggNOG-Mapper	EggNOG-Mapper	EggNOG-Mapper
GCA_000586515.1	PGAP	Bakta	Bakta	PGAP	Bakta	Bakta/PGAP/Prokka	PGAP	Bakta	Bakta	Prokka	Prokka	Prokka	Bakta	EggNOG-Mapper	EggNOG-Mapper	EggNOG-Mapper
GCA_000597845.1	PGAP	Bakta	Bakta	Bakta/Prokka	Bakta/PGAP/Prokka	Bakta/PGAP/Prokka	PGAP	Bakta	Bakta	PGAP	Prokka	Prokka	Bakta	EggNOG-Mapper	EggNOG-Mapper	EggNOG-Mapper
GCA_000599625.1	PGAP	Bakta	Bakta	Prokka	Bakta/PGAP/Prokka	Bakta/PGAP/Prokka	PGAP	Bakta	Bakta	PGAP	Prokka	Prokka	Bakta	EggNOG-Mapper	EggNOG-Mapper	EggNOG-Mapper
GCA_000599645.1	PGAP	Bakta	Bakta	Bakta/Prokka	Bakta/PGAP/Prokka	Bakta/PGAP/Prokka	PGAP	Bakta	Bakta	PGAP	Prokka	Prokka	Bakta	EggNOG-Mapper	EggNOG-Mapper	EggNOG-Mapper
GCA_000599665.1	PGAP	Bakta	Bakta	Bakta/Prokka	Bakta	Bakta/PGAP/Prokka	PGAP	Bakta	Bakta	Prokka	Prokka	Prokka	Bakta	EggNOG-Mapper	EggNOG-Mapper	EggNOG-Mapper
GCA_000599685.1	PGAP	Bakta	Bakta	Bakta/Prokka	Bakta	Bakta/PGAP/Prokka	PGAP	Bakta	Bakta	Prokka	Prokka	Prokka	Bakta	EggNOG-Mapper	EggNOG-Mapper	EggNOG-Mapper
GCA_000599705.1	PGAP	Bakta	Bakta	Prokka	Bakta	Bakta/PGAP/Prokka	PGAP	Bakta	Bakta	PGAP	Prokka	Prokka	EggNOG-Mapper	EggNOG-Mapper	EggNOG-Mapper	EggNOG-Mapper
GCA_000599725.2	PGAP	Bakta	Bakta	PGAP	Bakta	Bakta/PGAP/Prokka	PGAP	Bakta	Bakta	Prokka	Prokka	Prokka	Bakta	EggNOG-Mapper	EggNOG-Mapper	EggNOG-Mapper
GCA_000599745.2	PGAP	Bakta	Bakta	PGAP	Bakta/PGAP/Prokka	Bakta/PGAP/Prokka	PGAP	Bakta	Bakta	Prokka	Prokka	Prokka	Bakta	EggNOG-Mapper	EggNOG-Mapper	EggNOG-Mapper
GCA_000599765.2	PGAP	Bakta	Bakta	PGAP	Bakta/PGAP/Prokka	Bakta/PGAP/Prokka	PGAP	PGAP	Bakta	Prokka	Prokka	Prokka	EggNOG-Mapper	EggNOG-Mapper	EggNOG-Mapper	EggNOG-Mapper
GCA_000599785.2	PGAP	Bakta	Bakta	PGAP	Bakta	Bakta/PGAP/Prokka	PGAP	Bakta	Bakta	Prokka	Prokka	Prokka	Bakta	EggNOG-Mapper	EggNOG-Mapper	EggNOG-Mapper
GCA_000599805.2	PGAP	Bakta	Bakta	PGAP	Bakta	Bakta/PGAP/Prokka	PGAP	Bakta	Bakta	Prokka	Prokka	Prokka	Bakta	EggNOG-Mapper	EggNOG-Mapper	EggNOG-Mapper
GCA_000599825.1	PGAP	Bakta	Bakta	PGAP	Bakta	Bakta/PGAP/Prokka	PGAP	Bakta	Bakta	Prokka	Prokka	Prokka	Bakta	EggNOG-Mapper	EggNOG-Mapper	EggNOG-Mapper
GCA_000601135.1	PGAP	Bakta	Bakta	PGAP	Bakta	Bakta/PGAP/Prokka	PGAP	Bakta	Bakta	Prokka	Prokka	Prokka	Bakta	EggNOG-Mapper	EggNOG-Mapper	EggNOG-Mapper
GCA_000601155.1	PGAP	Bakta	Bakta	PGAP	Bakta	Bakta/PGAP/Prokka	PGAP	Bakta	Bakta	Prokka	Prokka	Prokka	Bakta	EggNOG-Mapper	EggNOG-Mapper	EggNOG-Mapper
GCA_000601175.1	PGAP	Bakta	Bakta	PGAP	Bakta	Bakta/PGAP/Prokka	PGAP	Bakta	Bakta	Prokka	Prokka	Prokka	Bakta	EggNOG-Mapper	EggNOG-Mapper	EggNOG-Mapper
GCA_000601195.1	PGAP	Bakta	Bakta	PGAP	Bakta	Bakta/PGAP/Prokka	PGAP	Bakta	Bakta	Prokka	Prokka	Prokka	EggNOG-Mapper	EggNOG-Mapper	EggNOG-Mapper	EggNOG-Mapper
GCA_000601215.1	PGAP	Bakta	Bakta	Bakta/PGAP	Bakta	Bakta/PGAP/Prokka	PGAP	Bakta	Bakta	Prokka	Prokka	Prokka	Bakta	EggNOG-Mapper	EggNOG-Mapper	EggNOG-Mapper
GCA_000601235.1	PGAP	Bakta	Bakta	PGAP	Bakta	Bakta/PGAP/Prokka	PGAP	Bakta	Bakta	Prokka	Prokka	Prokka	Bakta	EggNOG-Mapper	EggNOG-Mapper	EggNOG-Mapper
GCA_000601255.2	PGAP	Bakta	Bakta	PGAP	Bakta/PGAP/Prokka	Bakta/PGAP/Prokka	PGAP	Bakta	Bakta	Prokka	Prokka	Prokka	Bakta	EggNOG-Mapper	EggNOG-Mapper	EggNOG-Mapper
GCA_000601275.1	PGAP	Bakta	Bakta	PGAP	Bakta	Bakta/PGAP/Prokka	PGAP	Bakta	Bakta	PGAP	Prokka	Prokka	Bakta	EggNOG-Mapper	EggNOG-Mapper	EggNOG-Mapper
GCA_000601295.1	PGAP	Bakta	Bakta	PGAP	Bakta	Bakta/PGAP/Prokka	PGAP	Bakta	Bakta	Prokka	Prokka	Prokka	Bakta	EggNOG-Mapper	EggNOG-Mapper	EggNOG-Mapper
GCA_000601315.1	PGAP	Bakta	Bakta	PGAP	Bakta	Bakta/PGAP/Prokka	PGAP	Bakta	Bakta	Prokka	Prokka	Prokka	Bakta	EggNOG-Mapper	EggNOG-Mapper	EggNOG-Mapper
GCA_000601335.1	PGAP	Bakta	Bakta	PGAP	Bakta	Bakta/PGAP/Prokka	PGAP	Bakta	Bakta	Prokka	Prokka	Prokka	Bakta	EggNOG-Mapper	EggNOG-Mapper	EggNOG-Mapper
GCA_000601355.1	PGAP	Bakta	Bakta	Bakta/PGAP/Prokka	Bakta	Bakta/PGAP/Prokka	PGAP	Bakta	Bakta	PGAP	Prokka	Prokka	EggNOG-Mapper	EggNOG-Mapper	EggNOG-Mapper	EggNOG-Mapper
GCA_000607285.1	PGAP	Bakta	Bakta	PGAP	Bakta	Bakta/PGAP/Prokka	PGAP	Bakta	Bakta	EggNOG-Mapper	Prokka	Prokka	Bakta	EggNOG-Mapper	EggNOG-Mapper	EggNOG-Mapper
GCA_000613265.1	PGAP	Bakta	Bakta	Bakta/PGAP/Prokka	Bakta/PGAP/Prokka	Bakta/PGAP/Prokka	PGAP	PGAP	Bakta	PGAP	Prokka	EggNOG-Mapper	EggNOG-Mapper	EggNOG-Mapper	EggNOG-Mapper	EggNOG-Mapper
GCA_000614035.2	PGAP	Bakta	Bakta	Bakta/PGAP/Prokka	Bakta	Bakta/PGAP/Prokka	PGAP	Bakta	Bakta	Prokka	Prokka	Prokka	Bakta	EggNOG-Mapper	EggNOG-Mapper	EggNOG-Mapper
GCA_000614085.2	PGAP	Bakta	Bakta	Bakta/PGAP/Prokka	Bakta	Bakta/PGAP/Prokka	PGAP	Bakta	Bakta	Prokka	Prokka	Prokka	Bakta	EggNOG-Mapper	EggNOG-Mapper	EggNOG-Mapper
GCA_000614215.2	PGAP	Bakta	Bakta	Bakta/PGAP/Prokka	Bakta	Bakta/PGAP/Prokka	PGAP	Bakta	Bakta	Prokka	Prokka	Prokka	Bakta	EggNOG-Mapper	EggNOG-Mapper	EggNOG-Mapper
GCA_000614255.1	PGAP	Bakta	Bakta	PGAP	Bakta	Bakta/PGAP/Prokka	PGAP	Bakta	Bakta	Prokka	Prokka	Prokka	Bakta	EggNOG-Mapper	EggNOG-Mapper	EggNOG-Mapper
GCA_000614305.2	PGAP	Bakta	Bakta	Bakta/PGAP/Prokka	Bakta	Bakta/PGAP/Prokka	PGAP	Bakta	Bakta	Prokka	Prokka	Prokka	Bakta	EggNOG-Mapper	EggNOG-Mapper	EggNOG-Mapper
GCA_000614345.2	PGAP	Bakta	Bakta	Bakta/PGAP/Prokka	Bakta	Bakta/PGAP/Prokka	PGAP	Bakta	Bakta	Prokka	Prokka	Prokka	Bakta	EggNOG-Mapper	EggNOG-Mapper	EggNOG-Mapper
GCA_000614405.2	PGAP	Bakta	Bakta	Bakta/PGAP/Prokka	Bakta	Bakta/PGAP/Prokka	PGAP	Bakta	Bakta	Prokka	Prokka	Prokka	Bakta	EggNOG-Mapper	EggNOG-Mapper	EggNOG-Mapper
GCA_000614425.1	PGAP	Bakta	Bakta	Bakta/PGAP/Prokka	Bakta	Bakta/PGAP/Prokka	PGAP	PGAP	Bakta	PGAP	Prokka	EggNOG-Mapper	EggNOG-Mapper	EggNOG-Mapper	EggNOG-Mapper	EggNOG-Mapper
GCA_000614435.2	PGAP	Bakta	Bakta	Bakta/PGAP/Prokka	Bakta	Bakta/PGAP/Prokka	PGAP	Bakta	Bakta	Prokka	Prokka	Prokka	Bakta	EggNOG-Mapper	EggNOG-Mapper	EggNOG-Mapper
GCA_000614465.2	PGAP	Bakta	Bakta	Bakta/PGAP/Prokka	Bakta	Bakta/PGAP/Prokka	PGAP	Bakta	Bakta	Prokka	Prokka	Prokka	EggNOG-Mapper	EggNOG-Mapper	EggNOG-Mapper	EggNOG-Mapper
GCA_000614505.1	PGAP	Bakta	Bakta	Bakta/PGAP/Prokka	Bakta/PGAP/Prokka	Bakta/PGAP/Prokka	PGAP	PGAP	Bakta	PGAP	Prokka	EggNOG-Mapper	EggNOG-Mapper	EggNOG-Mapper	EggNOG-Mapper	EggNOG-Mapper
GCA_000614515.1	PGAP	Bakta	Bakta	PGAP	Bakta	Bakta/PGAP/Prokka	PGAP	Bakta	Bakta	Prokka	Prokka	Prokka	Bakta	EggNOG-Mapper	EggNOG-Mapper	EggNOG-Mapper
GCA_000614565.2	PGAP	Bakta	Bakta	Bakta/PGAP/Prokka	Bakta	Bakta/PGAP/Prokka	PGAP	Bakta	Bakta	Prokka	Prokka	Prokka	Bakta	EggNOG-Mapper	EggNOG-Mapper	EggNOG-Mapper
GCA_000614595.1	PGAP	Bakta	Bakta	Bakta/PGAP/Prokka	Bakta	Bakta/PGAP/Prokka	PGAP	Bakta	Bakta	Prokka	Prokka	Prokka	Bakta	EggNOG-Mapper	EggNOG-Mapper	EggNOG-Mapper
GCA_000614625.1	PGAP	Bakta	Bakta	Bakta/PGAP/Prokka	Bakta	Bakta/PGAP/Prokka	PGAP	PGAP	Bakta	PGAP	Prokka	EggNOG-Mapper	EggNOG-Mapper	EggNOG-Mapper	EggNOG-Mapper	EggNOG-Mapper
GCA_000614645.2	PGAP	Bakta	Bakta	Bakta/PGAP/Prokka	Bakta	Bakta/PGAP/Prokka	PGAP	Bakta	Bakta	Prokka	Prokka	Prokka	Bakta	EggNOG-Mapper	EggNOG-Mapper	EggNOG-Mapper
GCA_000614685.2	PGAP	Bakta	Bakta	Bakta/PGAP/Prokka	Bakta	Bakta/PGAP/Prokka	PGAP	Bakta	Bakta	Prokka	Prokka	Prokka	Bakta	EggNOG-Mapper	EggNOG-Mapper	EggNOG-Mapper
GCA_000614725.2	PGAP	Bakta	Bakta	Bakta/PGAP/Prokka	Bakta	Bakta/PGAP/Prokka	PGAP	Bakta	Bakta	Prokka	Prokka	Prokka	Bakta	EggNOG-Mapper	EggNOG-Mapper	EggNOG-Mapper
GCA_000614765.2	PGAP	Bakta	Bakta	Bakta/PGAP/Prokka	Bakta	Bakta/PGAP/Prokka	PGAP	Bakta	Bakta	Prokka	Prokka	Prokka	Bakta	EggNOG-Mapper	EggNOG-Mapper	EggNOG-Mapper
GCA_000614805.2	PGAP	Bakta	Bakta	Bakta/PGAP/Prokka	Bakta	Bakta/PGAP/Prokka	PGAP	Bakta	Bakta	Prokka	Prokka	Prokka	Bakta	EggNOG-Mapper	EggNOG-Mapper	EggNOG-Mapper
GCA_000614845.2	PGAP	Bakta	Bakta	Bakta/PGAP/Prokka	Bakta	Bakta/PGAP/Prokka	PGAP	Bakta	Bakta	Prokka	Prokka	Prokka	Bakta	EggNOG-Mapper	EggNOG-Mapper	EggNOG-Mapper
GCA_000614885.2	PGAP	Bakta	Bakta	Bakta/PGAP/Prokka	Bakta	Bakta/PGAP/Prokka	PGAP	Bakta	Bakta	Prokka	Prokka	Prokka	Bakta	EggNOG-Mapper	EggNOG-Mapper	EggNOG-Mapper
GCA_000614925.2	PGAP	Bakta	Bakta	Bakta/PGAP/Prokka	Bakta	Bakta/PGAP/Prokka	PGAP	Bakta	Bakta	Prokka	Prokka	Prokka	Bakta	EggNOG-Mapper	EggNOG-Mapper	EggNOG-Mapper
GCA_000614965.1	PGAP	Bakta	Bakta	PGAP	Bakta	Bakta/PGAP/Prokka	PGAP	Bakta	Bakta	Prokka	Prokka	Prokka	Bakta	EggNOG-Mapper	EggNOG-Mapper	EggNOG-Mapper
GCA_000615015.1	PGAP	Bakta	Bakta	PGAP	Bakta	Bakta/PGAP/Prokka	PGAP	Bakta	Bakta	Prokka	Prokka	Prokka	Bakta	EggNOG-Mapper	EggNOG-Mapper	EggNOG-Mapper
GCA_000615055.1	PGAP	Bakta	Bakta	PGAP	Bakta	Bakta/PGAP/Prokka	PGAP	Bakta	Bakta	Prokka	Prokka	Prokka	Bakta	EggNOG-Mapper	EggNOG-Mapper	EggNOG-Mapper
GCA_000615085.1	PGAP	Bakta	Bakta	PGAP	Bakta	Bakta/PGAP/Prokka	PGAP	Bakta	Bakta	Prokka	Prokka	Prokka	Bakta	EggNOG-Mapper	EggNOG-Mapper	EggNOG-Mapper
GCA_000615145.1	PGAP	Bakta	Bakta	PGAP	Bakta	Bakta/PGAP/Prokka	PGAP	Bakta	Bakta	Prokka	Prokka	Prokka	Bakta	EggNOG-Mapper	EggNOG-Mapper	EggNOG-Mapper
GCA_000615175.1	PGAP	Bakta	Bakta	PGAP	Bakta	Bakta/PGAP/Prokka	PGAP	Bakta	Bakta	Prokka	Prokka	Prokka	Bakta	EggNOG-Mapper	EggNOG-Mapper	EggNOG-Mapper
GCA_000615225.2	PGAP	Bakta	Bakta	Bakta/PGAP/Prokka	Bakta	Bakta/PGAP/Prokka	PGAP	Bakta	Bakta	Prokka	Prokka	Prokka	Bakta	EggNOG-Mapper	EggNOG-Mapper	EggNOG-Mapper
GCA_000615265.1	PGAP	Bakta	Bakta	PGAP	Bakta	Bakta/PGAP/Prokka	PGAP	Bakta	Bakta	Prokka	Prokka	Prokka	Bakta	EggNOG-Mapper	EggNOG-Mapper	EggNOG-Mapper
GCA_000615305.1	PGAP	Bakta	Bakta	PGAP	Bakta	Bakta/PGAP/Prokka	PGAP	Bakta	Bakta	Prokka	Prokka	Prokka	Bakta	EggNOG-Mapper	EggNOG-Mapper	EggNOG-Mapper
GCA_000615345.1	PGAP	Bakta	Bakta	PGAP	Bakta	Bakta/PGAP/Prokka	PGAP	Bakta	Bakta	Prokka	Prokka	Prokka	Bakta	EggNOG-Mapper	EggNOG-Mapper	EggNOG-Mapper
GCA_000615385.1	PGAP	Bakta	Bakta	PGAP	Bakta	Bakta/PGAP/Prokka	PGAP	Bakta	Bakta	Prokka	Prokka	Prokka	Bakta	EggNOG-Mapper	EggNOG-Mapper	EggNOG-Mapper
GCA_000615415.2	PGAP	Bakta	Bakta	Bakta/PGAP/Prokka	Bakta	Bakta/PGAP/Prokka	PGAP	Bakta	Bakta	Prokka	Prokka	Prokka	Bakta	EggNOG-Mapper	EggNOG-Mapper	EggNOG-Mapper
GCA_000615455.2	PGAP	Bakta	Bakta	Bakta/PGAP/Prokka	Bakta	Bakta/PGAP/Prokka	PGAP	Bakta	Bakta	Prokka	Prokka	Prokka	Bakta	EggNOG-Mapper	EggNOG-Mapper	EggNOG-Mapper
GCA_000615505.1	PGAP	Bakta	Bakta	PGAP	Bakta	Bakta/PGAP/Prokka	PGAP	Bakta	Bakta	Prokka	Prokka	Prokka	EggNOG-Mapper	EggNOG-Mapper	EggNOG-Mapper	EggNOG-Mapper
GCA_000615535.1	PGAP	Bakta	Bakta	PGAP	Bakta	Bakta/PGAP/Prokka	PGAP	Bakta	Bakta	PGAP	Prokka	Prokka	Bakta	EggNOG-Mapper	EggNOG-Mapper	EggNOG-Mapper
GCA_000615575.2	PGAP	Bakta	Bakta	Bakta/PGAP/Prokka	Bakta	Bakta/PGAP/Prokka	PGAP	Bakta	Bakta	Prokka	Prokka	Prokka	Bakta	EggNOG-Mapper	EggNOG-Mapper	EggNOG-Mapper
GCA_000615605.2	PGAP	Bakta	Bakta	Bakta/PGAP/Prokka	Bakta	Bakta/PGAP/Prokka	PGAP	Bakta	Bakta	Prokka	Prokka	Prokka	Bakta	EggNOG-Mapper	EggNOG-Mapper	EggNOG-Mapper
GCA_000615655.2	PGAP	Bakta	Bakta	Bakta/PGAP/Prokka	Bakta	Bakta/PGAP/Prokka	PGAP	Bakta	Bakta	Prokka	Prokka	Prokka	Bakta	EggNOG-Mapper	EggNOG-Mapper	EggNOG-Mapper
GCA_000615695.1	PGAP	Bakta	Bakta	Bakta/PGAP/Prokka	Bakta	Bakta/PGAP/Prokka	PGAP	Bakta	Bakta	Prokka	Prokka	Prokka	Bakta	EggNOG-Mapper	EggNOG-Mapper	EggNOG-Mapper
GCA_000615745.2	PGAP	Bakta	Bakta	Bakta/PGAP/Prokka	Bakta	Bakta/PGAP/Prokka	PGAP	Bakta	Bakta	Prokka	Prokka	Prokka	Bakta	EggNOG-Mapper	EggNOG-Mapper	EggNOG-Mapper
GCA_000615785.2	PGAP	Bakta	Bakta	PGAP	Bakta	Bakta/PGAP/Prokka	PGAP	Bakta	Bakta	Prokka	Prokka	Prokka	Bakta	EggNOG-Mapper	EggNOG-Mapper	EggNOG-Mapper
GCA_000615815.2	PGAP	Bakta	Bakta	PGAP	Bakta	Bakta/PGAP/Prokka	PGAP	Bakta	Bakta	Prokka	Prokka	Prokka	Bakta	EggNOG-Mapper	EggNOG-Mapper	EggNOG-Mapper
GCA_000615865.2	PGAP	Bakta	Bakta	PGAP	Bakta	Bakta/PGAP/Prokka	PGAP	Bakta	Bakta	Prokka	Prokka	Prokka	Bakta	EggNOG-Mapper	EggNOG-Mapper	EggNOG-Mapper
GCA_000615925.2	PGAP	Bakta	Bakta	PGAP	Bakta	Bakta/PGAP/Prokka	PGAP	Bakta	Bakta	Prokka	Prokka	Prokka	Bakta	EggNOG-Mapper	EggNOG-Mapper	EggNOG-Mapper
GCA_000615965.2	PGAP	Bakta	Bakta	PGAP	Bakta	Bakta/PGAP/Prokka	PGAP	Bakta	Bakta	Prokka	Prokka	Prokka	Bakta	EggNOG-Mapper	EggNOG-Mapper	EggNOG-Mapper
GCA_000616005.2	PGAP	Bakta	Bakta	PGAP	Bakta	Bakta/PGAP/Prokka	PGAP	Bakta	Bakta	Prokka	Prokka	Prokka	Bakta	EggNOG-Mapper	EggNOG-Mapper	EggNOG-Mapper
GCA_000616035.2	PGAP	Bakta	Bakta	Bakta/PGAP/Prokka	Bakta	Bakta/PGAP/Prokka	PGAP	Bakta	Bakta	Prokka	Prokka	Prokka	Bakta	EggNOG-Mapper	EggNOG-Mapper	EggNOG-Mapper
GCA_000616075.2	PGAP	Bakta	Bakta	Bakta/PGAP/Prokka	Bakta	Bakta/PGAP/Prokka	PGAP	Bakta	Bakta	Prokka	Prokka	Prokka	Bakta	EggNOG-Mapper	EggNOG-Mapper	EggNOG-Mapper
GCA_000616135.2	PGAP	Bakta	Bakta	Bakta/PGAP/Prokka	Bakta	Bakta/PGAP/Prokka	PGAP	Bakta	Bakta	Prokka	Prokka	Prokka	Bakta	EggNOG-Mapper	EggNOG-Mapper	EggNOG-Mapper
GCA_000616195.2	PGAP	Bakta	Bakta	Bakta/PGAP/Prokka	Bakta	Bakta/PGAP/Prokka	PGAP	Bakta	Bakta	Prokka	Prokka	Prokka	Bakta	EggNOG-Mapper	EggNOG-Mapper	EggNOG-Mapper
GCA_000616225.2	PGAP	Bakta	Bakta	Bakta/PGAP/Prokka	Bakta	Bakta/PGAP/Prokka	PGAP	Bakta	Bakta	Prokka	Prokka	Prokka	Bakta	EggNOG-Mapper	EggNOG-Mapper	EggNOG-Mapper
GCA_000616245.1	PGAP	Bakta	Bakta	Bakta/PGAP/Prokka	Bakta	Bakta/PGAP/Prokka	PGAP	Bakta	Bakta	Prokka	Prokka	Prokka	Bakta	EggNOG-Mapper	EggNOG-Mapper	EggNOG-Mapper
GCA_000616265.1	PGAP	Bakta	Bakta	Bakta/PGAP/Prokka	Bakta	Bakta/PGAP/Prokka	PGAP	Bakta	Bakta	Prokka	Prokka	Prokka	Bakta	EggNOG-Mapper	EggNOG-Mapper	EggNOG-Mapper
GCA_000616285.1	PGAP	Bakta	Bakta	PGAP	Bakta	Bakta/PGAP/Prokka	PGAP	Bakta	Bakta	Prokka	Prokka	Prokka	Bakta	EggNOG-Mapper	EggNOG-Mapper	EggNOG-Mapper
GCA_000616305.2	PGAP	Bakta	Bakta	Bakta/PGAP/Prokka	Bakta	Bakta/PGAP/Prokka	PGAP	Bakta	Bakta	Prokka	Prokka	Prokka	Bakta	EggNOG-Mapper	EggNOG-Mapper	EggNOG-Mapper
GCA_000616325.2	PGAP	Bakta	Bakta	Bakta/PGAP/Prokka	Bakta	Bakta/PGAP/Prokka	PGAP	Bakta	Bakta	Prokka	Prokka	Prokka	Bakta	EggNOG-Mapper	EggNOG-Mapper	EggNOG-Mapper
GCA_000616345.2	PGAP	Bakta	Bakta	Bakta/PGAP/Prokka	Bakta	Bakta/PGAP/Prokka	PGAP	PGAP	Bakta	Prokka	Prokka	Prokka	Bakta	EggNOG-Mapper	EggNOG-Mapper	EggNOG-Mapper
GCA_000616365.1	PGAP	Bakta	Bakta	PGAP	Bakta	Bakta/PGAP/Prokka	PGAP	Bakta	Bakta	Prokka	Prokka	Prokka	Bakta	EggNOG-Mapper	EggNOG-Mapper	EggNOG-Mapper
GCA_000616385.2	PGAP	Bakta	Bakta	Bakta/PGAP/Prokka	Bakta	Bakta/PGAP/Prokka	PGAP	Bakta	Bakta	Prokka	Prokka	Prokka	Bakta	EggNOG-Mapper	EggNOG-Mapper	EggNOG-Mapper
GCA_000616405.2	PGAP	Bakta	Bakta	Bakta/PGAP/Prokka	Bakta	Bakta/PGAP/Prokka	PGAP	Bakta	Bakta	Prokka	Prokka	Prokka	Bakta	EggNOG-Mapper	EggNOG-Mapper	EggNOG-Mapper
GCA_000616425.2	PGAP	Bakta	Bakta	Bakta/PGAP/Prokka	Bakta	Bakta/PGAP/Prokka	PGAP	Bakta	Bakta	Prokka	Prokka	Prokka	Bakta	EggNOG-Mapper	EggNOG-Mapper	EggNOG-Mapper
GCA_000616445.2	PGAP	Bakta	Bakta	Bakta/PGAP/Prokka	Bakta	Bakta/PGAP/Prokka	PGAP	Bakta	Bakta	Prokka	Prokka	Prokka	Bakta	EggNOG-Mapper	EggNOG-Mapper	EggNOG-Mapper
GCA_000616465.2	PGAP	Bakta	Bakta	Bakta/PGAP/Prokka	Bakta	Bakta/PGAP/Prokka	PGAP	Bakta	Bakta	Prokka	Prokka	Prokka	Bakta	EggNOG-Mapper	EggNOG-Mapper	EggNOG-Mapper
GCA_000616485.2	PGAP	Bakta	Bakta	Bakta/PGAP/Prokka	Bakta	Bakta/PGAP/Prokka	PGAP	Bakta	Bakta	Prokka	Prokka	Prokka	Bakta	EggNOG-Mapper	EggNOG-Mapper	EggNOG-Mapper
GCA_000616505.2	PGAP	Bakta	Bakta	Bakta/PGAP/Prokka	Bakta	Bakta/PGAP/Prokka	PGAP	Bakta	Bakta	Prokka	Prokka	Prokka	Bakta	EggNOG-Mapper	EggNOG-Mapper	EggNOG-Mapper
GCA_000616525.2	PGAP	Bakta	Bakta	Bakta/PGAP/Prokka	Bakta	Bakta/PGAP/Prokka	PGAP	Bakta	Bakta	Prokka	Prokka	Prokka	Bakta	EggNOG-Mapper	EggNOG-Mapper	EggNOG-Mapper
GCA_000616545.2	PGAP	Bakta	Bakta	Bakta/PGAP/Prokka	Bakta	Bakta/PGAP/Prokka	PGAP	Bakta	Bakta	Prokka	Prokka	Prokka	Bakta	EggNOG-Mapper	EggNOG-Mapper	EggNOG-Mapper
GCA_000616565.1	PGAP	Bakta	Bakta	PGAP	Bakta	Bakta/PGAP/Prokka	PGAP	Bakta	Bakta	Prokka	Prokka	Prokka	Bakta	EggNOG-Mapper	EggNOG-Mapper	EggNOG-Mapper
GCA_000616585.2	PGAP	Bakta	Bakta	Bakta/PGAP/Prokka	Bakta	Bakta/PGAP/Prokka	PGAP	Bakta	Bakta	Prokka	Prokka	Prokka	Bakta	EggNOG-Mapper	EggNOG-Mapper	EggNOG-Mapper
GCA_000616605.2	PGAP	Bakta	Bakta	Bakta/PGAP/Prokka	Bakta	Bakta/PGAP/Prokka	PGAP	Bakta	Bakta	Prokka	Prokka	Prokka	Bakta	EggNOG-Mapper	EggNOG-Mapper	EggNOG-Mapper
GCA_000616625.1	PGAP	Bakta	Bakta	PGAP	Bakta	Bakta/PGAP/Prokka	PGAP	Bakta	Bakta	Prokka	Prokka	Prokka	Bakta	EggNOG-Mapper	EggNOG-Mapper	EggNOG-Mapper
GCA_000616645.2	PGAP	Bakta	Bakta	Bakta/PGAP/Prokka	Bakta	Bakta/PGAP/Prokka	PGAP	Bakta	Bakta	Prokka	Prokka	Prokka	Bakta	EggNOG-Mapper	EggNOG-Mapper	EggNOG-Mapper
GCA_000616665.2	PGAP	Bakta	Bakta	Bakta/PGAP/Prokka	Bakta	Bakta/PGAP/Prokka	PGAP	Bakta	Bakta	Prokka	Prokka	Prokka	Bakta	EggNOG-Mapper	EggNOG-Mapper	EggNOG-Mapper
GCA_000616685.2	PGAP	Bakta	Bakta	Bakta/PGAP/Prokka	Bakta	Bakta/PGAP/Prokka	PGAP	Bakta	Bakta	Prokka	Prokka	Prokka	Bakta	EggNOG-Mapper	EggNOG-Mapper	EggNOG-Mapper
GCA_000616705.2	PGAP	Bakta	Bakta	Bakta/PGAP/Prokka	Bakta	Bakta/PGAP/Prokka	PGAP	Bakta	Bakta	Prokka	Prokka	Prokka	Bakta	EggNOG-Mapper	EggNOG-Mapper	EggNOG-Mapper
GCA_000616725.2	PGAP	Bakta	Bakta	Bakta/PGAP/Prokka	Bakta	Bakta/PGAP/Prokka	PGAP	Bakta	Bakta	Prokka	Prokka	Prokka	Bakta	EggNOG-Mapper	EggNOG-Mapper	EggNOG-Mapper
GCA_000616745.1	PGAP	Bakta	Bakta	Bakta/PGAP/Prokka	Bakta	Bakta/PGAP/Prokka	PGAP	Bakta	Bakta	Prokka	Prokka	Prokka	Bakta	EggNOG-Mapper	EggNOG-Mapper	EggNOG-Mapper
GCA_000617005.2	PGAP	Bakta	Bakta	Bakta/PGAP/Prokka	Bakta	Bakta/PGAP/Prokka	PGAP	Bakta	Bakta	Prokka	Prokka	Prokka	Bakta	EggNOG-Mapper	EggNOG-Mapper	EggNOG-Mapper
GCA_000617025.2	PGAP	Bakta	Bakta	Bakta/PGAP/Prokka	Bakta	Bakta/PGAP/Prokka	PGAP	Bakta	Bakta	Prokka	Prokka	Prokka	Bakta	EggNOG-Mapper	EggNOG-Mapper	EggNOG-Mapper
GCA_000617045.2	PGAP	Bakta	Bakta	Bakta/PGAP/Prokka	Bakta	Bakta/PGAP/Prokka	PGAP	Bakta	Bakta	Prokka	Prokka	Prokka	Bakta	EggNOG-Mapper	EggNOG-Mapper	EggNOG-Mapper
GCA_000617065.1	PGAP	Bakta	Bakta	PGAP	Bakta	Bakta/PGAP/Prokka	PGAP	Bakta	Bakta	Prokka	Prokka	Prokka	Bakta	EggNOG-Mapper	EggNOG-Mapper	EggNOG-Mapper
GCA_000617085.1	PGAP	Bakta	Bakta	PGAP	Bakta	Bakta/PGAP/Prokka	PGAP	Bakta	Bakta	Prokka	Prokka	Prokka	Bakta	EggNOG-Mapper	EggNOG-Mapper	EggNOG-Mapper
GCA_000617105.1	PGAP	Bakta	Bakta	PGAP	Bakta	Bakta/PGAP/Prokka	PGAP	Bakta	Bakta	Prokka	Prokka	Prokka	Bakta	EggNOG-Mapper	EggNOG-Mapper	EggNOG-Mapper
GCA_000617125.2	PGAP	Bakta	Bakta	Bakta/PGAP/Prokka	Bakta	Bakta/PGAP/Prokka	PGAP	Bakta	Bakta	Prokka	Prokka	Prokka	Bakta	EggNOG-Mapper	EggNOG-Mapper	EggNOG-Mapper
GCA_000617145.2	PGAP	Bakta	Bakta	Bakta/PGAP/Prokka	Bakta	Bakta/PGAP/Prokka	PGAP	Bakta	Bakta	Prokka	Prokka	Prokka	EggNOG-Mapper	EggNOG-Mapper	EggNOG-Mapper	EggNOG-Mapper
GCA_000617165.2	PGAP	Bakta	Bakta	Bakta/PGAP/Prokka	Bakta/PGAP/Prokka	Bakta/PGAP/Prokka	PGAP	PGAP	Bakta	PGAP	Prokka	Prokka	EggNOG-Mapper	EggNOG-Mapper	EggNOG-Mapper	EggNOG-Mapper
GCA_000617185.2	PGAP	Bakta	Bakta	Bakta/PGAP/Prokka	Bakta	Bakta/PGAP/Prokka	PGAP	Bakta	Bakta	Prokka	Prokka	Prokka	Bakta	EggNOG-Mapper	EggNOG-Mapper	EggNOG-Mapper
GCA_000617205.1	PGAP	Bakta	Bakta	PGAP	Bakta	Bakta/PGAP/Prokka	PGAP	Bakta	Bakta	Prokka	Prokka	Prokka	Bakta	EggNOG-Mapper	EggNOG-Mapper	EggNOG-Mapper
GCA_000617225.1	PGAP	Bakta	Bakta	PGAP	Bakta/PGAP/Prokka	Bakta/PGAP/Prokka	PGAP	Bakta	Bakta	Prokka	Prokka	Prokka	Bakta	EggNOG-Mapper	EggNOG-Mapper	EggNOG-Mapper
GCA_000617245.2	PGAP	Bakta	Bakta	Bakta/PGAP/Prokka	Bakta	Bakta/PGAP/Prokka	PGAP	Bakta	Bakta	Prokka	Prokka	Prokka	Bakta	EggNOG-Mapper	EggNOG-Mapper	EggNOG-Mapper
GCA_000617265.1	PGAP	Bakta	Bakta	Bakta/PGAP/Prokka	Bakta	Bakta/PGAP/Prokka	PGAP	Bakta	Bakta	Prokka	Prokka	Prokka	Bakta	EggNOG-Mapper	EggNOG-Mapper	EggNOG-Mapper
GCA_000617285.2	PGAP	Bakta	Bakta	Bakta/PGAP/Prokka	Bakta	Bakta/PGAP/Prokka	PGAP	Bakta	Bakta	Prokka	Prokka	Prokka	Bakta	EggNOG-Mapper	EggNOG-Mapper	EggNOG-Mapper
GCA_000617305.2	PGAP	Bakta	Bakta	Bakta/PGAP/Prokka	Bakta	Bakta/PGAP/Prokka	PGAP	Bakta	Bakta	Prokka	Prokka	Prokka	Bakta	Bakta	EggNOG-Mapper	EggNOG-Mapper
GCA_000617325.1	PGAP	Bakta	Bakta	PGAP	Bakta	Bakta/PGAP/Prokka	PGAP	Bakta	Bakta	Prokka	Prokka	Prokka	Bakta	EggNOG-Mapper	EggNOG-Mapper	EggNOG-Mapper
GCA_000617345.1	PGAP	Bakta	Bakta	Bakta/PGAP/Prokka	Bakta	Bakta/PGAP/Prokka	PGAP	Bakta	Bakta	Prokka	Prokka	Prokka	Bakta	EggNOG-Mapper	EggNOG-Mapper	EggNOG-Mapper
GCA_000617365.2	PGAP	Bakta	Bakta	Prokka	Bakta	Bakta/PGAP/Prokka	PGAP	Bakta	Bakta	Prokka	Prokka	Prokka	Bakta	EggNOG-Mapper	EggNOG-Mapper	EggNOG-Mapper
GCA_000617385.1	PGAP	Bakta	Bakta	Prokka	Bakta	Bakta/PGAP/Prokka	PGAP	PGAP	Bakta	Prokka	Prokka	Prokka	EggNOG-Mapper	EggNOG-Mapper	EggNOG-Mapper	EggNOG-Mapper
GCA_000617405.2	PGAP	Bakta	Bakta	Bakta/PGAP/Prokka	Bakta	Bakta/PGAP/Prokka	PGAP	Bakta	Bakta	Prokka	Prokka	Prokka	Bakta	EggNOG-Mapper	EggNOG-Mapper	EggNOG-Mapper
GCA_000617425.1	PGAP	Bakta	Bakta	PGAP	Bakta	Bakta/PGAP/Prokka	PGAP	Bakta	Bakta	Prokka	Prokka	Prokka	Bakta	EggNOG-Mapper	EggNOG-Mapper	EggNOG-Mapper
GCA_000617445.2	PGAP	Bakta	Bakta	Bakta/PGAP/Prokka	Bakta	Bakta/PGAP/Prokka	PGAP	Bakta	Bakta	Prokka	Prokka	Prokka	Bakta	EggNOG-Mapper	EggNOG-Mapper	EggNOG-Mapper
GCA_000617465.2	PGAP	Bakta	Bakta	Bakta/PGAP/Prokka	Bakta	Bakta/PGAP/Prokka	PGAP	Bakta	Bakta	Prokka	Prokka	Prokka	Bakta	EggNOG-Mapper	EggNOG-Mapper	EggNOG-Mapper
GCA_000617485.2	PGAP	Bakta	Bakta	Bakta/PGAP/Prokka	Bakta	Bakta/PGAP/Prokka	PGAP	Bakta	Bakta	Prokka	Prokka	Prokka	Bakta	EggNOG-Mapper	EggNOG-Mapper	EggNOG-Mapper
GCA_000617505.2	PGAP	Bakta	Bakta	Bakta/PGAP/Prokka	Bakta	Bakta/PGAP/Prokka	PGAP	Bakta	Bakta	Prokka	Prokka	Prokka	Bakta	EggNOG-Mapper	EggNOG-Mapper	EggNOG-Mapper
GCA_000617525.2	PGAP	Bakta	Bakta	Bakta/PGAP/Prokka	Bakta	Bakta/PGAP/Prokka	PGAP	Bakta	Bakta	Prokka	Prokka	Prokka	Bakta	EggNOG-Mapper	EggNOG-Mapper	EggNOG-Mapper
GCA_000617545.2	PGAP	Bakta	Bakta	Bakta/PGAP/Prokka	Bakta	Bakta/PGAP/Prokka	PGAP	Bakta	Bakta	Prokka	Prokka	Prokka	Bakta	EggNOG-Mapper	EggNOG-Mapper	EggNOG-Mapper
GCA_000617565.1	PGAP	Bakta	Bakta	Bakta/PGAP/Prokka	Bakta	Bakta/PGAP/Prokka	PGAP	Bakta	Bakta	Prokka	Prokka	Prokka	Bakta	EggNOG-Mapper	EggNOG-Mapper	EggNOG-Mapper
GCA_000617585.1	PGAP	Bakta	Bakta	PGAP	Bakta	Bakta/PGAP/Prokka	PGAP	Bakta	Bakta	PGAP	Prokka	Prokka	EggNOG-Mapper	EggNOG-Mapper	EggNOG-Mapper	EggNOG-Mapper
GCA_000617605.2	PGAP	Bakta	Bakta	Bakta/PGAP/Prokka	Bakta	Bakta/PGAP/Prokka	PGAP	Bakta	Bakta	Prokka	Prokka	Prokka	Bakta	EggNOG-Mapper	EggNOG-Mapper	EggNOG-Mapper
GCA_000617625.2	PGAP	Bakta	Bakta	Bakta/PGAP/Prokka	Bakta	Bakta/PGAP/Prokka	PGAP	Bakta	Bakta	Prokka	Prokka	Prokka	Bakta	EggNOG-Mapper	EggNOG-Mapper	EggNOG-Mapper
GCA_000617645.2	PGAP	Bakta	Bakta	Bakta/PGAP/Prokka	Bakta	Bakta/PGAP/Prokka	PGAP	Bakta	Bakta	Prokka	Prokka	Prokka	Bakta	EggNOG-Mapper	EggNOG-Mapper	EggNOG-Mapper
GCA_000617665.2	PGAP	Bakta	Bakta	Bakta/PGAP/Prokka	Bakta	Bakta/PGAP/Prokka	PGAP	Bakta	Bakta	Prokka	Prokka	Prokka	Bakta	EggNOG-Mapper	EggNOG-Mapper	EggNOG-Mapper
GCA_000617685.1	PGAP	Bakta	Bakta	PGAP	Bakta	Bakta/PGAP/Prokka	PGAP	Bakta	Bakta	Prokka	Prokka	Prokka	Bakta	EggNOG-Mapper	EggNOG-Mapper	EggNOG-Mapper
GCA_000617705.2	PGAP	Bakta	Bakta	Bakta/PGAP/Prokka	Bakta	Bakta/PGAP/Prokka	PGAP	Bakta	Bakta	Prokka	Prokka	Prokka	Bakta	EggNOG-Mapper	EggNOG-Mapper	EggNOG-Mapper
GCA_000617725.2	PGAP	Bakta	Bakta	Bakta/PGAP/Prokka	Bakta	Bakta/PGAP/Prokka	PGAP	Bakta	Bakta	Prokka	Prokka	Prokka	Bakta	EggNOG-Mapper	EggNOG-Mapper	EggNOG-Mapper
GCA_000617745.1	PGAP	Bakta	Bakta	PGAP	Bakta	Bakta/PGAP/Prokka	PGAP	Bakta	Bakta	Prokka	Prokka	Prokka	Bakta	EggNOG-Mapper	EggNOG-Mapper	EggNOG-Mapper
GCA_000617765.2	PGAP	Bakta	Bakta	Bakta/PGAP/Prokka	Bakta	Bakta/PGAP/Prokka	PGAP	Bakta	Bakta	Prokka	Prokka	Prokka	Bakta	EggNOG-Mapper	EggNOG-Mapper	EggNOG-Mapper
GCA_000617785.1	PGAP	Bakta	Bakta	PGAP	Bakta	Bakta/PGAP/Prokka	PGAP	Bakta	Bakta	PGAP	Prokka	Prokka	Bakta	EggNOG-Mapper	EggNOG-Mapper	EggNOG-Mapper
GCA_000617805.2	PGAP	Bakta	Bakta	Bakta/PGAP/Prokka	Bakta	Bakta/PGAP/Prokka	PGAP	Bakta	Bakta	Prokka	Prokka	Prokka	Bakta	EggNOG-Mapper	EggNOG-Mapper	EggNOG-Mapper
GCA_000617965.1	PGAP	Bakta	Bakta	Bakta/PGAP/Prokka	Bakta	Bakta/PGAP/Prokka	PGAP	Bakta	Bakta	Prokka	Prokka	Prokka	Bakta	EggNOG-Mapper	EggNOG-Mapper	EggNOG-Mapper
GCA_000617985.2	PGAP	Bakta	Bakta	Bakta/PGAP/Prokka	Bakta	Bakta/PGAP/Prokka	PGAP	Bakta	Bakta	Prokka	Prokka	Prokka	Bakta	EggNOG-Mapper	EggNOG-Mapper	EggNOG-Mapper
GCA_000618025.1	PGAP	Bakta	Bakta	PGAP	Bakta	Bakta/PGAP/Prokka	PGAP	Bakta	Bakta	Prokka	Prokka	Prokka	Bakta	EggNOG-Mapper	EggNOG-Mapper	EggNOG-Mapper
GCA_000618045.1	PGAP	Bakta	Bakta	Bakta/PGAP/Prokka	Bakta	Bakta/PGAP/Prokka	PGAP	Bakta	Bakta	Prokka	Prokka	Prokka	Bakta	EggNOG-Mapper	EggNOG-Mapper	EggNOG-Mapper
GCA_000618065.2	PGAP	Bakta	Bakta	Bakta/PGAP/Prokka	Bakta	Bakta/PGAP/Prokka	PGAP	Bakta	Bakta	Prokka	Prokka	Prokka	Bakta	EggNOG-Mapper	EggNOG-Mapper	EggNOG-Mapper
GCA_000618085.1	PGAP	Bakta	Bakta	Bakta/PGAP/Prokka	Bakta	Bakta/PGAP/Prokka	PGAP	Bakta	Bakta	Prokka	Prokka	Prokka	Bakta	EggNOG-Mapper	EggNOG-Mapper	EggNOG-Mapper
GCA_000618105.2	PGAP	Bakta	Bakta	Bakta/PGAP/Prokka	Bakta	Bakta/PGAP/Prokka	PGAP	Bakta	Bakta	Prokka	Prokka	Prokka	Bakta	EggNOG-Mapper	EggNOG-Mapper	EggNOG-Mapper
GCA_000618125.1	PGAP	Bakta	Bakta	PGAP	Bakta	Bakta/PGAP/Prokka	PGAP	Bakta	Bakta	Prokka	Prokka	Prokka	Bakta	EggNOG-Mapper	EggNOG-Mapper	EggNOG-Mapper
GCA_000618145.2	PGAP	Bakta	Bakta	Bakta/PGAP/Prokka	Bakta	Bakta/PGAP/Prokka	PGAP	Bakta	Bakta	Prokka	Prokka	Prokka	Bakta	EggNOG-Mapper	EggNOG-Mapper	EggNOG-Mapper
GCA_000618165.2	PGAP	Bakta	Bakta	Bakta/PGAP/Prokka	Bakta	Bakta/PGAP/Prokka	PGAP	Bakta	Bakta	Prokka	Prokka	Prokka	Bakta	EggNOG-Mapper	EggNOG-Mapper	EggNOG-Mapper
GCA_000618185.1	PGAP	Bakta	Bakta	Bakta/PGAP/Prokka	Bakta	Bakta/PGAP/Prokka	PGAP	Bakta	Bakta	Prokka	Prokka	Prokka	Bakta	EggNOG-Mapper	EggNOG-Mapper	EggNOG-Mapper
GCA_000618205.2	PGAP	Bakta	Bakta	Bakta/PGAP/Prokka	Bakta/PGAP/Prokka	Bakta/PGAP/Prokka	PGAP	Bakta	Bakta	Prokka	Prokka	Prokka	Bakta	EggNOG-Mapper	EggNOG-Mapper	EggNOG-Mapper
GCA_000618225.2	PGAP	Bakta	Bakta	Bakta/PGAP/Prokka	Bakta	Bakta/PGAP/Prokka	PGAP	Bakta	Bakta	Prokka	Prokka	Prokka	Bakta	EggNOG-Mapper	EggNOG-Mapper	EggNOG-Mapper
GCA_000618245.1	PGAP	Bakta	Bakta	Bakta/PGAP/Prokka	Bakta	Bakta/PGAP/Prokka	PGAP	Bakta	Bakta	Prokka	Prokka	Prokka	Bakta	EggNOG-Mapper	EggNOG-Mapper	EggNOG-Mapper
GCA_000618265.2	PGAP	Bakta	Bakta	Bakta/PGAP/Prokka	Bakta	Bakta/PGAP/Prokka	PGAP	Bakta	Bakta	Prokka	Prokka	Prokka	Bakta	EggNOG-Mapper	EggNOG-Mapper	EggNOG-Mapper
GCA_000618285.2	PGAP	Bakta	Bakta	Bakta/PGAP/Prokka	Bakta	Bakta/PGAP/Prokka	PGAP	Bakta	Bakta	Prokka	Prokka	Prokka	Bakta	EggNOG-Mapper	EggNOG-Mapper	EggNOG-Mapper
GCA_000618305.2	PGAP	Bakta	Bakta	Bakta/PGAP/Prokka	Bakta	Bakta/PGAP/Prokka	PGAP	Bakta	Bakta	Prokka	Prokka	Prokka	Bakta	EggNOG-Mapper	EggNOG-Mapper	EggNOG-Mapper
GCA_000618325.1	PGAP	Bakta	Bakta	PGAP	Bakta	Bakta/PGAP/Prokka	PGAP	Bakta	Bakta	Prokka	Prokka	Prokka	Bakta	EggNOG-Mapper	EggNOG-Mapper	EggNOG-Mapper
GCA_000618345.1	PGAP	Bakta	Bakta	PGAP	Bakta	Bakta/PGAP/Prokka	PGAP	Bakta	Bakta	Prokka	Prokka	Prokka	Bakta	EggNOG-Mapper	EggNOG-Mapper	EggNOG-Mapper
GCA_000618365.1	PGAP	Bakta	Bakta	Bakta/PGAP/Prokka	Bakta	Bakta/PGAP/Prokka	PGAP	Bakta	Bakta	Prokka	Prokka	Prokka	Bakta	EggNOG-Mapper	EggNOG-Mapper	EggNOG-Mapper
GCA_000618385.1	PGAP	Bakta	Bakta	Bakta/PGAP/Prokka	Bakta	Bakta/PGAP/Prokka	PGAP	Bakta	Bakta	Prokka	Prokka	Prokka	Bakta	EggNOG-Mapper	EggNOG-Mapper	EggNOG-Mapper
GCA_000618405.2	PGAP	Bakta	Bakta	Bakta/PGAP/Prokka	Bakta/PGAP/Prokka	Bakta/PGAP/Prokka	PGAP	Bakta	Bakta	Prokka	Prokka	Prokka	Bakta	EggNOG-Mapper	EggNOG-Mapper	EggNOG-Mapper
GCA_000618425.1	PGAP	Bakta	Bakta	PGAP/Prokka	Bakta	Bakta/PGAP/Prokka	PGAP	Bakta	Bakta	Prokka	Prokka	Prokka	Bakta	EggNOG-Mapper	EggNOG-Mapper	EggNOG-Mapper
GCA_000618445.1	PGAP	Bakta	Bakta	PGAP	Bakta	Bakta/PGAP/Prokka	PGAP	Bakta	Bakta	Prokka	Prokka	Prokka	Bakta	EggNOG-Mapper	EggNOG-Mapper	EggNOG-Mapper
GCA_000618465.1	PGAP	Bakta	Bakta	Prokka	Bakta	Bakta/PGAP/Prokka	PGAP	Bakta	Bakta	Prokka	Prokka	Prokka	Bakta	EggNOG-Mapper	EggNOG-Mapper	EggNOG-Mapper
GCA_000618485.1	PGAP	Bakta	Bakta	Prokka	Bakta	Bakta/PGAP/Prokka	PGAP	Bakta	Bakta	Prokka	Prokka	Prokka	Bakta	EggNOG-Mapper	EggNOG-Mapper	EggNOG-Mapper
GCA_000618505.1	PGAP	Bakta	Bakta	Bakta/PGAP/Prokka	Bakta	Bakta/PGAP/Prokka	PGAP	Bakta	Bakta	Prokka	Prokka	Prokka	Bakta	EggNOG-Mapper	EggNOG-Mapper	EggNOG-Mapper
GCA_000618525.1	PGAP	Bakta	Bakta	PGAP	Bakta	Bakta/PGAP/Prokka	PGAP	Bakta	Bakta	Prokka	Prokka	Prokka	Bakta	EggNOG-Mapper	EggNOG-Mapper	EggNOG-Mapper
GCA_000618545.1	PGAP	Bakta	Bakta	PGAP	Bakta	Bakta/PGAP/Prokka	PGAP	Bakta	Bakta	Prokka	Prokka	Prokka	Bakta	EggNOG-Mapper	EggNOG-Mapper	EggNOG-Mapper
GCA_000618565.1	PGAP	Bakta	Bakta	PGAP	Bakta	Bakta/PGAP/Prokka	PGAP	Bakta	Bakta	Prokka	Prokka	Prokka	Bakta	EggNOG-Mapper	EggNOG-Mapper	EggNOG-Mapper
GCA_000618585.1	PGAP	Bakta	Bakta	PGAP	Bakta	Bakta/PGAP/Prokka	PGAP	Bakta	Bakta	Prokka	Prokka	Prokka	Bakta	EggNOG-Mapper	EggNOG-Mapper	EggNOG-Mapper
GCA_000618605.1	PGAP	Bakta	Bakta	PGAP	Bakta	Bakta/PGAP/Prokka	PGAP	Bakta	Bakta	Prokka	Prokka	Prokka	Bakta	EggNOG-Mapper	EggNOG-Mapper	EggNOG-Mapper
GCA_000618625.1	PGAP	Bakta	Bakta	Bakta/PGAP/Prokka	Bakta	Bakta/PGAP/Prokka	PGAP	Bakta	Bakta	Prokka	Prokka	Prokka	Bakta	EggNOG-Mapper	EggNOG-Mapper	EggNOG-Mapper
GCA_000618645.1	PGAP	Bakta	Bakta	PGAP	Bakta	Bakta/PGAP/Prokka	PGAP	Bakta	Bakta	Prokka	Prokka	Prokka	Bakta	EggNOG-Mapper	EggNOG-Mapper	EggNOG-Mapper
GCA_000618665.1	PGAP	Bakta	Bakta	PGAP	Bakta	Bakta/PGAP/Prokka	PGAP	Bakta	Bakta	Prokka	Prokka	Prokka	Bakta	EggNOG-Mapper	EggNOG-Mapper	EggNOG-Mapper
GCA_000618685.1	PGAP	Bakta	Bakta	PGAP	Bakta	Bakta/PGAP/Prokka	PGAP	Bakta	Bakta	Prokka	Prokka	Prokka	Bakta	EggNOG-Mapper	EggNOG-Mapper	EggNOG-Mapper
GCA_000618705.2	PGAP	Bakta	Bakta	Bakta/PGAP/Prokka	Bakta	Bakta/PGAP/Prokka	PGAP	Bakta	Bakta	Prokka	Prokka	Prokka	Bakta	EggNOG-Mapper	EggNOG-Mapper	EggNOG-Mapper
GCA_000618725.2	PGAP	Bakta	Bakta	Bakta/PGAP/Prokka	Bakta	Bakta/PGAP/Prokka	PGAP	Bakta	Bakta	Prokka	Prokka	Prokka	Bakta	EggNOG-Mapper	EggNOG-Mapper	EggNOG-Mapper
GCA_000618745.1	PGAP	Bakta	Bakta	PGAP	Bakta	Bakta/PGAP/Prokka	PGAP	Bakta	Bakta	Prokka	Prokka	Prokka	Bakta	EggNOG-Mapper	EggNOG-Mapper	EggNOG-Mapper
GCA_000618765.1	PGAP	Bakta	Bakta	PGAP	Bakta	Bakta/PGAP/Prokka	PGAP	Bakta	Bakta	Prokka	Prokka	Prokka	Bakta	EggNOG-Mapper	EggNOG-Mapper	EggNOG-Mapper
GCA_000618785.1	PGAP	Bakta	Bakta	PGAP	Bakta	Bakta/PGAP/Prokka	PGAP	Bakta	Bakta	Prokka	Prokka	Prokka	Bakta	EggNOG-Mapper	EggNOG-Mapper	EggNOG-Mapper
GCA_000618805.1	PGAP	Bakta	Bakta	PGAP	Bakta	Bakta/PGAP/Prokka	PGAP	Bakta	Bakta	Prokka	Prokka	Prokka	Bakta	EggNOG-Mapper	EggNOG-Mapper	EggNOG-Mapper
GCA_000618825.1	PGAP	Bakta	Bakta	PGAP	Bakta	Bakta/PGAP/Prokka	PGAP	Bakta	Bakta	Prokka	Prokka	Prokka	Bakta	EggNOG-Mapper	EggNOG-Mapper	EggNOG-Mapper
GCA_000618845.1	PGAP	Bakta	Bakta	PGAP	Bakta	Bakta/PGAP/Prokka	PGAP	Bakta	Bakta	Prokka	Prokka	Prokka	Bakta	EggNOG-Mapper	EggNOG-Mapper	EggNOG-Mapper
GCA_000618865.1	PGAP	Bakta	Bakta	Bakta/PGAP/Prokka	Bakta	Bakta/PGAP/Prokka	PGAP	Bakta	Bakta	Prokka	Prokka	Prokka	Bakta	EggNOG-Mapper	EggNOG-Mapper	EggNOG-Mapper
GCA_000618885.1	PGAP	Bakta	Bakta	PGAP	Bakta	Bakta/PGAP/Prokka	PGAP	Bakta	Bakta	Prokka	Prokka	Prokka	Bakta	EggNOG-Mapper	EggNOG-Mapper	EggNOG-Mapper
GCA_000618925.2	PGAP	Bakta	Bakta	Bakta/PGAP/Prokka	Bakta	Bakta/PGAP/Prokka	PGAP	Bakta	Bakta	Prokka	Prokka	Prokka	Bakta	EggNOG-Mapper	EggNOG-Mapper	EggNOG-Mapper
GCA_000618945.2	PGAP	Bakta	Bakta	Bakta/PGAP/Prokka	Bakta	Bakta/PGAP/Prokka	PGAP	Bakta	Bakta	Prokka	Prokka	Prokka	Bakta	EggNOG-Mapper	EggNOG-Mapper	EggNOG-Mapper
GCA_000618965.1	PGAP	Bakta	Bakta	PGAP	Bakta	Bakta/PGAP/Prokka	PGAP	Bakta	Bakta	Prokka	Prokka	Prokka	Bakta	EggNOG-Mapper	EggNOG-Mapper	EggNOG-Mapper
GCA_000618985.2	PGAP	Bakta	Bakta	Bakta/PGAP/Prokka	Bakta	Bakta/PGAP/Prokka	PGAP	Bakta	Bakta	Prokka	Prokka	Prokka	Bakta	EggNOG-Mapper	EggNOG-Mapper	EggNOG-Mapper
GCA_000619005.2	PGAP	Bakta	Bakta	Bakta/PGAP/Prokka	Bakta	Bakta/PGAP/Prokka	PGAP	Bakta	Bakta	Prokka	Prokka	Prokka	Bakta	EggNOG-Mapper	EggNOG-Mapper	EggNOG-Mapper
GCA_000619025.1	PGAP	Bakta	Bakta	PGAP	Bakta	Bakta/PGAP/Prokka	PGAP	Bakta	Bakta	Prokka	Prokka	Prokka	Bakta	EggNOG-Mapper	EggNOG-Mapper	EggNOG-Mapper
GCA_000619045.2	PGAP	Bakta	Bakta	Bakta/PGAP/Prokka	Bakta	Bakta/PGAP/Prokka	PGAP	Bakta	Bakta	Prokka	Prokka	Prokka	Bakta	EggNOG-Mapper	EggNOG-Mapper	EggNOG-Mapper
GCA_000619065.2	PGAP	Bakta	Bakta	Bakta/PGAP/Prokka	Bakta	Bakta/PGAP/Prokka	PGAP	Bakta	Bakta	Prokka	Prokka	Prokka	Bakta	EggNOG-Mapper	EggNOG-Mapper	EggNOG-Mapper
GCA_000619085.2	PGAP	Bakta	Bakta	Bakta/PGAP/Prokka	Bakta	Bakta/PGAP/Prokka	PGAP	Bakta	Bakta	Prokka	Prokka	Prokka	Bakta	EggNOG-Mapper	EggNOG-Mapper	EggNOG-Mapper
GCA_000619105.1	PGAP	Bakta	Bakta	PGAP	Bakta	Bakta/PGAP/Prokka	PGAP	Bakta	Bakta	Prokka	Prokka	Prokka	Bakta	EggNOG-Mapper	EggNOG-Mapper	EggNOG-Mapper
GCA_000619125.2	PGAP	Bakta	Bakta	Prokka	Bakta	Bakta/PGAP/Prokka	PGAP	Bakta	Bakta	Prokka	Prokka	Prokka	Bakta	EggNOG-Mapper	EggNOG-Mapper	EggNOG-Mapper
GCA_000619145.1	PGAP	Bakta	Bakta	PGAP	Bakta	Bakta/PGAP/Prokka	PGAP	Bakta	Bakta	Prokka	Prokka	Prokka	Bakta	EggNOG-Mapper	EggNOG-Mapper	EggNOG-Mapper
GCA_000619165.1	PGAP	Bakta	Bakta	Bakta/PGAP/Prokka	Bakta	Bakta/PGAP/Prokka	PGAP	Bakta	Bakta	Prokka	Prokka	Prokka	Bakta	EggNOG-Mapper	EggNOG-Mapper	EggNOG-Mapper
GCA_000619185.1	PGAP	Bakta	Bakta	PGAP	Bakta	Bakta/PGAP/Prokka	PGAP	Bakta	Bakta	Prokka	Prokka	Prokka	Bakta	EggNOG-Mapper	EggNOG-Mapper	EggNOG-Mapper
GCA_000619205.2	PGAP	Bakta	Bakta	Bakta/PGAP/Prokka	Bakta	Bakta/PGAP/Prokka	PGAP	Bakta	Bakta	Prokka	Prokka	Prokka	Bakta	EggNOG-Mapper	EggNOG-Mapper	EggNOG-Mapper
GCA_000619225.2	PGAP	Bakta	Bakta	Bakta/PGAP/Prokka	Bakta	Bakta/PGAP/Prokka	PGAP	Bakta	Bakta	Prokka	Prokka	Prokka	Bakta	EggNOG-Mapper	EggNOG-Mapper	EggNOG-Mapper
GCA_000619245.1	PGAP	Bakta	Bakta	PGAP	Bakta	Bakta/PGAP/Prokka	PGAP	Bakta	Bakta	Prokka	Prokka	Prokka	Bakta	EggNOG-Mapper	EggNOG-Mapper	EggNOG-Mapper
GCA_000619265.2	PGAP	Bakta	Bakta	Bakta/PGAP/Prokka	Bakta	Bakta/PGAP/Prokka	PGAP	Bakta	Bakta	Prokka	Prokka	Prokka	Bakta	EggNOG-Mapper	EggNOG-Mapper	EggNOG-Mapper
GCA_000619285.2	PGAP	Bakta	Bakta	Bakta/PGAP/Prokka	Bakta	Bakta/PGAP/Prokka	PGAP	Bakta	Bakta	Prokka	Prokka	Prokka	Bakta	EggNOG-Mapper	EggNOG-Mapper	EggNOG-Mapper
GCA_000619305.1	PGAP	Bakta	Bakta	PGAP	Bakta	Bakta/PGAP/Prokka	PGAP	Bakta	Bakta	Prokka	Prokka	Prokka	Bakta	EggNOG-Mapper	EggNOG-Mapper	EggNOG-Mapper
GCA_000619325.2	PGAP	Bakta	Bakta	Bakta/PGAP/Prokka	Bakta	Bakta/PGAP/Prokka	PGAP	Bakta	Bakta	Prokka	Prokka	Prokka	Bakta	EggNOG-Mapper	EggNOG-Mapper	EggNOG-Mapper
GCA_000619345.1	PGAP	Bakta	Bakta	PGAP	Bakta	Bakta/PGAP/Prokka	PGAP	Bakta	Bakta	Prokka	Prokka	Prokka	Bakta	EggNOG-Mapper	EggNOG-Mapper	EggNOG-Mapper
GCA_000619365.1	PGAP	Bakta	Bakta	PGAP	Bakta	Bakta/PGAP/Prokka	PGAP	Bakta	Bakta	Prokka	Prokka	Prokka	Bakta	EggNOG-Mapper	EggNOG-Mapper	EggNOG-Mapper
GCA_000619385.1	PGAP	Bakta	Bakta	PGAP	Bakta	Bakta/PGAP/Prokka	PGAP	Bakta	Bakta	Prokka	Prokka	Prokka	Bakta	EggNOG-Mapper	EggNOG-Mapper	EggNOG-Mapper
GCA_000619405.1	PGAP	Bakta	Bakta	PGAP	Bakta	Bakta/PGAP/Prokka	PGAP	Bakta	Bakta	Prokka	Prokka	Prokka	Bakta	EggNOG-Mapper	EggNOG-Mapper	EggNOG-Mapper
GCA_000619425.1	PGAP	Bakta	Bakta	PGAP	Bakta	Bakta/PGAP/Prokka	PGAP	PGAP	Bakta	Prokka	Prokka	Prokka	Bakta	EggNOG-Mapper	EggNOG-Mapper	EggNOG-Mapper
GCA_000619445.1	PGAP	Bakta	Bakta	PGAP	Bakta	Bakta/PGAP/Prokka	PGAP	Bakta	Bakta	Prokka	Prokka	Prokka	Bakta	EggNOG-Mapper	EggNOG-Mapper	EggNOG-Mapper
GCA_000619465.2	PGAP	Bakta	Bakta	Bakta/PGAP/Prokka	Bakta	Bakta/PGAP/Prokka	PGAP	Bakta	Bakta	Prokka	Prokka	Prokka	Bakta	EggNOG-Mapper	EggNOG-Mapper	EggNOG-Mapper
GCA_000619485.1	PGAP	Bakta	Bakta	PGAP	Bakta	Bakta/PGAP/Prokka	PGAP	Bakta	Bakta	Prokka	Prokka	Prokka	Bakta	EggNOG-Mapper	EggNOG-Mapper	EggNOG-Mapper
GCA_000619505.1	PGAP	Bakta	Bakta	PGAP	Bakta	Bakta/PGAP/Prokka	PGAP	Bakta	Bakta	Prokka	Prokka	Prokka	Bakta	EggNOG-Mapper	EggNOG-Mapper	EggNOG-Mapper
GCA_000619525.1	PGAP	Bakta	Bakta	PGAP	Bakta	Bakta/PGAP/Prokka	PGAP	Bakta	Bakta	Prokka	Prokka	Prokka	Bakta	EggNOG-Mapper	EggNOG-Mapper	EggNOG-Mapper
GCA_000619545.2	PGAP	Bakta	Bakta	Bakta/PGAP/Prokka	Bakta	Bakta/PGAP/Prokka	PGAP	Bakta	Bakta	Prokka	Prokka	Prokka	Bakta	EggNOG-Mapper	EggNOG-Mapper	EggNOG-Mapper
GCA_000619565.2	PGAP	Bakta	Bakta	Bakta/PGAP/Prokka	Bakta	Bakta/PGAP/Prokka	PGAP	Bakta	Bakta	Prokka	Prokka	Prokka	Bakta	EggNOG-Mapper	EggNOG-Mapper	EggNOG-Mapper
GCA_000619585.2	PGAP	Bakta	Bakta	Bakta/PGAP/Prokka	Bakta	Bakta/PGAP/Prokka	PGAP	Bakta	Bakta	Prokka	Prokka	Prokka	Bakta	EggNOG-Mapper	EggNOG-Mapper	EggNOG-Mapper
GCA_000619605.1	PGAP	Bakta	Bakta	PGAP	Bakta	Bakta/PGAP/Prokka	PGAP	Bakta	Bakta	Prokka	Prokka	Prokka	Bakta	EggNOG-Mapper	EggNOG-Mapper	EggNOG-Mapper
GCA_000619625.1	PGAP	Bakta	Bakta	Bakta/PGAP/Prokka	Bakta	Bakta/PGAP/Prokka	PGAP	Bakta	Bakta	Prokka	Prokka	Prokka	Bakta	EggNOG-Mapper	EggNOG-Mapper	EggNOG-Mapper
GCA_000619645.2	PGAP	Bakta	Bakta	Bakta/PGAP/Prokka	Bakta	Bakta/PGAP/Prokka	PGAP	Bakta	Bakta	Prokka	Prokka	Prokka	Bakta	EggNOG-Mapper	EggNOG-Mapper	EggNOG-Mapper
GCA_000619665.1	PGAP	Bakta	Bakta	Bakta/PGAP/Prokka	Bakta	Bakta/PGAP/Prokka	PGAP	Bakta	Bakta	Prokka	Prokka	Prokka	Bakta	EggNOG-Mapper	EggNOG-Mapper	EggNOG-Mapper
GCA_000619685.2	PGAP	Bakta	Bakta	Bakta/PGAP/Prokka	Bakta	Bakta/PGAP/Prokka	PGAP	Bakta	Bakta	Prokka	Prokka	Prokka	Bakta	EggNOG-Mapper	EggNOG-Mapper	EggNOG-Mapper
GCA_000619705.2	PGAP	Bakta	Bakta	Bakta/PGAP/Prokka	Bakta	Bakta/PGAP/Prokka	PGAP	Bakta	Bakta	Prokka	Prokka	Prokka	Bakta	EggNOG-Mapper	EggNOG-Mapper	EggNOG-Mapper
GCA_000619725.2	PGAP	Bakta	Bakta	Bakta/PGAP/Prokka	Bakta	Bakta/PGAP/Prokka	PGAP	Bakta	Bakta	Prokka	Prokka	Prokka	Bakta	EggNOG-Mapper	EggNOG-Mapper	EggNOG-Mapper
GCA_000619745.2	PGAP	Bakta	Bakta	Bakta/PGAP/Prokka	Bakta	Bakta/PGAP/Prokka	PGAP	Bakta	Bakta	Prokka	Prokka	Prokka	Bakta	EggNOG-Mapper	EggNOG-Mapper	EggNOG-Mapper
GCA_000619765.2	PGAP	Bakta	Bakta	Bakta/PGAP/Prokka	Bakta	Bakta/PGAP/Prokka	PGAP	Bakta	Bakta	Prokka	Prokka	Prokka	Bakta	EggNOG-Mapper	EggNOG-Mapper	EggNOG-Mapper
GCA_000622265.1	PGAP	Bakta	Bakta	Bakta/PGAP/Prokka	Bakta/PGAP/Prokka	Bakta/PGAP/Prokka	PGAP	Bakta	Bakta	Prokka	Prokka	Prokka	Bakta	EggNOG-Mapper	EggNOG-Mapper	EggNOG-Mapper
GCA_000622285.2	PGAP	Bakta	Bakta	PGAP	Bakta/PGAP/Prokka	Bakta/PGAP/Prokka	PGAP	Bakta	Bakta	PGAP	Prokka	Prokka	Bakta	EggNOG-Mapper	EggNOG-Mapper	EggNOG-Mapper
GCA_000622445.2	PGAP	Bakta	Bakta	Bakta/PGAP/Prokka	Bakta	Bakta/PGAP/Prokka	PGAP	Bakta	Bakta	Prokka	Prokka	Prokka	Bakta	EggNOG-Mapper	EggNOG-Mapper	EggNOG-Mapper
GCA_000622465.2	PGAP	Bakta	Bakta	Bakta/PGAP/Prokka	Bakta	Bakta/PGAP/Prokka	PGAP	Bakta	Bakta	Prokka	Prokka	Prokka	Bakta	EggNOG-Mapper	EggNOG-Mapper	EggNOG-Mapper
GCA_000622485.2	PGAP	Bakta	Bakta	Bakta/PGAP/Prokka	Bakta	Bakta/PGAP/Prokka	PGAP	Bakta	Bakta	Prokka	Prokka	Prokka	Bakta	EggNOG-Mapper	EggNOG-Mapper	EggNOG-Mapper
GCA_000622505.2	PGAP	Bakta	Bakta	Bakta/PGAP/Prokka	Bakta	Bakta/PGAP/Prokka	PGAP	Bakta	Bakta	Prokka	Prokka	Prokka	Bakta	EggNOG-Mapper	EggNOG-Mapper	EggNOG-Mapper
GCA_000622535.2	PGAP	Bakta	Bakta	Bakta/PGAP/Prokka	Bakta	Bakta/PGAP/Prokka	PGAP	Bakta	Bakta	Prokka	Prokka	Prokka	Bakta	EggNOG-Mapper	EggNOG-Mapper	EggNOG-Mapper
GCA_000622555.1	PGAP	Bakta	Bakta	Bakta/PGAP/Prokka	Bakta	Bakta/PGAP/Prokka	PGAP	Bakta	Bakta	Prokka	Prokka	Prokka	Bakta	EggNOG-Mapper	EggNOG-Mapper	EggNOG-Mapper
GCA_000622575.2	PGAP	Bakta	Bakta	Bakta/PGAP/Prokka	Bakta	Bakta/PGAP/Prokka	PGAP	Bakta	Bakta	Prokka	Prokka	Prokka	Bakta	EggNOG-Mapper	EggNOG-Mapper	EggNOG-Mapper
GCA_000622595.2	PGAP	Bakta	Bakta	Bakta/PGAP/Prokka	Bakta	Bakta/PGAP/Prokka	PGAP	Bakta	Bakta	Prokka	Prokka	Prokka	Bakta	EggNOG-Mapper	EggNOG-Mapper	EggNOG-Mapper
GCA_000622615.2	PGAP	Bakta	Bakta	Bakta/PGAP/Prokka	Bakta	Bakta/PGAP/Prokka	PGAP	Bakta	Bakta	Prokka	Prokka	Prokka	Bakta	EggNOG-Mapper	EggNOG-Mapper	EggNOG-Mapper
GCA_000622635.2	PGAP	Bakta	Bakta	Bakta/PGAP/Prokka	Bakta	Bakta/PGAP/Prokka	PGAP	Bakta	Bakta	Prokka	Prokka	Prokka	Bakta	EggNOG-Mapper	EggNOG-Mapper	EggNOG-Mapper
GCA_000622655.2	PGAP	Bakta	Bakta	Bakta/PGAP/Prokka	Bakta	Bakta/PGAP/Prokka	PGAP	Bakta	Bakta	Prokka	Prokka	Prokka	Bakta	EggNOG-Mapper	EggNOG-Mapper	EggNOG-Mapper
GCA_000622675.2	PGAP	Bakta	Bakta	Bakta/PGAP/Prokka	Bakta	Bakta/PGAP/Prokka	PGAP	Bakta	Bakta	Prokka	Prokka	Prokka	Bakta	EggNOG-Mapper	EggNOG-Mapper	EggNOG-Mapper
GCA_000622695.2	PGAP	Bakta	Bakta	Bakta/PGAP/Prokka	Bakta	Bakta/PGAP/Prokka	PGAP	Bakta	Bakta	Prokka	Prokka	Prokka	Bakta	EggNOG-Mapper	EggNOG-Mapper	EggNOG-Mapper
GCA_000622715.2	PGAP	Bakta	Bakta	Bakta/PGAP/Prokka	Bakta	Bakta/PGAP/Prokka	PGAP	Bakta	Bakta	Prokka	Prokka	Prokka	Bakta	EggNOG-Mapper	EggNOG-Mapper	EggNOG-Mapper
GCA_000622735.2	PGAP	Bakta	Bakta	Bakta/PGAP/Prokka	Bakta	Bakta/PGAP/Prokka	PGAP	Bakta	Bakta	Prokka	Prokka	Prokka	Bakta	EggNOG-Mapper	EggNOG-Mapper	EggNOG-Mapper
GCA_000622755.2	PGAP	Bakta	Bakta	Bakta/PGAP/Prokka	Bakta	Bakta/PGAP/Prokka	PGAP	Bakta	Bakta	Prokka	Prokka	Prokka	Bakta	EggNOG-Mapper	EggNOG-Mapper	EggNOG-Mapper
GCA_000622775.2	PGAP	Bakta	Bakta	Bakta/PGAP/Prokka	Bakta	Bakta/PGAP/Prokka	PGAP	Bakta	Bakta	Prokka	Prokka	Prokka	Bakta	EggNOG-Mapper	EggNOG-Mapper	EggNOG-Mapper
GCA_000622795.2	PGAP	Bakta	Bakta	Bakta/PGAP/Prokka	Bakta	Bakta/PGAP/Prokka	PGAP	Bakta	Bakta	Prokka	Prokka	Prokka	Bakta	EggNOG-Mapper	EggNOG-Mapper	EggNOG-Mapper
GCA_000622815.1	PGAP	Bakta	Bakta	PGAP	Bakta	Bakta/PGAP/Prokka	PGAP	Bakta	Bakta	Prokka	Prokka	Prokka	Bakta	EggNOG-Mapper	EggNOG-Mapper	EggNOG-Mapper
GCA_000622835.1	PGAP	Bakta	Bakta	PGAP/Prokka	Bakta	Bakta/PGAP/Prokka	PGAP	Bakta	Bakta	Prokka	Prokka	Prokka	Bakta	EggNOG-Mapper	EggNOG-Mapper	EggNOG-Mapper
GCA_000622855.2	PGAP	Bakta	Bakta	Bakta/PGAP/Prokka	Bakta	Bakta/PGAP/Prokka	PGAP	Bakta	Bakta	Prokka	Prokka	Prokka	Bakta	EggNOG-Mapper	EggNOG-Mapper	EggNOG-Mapper
GCA_000622875.2	PGAP	Bakta	Bakta	Bakta/PGAP/Prokka	Bakta	Bakta/PGAP/Prokka	PGAP	Bakta	Bakta	Prokka	Prokka	Prokka	Bakta	EggNOG-Mapper	EggNOG-Mapper	EggNOG-Mapper
GCA_000627075.1	PGAP	Bakta	Bakta	PGAP	Bakta	Bakta/PGAP/Prokka	PGAP	PGAP	Bakta	Prokka	Prokka	Prokka	EggNOG-Mapper	EggNOG-Mapper	EggNOG-Mapper	EggNOG-Mapper
GCA_000627095.1	PGAP	Bakta	Bakta	PGAP	Bakta	Bakta/PGAP/Prokka	PGAP	Bakta	Bakta	Prokka	Prokka	Prokka	Bakta	EggNOG-Mapper	EggNOG-Mapper	EggNOG-Mapper
GCA_000627135.1	PGAP	Bakta	Bakta	PGAP	Bakta	Bakta/PGAP/Prokka	PGAP	Bakta	Bakta	Prokka	Prokka	Prokka	Bakta	EggNOG-Mapper	EggNOG-Mapper	EggNOG-Mapper
GCA_000627155.1	PGAP	Bakta	Bakta	PGAP	Bakta	Bakta/PGAP/Prokka	PGAP	Bakta	Bakta	Prokka	Prokka	Prokka	Bakta	EggNOG-Mapper	EggNOG-Mapper	EggNOG-Mapper
GCA_000627175.1	PGAP	Bakta	Bakta	PGAP	Bakta	Bakta/PGAP/Prokka	PGAP	Bakta	Bakta	PGAP	Prokka	Prokka	Bakta	EggNOG-Mapper	EggNOG-Mapper	EggNOG-Mapper
GCA_000627195.1	PGAP	Bakta	Bakta	Bakta/PGAP/Prokka	Bakta	Bakta/PGAP/Prokka	PGAP	PGAP	Bakta	Prokka	Prokka	Prokka	EggNOG-Mapper	EggNOG-Mapper	EggNOG-Mapper	EggNOG-Mapper
GCA_000627215.1	PGAP	Bakta	Bakta	PGAP	Bakta	Bakta/PGAP/Prokka	PGAP	Bakta	Bakta	PGAP	Prokka	Prokka	Bakta	EggNOG-Mapper	EggNOG-Mapper	EggNOG-Mapper
GCA_000627235.1	PGAP	Bakta	Bakta	PGAP	Bakta	Bakta/PGAP/Prokka	PGAP	Bakta	Bakta	Prokka	Prokka	Prokka	Bakta	EggNOG-Mapper	EggNOG-Mapper	EggNOG-Mapper
GCA_000627255.1	PGAP	Bakta	Bakta	PGAP	Bakta	Bakta/PGAP/Prokka	PGAP	Bakta	Bakta	Prokka	Prokka	Prokka	Bakta	EggNOG-Mapper	EggNOG-Mapper	EggNOG-Mapper
GCA_000627295.1	PGAP	Bakta	Bakta	PGAP	Bakta/PGAP/Prokka	Bakta/PGAP/Prokka	PGAP	Bakta	Bakta	Prokka	Prokka	Prokka	Bakta	EggNOG-Mapper	EggNOG-Mapper	EggNOG-Mapper
GCA_000627315.1	PGAP	Bakta	Bakta	PGAP	Bakta	Bakta/PGAP/Prokka	PGAP	Bakta	Bakta	Prokka	Prokka	Prokka	Bakta	EggNOG-Mapper	EggNOG-Mapper	EggNOG-Mapper
GCA_000627435.1	PGAP	Bakta	Bakta	PGAP	Bakta	Bakta/PGAP/Prokka	PGAP	Bakta	Bakta	Prokka	Prokka	Prokka	Bakta	EggNOG-Mapper	EggNOG-Mapper	EggNOG-Mapper
GCA_000627455.1	PGAP	Bakta	Bakta	PGAP	Bakta	Bakta/PGAP/Prokka	PGAP	PGAP	Bakta	PGAP	Prokka	Prokka	EggNOG-Mapper	EggNOG-Mapper	EggNOG-Mapper	EggNOG-Mapper
GCA_000627475.1	PGAP	Bakta	Bakta	PGAP	Bakta	Bakta/PGAP/Prokka	PGAP	PGAP	Bakta	PGAP	Prokka	Prokka	EggNOG-Mapper	EggNOG-Mapper	EggNOG-Mapper	EggNOG-Mapper
GCA_000627795.1	PGAP	Bakta	Bakta	PGAP	Bakta	Bakta/PGAP/Prokka	PGAP	Bakta	Bakta	Prokka	Prokka	Prokka	Bakta	EggNOG-Mapper	EggNOG-Mapper	EggNOG-Mapper
GCA_000627815.1	PGAP	Bakta	Bakta	PGAP	Bakta	Bakta/PGAP/Prokka	PGAP	Bakta	Bakta	Prokka	Prokka	Prokka	Bakta	EggNOG-Mapper	EggNOG-Mapper	EggNOG-Mapper
GCA_000627835.1	PGAP	Bakta	Bakta	PGAP	Bakta	Bakta/PGAP/Prokka	PGAP	Bakta	Bakta	Prokka	Prokka	Prokka	Bakta	EggNOG-Mapper	EggNOG-Mapper	EggNOG-Mapper
GCA_000627855.1	PGAP	Bakta	Bakta	PGAP	Bakta	Bakta/PGAP/Prokka	PGAP	Bakta	Bakta	Prokka	Prokka	Prokka	Bakta	EggNOG-Mapper	EggNOG-Mapper	EggNOG-Mapper
GCA_000627885.1	PGAP	Bakta	Bakta	PGAP	Bakta	Bakta/PGAP/Prokka	PGAP	Bakta	Bakta	Prokka	Prokka	Prokka	Bakta	EggNOG-Mapper	EggNOG-Mapper	EggNOG-Mapper
GCA_000627905.1	PGAP	Bakta	Bakta	PGAP	Bakta	Bakta/PGAP/Prokka	PGAP	Bakta	Bakta	Prokka	Prokka	Bakta	Bakta	EggNOG-Mapper	EggNOG-Mapper	EggNOG-Mapper
GCA_000627925.1	PGAP	Bakta	Bakta	PGAP	Bakta	Bakta/PGAP/Prokka	PGAP	Bakta	Bakta	Prokka	Prokka	Prokka	Bakta	EggNOG-Mapper	EggNOG-Mapper	EggNOG-Mapper
GCA_000627945.1	PGAP	Bakta	Bakta	PGAP	Bakta	Bakta/PGAP/Prokka	PGAP	Bakta	Bakta	PGAP	Prokka	Prokka	Bakta	EggNOG-Mapper	EggNOG-Mapper	EggNOG-Mapper
GCA_000627965.1	PGAP	Bakta	Bakta	PGAP	Bakta	Bakta/PGAP/Prokka	PGAP	PGAP	Bakta	PGAP	Prokka	Prokka	EggNOG-Mapper	EggNOG-Mapper	EggNOG-Mapper	EggNOG-Mapper
GCA_000627985.1	PGAP	Bakta	Bakta	PGAP	Bakta	Bakta/PGAP/Prokka	PGAP	Bakta	Bakta	PGAP	Prokka	Prokka	Bakta	EggNOG-Mapper	EggNOG-Mapper	EggNOG-Mapper
GCA_000632555.1	PGAP	Bakta	Bakta	Prokka	Bakta	Bakta/PGAP/Prokka	PGAP	Bakta	Bakta	Prokka	Prokka	Prokka	Bakta	EggNOG-Mapper	EggNOG-Mapper	EggNOG-Mapper
GCA_000632575.1	PGAP	Bakta	Bakta	Bakta/PGAP/Prokka	Bakta	Bakta/PGAP/Prokka	PGAP	Bakta	Bakta	Prokka	Prokka	Prokka	Bakta	EggNOG-Mapper	EggNOG-Mapper	EggNOG-Mapper
GCA_000632595.2	PGAP	Bakta	Bakta	Bakta/PGAP/Prokka	Bakta	Bakta/PGAP/Prokka	PGAP	Bakta	Bakta	Prokka	Prokka	Prokka	Bakta	EggNOG-Mapper	EggNOG-Mapper	EggNOG-Mapper
GCA_000632615.2	PGAP	Bakta	Bakta	Bakta/PGAP/Prokka	Bakta	Bakta/PGAP/Prokka	PGAP	Bakta	Bakta	Prokka	Prokka	Prokka	Bakta	EggNOG-Mapper	EggNOG-Mapper	EggNOG-Mapper
GCA_000632635.1	PGAP	Bakta	Bakta	Bakta/PGAP/Prokka	Bakta	Bakta/PGAP/Prokka	PGAP	Bakta	Bakta	Prokka	Prokka	Prokka	Bakta	EggNOG-Mapper	EggNOG-Mapper	EggNOG-Mapper
GCA_000632655.1	PGAP	Bakta	Bakta	PGAP	Bakta	Bakta/PGAP/Prokka	PGAP	Bakta	Bakta	Prokka	Prokka	Prokka	Bakta	EggNOG-Mapper	EggNOG-Mapper	EggNOG-Mapper
GCA_000632675.2	PGAP	Bakta	Bakta	Bakta/PGAP/Prokka	Bakta	Bakta/PGAP/Prokka	PGAP	Bakta	Bakta	Prokka	Prokka	Prokka	Bakta	EggNOG-Mapper	EggNOG-Mapper	EggNOG-Mapper
GCA_000633655.1	PGAP	Bakta	Bakta	PGAP	Bakta/PGAP/Prokka	Bakta/PGAP/Prokka	PGAP	Bakta	Bakta	PGAP	Prokka	Prokka	Bakta	EggNOG-Mapper	EggNOG-Mapper	EggNOG-Mapper
GCA_000633675.2	PGAP	Bakta	Bakta	Bakta/PGAP/Prokka	Bakta	Bakta/PGAP/Prokka	PGAP	Bakta	Bakta	PGAP	Prokka	Prokka	Bakta	EggNOG-Mapper	EggNOG-Mapper	EggNOG-Mapper
GCA_000647455.1	PGAP	Bakta	Bakta	Bakta/PGAP/Prokka	Bakta	Bakta/PGAP/Prokka	PGAP	Bakta	Bakta	Prokka	Prokka	Prokka	Bakta	EggNOG-Mapper	EggNOG-Mapper	EggNOG-Mapper
GCA_000647475.1	PGAP	Bakta	Bakta	Bakta/PGAP/Prokka	Bakta	Bakta/PGAP/Prokka	PGAP	Bakta	Bakta	Prokka	Prokka	Prokka	Bakta	EggNOG-Mapper	EggNOG-Mapper	EggNOG-Mapper
GCA_000647495.1	PGAP	Bakta	Bakta	Bakta/PGAP/Prokka	Bakta	Bakta/PGAP/Prokka	PGAP	Bakta	Bakta	Prokka	Prokka	Prokka	Bakta	EggNOG-Mapper	EggNOG-Mapper	EggNOG-Mapper
GCA_000647515.1	PGAP	Bakta	Bakta	Bakta/PGAP/Prokka	Bakta	Bakta/PGAP/Prokka	PGAP	Bakta	Bakta	Prokka	Prokka	Prokka	Bakta	EggNOG-Mapper	EggNOG-Mapper	EggNOG-Mapper
GCA_000647795.2	PGAP	Bakta	Bakta	Bakta/PGAP/Prokka	Bakta/PGAP/Prokka	Bakta/PGAP/Prokka	PGAP	Bakta	Bakta	Prokka	Prokka	Prokka	Bakta	EggNOG-Mapper	EggNOG-Mapper	EggNOG-Mapper
GCA_000647815.3	PGAP	Bakta	Bakta	Bakta/PGAP/Prokka	Bakta/PGAP/Prokka	Bakta/PGAP/Prokka	PGAP	Bakta	Bakta	Prokka	Prokka	Prokka	Bakta	EggNOG-Mapper	EggNOG-Mapper	EggNOG-Mapper
GCA_000662395.1	PGAP	Bakta	Bakta	Bakta/PGAP/Prokka	Bakta	Bakta/PGAP/Prokka	PGAP	Bakta	Bakta	Prokka	Prokka	Prokka	Bakta	EggNOG-Mapper	EggNOG-Mapper	EggNOG-Mapper
GCA_000671295.1	PGAP	Bakta	Bakta	Bakta/PGAP/Prokka	Bakta	Bakta/PGAP/Prokka	PGAP	Bakta	Bakta	PGAP	Prokka	Prokka	Bakta	EggNOG-Mapper	EggNOG-Mapper	EggNOG-Mapper
GCA_000681435.1	PGAP	Bakta	Bakta	PGAP	Bakta	Bakta/PGAP/Prokka	PGAP	Bakta	Bakta	Prokka	Prokka	Prokka	EggNOG-Mapper	EggNOG-Mapper	EggNOG-Mapper	EggNOG-Mapper
GCA_000687005.1	PGAP	Bakta	Bakta	PGAP	Bakta	Bakta/PGAP/Prokka	PGAP	Bakta	Bakta	Prokka	Prokka	Prokka	Bakta	EggNOG-Mapper	EggNOG-Mapper	EggNOG-Mapper
GCA_000687025.1	PGAP	Bakta	Bakta	PGAP	Bakta	Bakta/PGAP/Prokka	PGAP	Bakta	Bakta	Prokka	Prokka	Prokka	Bakta	EggNOG-Mapper	EggNOG-Mapper	EggNOG-Mapper
GCA_000687045.1	PGAP	Bakta	Bakta	PGAP	Bakta	Bakta/PGAP/Prokka	PGAP	Bakta	Bakta	Prokka	Prokka	Prokka	Bakta	EggNOG-Mapper	EggNOG-Mapper	EggNOG-Mapper
GCA_000687065.1	PGAP	Bakta	Bakta	PGAP	Bakta	Bakta/PGAP/Prokka	PGAP	Bakta	Bakta	Prokka	Prokka	Prokka	Bakta	EggNOG-Mapper	EggNOG-Mapper	EggNOG-Mapper
GCA_000687085.1	PGAP	Bakta	Bakta	PGAP	Bakta	Bakta/PGAP/Prokka	PGAP	Bakta	Bakta	PGAP	Prokka	Prokka	Bakta	EggNOG-Mapper	EggNOG-Mapper	EggNOG-Mapper
GCA_000687105.1	PGAP	Bakta	Bakta	PGAP	Bakta	Bakta/PGAP/Prokka	PGAP	Bakta	Bakta	Prokka	Prokka	Prokka	Bakta	EggNOG-Mapper	EggNOG-Mapper	EggNOG-Mapper
GCA_000687125.1	PGAP	Bakta	Bakta	PGAP	Bakta	Bakta/PGAP/Prokka	PGAP	Bakta	Bakta	Prokka	Prokka	Prokka	Bakta	EggNOG-Mapper	EggNOG-Mapper	EggNOG-Mapper
GCA_000689315.1	PGAP	Bakta	Bakta	PGAP	Bakta	Bakta/PGAP/Prokka	PGAP	PGAP	Bakta	Prokka	Prokka	Prokka	EggNOG-Mapper	EggNOG-Mapper	EggNOG-Mapper	EggNOG-Mapper
GCA_000690815.1	PGAP	Bakta	Bakta	Bakta/PGAP/Prokka	Bakta/PGAP/Prokka	Bakta/PGAP/Prokka	PGAP	Bakta	Bakta	PGAP	Prokka	Prokka	Bakta	EggNOG-Mapper	EggNOG-Mapper	EggNOG-Mapper
GCA_000690945.1	PGAP	Bakta	Bakta	PGAP	Bakta	Bakta/PGAP/Prokka	PGAP	Bakta	Bakta	Prokka	Prokka	Prokka	Bakta	EggNOG-Mapper	EggNOG-Mapper	EggNOG-Mapper
GCA_000690965.1	PGAP	Bakta	Bakta	PGAP	Bakta	Bakta/PGAP/Prokka	PGAP	Bakta	Bakta	Prokka	Prokka	Prokka	Bakta	EggNOG-Mapper	EggNOG-Mapper	EggNOG-Mapper
GCA_000690985.1	PGAP	Bakta	Bakta	PGAP	Bakta	Bakta/PGAP/Prokka	PGAP	Bakta	Bakta	Prokka	Prokka	Prokka	Bakta	EggNOG-Mapper	EggNOG-Mapper	EggNOG-Mapper
GCA_000691005.1	PGAP	Bakta	Bakta	PGAP	Bakta	Bakta/PGAP/Prokka	PGAP	Bakta	Bakta	Prokka	Prokka	Prokka	Bakta	EggNOG-Mapper	EggNOG-Mapper	EggNOG-Mapper
GCA_000691025.1	PGAP	Bakta	Bakta	PGAP	Bakta	Bakta/PGAP/Prokka	PGAP	Bakta	Bakta	Prokka	Prokka	Prokka	Bakta	EggNOG-Mapper	EggNOG-Mapper	EggNOG-Mapper
GCA_000691045.1	PGAP	Bakta	Bakta	PGAP	Bakta	Bakta/PGAP/Prokka	PGAP	Bakta	Bakta	Prokka	Prokka	Prokka	Bakta	EggNOG-Mapper	EggNOG-Mapper	EggNOG-Mapper
GCA_000691065.1	PGAP	Bakta	Bakta	PGAP	Bakta	Bakta/PGAP/Prokka	PGAP	Bakta	Bakta	Prokka	Prokka	Prokka	Bakta	EggNOG-Mapper	EggNOG-Mapper	EggNOG-Mapper
GCA_000691085.1	PGAP	Bakta	Bakta	PGAP	Bakta	Bakta/PGAP/Prokka	PGAP	Bakta	Bakta	Prokka	Prokka	Prokka	Bakta	EggNOG-Mapper	EggNOG-Mapper	EggNOG-Mapper
GCA_000691105.1	PGAP	Bakta	Bakta	PGAP	Bakta	Bakta/PGAP/Prokka	PGAP	Bakta	Bakta	Prokka	Prokka	Prokka	Bakta	EggNOG-Mapper	EggNOG-Mapper	EggNOG-Mapper
GCA_000692375.1	PGAP	Bakta	Bakta	Bakta/Prokka	Bakta	Bakta/PGAP/Prokka	PGAP	Bakta	Bakta	PGAP	Prokka	Prokka	Bakta	EggNOG-Mapper	EggNOG-Mapper	EggNOG-Mapper
GCA_000692395.1	Bakta	Bakta	Bakta	Prokka	Bakta	Bakta/PGAP/Prokka	PGAP	Bakta	Bakta	EggNOG-Mapper	Prokka	Prokka	Bakta	EggNOG-Mapper	EggNOG-Mapper	EggNOG-Mapper
GCA_000692415.1	PGAP	Bakta	Bakta	Prokka	Bakta	Bakta/PGAP/Prokka	PGAP	Bakta	Bakta	PGAP	Prokka	Prokka	Bakta	EggNOG-Mapper	EggNOG-Mapper	EggNOG-Mapper
GCA_000692435.1	PGAP	Bakta	Bakta	PGAP	Bakta	Bakta/PGAP/Prokka	PGAP	Bakta	Bakta	EggNOG-Mapper	Prokka	Prokka	Bakta	EggNOG-Mapper	EggNOG-Mapper	EggNOG-Mapper
GCA_000692455.1	PGAP	Bakta	Bakta	Prokka	Bakta	Bakta/PGAP/Prokka	PGAP	Bakta	Bakta	PGAP	Prokka	Prokka	Bakta	EggNOG-Mapper	EggNOG-Mapper	EggNOG-Mapper
GCA_000692475.1	PGAP	Bakta	Bakta	Bakta/Prokka	Bakta/PGAP/Prokka	Bakta/PGAP/Prokka	PGAP	Bakta	Bakta	EggNOG-Mapper	Prokka	Prokka	Bakta	EggNOG-Mapper	EggNOG-Mapper	EggNOG-Mapper
GCA_000692495.1	PGAP	Bakta	Bakta	Prokka	Bakta	Bakta/PGAP/Prokka	PGAP	Bakta	Bakta	EggNOG-Mapper	Prokka	Prokka	Bakta	EggNOG-Mapper	EggNOG-Mapper	EggNOG-Mapper
[truncated: 22,401 more rows]

## Sheet: Best performing tool Archaea
NCBI Accession	GTDB Phylum	GTDB Class	GTDB Order	GTDB Family	GTDB Genus	GTDB Species	NCBI Phylum	NCBI Class	NCBI Order	NCBI Family	NCBI Genus	NCBI Species	Highest Gene Count	Lowest Undescribed Genes Count	Lowest Undescribed Genes [%]	Highest rRNA Count	Highest tRNA Count	Highest tmRNA Count	Highest Total Annotated Coding Space	Highest Described Annotated Coding Space	Lowest Undescribed Coding Space	Highest All Feature Lenght	Highest Described Feature Lenght	Highest Undescribed Feature Lenght	Highest GO coverage	Highest GO coverage [%]	Highest GO coverage in Described Features [%]	Highest Median GO Richness
[truncated: 2,791 more rows]

[truncated: 4 more sheets: Best performing tool Bacteria n, Best performing tool MAGs, tmRNA in Archaea, Serotyping Escherichia coli]
