# Supplementary material for: Large-scale Evaluation of Prokaryotic Annotation Tools Across Thousands of Species
Source: Research Square preprint supplement (doi:10.21203/rs.3.rs-7317585/v1), 2025-08-13
Supplement: Supplementary file 1 [file d9a4fe72a18ebf0af03dabb8.pdf]

# Supplement

## Contents

|          |                                                                                 |           |
|----------|---------------------------------------------------------------------------------|-----------|
| <b>1</b> | <b>Dataset selection process for Bacteria, Archaea, <i>E. coli</i> and MAGs</b> | <b>3</b>  |
| <b>2</b> | <b>Dataset composition</b>                                                      | <b>4</b>  |
| <b>3</b> | <b>Baseline annotation (<i>E. coli</i>)</b>                                     | <b>6</b>  |
| 3.1      | Data description for <i>E. coli</i> strains . . . . .                           | 6         |
| 3.2      | Total feature count . . . . .                                                   | 7         |
| 3.3      | Undescribed feature count . . . . .                                             | 7         |
| 3.4      | Total feature length . . . . .                                                  | 7         |
| 3.5      | Undescribed feature length . . . . .                                            | 8         |
| 3.6      | Total annotated coding space . . . . .                                          | 8         |
| 3.7      | Described annotated coding space . . . . .                                      | 8         |
| 3.8      | Undescribed annotated coding space . . . . .                                    | 9         |
| 3.9      | Differences in annotating assembly gaps between tools. . . . .                  | 10        |
| 3.10     | Impact on rRNA and tRNA discoverability in <i>E. coli</i> . . . . .             | 11        |
| <b>4</b> | <b>Bacteria kingdom</b>                                                         | <b>12</b> |
| 4.1      | Data description . . . . .                                                      | 12        |
| 4.2      | Taxonomy . . . . .                                                              | 13        |
| 4.2.1    | Total coding length . . . . .                                                   | 13        |
| 4.2.2    | Feature length comparison by phyla . . . . .                                    | 14        |
| 4.3      | Analysis of rRNA prediction variance . . . . .                                  | 15        |
| 4.3.1    | Capability of PGAP to annotate rRNA features across high contig genomes . . . . | 18        |
| <b>5</b> | <b>Archaea</b>                                                                  | <b>19</b> |
| 5.1      | Data description . . . . .                                                      | 19        |
| 5.2      | RNA comparison for Archaea subgroup . . . . .                                   | 20        |
| 5.3      | Feature length comparison by phyla . . . . .                                    | 21        |
| <b>6</b> | <b>Metagenome-assembled genomes (MAGs)</b>                                      | <b>22</b> |
| 6.1      | Data description . . . . .                                                      | 22        |
| 6.2      | Coding length comparison . . . . .                                              | 22        |
| <b>7</b> | <b>Frameshifted genomes</b>                                                     | <b>24</b> |
| 7.1      | Genome region comparison . . . . .                                              | 24        |
| <b>8</b> | <b>Temporal analysis</b>                                                        | <b>25</b> |
| 8.1      | Database increase of unique species across years . . . . .                      | 26        |
| <b>9</b> | <b>Annotation performance over time</b>                                         | <b>27</b> |

|                           |    |
|---------------------------|----|
| 10 Workflow visualization | 28 |
| 11 Decision tree          | 29 |

# 1 Dataset selection process for Bacteria, Archaea, *E. coli* and MAGs

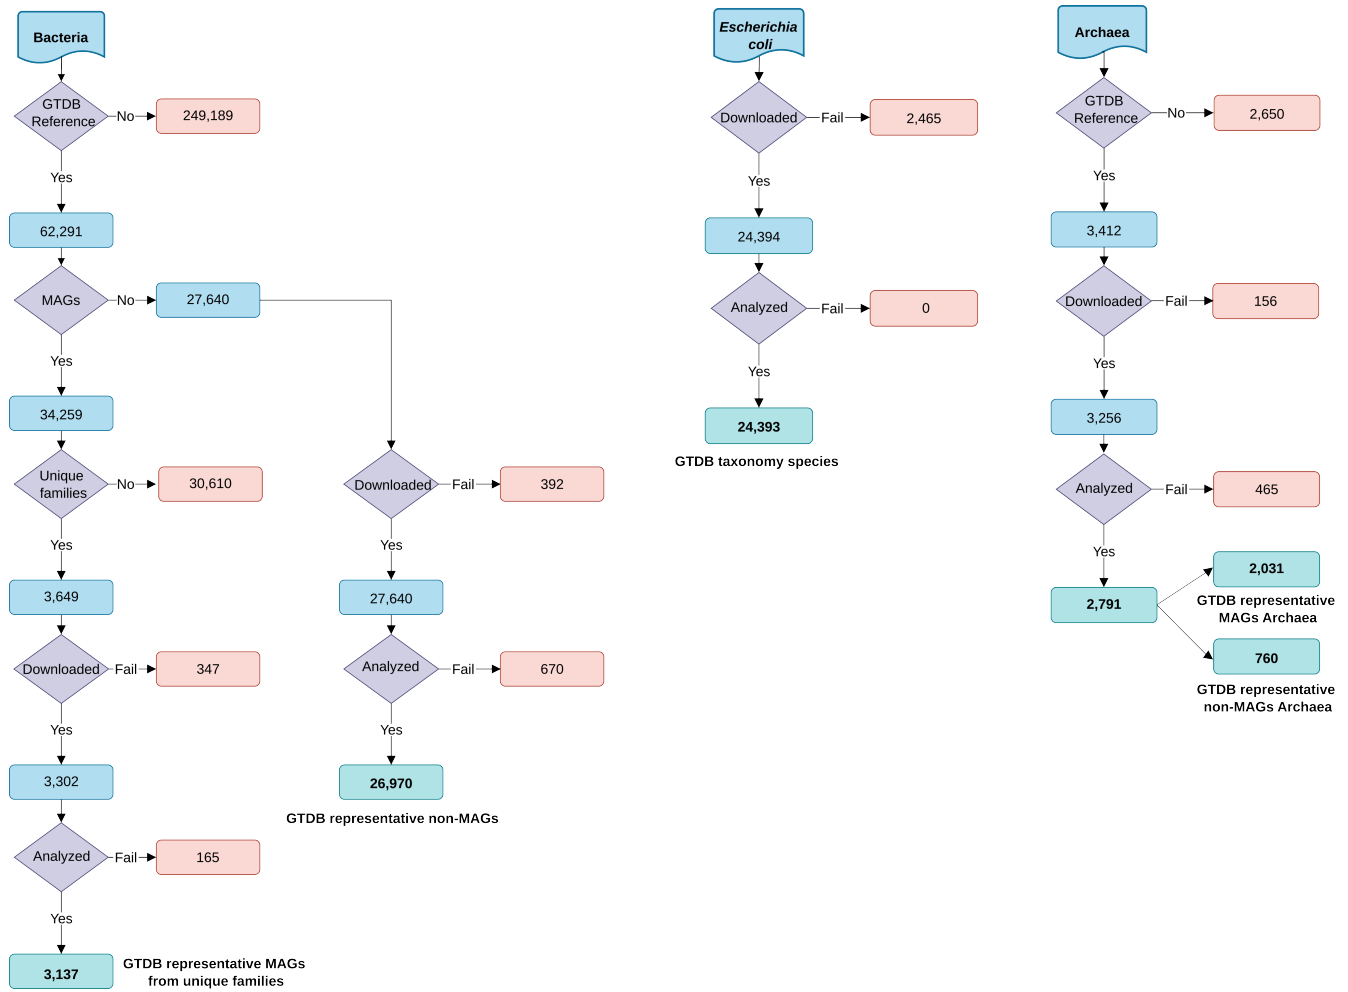

Figure 1: Flowchart of the sample requirement to the analysis. The blue boxes at the top represent the groups being investigated in the analysis. Purple rhombuses indicate decision points where samples may be excluded from the analysis. Green boxes show the number of samples that pass each decision point, while red boxes show the number of samples that are rejected or fail at each stage.

## 2 Dataset composition

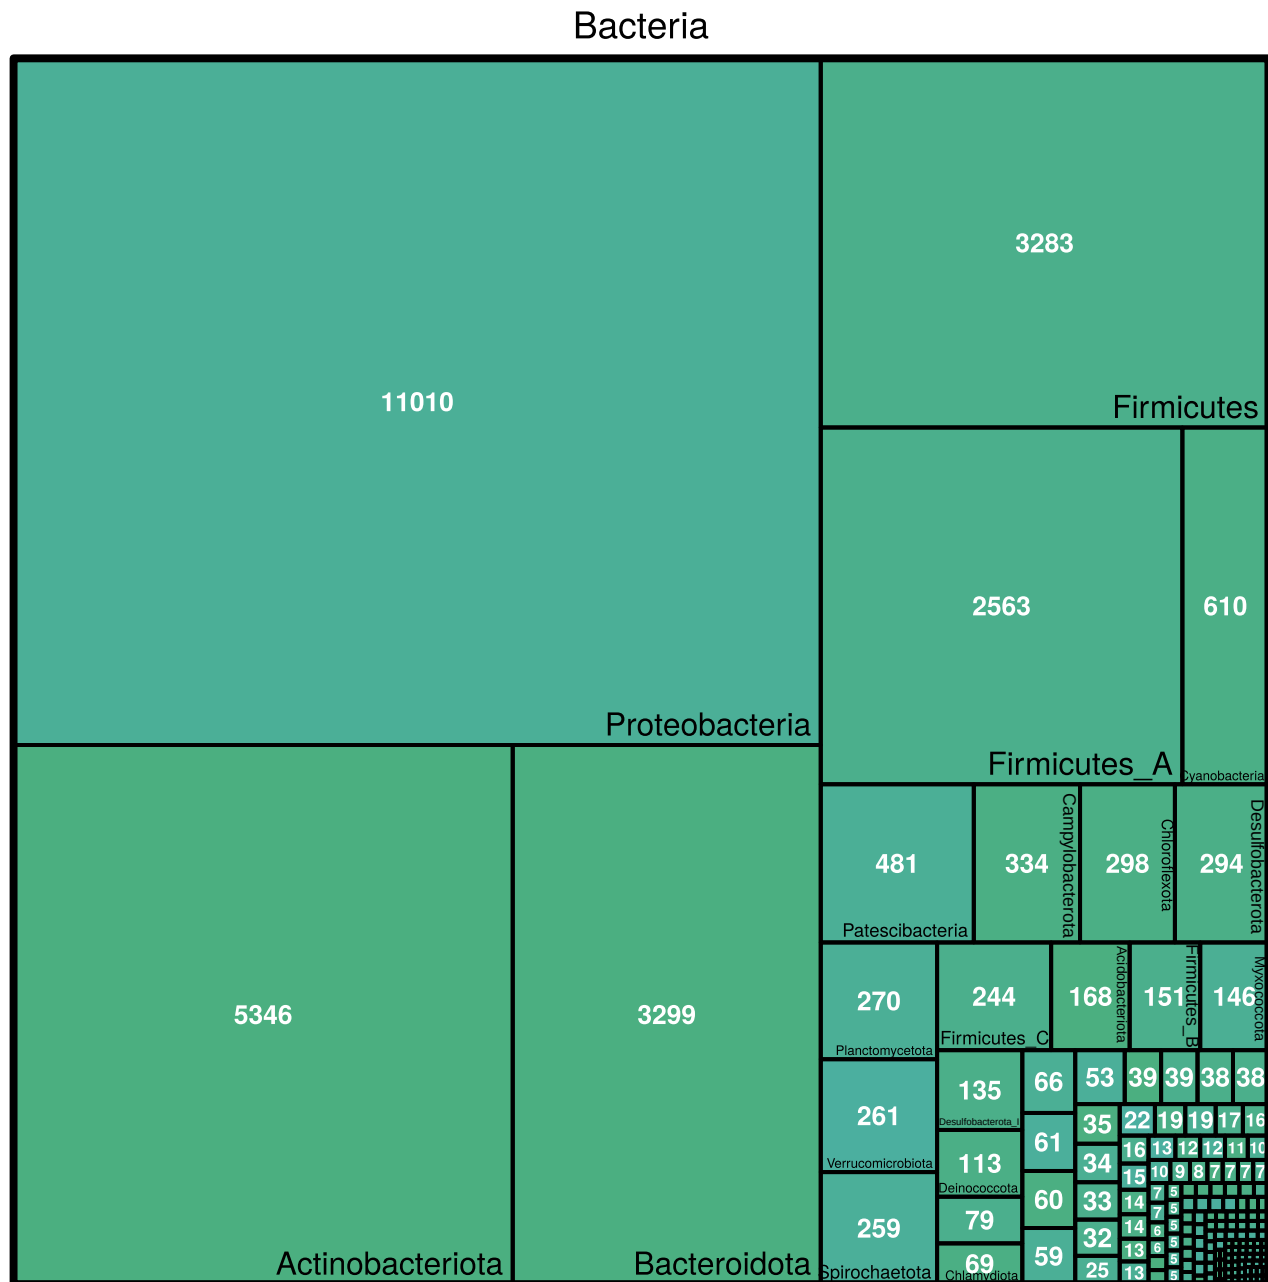

Figure 2: The Composition of the Bacteria kingdom group, divided by their phyla. *E. coli* baseline annotation group is excluded from visualization. Phyla nomenclature based on GTDB database version 107. Only pylas wit more than 100 representatives are labeled.



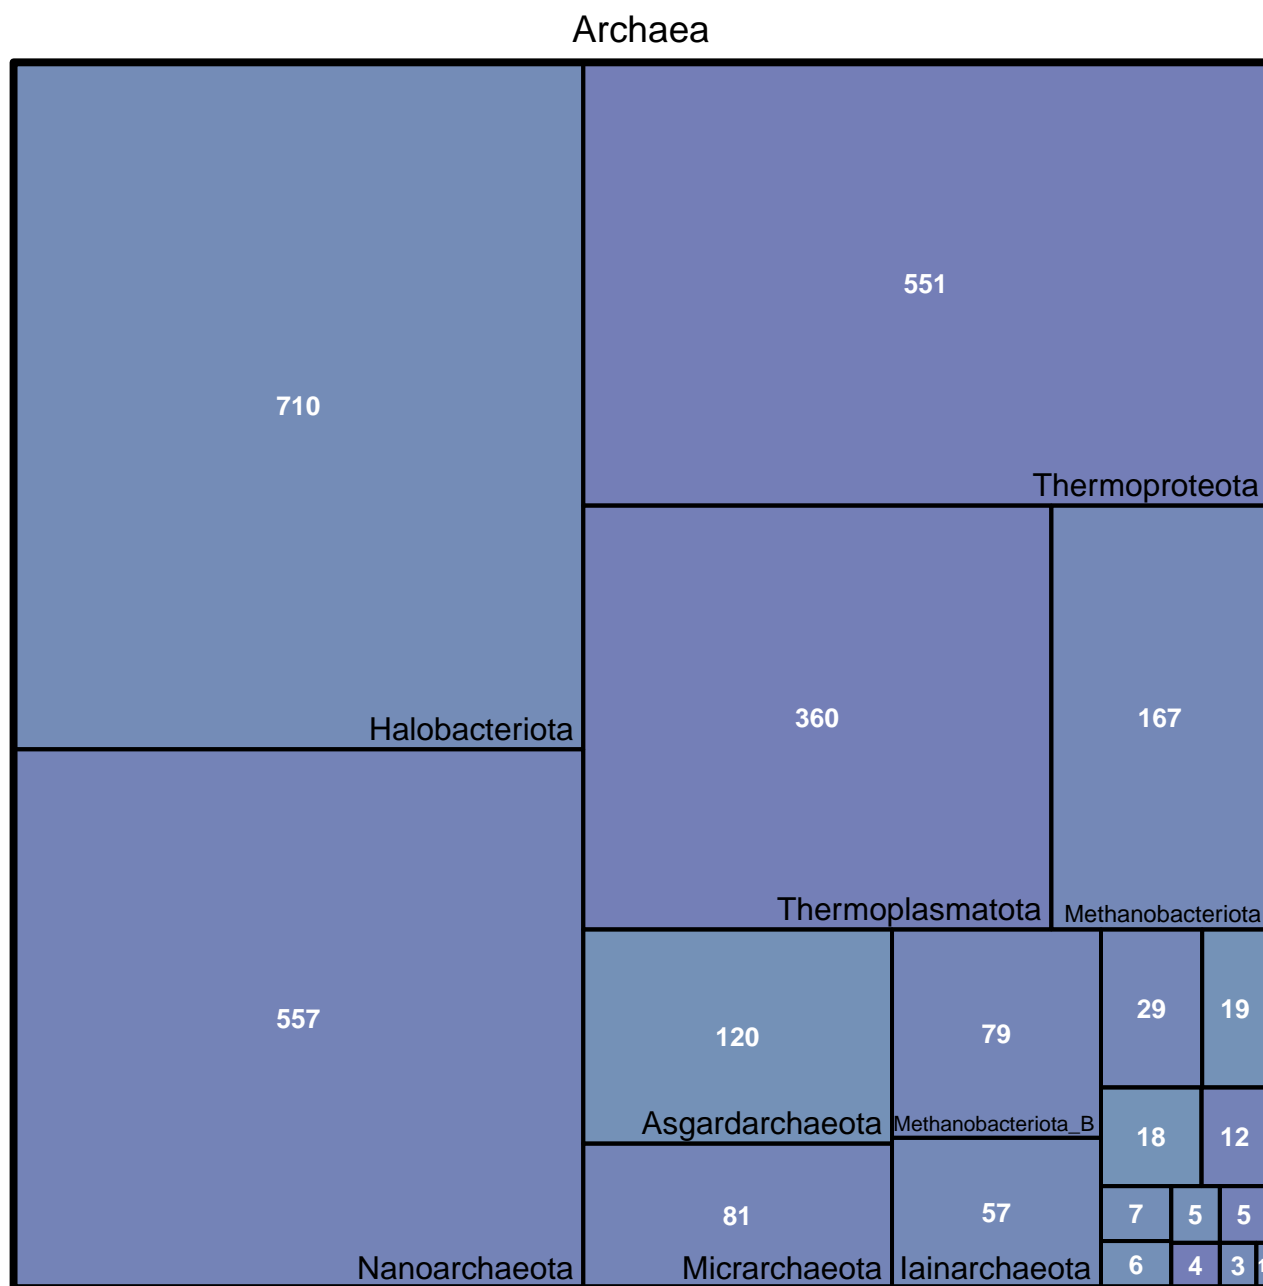

Figure 3: The Composition of the Archaea kingdom group, divided by their phyla. Phyla nomenclature based on GTDB database version 107. Only pylas wit more than 50 representatives are labeled.

### 3 Baseline annotation (*E. coli*)

#### 3.1 Data description for *E. coli* strains

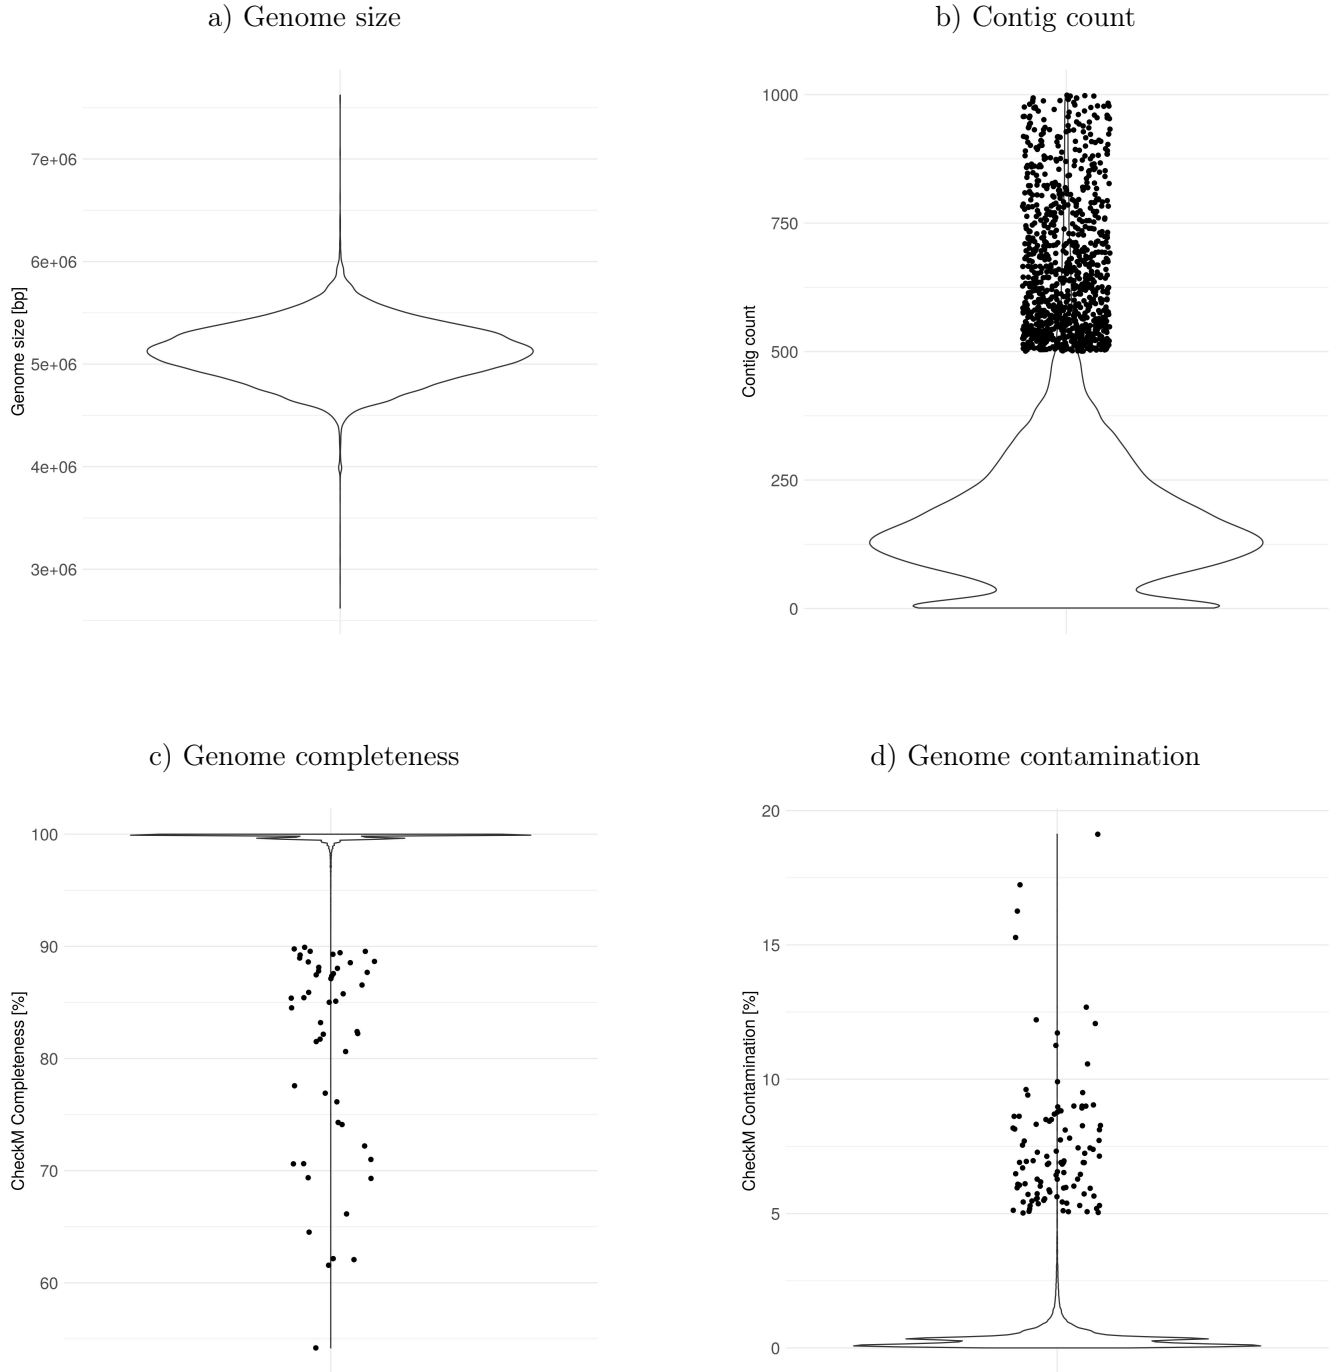

Figure 4: Basic metrics characterizing the *Escherichia coli* subgroup within the analyzed samples. Each panel presents a distinct attribute reported in GTDB dataset: (A) Genome size derived from genome\_size variable, (B) Contig count derived from contig\_count variable, (C) Genome completeness derived from GTDB checkm\_completeness variable, and (D) Genome contamination derived from GTDB checkm\_contamination variable.

### 3.2 Total feature count

Table 1: Comparative results of total feature count and one-way ANOVA Tukey HSD post hoc test. The differences on example of Prokka vs Bakta means that on average Prokka found 349.60890 less features than Bakta.

| Comparison              | Mean difference [N] | Lower end point of CI 95% | Upper end point of CI 95% | adj P-value |
|-------------------------|---------------------|---------------------------|---------------------------|-------------|
| Prokka vs Bakta         | -349.60890          | -358.58465                | -340.63316                | < 0.001     |
| Prokka vs EggNOG-mapper | -21.41684           | -30.39259                 | -12.44109                 | < 0.001     |
| Prokka vs PGAP          | -561.75821          | -570.73396                | -552.78246                | < 0.001     |
| EggNOG-mapper vs Bakta  | -328.19206          | -337.16781                | -319.21632                | < 0.001     |
| PGAP vs Bakta           | 212.14931           | 203.17356                 | 221.12505                 | < 0.001     |
| PGAP vs EggNOG-mapper   | 540.34137           | 531.36562                 | 549.31712                 | < 0.001     |

### 3.3 Undescribed feature count

Table 2: Comparative results of undescribed feature count and one-way ANOVA Tukey HSD post hoc test. The differences on example of Prokka vs Bakta means that on average Prokka had 1366.9815 more undescribed features than Bakta.

| Comparison              | Mean difference [N] | Lower end point of CI 95% | Upper end point of CI 95% | adj P-value |
|-------------------------|---------------------|---------------------------|---------------------------|-------------|
| Prokka vs Bakta         | 1366.9815           | 1362.7445                 | 1371.2185                 | < 0.001     |
| Prokka vs EggNOG-mapper | 971.2406            | 967.0036                  | 975.4776                  | < 0.001     |
| Prokka vs PGAP          | 663.2449            | 659.0079                  | 667.4820                  | < 0.001     |
| EggNOG-mapper vs Bakta  | 395.7409            | 391.5039                  | 399.9779                  | < 0.001     |
| PGAP vs Bakta           | 703.7365            | 699.4995                  | 707.9735                  | < 0.001     |
| PGAP vs EggNOG-mapper   | 307.9956            | 303.7586                  | 312.2326                  | < 0.001     |

### 3.4 Total feature length

Table 3: Comparative results of total features length and one-way ANOVA Tukey HSD post hoc test. The differences on example of Prokka vs Bakta means that on average Prokka had 4.5229879 aa longer features than Bakta.

| Comparison              | Mean difference [aa] | Lower end point of CI 95% | Upper end point of CI 95% | adj P-value |
|-------------------------|----------------------|---------------------------|---------------------------|-------------|
| Prokka vs Bakta         | 4.5229879            | 4.2980074                 | 4.7479685                 | < 0.001     |
| Prokka vs EggNOG-mapper | 3.0849649            | 2.8599844                 | 3.3099455                 | < 0.001     |
| Prokka vs PGAP          | 3.9391125            | 3.7141320                 | 4.1640931                 | < 0.001     |
| EggNOG-mapper vs Bakta  | 1.4380230            | 1.2130425                 | 1.6630036                 | < 0.001     |
| PGAP vs Bakta           | 0.5838754            | 0.3588949                 | 0.8088560                 | < 0.001     |
| PGAP vs EggNOG-mapper   | -0.8541476           | -1.0791282                | -0.6291671                | < 0.001     |

### 3.5 Undescribed feature length

Table 4: Comparative results of undescribed features length and one-way ANOVA Tukey HSD post hoc test. The differences on example of Prokka vs Bakta means that on average Prokka had 128.774889 aa longer features than Bakta.

| Comparison              | Mean difference [aa] | Lower end point of CI 95% | Upper end point of CI 95% | adj P-value |
|-------------------------|----------------------|---------------------------|---------------------------|-------------|
| Prokka vs Bakta         | 128.774889           | 127.7020696               | 129.8477080               | < 0.001     |
| EggNOG-mapper vs Bakta  | 128.622926           | 127.5501071               | 129.6957460               | < 0.001     |
| PGAP vs Bakta           | 14.235710            | 13.1628907                | 15.3085290                | < 0.001     |
| PGAP vs EggNOG-mapper   | -114.387216          | -115.4600358              | -113.3143970              | < 0.001     |
| Prokka vs EggNOG-mapper | 0.151963             | -0.9208569                | 1.2247820                 | 0.9835263   |
| Prokka vs PGAP          | 114.539179           | 113.4663595               | 115.6119980               | < 0.001     |

### 3.6 Total annotated coding space

Table 5: Comparative results of total annotated coding space and one-way ANOVA Tukey HSD post hoc test of proportion. The differences on example of Prokka vs Bakta means that on average Prokka had 39820.011 bp smaller total coding space.

| Comparison              | Mean difference [bp] | Lower end point of CI 95% | Upper end point of CI 95% | adj P-value |
|-------------------------|----------------------|---------------------------|---------------------------|-------------|
| Prokka vs Bakta         | -39820.011           | -45611.436                | -34028.585                | < 0.001     |
| Prokka vs EggNOG-mapper | -41402.180           | -47193.606                | -35610.754                | < 0.001     |
| Prokka vs PGAP          | -251480.428          | -257271.854               | -245689.002               | < 0.001     |
| EggNOG-mapper vs Bakta  | 1582.169             | -4209.256                 | 7373.595                  | 0.896       |
| PGAP vs Bakta           | 211660.417           | 205868.992                | 217451.843                | < 0.001     |
| PGAP vs EggNOG-mapper   | 210078.248           | 204286.822                | 215869.674                | < 0.001     |

### 3.7 Described annotated coding space

Table 6: Comparative results of described coding space and one-way ANOVA Tukey HSD post hoc test. The differences on example of Prokka vs Bakta means that on average Prokka had 870500.33 bp smaller described coding space.

| Comparison              | Mean difference [bp] | Lower end point of CI 95% | Upper end point of CI 95% | adj P-value |
|-------------------------|----------------------|---------------------------|---------------------------|-------------|
| Prokka vs Bakta         | -870500.33           | -874927.12                | -866073.54                | < 0.001     |
| Prokka vs EggNOG-mapper | -733250.20           | -737676.99                | -728823.41                | < 0.001     |
| Prokka vs PGAP          | -816710.67           | -821137.46                | -812283.88                | < 0.001     |
| EggNOG-mapper vs Bakta  | -137250.13           | -141676.91                | -132823.34                | < 0.001     |
| PGAP vs Bakta           | -53789.66            | -58216.44                 | -49362.87                 | < 0.001     |
| PGAP vs EggNOG-mapper   | 83460.47             | 79033.68                  | 87887.26                  | < 0.001     |

### 3.8 Undescribed annotated coding space

Table 7: Comparative results of undescribed coding space and one-way ANOVA Tukey HSD post hoc test for undescribed coding space. The differences on example of Prokka vs Bakta means that on average Prokka had 829665.56 bp larger undescribed coding space.

| Comparison              | Mean difference | Lower end point of CI 95% | Upper end point of CI 95% | adj P-value |
|-------------------------|-----------------|---------------------------|---------------------------|-------------|
| Prokka vs Bakta         | 829665.56       | 827720.19                 | 831610.93                 | < 0.001     |
| Prokka vs EggNOG-mapper | 690833.26       | 688887.89                 | 692778.63                 | < 0.001     |
| Prokka vs PGAP          | 731815.84       | 729870.48                 | 733761.21                 | < 0.001     |
| EggNOG-mapper vs Bakta  | 138832.30       | 136886.93                 | 140777.67                 | < 0.001     |
| PGAP vs Bakta           | 97849.72        | 95904.35                  | 99795.08                  | < 0.001     |
| PGAP vs EggNOG-mapper   | -40982.58       | -42927.95                 | -39037.21                 | < 0.001     |

### 3.9 Differences in annotating assembly gaps between tools.

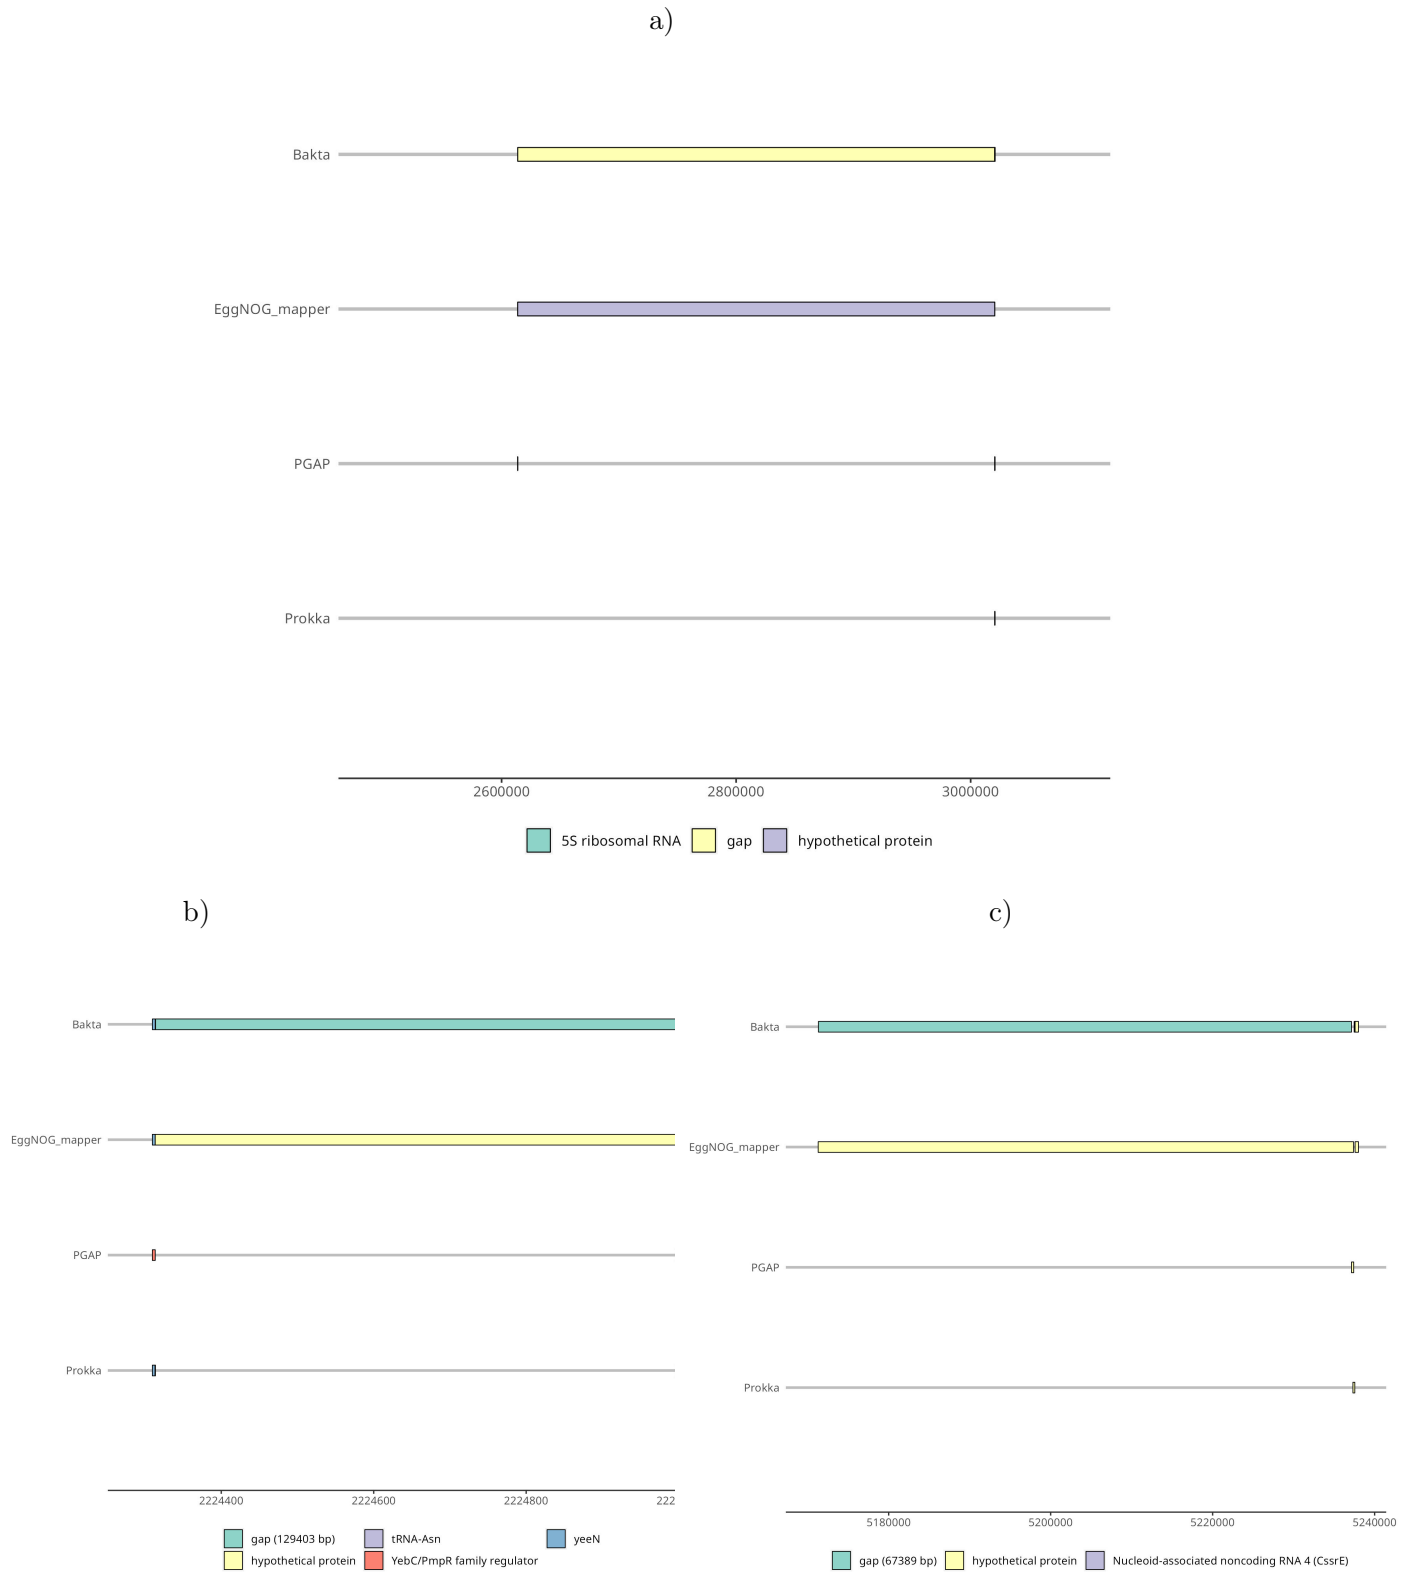

Figure 5: Examples of unusually long hypothetical proteins identified within EggNOG-mapper on the examples found in GCA\_014216915.1. Specific genomic regions with found anomalies are: (a) 2490000 to 3090000 bp, (b) 2224285 to 2355669 bp, (c) 5170000 to 5239000 bp.

### 3.10 Impact on rRNA and tRNA discoverability in *E. coli*

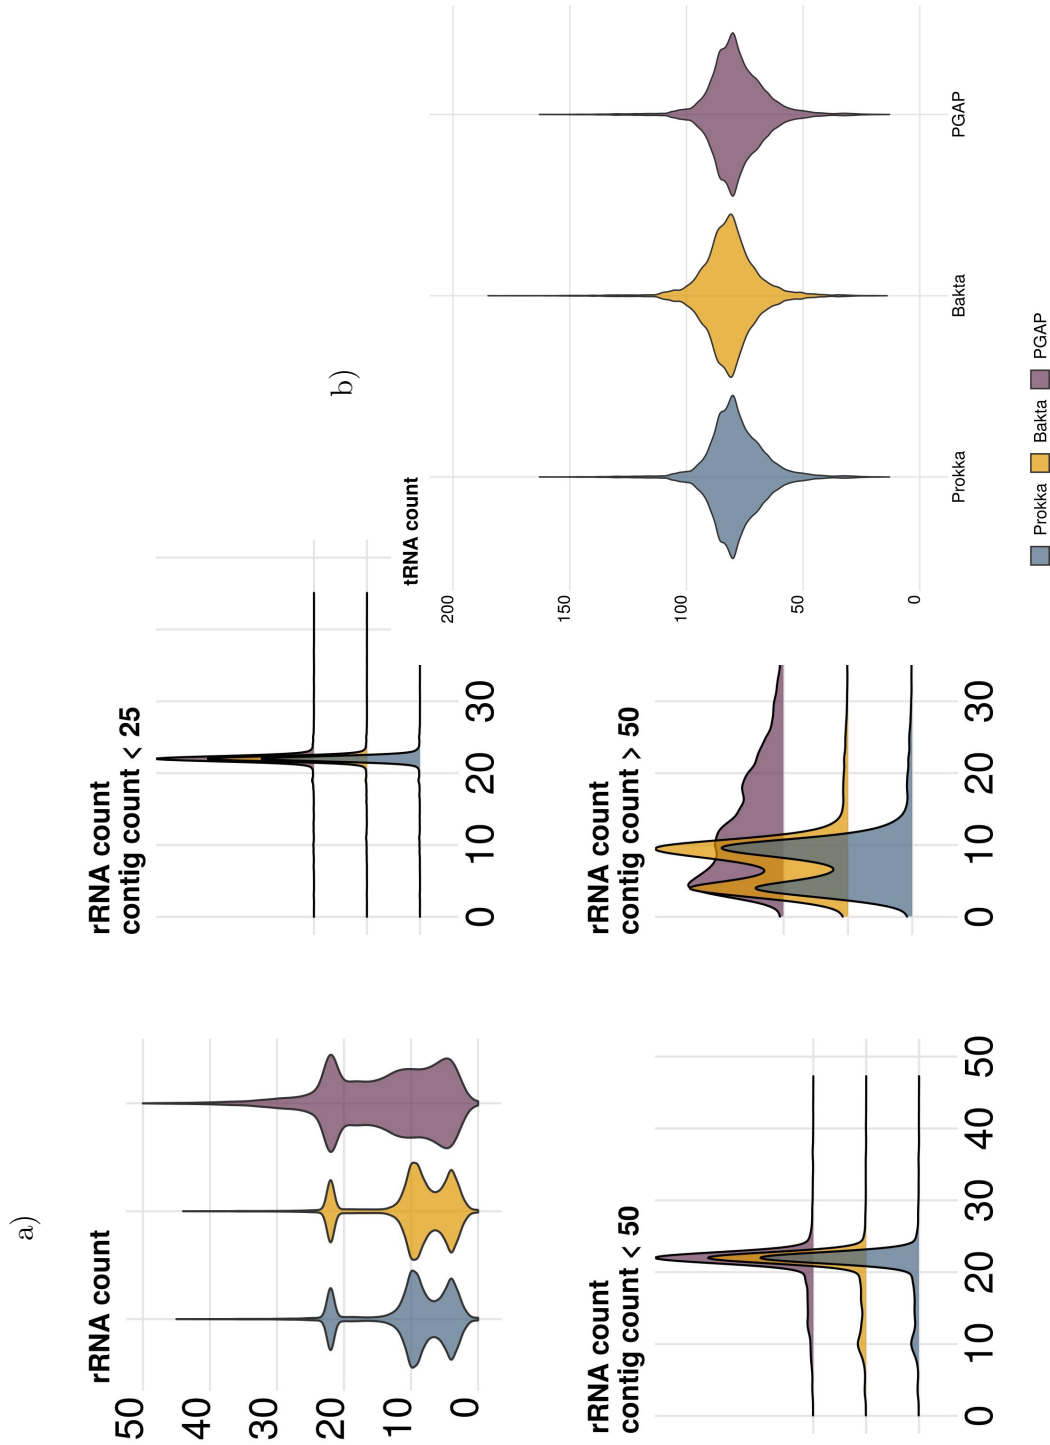

Figure 6: Analysis of contig counts and their impact on rRNA/tRNA discoverability in *Escherichia coli*. a) rRNA identification across contig count bins, with a ridge plot showing rRNA distribution in three groups: <25, <50, and >50 contigs. b) tRNA count distribution.

## 4 Bacteria kingdom

### 4.1 Data description

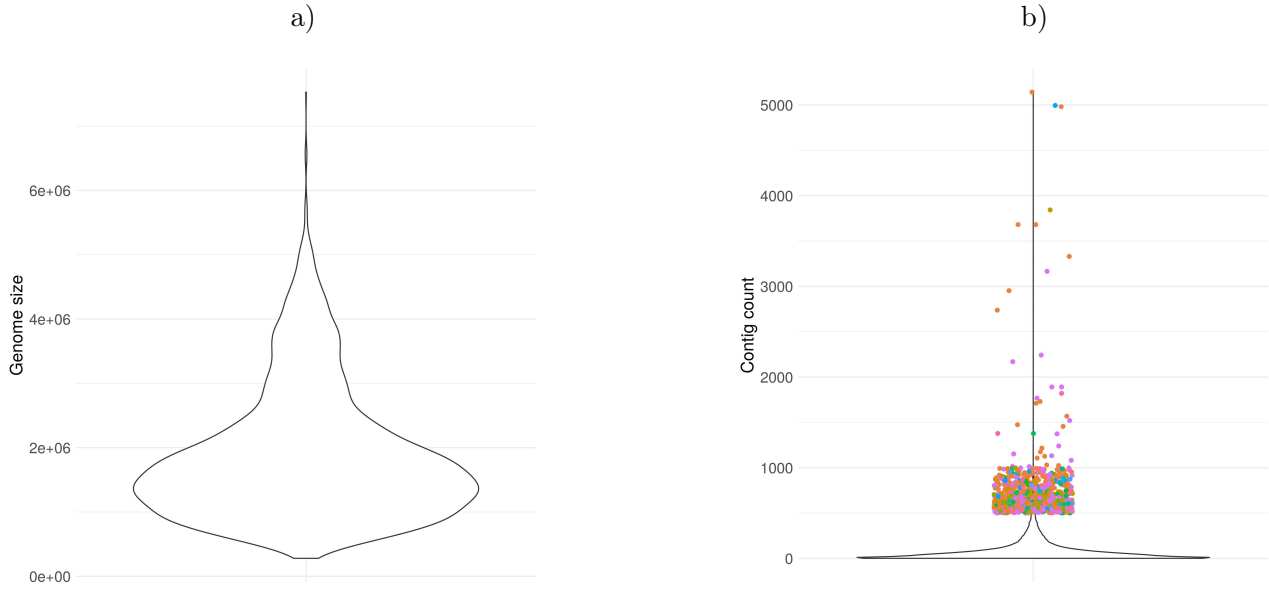

Figure 7: Basic metrics characterizing the Bacteria kingdom group within the analyzed samples. Each panel presents a distinct attribute: (A) Genome size derived from `genome_size` variable, (B) Contig count derived from `contig_count` variable. Major outliers in the respective categorise are shown as a dots, colour coded by their phyla obtained from `gtdb_taxonomy` variable.

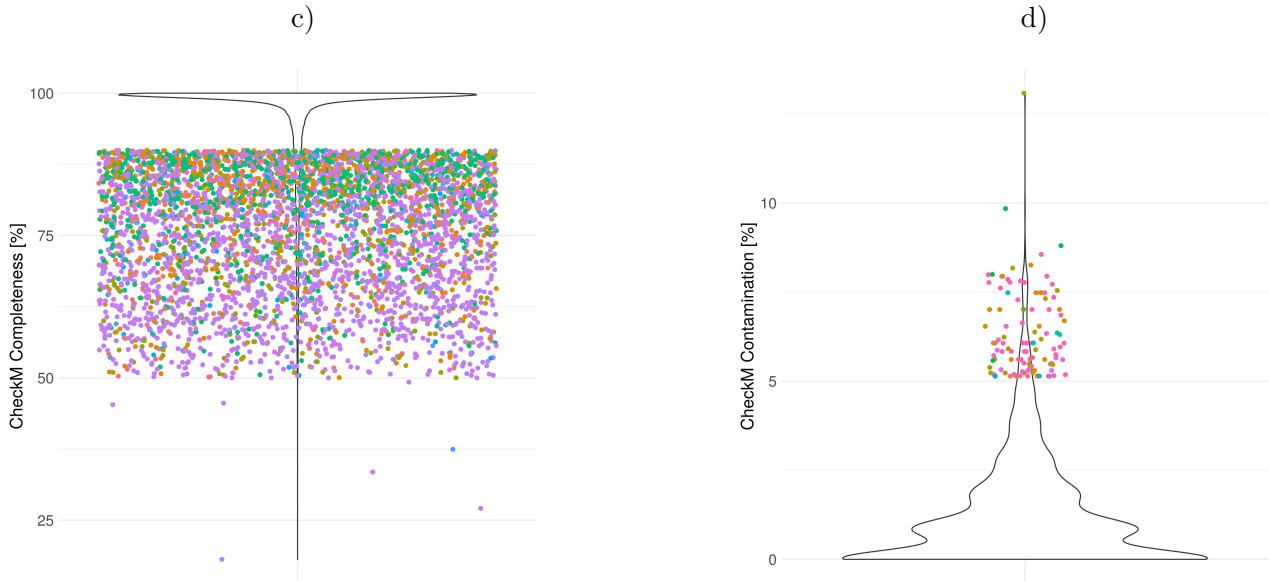

Figure 8: Basic metrics characterizing the Bacteria kingdom group within the analyzed samples. Each panel presents a distinct: (C) Genome completeness derived from GTDB `checkm_completeness` variable, and (D) Genome contamination derived from GTDB `checkm_contamination` variable. Major outliers in the respective categorise are shown as a dots, colour coded by their phyla obtained from `gtdb_taxonomy` variable.



## 4.2 Taxonomy

### 4.2.1 Total coding length

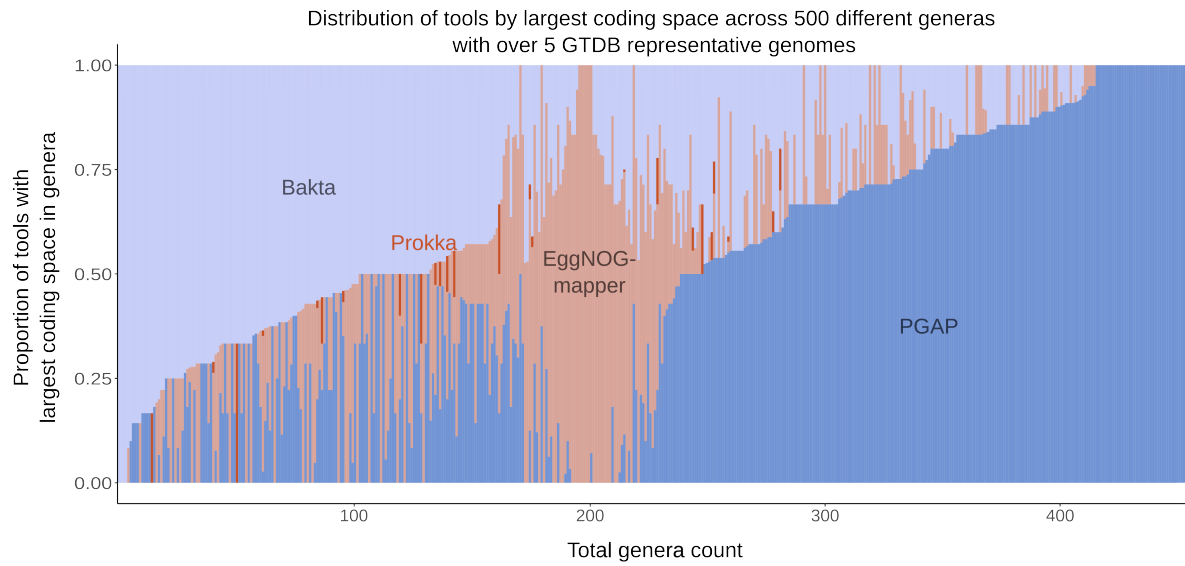

Figure 9: Competitive tool performance for the largest total coding space per species grouped by genus. The barcharts highlights the number of times a tool has achieved the best performance in maximizing total coding space. The difference in performance between the best and second-best tools was not considered by this approach.

## 4.2.2 Feature length comparison by phyla

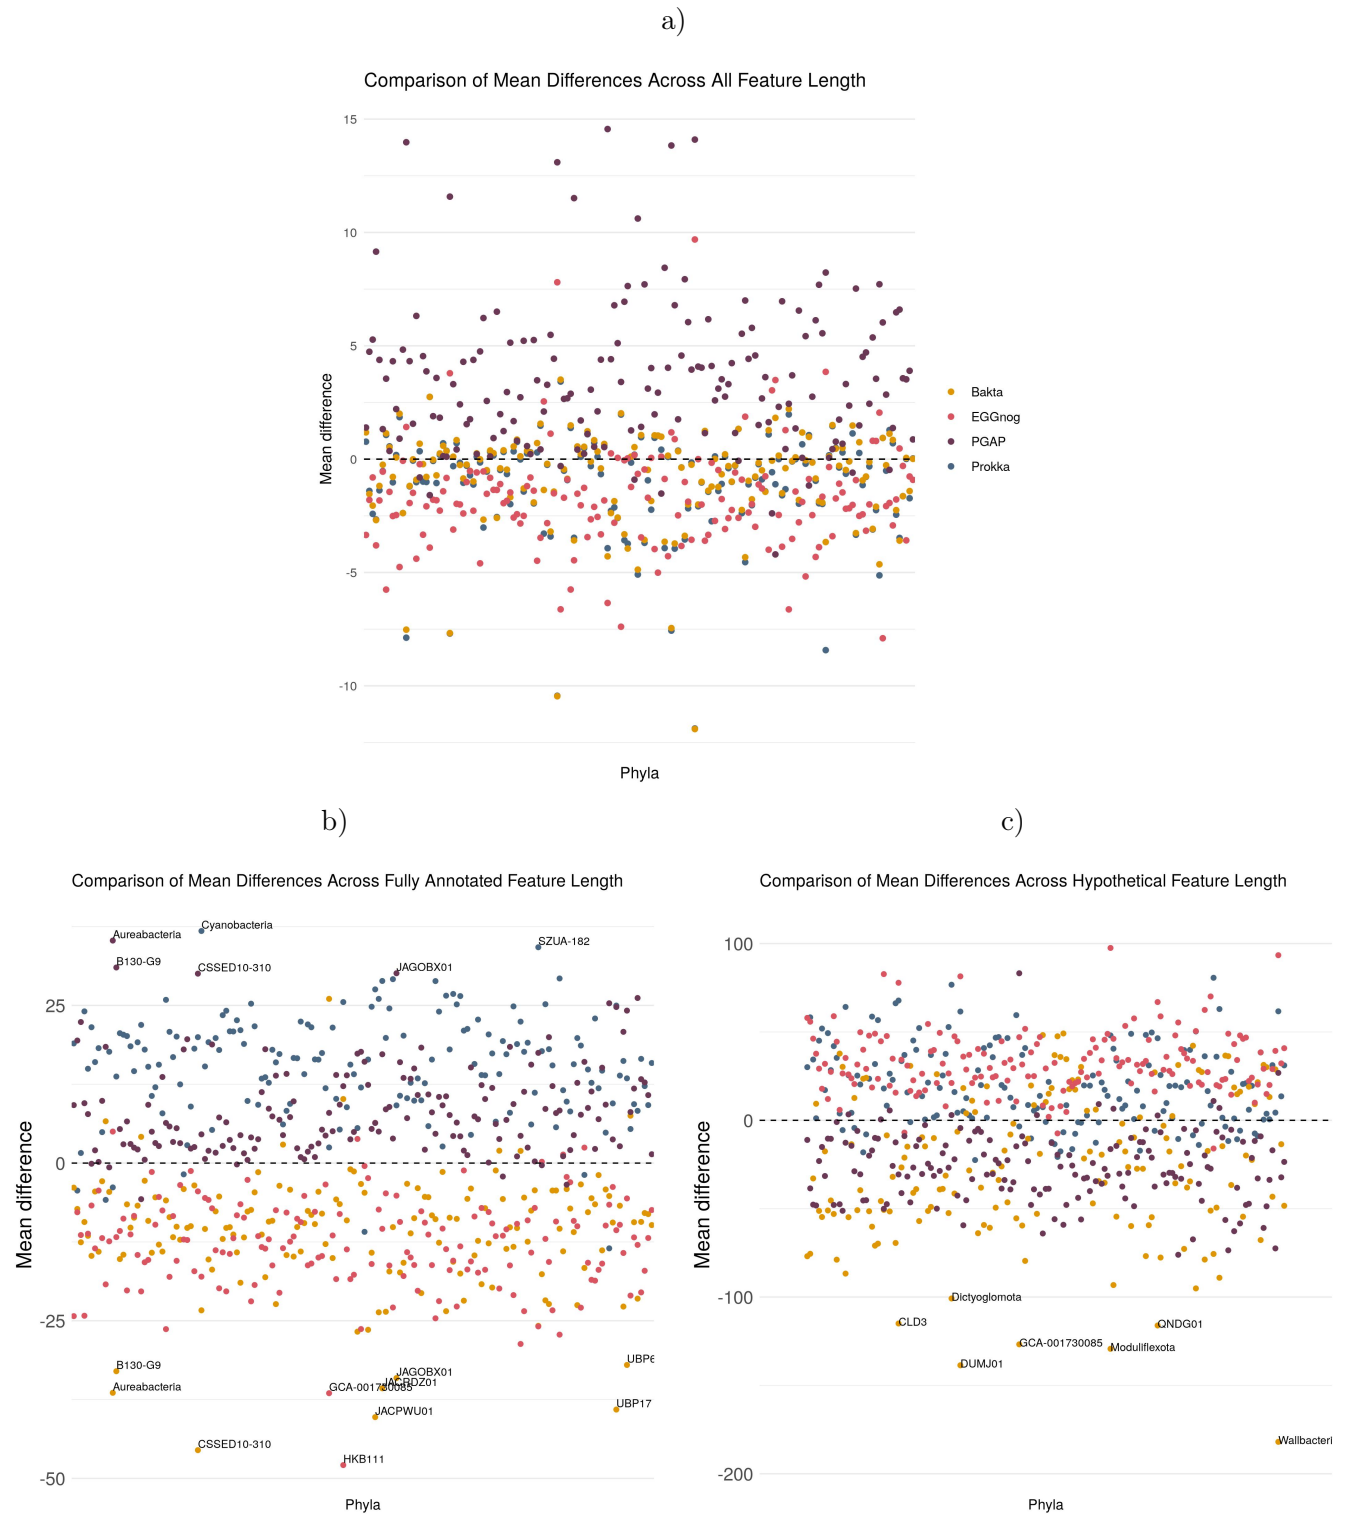

Figure 10: Comparison of mean differences in feature lengths for Prokka, Bakta, EggNOG-mapper, and PGAP across various phyla. Dashed horizontal lines at  $y = 0$  indicate no mean difference. Subplot A) shows differences in mean lengths of all features (including hypothetical and fully annotated), with phylum names annotated where the absolute difference exceeds 30. B) displays differences in mean lengths of described features, with annotations for absolute differences over 30. C) illustrates differences in mean lengths of undescribed features, with annotations for absolute differences over 100.

### 4.3 Analysis of rRNA prediction variance

Table 8: Top 20 samples with highest count of rRNA detected by Prokka

| id              | Prokka rRNA | Bakta rRNA | PGAP rRNA | Contig count |
|-----------------|-------------|------------|-----------|--------------|
| GCA_003674045.1 | 134         | 65         | 143       | 227          |
| GCA_002162355.1 | 108         | 108        | 108       | 1            |
| GCA_001623875.1 | 85          | 82         | 84        | 25           |
| GCA_002243515.1 | 80          | 80         | 80        | 1            |
| GCA_900176885.1 | 67          | 65         | 64        | 41           |
| GCA_900291985.1 | 59          | 55         | 54        | 16           |
| GCA_004006295.1 | 54          | 54         | 54        | 2            |
| GCA_008931805.1 | 53          | 53         | 53        | 2            |
| GCA_002355375.1 | 51          | 51         | 51        | 1            |
| GCA_013248975.1 | 51          | 51         | 51        | 3            |
| GCA_900460535.1 | 50          | 49         | 50        | 5            |
| GCA_900465055.1 | 50          | 50         | 50        | 1            |
| GCA_000196255.1 | 49          | 49         | 49        | 3            |
| GCA_002019605.1 | 49          | 49         | 49        | 17           |
| GCA_002019645.1 | 49          | 49         | 48        | 8            |
| GCA_900002575.1 | 49          | 48         | 49        | 1            |
| GCA_002109385.1 | 47          | 47         | 47        | 1            |
| GCA_016811915.1 | 47          | 47         | 47        | 1            |
| GCA_014879975.1 | 46          | 46         | 46        | 2            |
| GCA_900199725.1 | 47          | 46         | 40        | 69           |

Table 9: Top 20 samples with highest count of rRNA detected by Bakta

| id              | Prokka rRNA | Bakta rRNA | PGAP rRNA | Contig count |
|-----------------|-------------|------------|-----------|--------------|
| GCA_002162355.1 | 108         | 108        | 108       | 1            |
| GCA_001623875.1 | 85          | 82         | 84        | 25           |
| GCA_002243515.1 | 80          | 80         | 80        | 1            |
| GCA_003674045.1 | 134         | 65         | 143       | 227          |
| GCA_900176885.1 | 67          | 65         | 64        | 41           |
| GCA_900291985.1 | 59          | 55         | 54        | 16           |
| GCA_004006295.1 | 54          | 54         | 54        | 2            |
| GCA_008931805.1 | 53          | 53         | 53        | 2            |
| GCA_002355375.1 | 51          | 51         | 51        | 1            |
| GCA_013248975.1 | 51          | 51         | 51        | 3            |
| GCA_900465055.1 | 50          | 50         | 50        | 1            |
| GCA_000196255.1 | 49          | 49         | 49        | 3            |
| GCA_002019605.1 | 49          | 49         | 49        | 17           |
| GCA_002019645.1 | 49          | 49         | 48        | 8            |
| GCA_900460535.1 | 50          | 49         | 50        | 5            |
| GCA_900002575.1 | 49          | 48         | 49        | 1            |
| GCA_002109385.1 | 47          | 47         | 47        | 1            |
| GCA_016811915.1 | 47          | 47         | 47        | 1            |
| GCA_014879975.1 | 46          | 46         | 46        | 2            |
| GCA_900199725.1 | 47          | 46         | 40        | 69           |

Table 10: Top 20 samples with highest count of rRNA detected by PGAP

| id              | Prokka rRNA | Bakta rRNA | PGAP rRNA | Contig count |
|-----------------|-------------|------------|-----------|--------------|
| GCA_000415505.1 | 22          | 17         | 227       | 1731         |
| GCA_003674045.1 | 134         | 65         | 143       | 227          |
| GCA_002162355.1 | 108         | 108        | 108       | 1            |
| GCA_009720735.1 | 32          | 28         | 93        | 151          |
| GCA_014502795.1 | 18          | 18         | 90        | 218          |
| GCA_016587775.1 | 14          | 10         | 90        | 730          |
| GCA_001623875.1 | 85          | 82         | 84        | 25           |
| GCA_000986785.1 | 35          | 31         | 80        | 104          |
| GCA_002243515.1 | 80          | 80         | 80        | 1            |
| GCA_013359935.1 | 18          | 18         | 78        | 206          |
| GCA_002257705.1 | 28          | 21         | 75        | 165          |
| GCA_003148565.1 | 26          | 26         | 71        | 71           |
| GCA_018332455.1 | 1           | 19         | 69        | 143          |
| GCA_002897295.1 | 15          | 19         | 67        | 197          |
| GCA_002008345.1 | 21          | 21         | 66        | 138          |
| GCA_018403325.1 | 17          | 18         | 64        | 101          |
| GCA_900176885.1 | 67          | 65         | 64        | 41           |
| GCA_016902295.1 | 12          | 12         | 61        | 265          |
| GCA_003865095.1 | 22          | 22         | 58        | 178          |
| GCA_018333315.1 | 12          | 11         | 56        | 146          |

### 4.3.1 Capability of PGAP to annotate rRNA features across high contig genomes

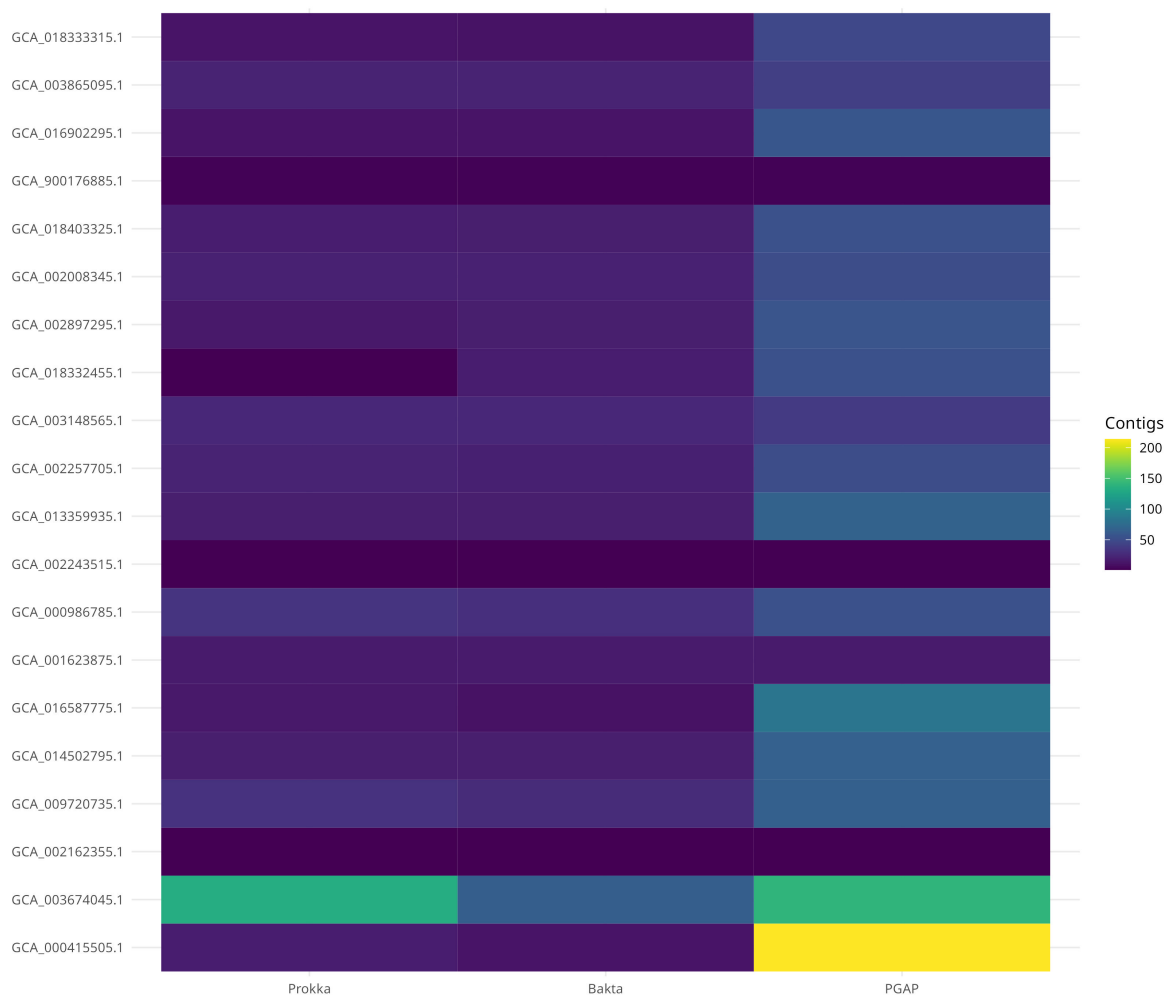

Figure 11: Heatmap of the abundance of unique contigs with rRNA features in the 20 samples with the highest rRNA counts. Color intensity within each cell represents the relative abundance of unique contigs identified as containing rRNA sequences. The raw counts and total contig counts are displayed in Supplementary Tab. 10.

## 5 Archaea

### 5.1 Data description

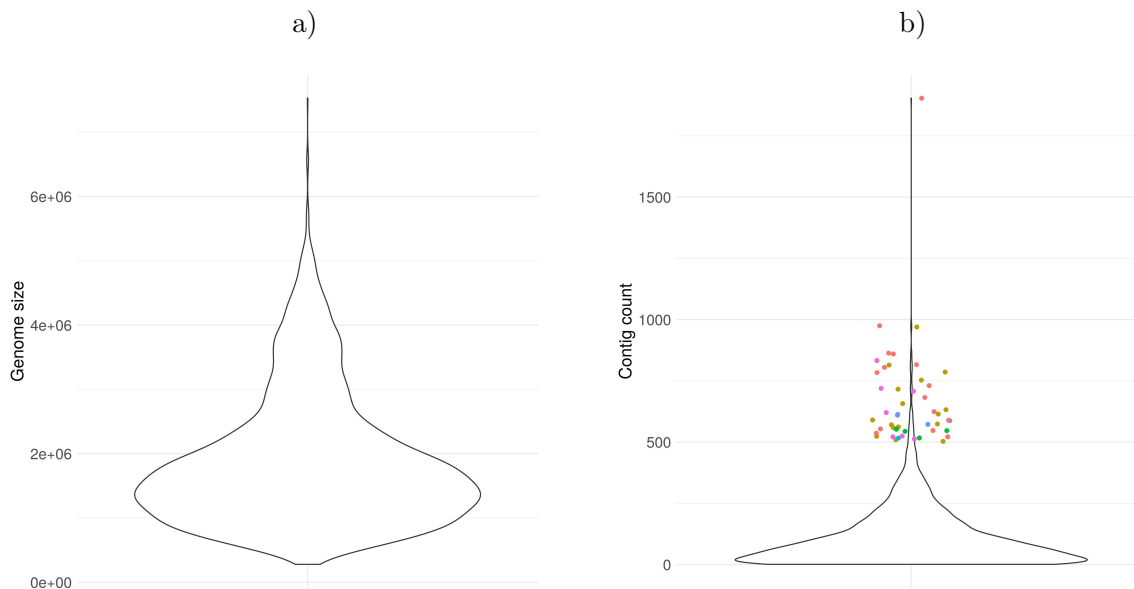

Figure 12: Basic metrics characterizing the Archaea subgroup within the analyzed samples. Each panel presents a distinct attribute: (A) Genome size derived from genome\_size variable, (B) Contig count derived from contig\_count variable. Major outliers in the respective categorise are shown as a dots, colour coded by their phylia obtained from gtdb\_taxonomy variable.

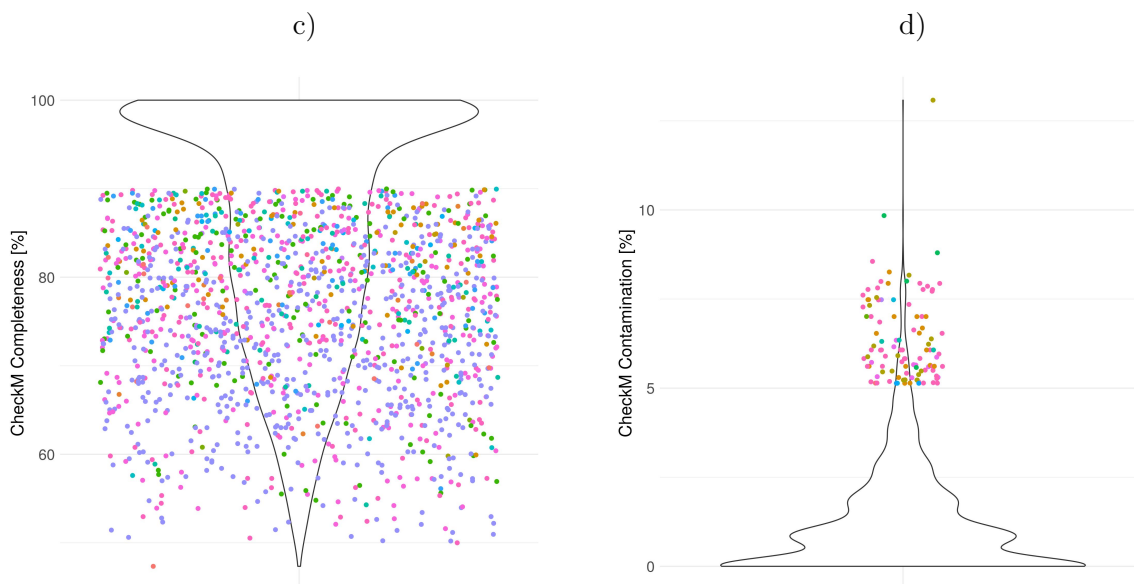

Figure 13: Basic metrics characterizing the Archaea subgroup within the analyzed samples. Each panel presents a distinct: (C) Genome completeness derived from GTDB checkm\_completeness variable, and (D) Genome contamination derived from GTDB checkm\_contamination variable. Major outliers in the respective categorise are shown as a dots, colour coded by their phylia obtained from gtdb\_taxonomy variable.

## 5.2 RNA comparison for Archaea subgroup

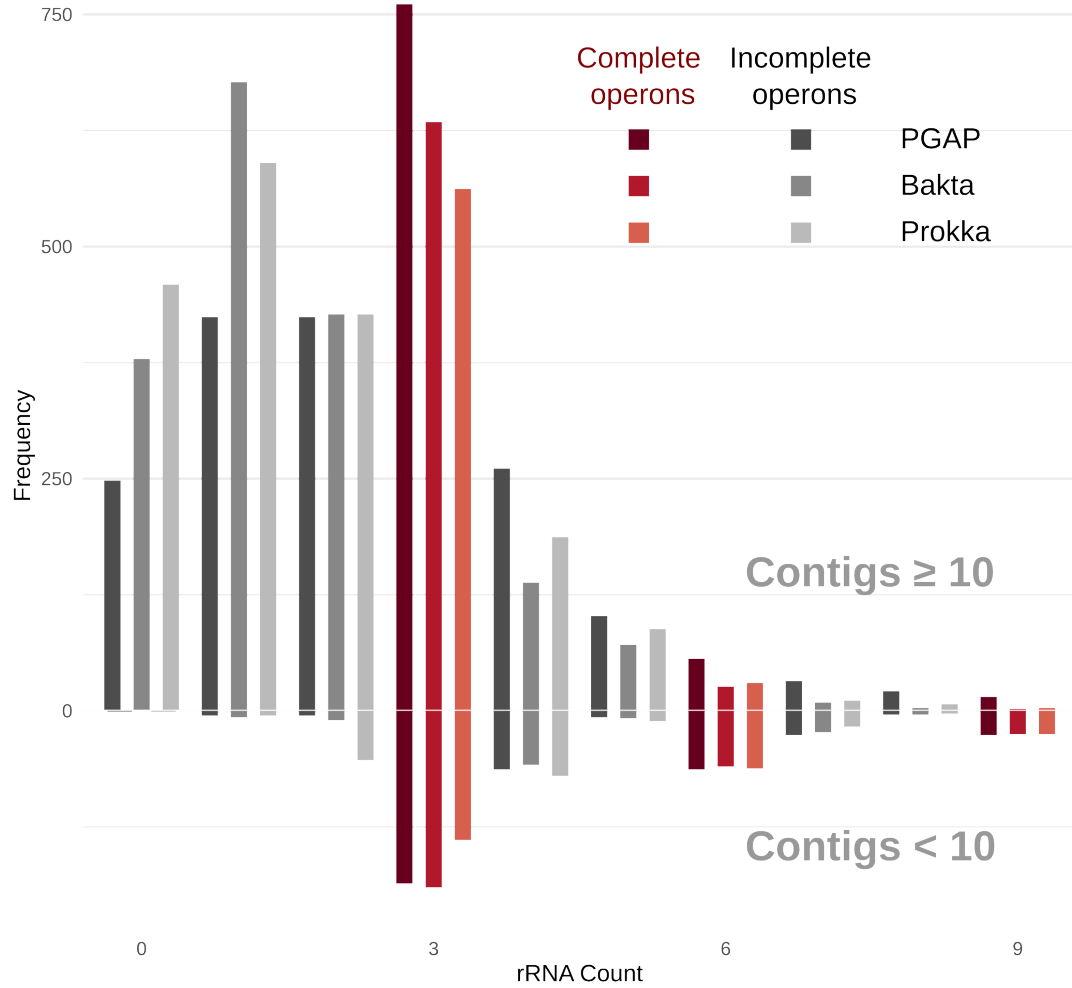

Figure 14: Distribution of rRNA counts in complete and incomplete operons across each tool in Archaea. The upper panel displays the more fragmented genomes, characterized by having more than 10 contigs. In contrast, the bottom panel shows the less fragmented samples, with fewer than 10 contigs. Complete operons, containing multiples of 3 rRNA genes, are highlighted in red, while incomplete operons are displayed in gray.



### 5.3 Feature length comparison by phyla

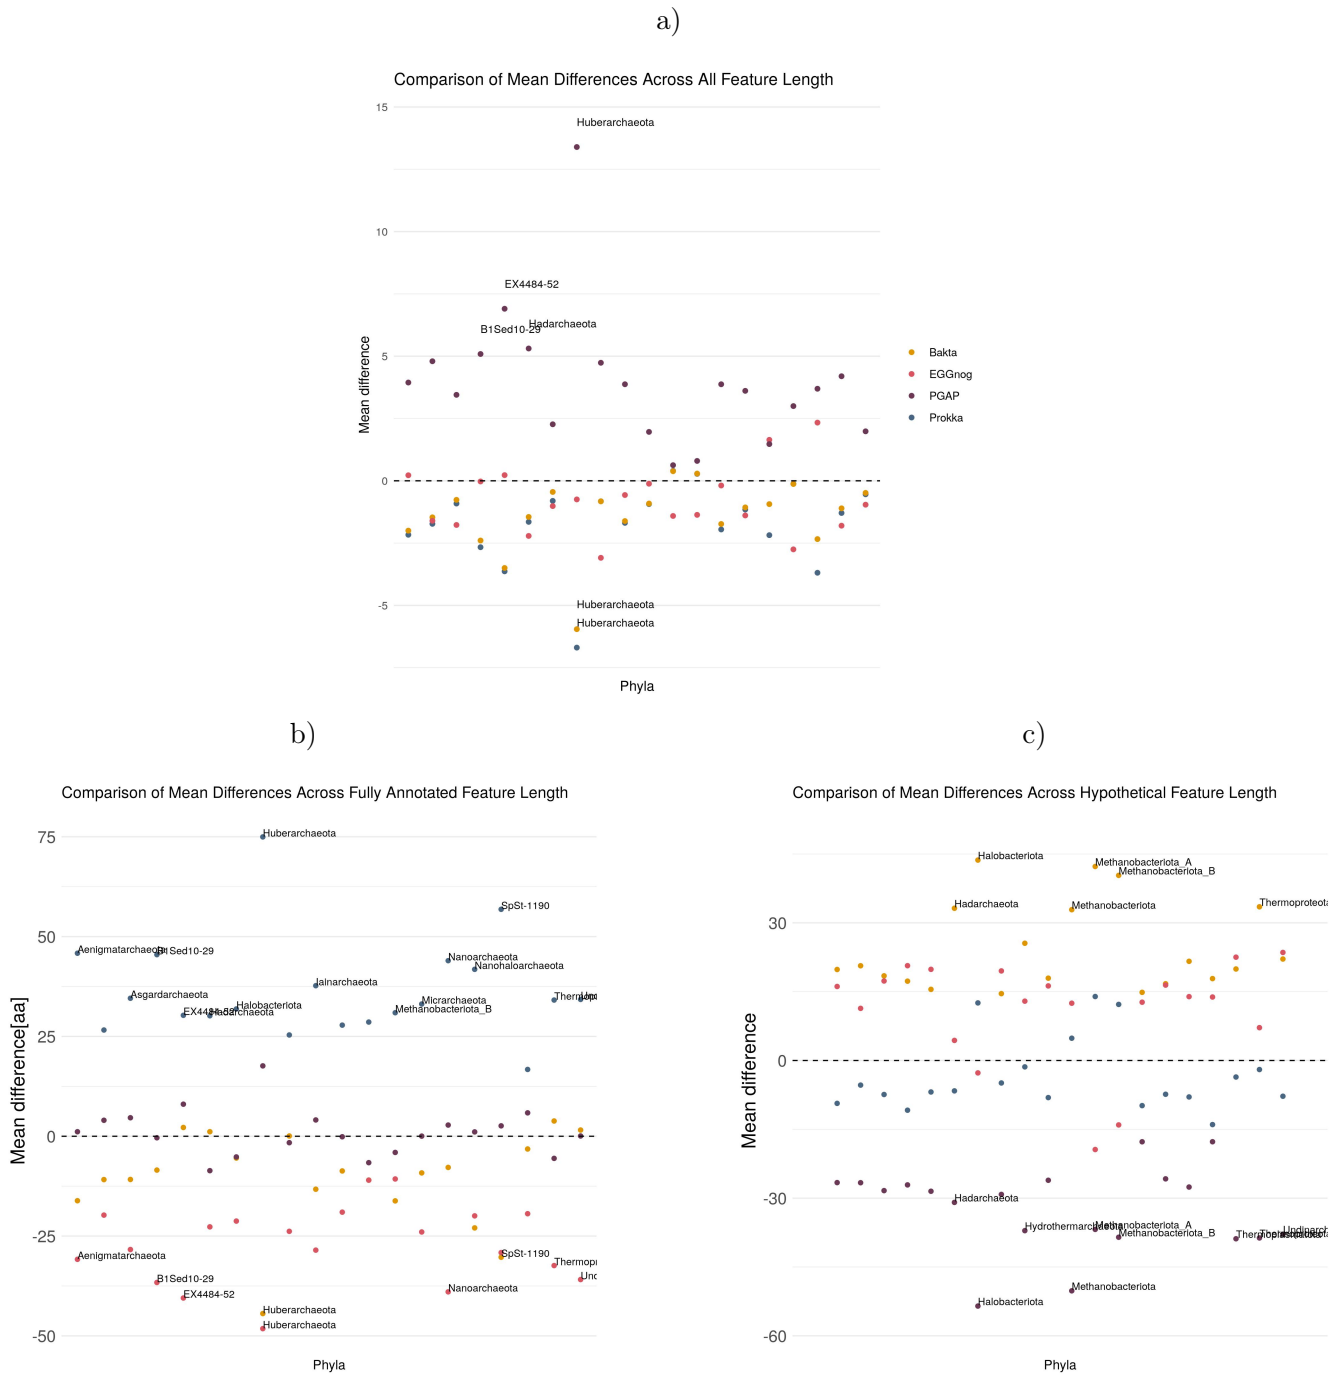

Figure 15: Comparison of mean differences across feature lengths between tools in phyla. Dashed horizontal lines at  $y = 0$ , denotes no difference in means. a) Difference between total mean length (including both hypothetical and fully annotated features), phylum name is annotated in cases where absolute difference from the mean of all tools is higher than 30. b) Difference in described mean length, phylum name is annotated in cases where absolute difference is higher than 30, c) Difference in undescribed mean length, phylum name is annotated in cases where absolute difference is higher than 100.

## 6 Metagenome-asssembled genomes (MAGs)

### 6.1 Data description

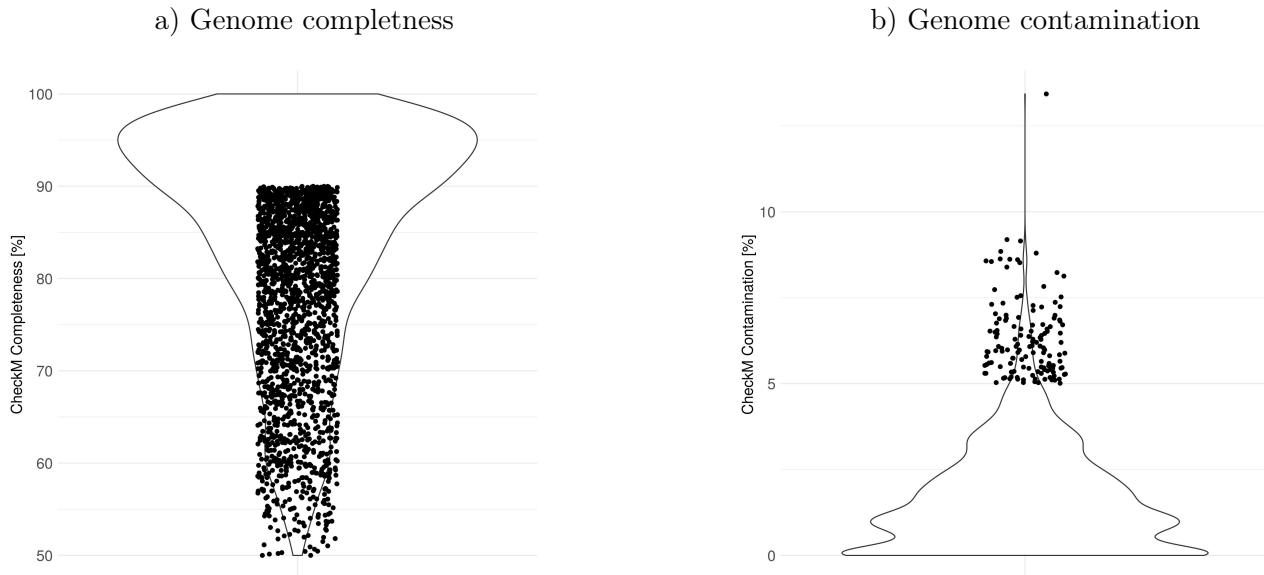

Figure 16: Basic metrics characterizing the MAGs subgroup within the analyzed samples. Each panel presents a distinct attribute reported in GTDB/NCBI dataset: (a) Genome completeness derived from GTDB checkm\_completeness variable, and (b) Genome contamination derived from GTDB checkm\_contamination variable.

### 6.2 Coding length comparison

#### a) Undescribed proteins length in Bacteria

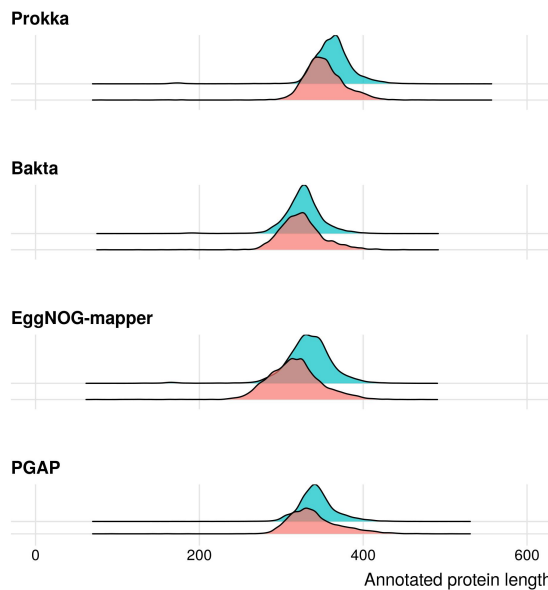

#### b) All protein length in Bacteria

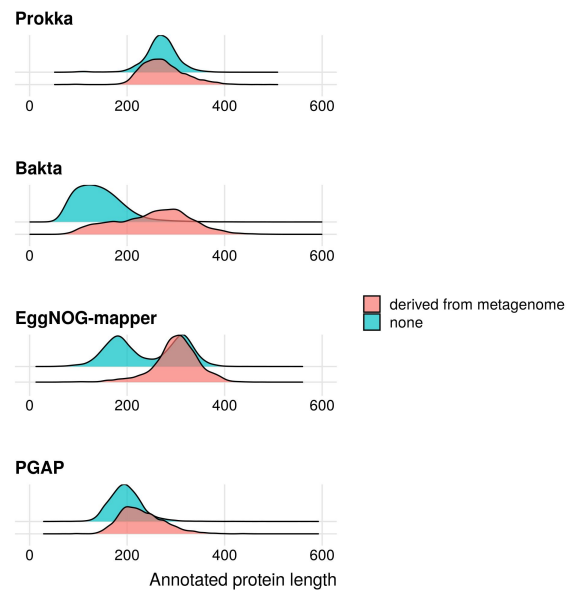

Figure 17: Comparison of metagenome protein lengths across analyzed annotation tools in Bacteria. Plot (a) describes the distribution of hypothetical protein lengths, while plot (b) includes all protein lengths.

a) Undescribed proteins length in *E. coli*

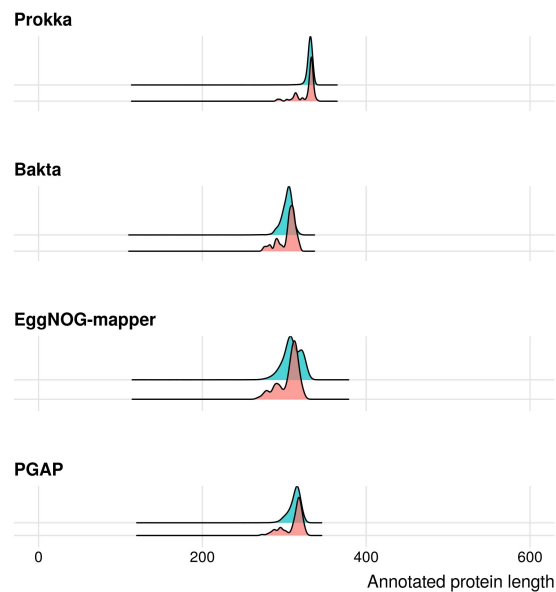

b) All protein length in *E. coli*

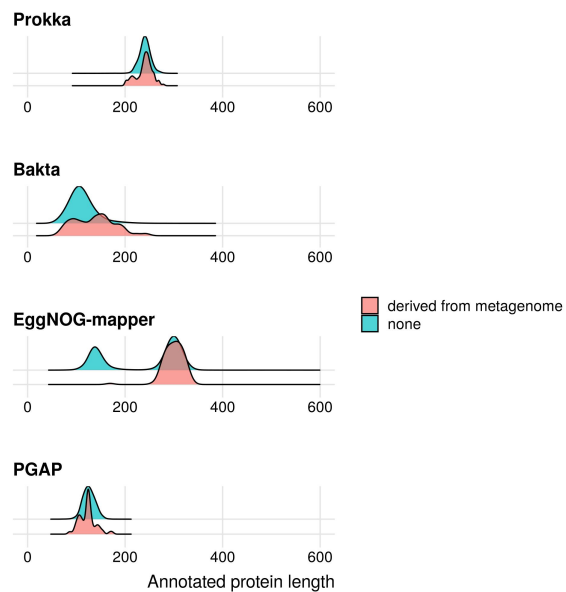

Figure 18: Comparison of metagenome protein lengths across analyzed annotation tools in *E. coli*. Plot (c) describes the distribution of hypothetical protein lengths, while plot (d) includes all protein lengths.

## 7 Frameshifted genomes

### 7.1 Genome region comparison

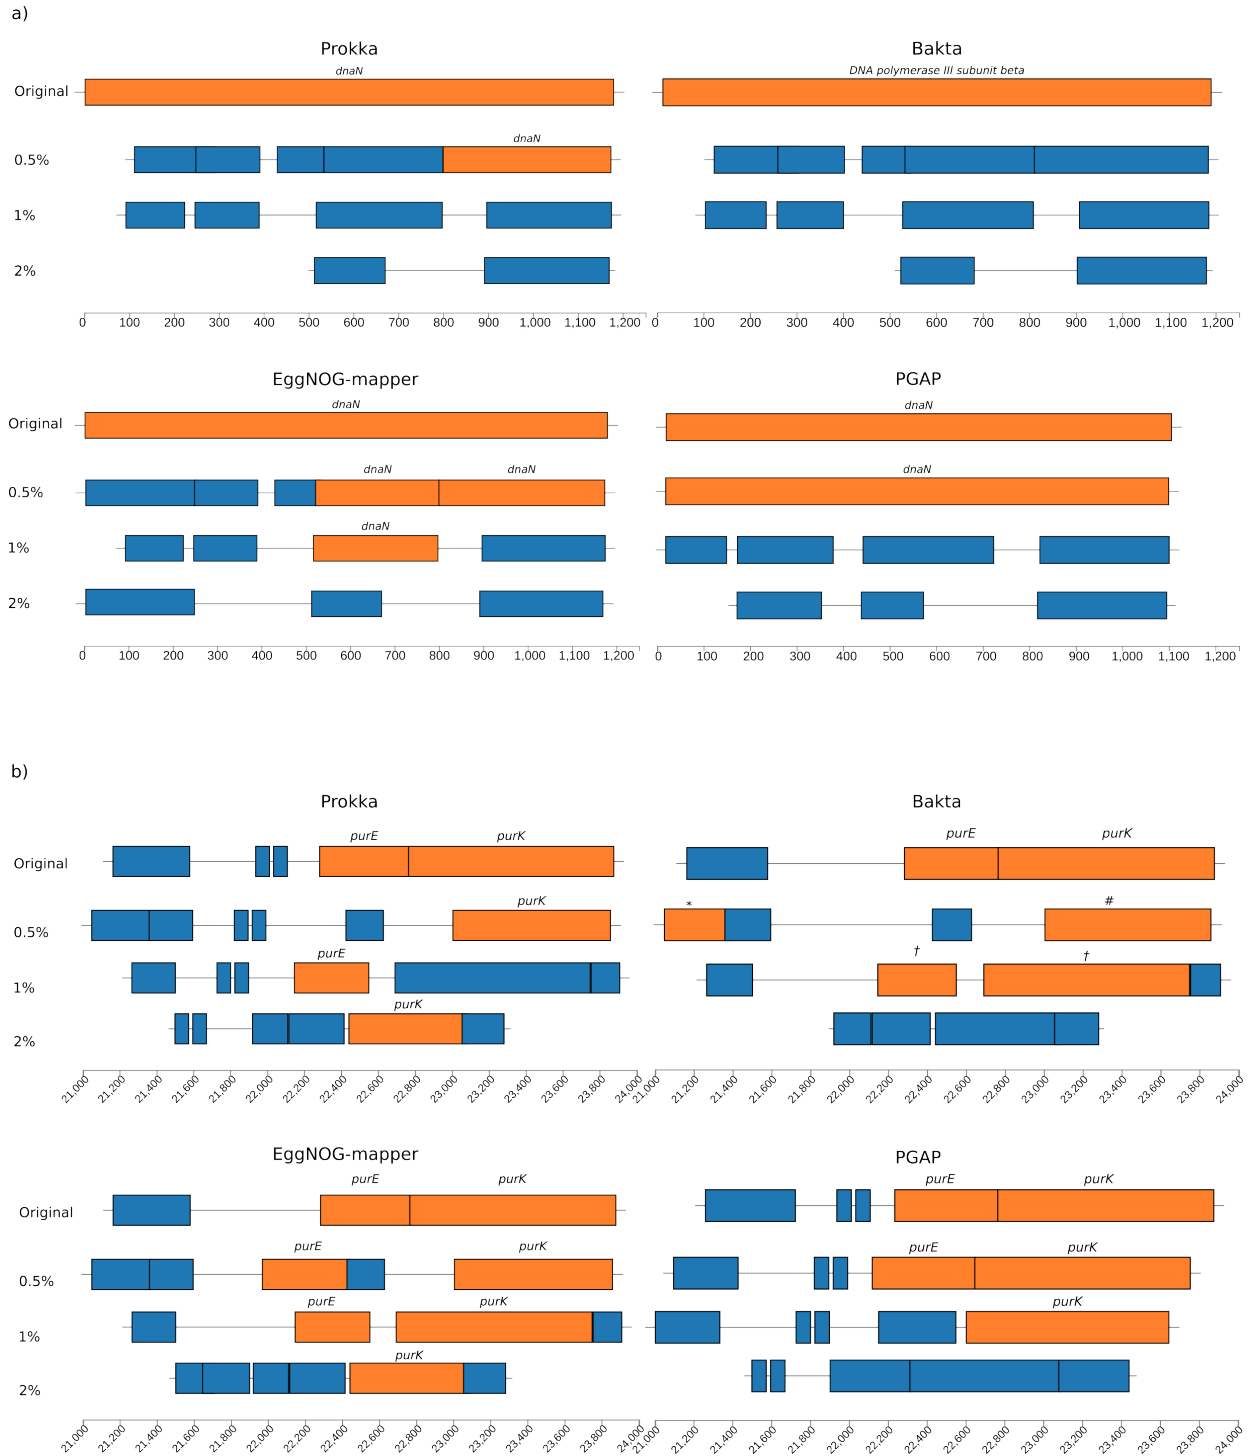

Figure 19: Investigation of gene fragmentation between the original genome sequence (GCA\_000008565.1) and sequences with increasing deletion rates (0.5%, 1%, 2% of the full genome). Only gene features fully contained within the investigated regions are displayed. As deletion rates increase, the expected location of features shifts to the left of the plot. Blue features represent undescribed genes, while orange features represent described genes. **a)** Region 1:1,200 bp. **b)** Region 21,000:24,000 bp. Symbols for features with longer names are: \* UDG domain-containing gene, # ATP-grasp domain-containing protein, + N5-carboxyaminoimidazole ribonucleotide synthase.

## 8 Temporal analysis

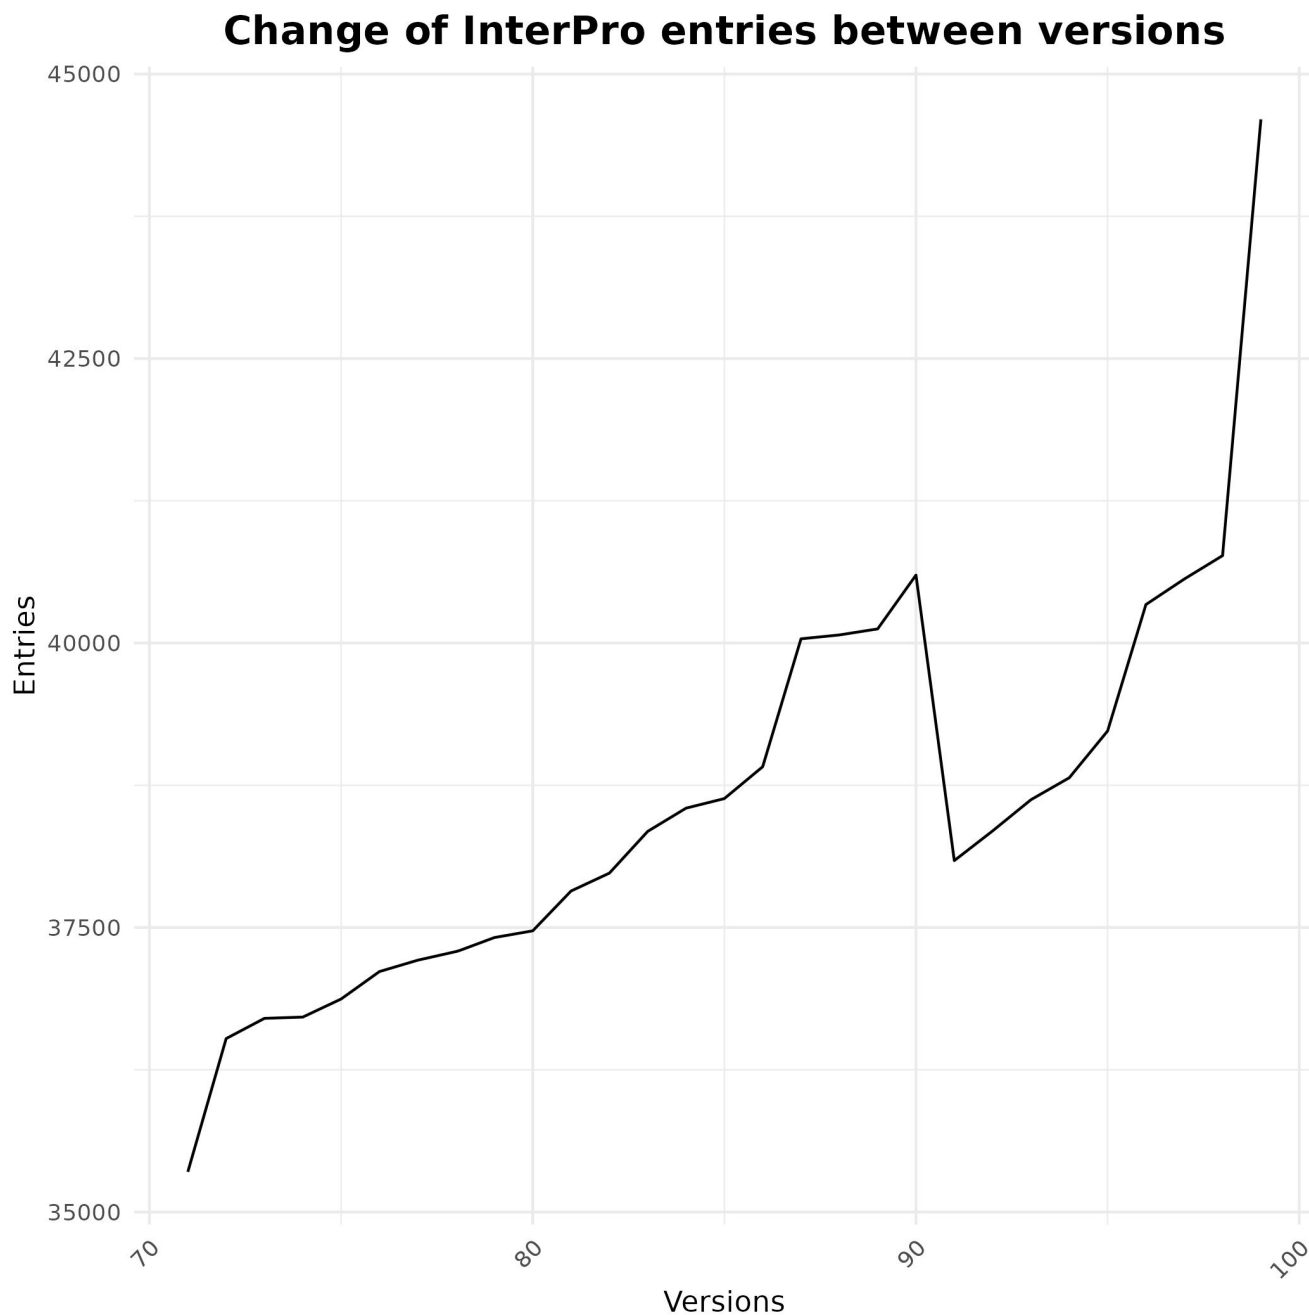

Figure 20: Stability of protein count in annotation results reported by NCBI across reported submission years. For example InterPro witnessed a substantial growth in its entries, expanding from 38,088 to 46,035 within just two years (InterPro 91.0 in October 2022 to 102.0 in October 2024)

## 8.1 Database increase of unique species across years

- a) GTDB unique Bacteria species increase per GTDB release.      b) GTDB unique Archaea species increase per GTDB release.

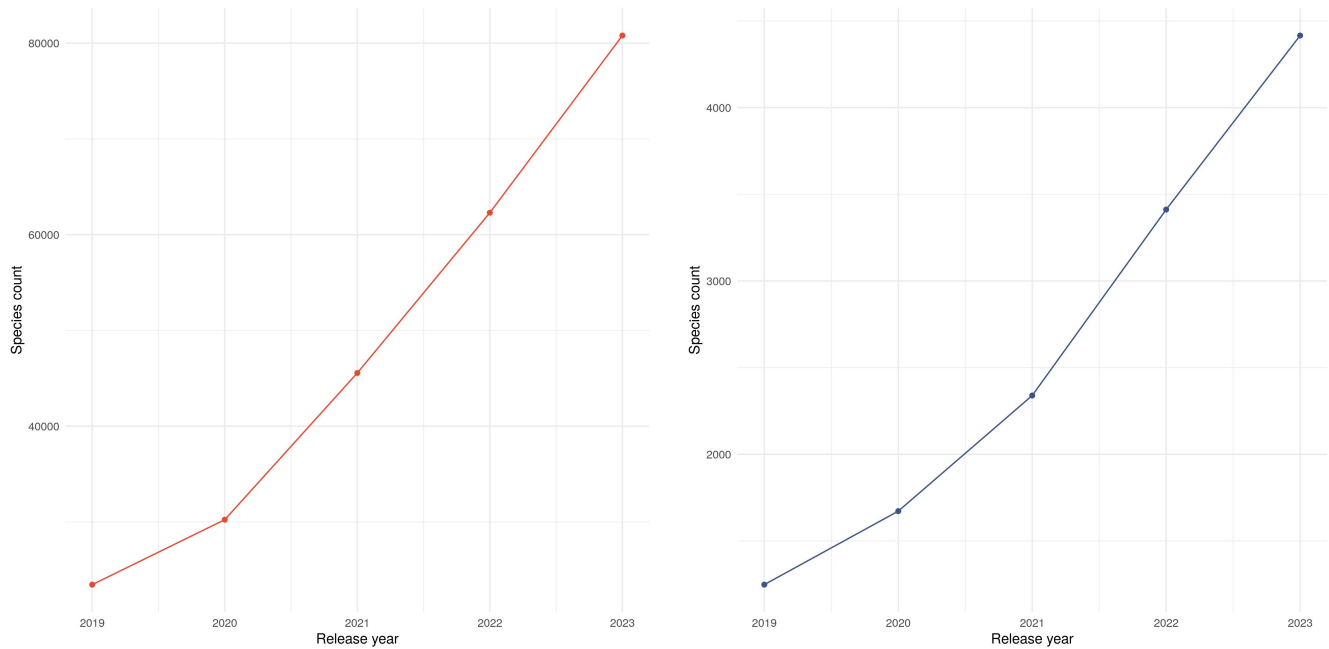

Figure 21: Increase in unique species per GTDB release for Bacteria and Archaea.

## 9 Annotation performance over time

(a) Stability of protein count in *E. coli* samples.

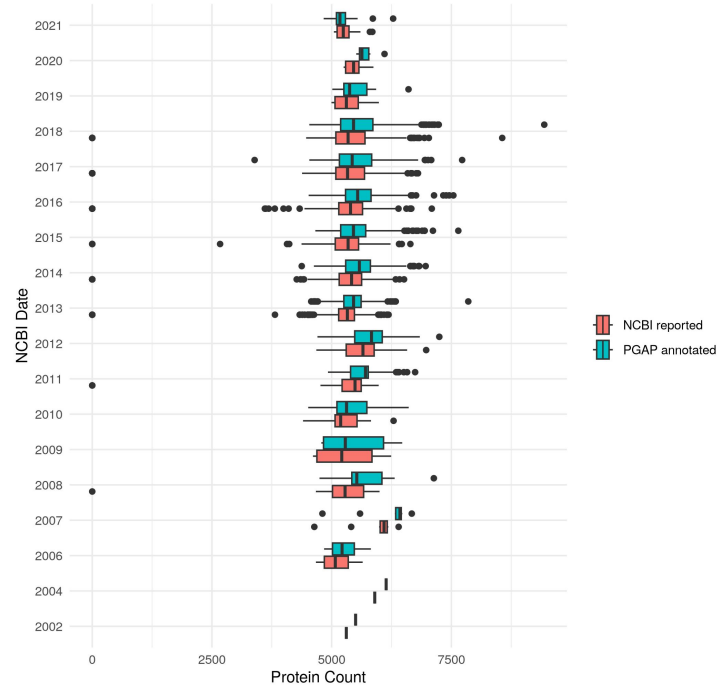

(b) Stability of protein count in Bacteria kingdom.

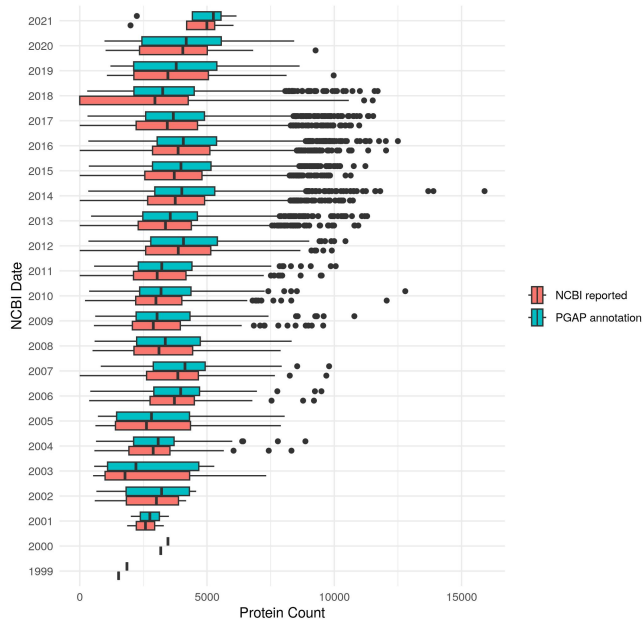

(c) Stability of protein count in Archaea kingdom.

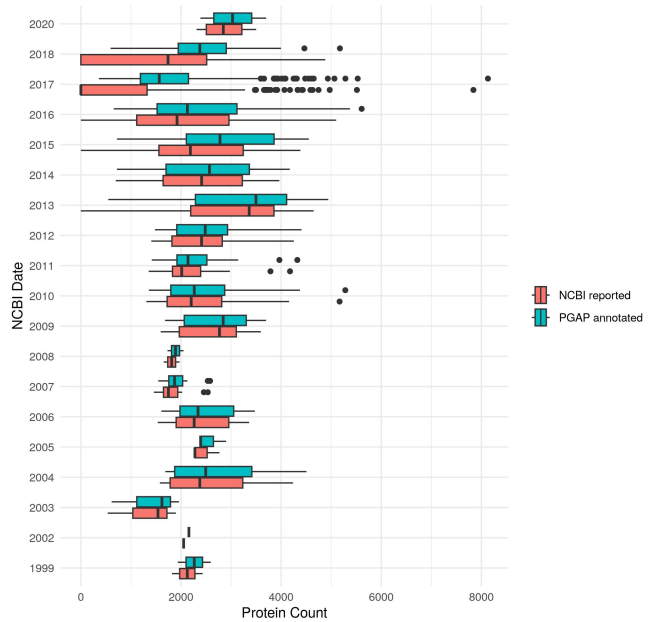

Figure 22: Stability of reported protein count across submission years for different taxonomic groups. (a) *E. coli* group. (b) Bacteria kingdom. (c) Archaea kingdom.

## 10 Workflow visualization

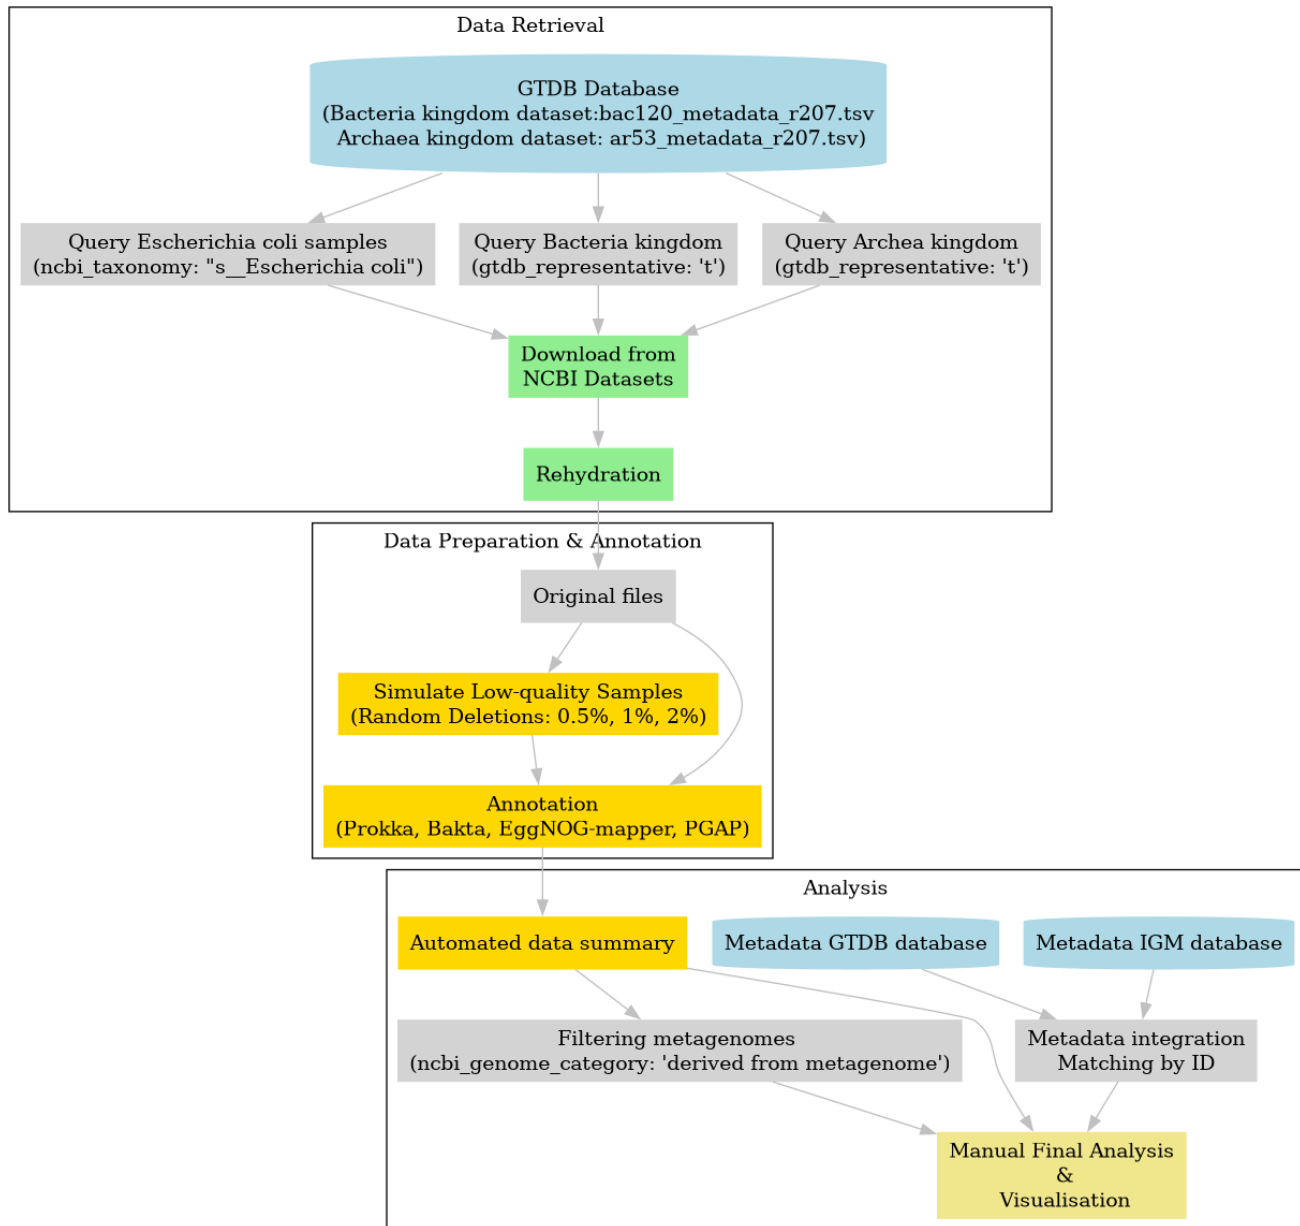

Figure 23: Workflow diagram illustrating the workflow execution. The diagram depicts genome querying and retrieval from the Genome Taxonomy Database (GTDB) and NCBI Datasets, followed by data preparation, annotation using Prokka, Bakta, EggNOG-mapper, and PGAP, automated data summary using RScript, metadata integration, and manual final analysis and visualization. Grey arrows indicate the flow of data and processing steps in the workflow. Color-coded elements highlight different stages: lightblue represents external databases, lightgreen denotes NCBI datatool tool usage, gold indicates steps included in Nextflow workflow, and khaki signifies the final manual analysis.



## 11 Decision tree

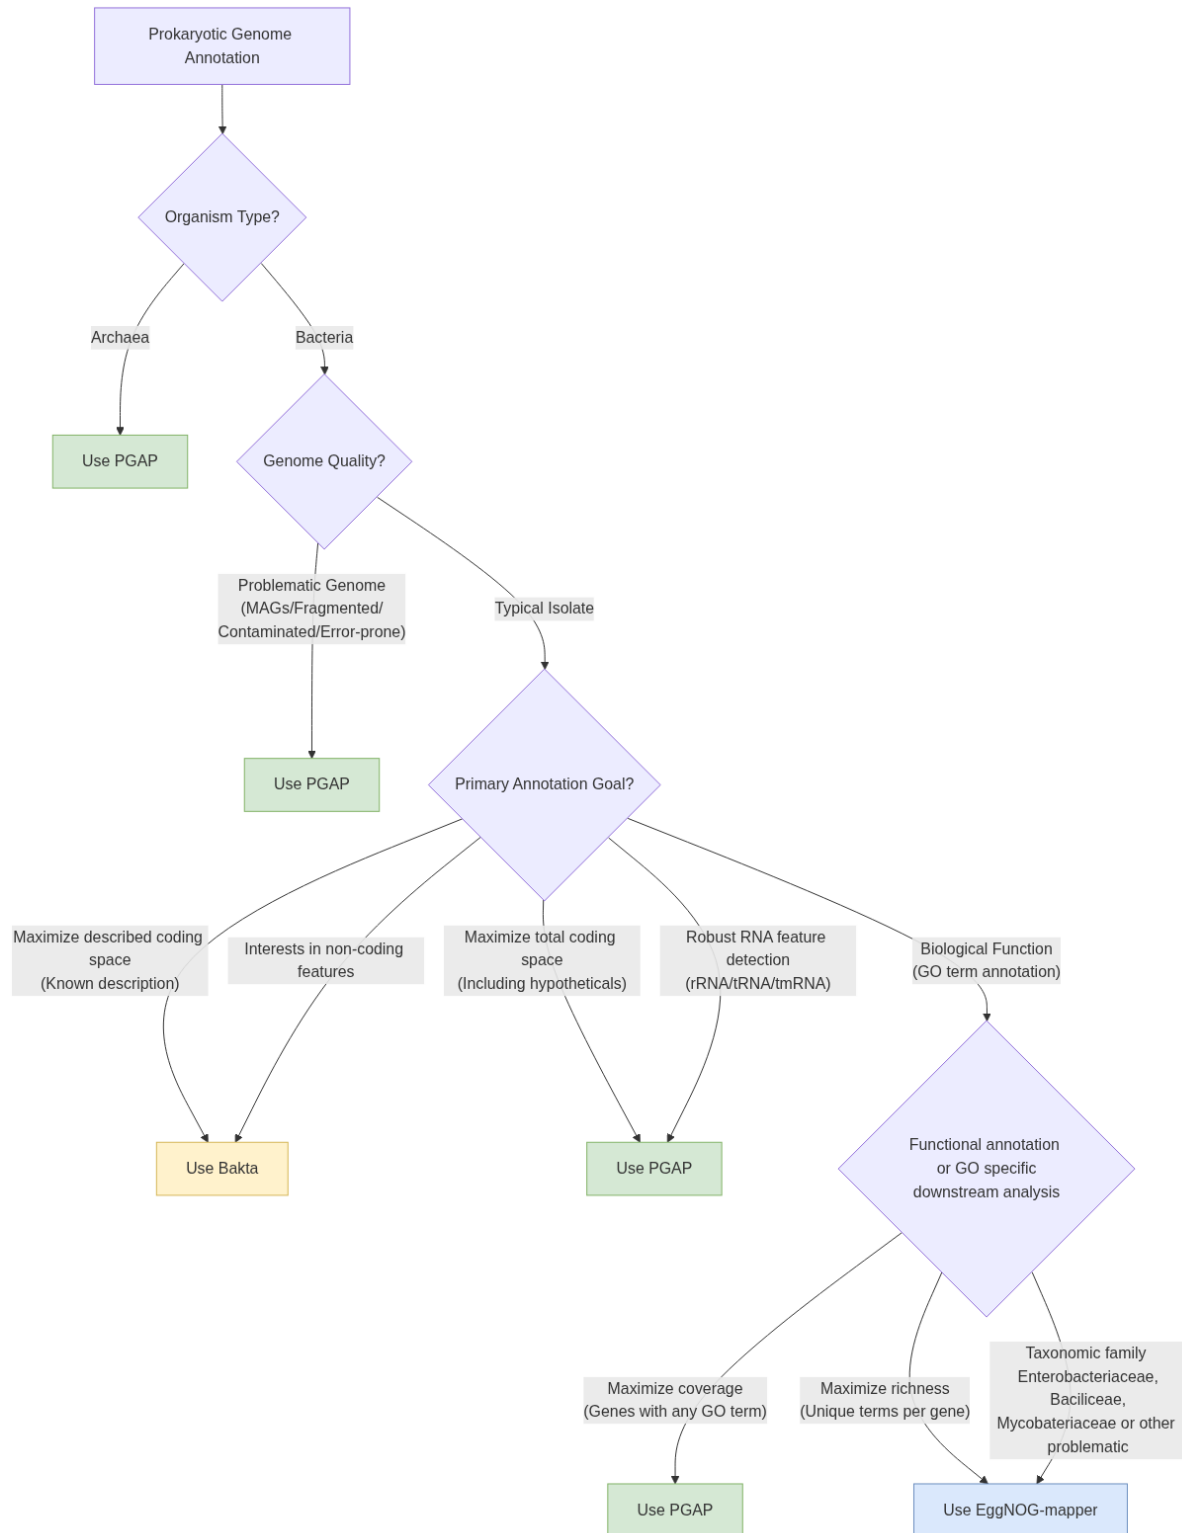

Figure 24: Simplified decision tree for choosing an appropriate annotation strategy
